# Supplementary material for: Conserved Transcriptome Features Define Prepubertal Primate Spermatogonial Stem Cells as Adark Spermatogonia and Identify Unique Regulators
Source: MDPI journal article supplement (doi:10.3390/ijms24054755), 2023-03-01
Supplement: s1 [file s1]

**Table S1.** Prepubertal testis single-cell RNA-seq datasets.

|                                    | <b>Guo et al.,<br/>2018 [44]</b>                                                               | <b>Sohni et<br/>al., 2019<br/>[42]</b>                                                                                          | <b>Guo et al.,<br/>2020 [43]</b>                                                                 | <b>Hermann et<br/>al., 2018 [33]</b>                                                             | <b>This Study</b>                                                                        | <b>This Study</b>                                                                           |
|------------------------------------|------------------------------------------------------------------------------------------------|---------------------------------------------------------------------------------------------------------------------------------|--------------------------------------------------------------------------------------------------|--------------------------------------------------------------------------------------------------|------------------------------------------------------------------------------------------|---------------------------------------------------------------------------------------------|
| <b>Age</b>                         | (infant) 12 and<br>13 months                                                                   | (newborn)<br>2 and 7<br>days                                                                                                    | (juvenile) 7<br>and 11 years                                                                     | Postnatal<br>day (P) 6                                                                           | 15 and 20<br>months                                                                      | Postnatal<br>day 0, 26<br>months                                                            |
| <b># Testis<br/>cells</b>          | 2245<br>Infant1_1- 568<br>Infant1_2- 467<br>Infant2_1- 597<br>Infant2_2- 613                   | 24,780<br>D2_I—<br>2353<br>D2_T—<br>6490<br>D7_I—<br>11,767<br>D7_T—<br>4170                                                    | 3727<br>11 yo_rep1—<br>1069<br>11 yo_rep2—<br>700<br>7 yo_rep1—<br>991<br>7 yo_rep2—<br>967      | 13,554<br>Bright—5552<br>Dim—4391<br>Unselected—<br>3611                                         | 23,219<br>B36506A—<br>9306<br>B36506B—<br>5921<br>B37979—7992                            | 25,342<br>R34403—<br>9935<br>R37136A—<br>8253<br>R37136B—<br>7154                           |
| <b>Mean<br/>Reads per<br/>Cell</b> | Infant1_1-<br>79,287<br>Infant1_2-<br>91,489<br>Infant2_1-<br>131,936<br>Infant2_2-<br>137,661 | D2_I—<br>31,753<br>D2_T—<br>21,702<br>D7_I—<br>21,792<br>D7_T—<br>25,900                                                        | 11 yo_rep1—<br>166,257<br>11 yo_rep2—<br>44,427<br>7 yo_rep1—<br>86,716<br>7 yo_rep2—<br>129,258 | Bright—<br>108,179<br>Dim—<br>117,390<br>Unselected—<br>160,375                                  | B36506A—<br>62,329<br>B36506B—<br>73,549<br>B37979—<br>51,717                            | R34403—<br>70,364<br>R37136A—<br>55,596<br>R37136B—<br>81,417                               |
| <b>Replication</b>                 | Two technical<br>replicates from<br>each of two<br>individuals                                 | One<br>technical<br>replicate of<br>ITGA6-<br>enriched<br>(I) or<br>unsorted<br>cells (T)<br>from each<br>of two<br>individuals | Two technical<br>replicates from<br>each of two<br>individuals                                   | One<br>technical<br>replicate per<br>sample<br>derived from<br>multiple<br>pups in one<br>litter | Two technical<br>replicates from<br>B36506, one<br>technical<br>replicate from<br>B37979 | Two<br>technical<br>replicates<br>from R37136,<br>one technical<br>replicate<br>from R34403 |
| <b>Accession<br/>#</b>             | GSE120508                                                                                      | GSE124263                                                                                                                       | GSE134144                                                                                        | GSE108970                                                                                        | GSE222105                                                                                | GSE222105                                                                                   |

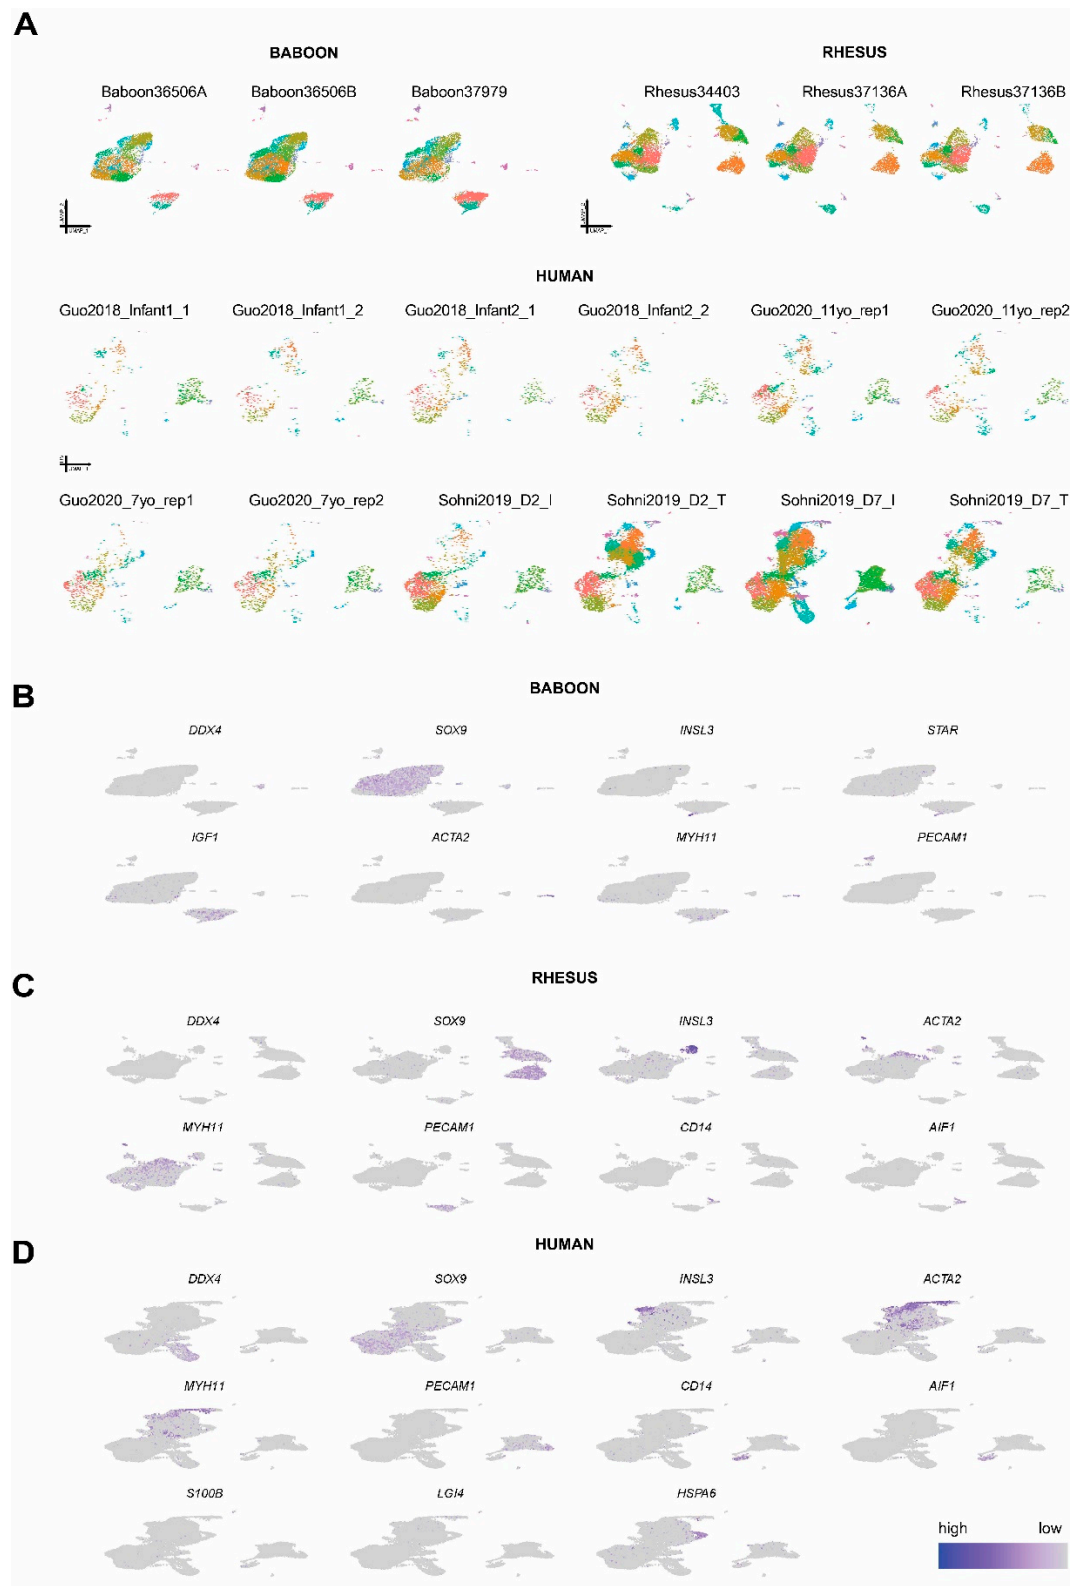

**Figure S1.** Profiling of single-cell transcriptomes of prepubertal human, baboon, and macaque testicular cells. UMAP plot visualization of the testicular cells from (A) baboon, rhesus macaque, and human displayed by replicates (same data as Figure 1). Each dot represents a single cell, which is colored by cluster annotations. (B–D) UMAP plots showing the testicular cells from (B) baboon, (C) rhesus macaque, and (D) human testes, which are color-coded to show the expression pattern of the selected gene markers specific for germ and somatic cell lineages.

**Table S2.** Differentially expressed genes and pathway analyses related to Figures 1–3. An Excel spreadsheet with multiple tabs relating to Figures 1–3. Each tab is labeled according to the relevant figure panel.

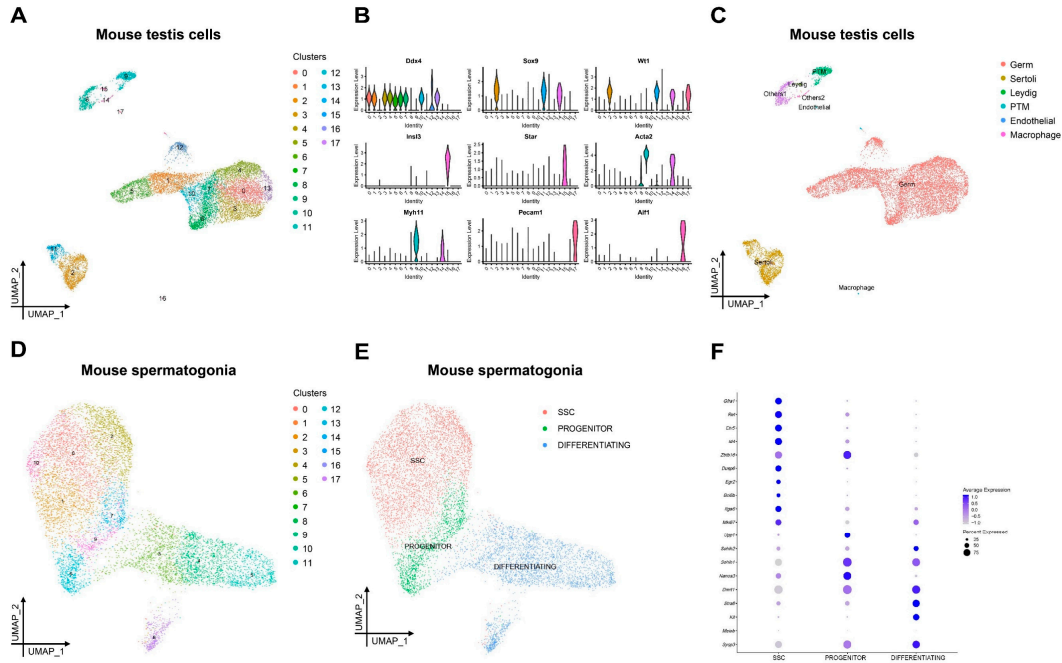

**Figure S2. Single-cell transcriptome analysis of testis cells from postnatal day 6 (P6) mouse.** (A and C) UMAP plot visualization of single-cell transcriptomes from P6 mouse testis ( $n=13,554$ ) colored by (A) unbiased cluster annotation ( $n=18$ ) and (C) colored by cell type. (B) Violin plots of mouse testes cells which are color-coded according to cluster annotations showing the expression of selected gene markers specific for germ and somatic cell lineages. (D-E) UMAP projections showing re-clustering of mouse germ cells colored by (D) unbiased clusters and (E) cell types. (F) Dotplot shows the expression of selected markers of undifferentiated and differentiated spermatogonia for each germ cell subset seen in UMAP plot labelled as SSC, progenitor and differentiating. The size of each dot represents the percentage of cells within a cell type, while the color encodes the average expression level across all cells within a cell type (blue is high).

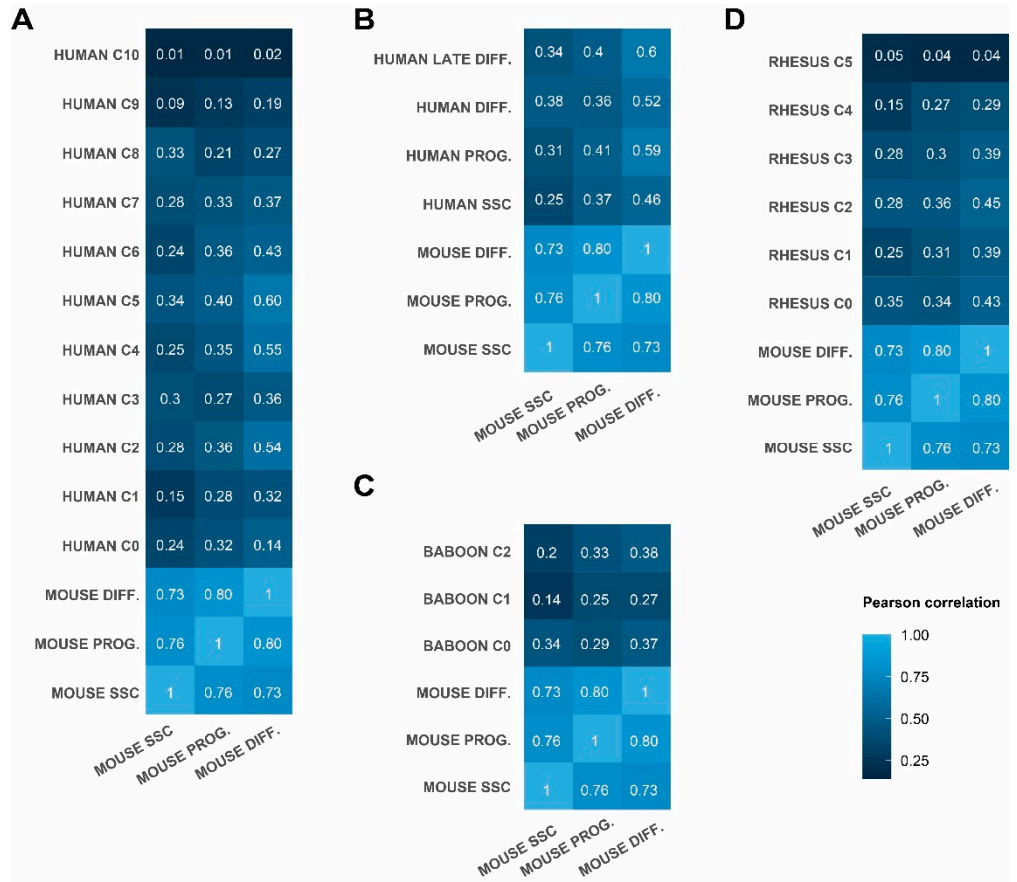

**Figure S3.** Cross-species comparison of mouse SSCs with human, baboon, and rhesus spermatogonial clusters. **(A)** Correlation heatmap shows the comparison of the mouse SSC cluster with human unbiased spermatogonial clusters (Human C0–10), colored based on the Pearson correlation coefficient. **(B)** Correlation heatmap shows the comparison of the mouse SSC cluster with human spermatogonial cell types (SSC, Progenitor, Differentiating, and Late differentiating). **(C)** Correlation heatmap shows the comparison of the mouse SSC cluster with unbiased baboon germ clusters (Baboon C0–2). **(D)** Correlation heatmap shows the comparison of the mouse SSC cluster with unbiased rhesus germ clusters (Rhesus C0–5).

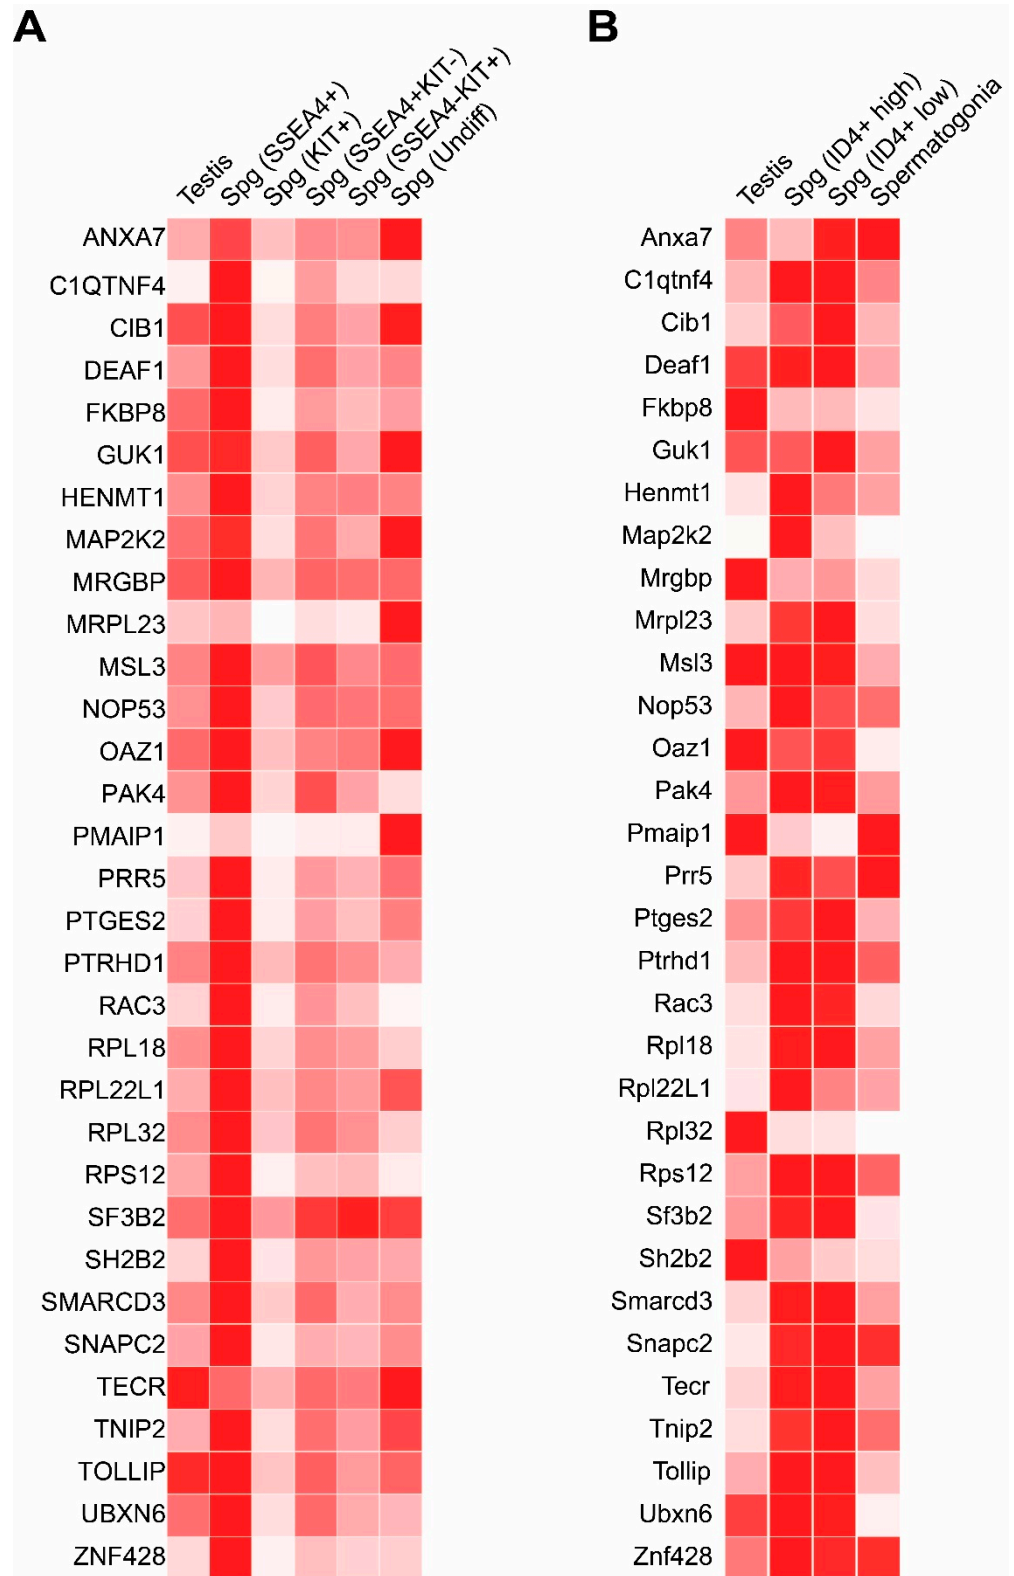

**Figure S4.** Primate SSC marker expression in published human and mouse RNA-seq datasets. Heatmap shows mRNA expression of 32 genes with elevated expression in the primate SSC clusters from our data in (A) human and (B) mouse spermatogonia from the Mammalian Reproductive Genetics Database (<https://orit.research.bcm.edu/MRGDv2>). Red denotes high abundance; white is low abundance. The columns are datasets and the rows are genes.
