# Supplementary material for: Conserved Transcriptome Features Define Prepubertal Primate Spermatogonial Stem Cells as Adark Spermatogonia and Identify Unique Regulators
Source: Int J Mol Sci. 2023 Mar 1;24(5):4755. doi: 10.3390/ijms24054755 (PMC10002546; doi:10.3390/ijms24054755)
Supplement: Supplementary file 1 [file ijms-24-04755-s001.zip › Table S2.xlsx]

## Sheet: Fig. 1A - Baboon
	p_val	avg_logFC	pct.1	pct.2	p_val_adj	cluster	gene
IGFBP3	0	2.56572	0.867	0.106	0	0	IGFBP3
DCN	0	2.33777	0.968	0.152	0	0	DCN
C7	0	2.25174	0.838	0.116	0	0	C7
IGF2	0	2.11257	0.861	0.133	0	0	IGF2
RARRES2	0	2.09417	0.809	0.11	0	0	RARRES2
COL1A1	0	1.98353	0.796	0.128	0	0	COL1A1
MGP	0	1.96388	0.673	0.076	0	0	MGP
COL3A1	0	1.9544	0.769	0.126	0	0	COL3A1
COL1A2	0	1.8361	0.743	0.1	0	0	COL1A2
FXYD1	0	1.75773	0.685	0.093	0	0	FXYD1
S100A6	0	1.71622	0.448	0.047	0	0	S100A6
IER2	0	1.70697	0.464	0.134	0	0	IER2
OLFML3	0	1.67739	0.639	0.076	0	0	OLFML3
LOC101001096	0	1.65803	0.579	0.068	0	0	LOC101001096
CLEC3B	0	1.65705	0.367	0.041	0	0	CLEC3B
IGFBP6	0	1.6345	0.411	0.055	0	0	IGFBP6
COL6A2	0	1.62474	0.63	0.083	0	0	COL6A2
LHFPL6	0	1.5763	0.527	0.062	0	0	LHFPL6
COL6A1	0	1.52776	0.591	0.073	0	0	COL6A1
IGFBP4	0	1.52602	0.733	0.146	0	0	IGFBP4
DPT	0	1.51982	0.514	0.061	0	0	DPT
INHBA	0	1.49565	0.45	0.056	0	0	INHBA
PMP22	0	1.49523	0.523	0.067	0	0	PMP22
NTRK2	0	1.49294	0.489	0.052	0	0	NTRK2
NR2F2	0	1.43366	0.583	0.103	0	0	NR2F2
LOC101026740	0	1.42364	0.443	0.053	0	0	LOC101026740
IGFBP5	0	1.36657	0.674	0.301	0	0	IGFBP5
LGALS1	0	1.34956	0.69	0.264	0	0	LGALS1
NRK	0	1.342	0.513	0.076	0	0	NRK
LTBP4	0	1.30539	0.463	0.097	0	0	LTBP4
SELENOP	0	1.27603	0.677	0.297	0	0	SELENOP
DHRS2	0	1.27549	0.428	0.06	0	0	DHRS2
C1S	0	1.27332	0.386	0.041	0	0	C1S
ITM2A	0	1.25922	0.387	0.043	0	0	ITM2A
EPHX1	0	1.23996	0.47	0.117	0	0	EPHX1
SERPINE2	0	1.22915	0.595	0.272	0	0	SERPINE2
CPE	0	1.22295	0.338	0.043	0	0	CPE
TCF21	0	1.22238	0.426	0.061	0	0	TCF21
TGFBR3	0	1.21365	0.441	0.088	0	0	TGFBR3
CDKN1C	0	1.21226	0.339	0.043	0	0	CDKN1C
LOC101000083	0	1.19352	0.527	0.155	0	0	LOC101000083
LOC116269945	0	1.19204	0.546	0.282	0	0	LOC116269945
PLPP3	0	1.18749	0.379	0.072	0	0	PLPP3
ANGPTL1	0	1.17557	0.333	0.056	0	0	ANGPTL1
CAVIN2	0	1.17382	0.353	0.037	0	0	CAVIN2
GSN	0	1.16718	0.357	0.067	0	0	GSN
ADIRF	0	1.16704	0.497	0.17	0	0	ADIRF
LOC116273624	0	1.16405	0.746	0.492	0	0	LOC116273624
CALD1	0	1.15369	0.618	0.233	0	0	CALD1
LOC101009229	0	1.15133	0.337	0.048	0	0	LOC101009229
NUPR1	0	1.15109	0.398	0.086	0	0	NUPR1
SOCS3	0	1.1303	0.29	0.049	0	0	SOCS3
TSHZ2	0	1.12765	0.454	0.077	0	0	TSHZ2
HSPB1	0	1.12459	0.434	0.153	0	0	HSPB1
CTSC	0	1.12118	0.436	0.178	0	0	CTSC
EBF1	0	1.11898	0.386	0.064	0	0	EBF1
FOS	0	1.1179	0.814	0.666	0	0	FOS
JUN	0	1.11774	0.899	0.77	0	0	JUN
NDRG2	0	1.10384	0.377	0.066	0	0	NDRG2
RSPO3	0	1.08883	0.271	0.02	0	0	RSPO3
LHX9	0	1.08872	0.299	0.032	0	0	LHX9
COL14A1	0	1.08808	0.263	0.023	0	0	COL14A1
IGFBP7	0	1.06895	0.688	0.153	0	0	IGFBP7
LOC116273623	0	1.06434	0.695	0.461	0	0	LOC116273623
MFAP4	0	1.04877	0.29	0.033	0	0	MFAP4
OGN	0	1.03807	0.267	0.022	0	0	OGN
HTRA3	0	1.02956	0.338	0.05	0	0	HTRA3
NBL1	0	1.02814	0.441	0.169	0	0	NBL1
SOD3	0	1.02585	0.324	0.063	0	0	SOD3
MDK	0	1.01596	0.298	0.067	0	0	MDK
BTG1	0	1.00568	0.724	0.5	0	0	BTG1
COL5A1	0	0.992357	0.283	0.038	0	0	COL5A1
SELENOM	0	0.990008	0.581	0.303	0	0	SELENOM
AHNAK	0	0.973705	0.311	0.056	0	0	AHNAK
LOC101014578	0	0.967526	0.253	0.028	0	0	LOC101014578
EMP3	0	0.953443	0.534	0.28	0	0	EMP3
SFRP1	0	0.952192	0.264	0.064	0	0	SFRP1
APOD	0	0.948426	0.368	0.063	0	0	APOD
RND3	0	0.937234	0.274	0.052	0	0	RND3
MMP2	0	0.934491	0.373	0.133	0	0	MMP2
ROBO1	0	0.921348	0.285	0.073	0	0	ROBO1
ZBTB16	0	0.917362	0.257	0.042	0	0	ZBTB16
COL15A1	0	0.914099	0.387	0.084	0	0	COL15A1
RBMS3	0	0.907151	0.266	0.046	0	0	RBMS3
FUOM	0	0.905783	0.283	0.05	0	0	FUOM
LOC101023625	0	0.894008	0.967	0.874	0	0	LOC101023625
CD81	0	0.888678	0.868	0.679	0	0	CD81
TMSB4X	0	0.873399	0.793	0.38	0	0	TMSB4X
VIM	0	0.838611	0.887	0.741	0	0	VIM
GNG11	0	0.666709	0.281	0.061	0	0	GNG11
LOC108581881	0	0.610139	0.996	0.901	0	0	LOC108581881
SSPN	1.48515e-301	0.836617	0.278	0.076	3.24163e-297	0	SSPN
RPL10	2.45318e-301	0.321685	0.993	0.982	5.35455e-297	0	RPL10
JUND	5.16426e-298	1.20429	0.683	0.504	1.1272e-293	0	JUND
TMEM176A	2.02031e-296	0.964835	0.342	0.12	4.40972e-292	0	TMEM176A
CEBPD	9.53908e-295	0.970107	0.342	0.116	2.0821e-290	0	CEBPD
NOVA1	2.49646e-293	1.02076	0.415	0.178	5.44902e-289	0	NOVA1
NECAB1	1.87444e-269	0.88235	0.292	0.093	4.09133e-265	0	NECAB1
LOC100997115	1.74135e-265	0.577852	0.894	0.809	3.80085e-261	0	LOC100997115
ANXA5	8.07949e-263	0.866322	0.478	0.252	1.76351e-258	0	ANXA5
TPM2	6.49812e-261	0.720477	0.319	0.111	1.41835e-256	0	TPM2
LOC101023645	5.53707e-253	0.874118	0.343	0.134	1.20858e-248	0	LOC101023645
SERPINH1	1.39696e-252	0.894899	0.371	0.155	3.04914e-248	0	SERPINH1
KLF2	7.26281e-242	1.04827	0.596	0.413	1.58525e-237	0	KLF2
PRKG1	3.27452e-237	0.830635	0.272	0.09	7.1473e-233	0	PRKG1
MEST	6.86931e-235	0.899526	0.343	0.141	1.49936e-230	0	MEST
FCGRT	1.75003e-227	0.712011	0.628	0.46	3.81978e-223	0	FCGRT
LOC101001661	8.33141e-216	0.793187	0.428	0.217	1.8185e-211	0	LOC101001661
PPIC	2.15485e-215	0.879874	0.355	0.162	4.70339e-211	0	PPIC
TSC22D1	4.4031e-212	0.907581	0.521	0.341	9.61064e-208	0	TSC22D1
LOC108586075	5.73024e-212	0.78596	0.553	0.376	1.25074e-207	0	LOC108586075
TMEM176B	4.80401e-204	0.845193	0.45	0.258	1.04857e-199	0	TMEM176B
PTMS	8.59254e-204	0.557089	0.749	0.657	1.87549e-199	0	PTMS
TIMP1	3.1082e-202	0.606859	0.662	0.46	6.78427e-198	0	TIMP1
LOC101005729	6.39909e-199	0.733938	0.263	0.094	1.39673e-194	0	LOC101005729
RPL24	8.7127e-188	0.288769	0.967	0.947	1.90172e-183	0	RPL24
LOC108583864	8.44725e-177	0.591844	0.509	0.27	1.84378e-172	0	LOC108583864
EVA1B	1.30163e-171	0.78846	0.395	0.219	2.84106e-167	0	EVA1B
ZFP36L1	2.55162e-161	0.676479	0.598	0.466	5.56941e-157	0	ZFP36L1
TSC22D3	4.30103e-159	0.752367	0.526	0.381	9.38787e-155	0	TSC22D3
UBC	3.44751e-154	0.395358	0.909	0.895	7.52489e-150	0	UBC
JUNB	3.93581e-151	0.696801	0.778	0.666	8.5907e-147	0	JUNB
RHOB	9.95077e-148	0.885239	0.542	0.402	2.17195e-143	0	RHOB
CITED2	7.30964e-140	1.00773	0.344	0.193	1.59547e-135	0	CITED2
LOC101021565	6.5028e-137	0.692948	0.371	0.212	1.41937e-132	0	LOC101021565
NENF	5.73418e-136	0.638961	0.518	0.391	1.2516e-131	0	NENF
SEC62	4.23926e-118	0.445032	0.653	0.575	9.25302e-114	0	SEC62
EIF1	1.29111e-116	0.286949	0.918	0.903	2.81811e-112	0	EIF1
PGRMC1	1.55012e-116	0.637164	0.271	0.135	3.38345e-112	0	PGRMC1
LOC101020479	1.11396e-114	0.709211	0.497	0.384	2.43144e-110	0	LOC101020479
ZFP36	2.55167e-114	0.919008	0.317	0.178	5.56952e-110	0	ZFP36
SERF2	9.4952e-112	0.308664	0.877	0.849	2.07252e-107	0	SERF2
IFI16	3.75965e-109	0.658134	0.325	0.188	8.20618e-105	0	IFI16
ECRG4	2.27342e-107	0.771284	0.328	0.197	4.96219e-103	0	ECRG4
LOC101023791	3.9507e-107	0.630295	0.479	0.374	8.62319e-103	0	LOC101023791
HTRA1	3.63694e-103	0.687794	0.311	0.183	7.93836e-99	0	HTRA1
GAPDH	2.19138e-101	0.440398	0.66	0.598	4.78312e-97	0	GAPDH
RABAC1	3.10152e-99	0.628064	0.439	0.329	6.76969e-95	0	RABAC1
MAGED2	3.85482e-98	0.53106	0.561	0.479	8.41391e-94	0	MAGED2
CD63	2.78484e-94	0.397876	0.682	0.644	6.07847e-90	0	CD63
LOC101026205	9.66764e-82	0.298187	0.797	0.777	2.11016e-77	0	LOC101026205
MAGEH1	1.20917e-68	0.568056	0.326	0.226	2.63926e-64	0	MAGEH1
SPTBN1	5.44836e-66	0.526375	0.458	0.384	1.18921e-61	0	SPTBN1
ABHD14A	9.21682e-65	0.56553	0.266	0.169	2.01176e-60	0	ABHD14A
MFGE8	2.33527e-64	0.555	0.252	0.155	5.09719e-60	0	MFGE8
NPDC1	2.6943e-63	0.572828	0.273	0.177	5.88085e-59	0	NPDC1
EGR1	5.46902e-63	0.413957	0.633	0.543	1.19372e-58	0	EGR1
MTARC2	5.82491e-62	0.588289	0.293	0.201	1.2714e-57	0	MTARC2
LOC101026647	1.11536e-61	0.432787	0.544	0.489	2.4345e-57	0	LOC101026647
FKBP7	2.1422e-61	0.529731	0.253	0.157	4.67578e-57	0	FKBP7
NME3	3.07076e-60	0.535	0.396	0.317	6.70255e-56	0	NME3
ANG	3.89307e-58	0.534325	0.412	0.342	8.49741e-54	0	ANG
TUBB	1.16306e-55	0.349043	0.635	0.624	2.53861e-51	0	TUBB
PEG3	2.54802e-53	0.54521	0.415	0.349	5.56156e-49	0	PEG3
APOC1	4.27062e-52	0.636827	0.485	0.45	9.32148e-48	0	APOC1
ARL6IP5	3.12915e-51	0.493345	0.418	0.36	6.82999e-47	0	ARL6IP5
BCL7C	2.92031e-46	0.536157	0.262	0.187	6.37417e-42	0	BCL7C
NSA2	6.42982e-44	0.336404	0.615	0.598	1.40344e-39	0	NSA2
GADD45B	5.11477e-43	0.686433	0.294	0.217	1.1164e-38	0	GADD45B
FOSB	6.8007e-38	0.426589	0.443	0.391	1.48439e-33	0	FOSB
SEPTIN7	9.13099e-38	0.365126	0.509	0.493	1.99302e-33	0	SEPTIN7
SPCS1	6.99243e-33	0.354915	0.503	0.501	1.52624e-28	0	SPCS1
DBP	2.23123e-32	0.484547	0.314	0.262	4.8701e-28	0	DBP
HSP90B1	2.0649e-30	0.329365	0.551	0.549	4.50706e-26	0	HSP90B1
NDN	7.94463e-28	0.407325	0.404	0.378	1.73407e-23	0	NDN
MPZL1	1.17349e-27	0.444733	0.329	0.285	2.56138e-23	0	MPZL1
SMDT1	1.9158e-27	0.333648	0.484	0.481	4.18161e-23	0	SMDT1
TTC3	2.53887e-27	0.444032	0.263	0.21	5.54159e-23	0	TTC3
CKB	2.12851e-26	0.510214	0.259	0.208	4.64589e-22	0	CKB
LOC103886865	1.67986e-22	0.253032	0.614	0.643	3.66663e-18	0	LOC103886865
LOC100999318	2.28017e-22	0.292766	0.447	0.435	4.97694e-18	0	LOC100999318
ZRANB2	2.36989e-22	0.35792	0.409	0.391	5.17276e-18	0	ZRANB2
LOC116272953	1.70217e-21	0.287841	0.405	0.372	3.71532e-17	0	LOC116272953
SQSTM1	4.44868e-21	0.412201	0.335	0.309	9.71013e-17	0	SQSTM1
LOC103879121	8.99816e-21	0.435868	0.29	0.256	1.96403e-16	0	LOC103879121
RNASET2	2.00908e-20	0.334057	0.383	0.367	4.38522e-16	0	RNASET2
G0S2	3.51015e-20	0.470768	0.261	0.221	7.6616e-16	0	G0S2
TMEM256	5.04623e-20	0.415562	0.33	0.305	1.10144e-15	0	TMEM256
TPI1	5.13788e-18	0.318571	0.452	0.461	1.12144e-13	0	TPI1
PEG10	5.83068e-18	0.372188	0.336	0.309	1.27266e-13	0	PEG10
SARAF	2.69051e-17	0.29607	0.442	0.447	5.87258e-13	0	SARAF
SRP9	7.69279e-14	0.32135	0.393	0.398	1.67911e-09	0	SRP9
RWDD1	3.1753e-13	0.318946	0.393	0.398	6.93073e-09	0	RWDD1
PJA2	3.38973e-13	0.373967	0.274	0.253	7.39877e-09	0	PJA2
LOC103880252	1.28427e-12	0.404766	0.276	0.258	2.80317e-08	0	LOC103880252
DYNC1I2	4.15992e-11	0.344912	0.338	0.336	9.07986e-07	0	DYNC1I2
IP6K2	4.23975e-11	0.37316	0.356	0.361	9.2541e-07	0	IP6K2
CTSL	1.77252e-09	0.355666	0.279	0.269	3.86888e-05	0	CTSL
NFIA	6.68721e-09	0.258966	0.422	0.441	0.000145962	0	NFIA
IMPDH2	2.63162e-08	0.342631	0.264	0.253	0.000574403	0	IMPDH2
PDLIM2	2.88788e-07	0.311419	0.287	0.287	0.00630338	0	PDLIM2
RNMT	3.44475e-07	0.290039	0.324	0.333	0.00751886	0	RNMT
NSMCE3	2.12739e-05	0.336256	0.282	0.292	0.464346	0	NSMCE3
LOC101015786	2.23028e-05	0.284781	0.337	0.357	0.486804	0	LOC101015786
C12H11orf96	5.81119e-05	0.33534	0.373	0.363	1	0	C12H11orf96
SYPL1	0.00012787	0.310028	0.252	0.257	1	0	SYPL1
POLR2K	0.000270815	0.280835	0.326	0.352	1	0	POLR2K
OGT	0.000914027	0.287009	0.249	0.253	1	0	OGT
TCEA1	0.00120033	0.286319	0.274	0.289	1	0	TCEA1
LMAN1	0.00232863	0.295461	0.245	0.256	1	0	LMAN1
AMH	0	0.578266	0.989	0.822	0	1	AMH
LOC101008159	1.48281e-186	0.43531	0.755	0.458	3.23654e-182	1	LOC101008159
SYNE2	1.35037e-184	0.382562	0.828	0.555	2.94745e-180	1	SYNE2
GAS6	9.28814e-168	0.361858	0.898	0.697	2.02732e-163	1	GAS6
PMEL	2.10595e-162	0.420316	0.615	0.354	4.59666e-158	1	PMEL
ATP1B1	2.46968e-158	0.345344	0.866	0.626	5.39057e-154	1	ATP1B1
PLA2G1B	9.59001e-156	0.330563	0.928	0.789	2.09321e-151	1	PLA2G1B
MYO6	6.60804e-149	0.380064	0.582	0.331	1.44234e-144	1	MYO6
KTN1	1.46926e-143	0.327326	0.881	0.652	3.20695e-139	1	KTN1
LSR	1.51201e-137	0.366611	0.659	0.403	3.30027e-133	1	LSR
INHA	4.12344e-137	0.35976	0.775	0.519	9.00024e-133	1	INHA
IGFBP2	4.05656e-134	0.392373	0.733	0.515	8.85424e-130	1	IGFBP2
LOC116271724	3.46237e-127	0.345257	0.502	0.277	7.55732e-123	1	LOC116271724
CTSV	1.82945e-120	0.357447	0.563	0.342	3.99314e-116	1	CTSV
SLC25A29	5.64015e-120	0.340473	0.483	0.268	1.23108e-115	1	SLC25A29
CTNND1	2.5374e-118	0.332731	0.546	0.323	5.53839e-114	1	CTNND1
SERINC5	7.15398e-114	0.330162	0.571	0.343	1.5615e-109	1	SERINC5
ADGRG1	2.97838e-113	0.332017	0.519	0.302	6.5009e-109	1	ADGRG1
DDX24	1.30862e-111	0.310573	0.766	0.555	2.85633e-107	1	DDX24
SRSF11	1.46877e-110	0.28023	0.916	0.712	3.20587e-106	1	SRSF11
BCAM	6.46707e-105	0.315929	0.706	0.476	1.41157e-100	1	BCAM
MBOAT7	3.59666e-104	0.314517	0.503	0.295	7.85043e-100	1	MBOAT7
AMHR2	1.69897e-103	0.301933	0.498	0.29	3.70834e-99	1	AMHR2
CHD6	4.18423e-103	0.283578	0.578	0.352	9.13293e-99	1	CHD6
GLB1L3	7.67361e-103	0.338633	0.499	0.296	1.67492e-98	1	GLB1L3
BSG	1.09942e-101	0.286812	0.802	0.611	2.3997e-97	1	BSG
BBX	9.90294e-101	0.308946	0.702	0.48	2.16151e-96	1	BBX
SORL1	1.03399e-99	0.314312	0.475	0.278	2.25689e-95	1	SORL1
C3H4orf48	1.26077e-99	0.269582	0.839	0.623	2.75187e-95	1	C3H4orf48
FHOD3	1.55528e-99	0.277782	0.374	0.198	3.39472e-95	1	FHOD3
DDX17	1.38706e-96	0.263434	0.903	0.698	3.02754e-92	1	DDX17
SRSF10	5.05913e-96	0.298397	0.651	0.439	1.10426e-91	1	SRSF10
PWWP3B	5.32055e-95	0.266497	0.58	0.361	1.16132e-90	1	PWWP3B
MBNL3	7.10801e-95	0.282719	0.45	0.259	1.55147e-90	1	MBNL3
TANC2	2.25297e-94	0.296034	0.376	0.206	4.91756e-90	1	TANC2
SOX9	5.26704e-94	0.282718	0.572	0.357	1.14964e-89	1	SOX9
SERPINA5	7.37374e-94	0.300188	0.573	0.363	1.60947e-89	1	SERPINA5
GPC1	8.71193e-94	0.297614	0.526	0.321	1.90155e-89	1	GPC1
SLC39A4	4.80763e-93	0.273669	0.782	0.563	1.04936e-88	1	SLC39A4
SCML1	5.34409e-92	0.260885	0.686	0.461	1.16646e-87	1	SCML1
DCLK1	5.76605e-92	0.266078	0.422	0.238	1.25856e-87	1	DCLK1
BRICD5	1.41871e-90	0.271077	0.341	0.179	3.09662e-86	1	BRICD5
GET4	1.73078e-90	0.268223	0.542	0.337	3.77778e-86	1	GET4
ZMAT1	2.12855e-90	0.282277	0.301	0.152	4.64598e-86	1	ZMAT1
LGR4	2.361e-90	0.259871	0.398	0.22	5.15335e-86	1	LGR4
CDH2	2.91198e-90	0.274136	0.38	0.21	6.35598e-86	1	CDH2
SRGAP1	1.31612e-88	0.26788	0.393	0.221	2.87269e-84	1	SRGAP1
LUC7L3	1.72922e-88	0.2735	0.8	0.578	3.77437e-84	1	LUC7L3
ESPN	2.55144e-88	0.279862	0.407	0.231	5.56902e-84	1	ESPN
RAD21	1.3274e-87	0.274208	0.688	0.47	2.89732e-83	1	RAD21
FAM20C	2.53077e-87	0.257173	0.397	0.224	5.52391e-83	1	FAM20C
ITGA6	3.23598e-86	0.26456	0.403	0.232	7.06318e-82	1	ITGA6
LOC101005461	1.13602e-85	0.262662	0.701	0.489	2.47959e-81	1	LOC101005461
HLTF	1.90014e-85	0.269066	0.692	0.498	4.14743e-81	1	HLTF
INHBB	3.31283e-85	0.289225	0.421	0.245	7.23091e-81	1	INHBB
CTNNAL1	3.46914e-84	0.291881	0.582	0.391	7.5721e-80	1	CTNNAL1
PDIA3	2.28665e-83	0.288363	0.783	0.589	4.99107e-79	1	PDIA3
PLXNC1	2.49522e-83	0.252499	0.296	0.153	5.44631e-79	1	PLXNC1
SPINT2	3.07105e-83	0.267526	0.749	0.569	6.70318e-79	1	SPINT2
KIF5B	8.62279e-82	0.261838	0.687	0.484	1.8821e-77	1	KIF5B
LOC103881065	1.13925e-81	0.279254	0.593	0.399	2.48665e-77	1	LOC103881065
JCAD	1.72921e-78	0.262456	0.413	0.245	3.77435e-74	1	JCAD
USP11	1.97242e-77	0.254611	0.539	0.345	4.30519e-73	1	USP11
CXXC5	9.83362e-77	0.251783	0.526	0.34	2.14638e-72	1	CXXC5
LOC101015920	1.01955e-76	0.253384	0.397	0.232	2.22537e-72	1	LOC101015920
SMC6	2.64231e-75	0.256281	0.503	0.322	5.76738e-71	1	SMC6
EZR	6.57962e-75	0.257576	0.439	0.27	1.43613e-70	1	EZR
SERPINF1	7.53035e-75	0.258462	0.485	0.304	1.64365e-70	1	SERPINF1
APOA1	3.61353e-74	0.259964	0.63	0.445	7.88726e-70	1	APOA1
PSAP	3.76545e-74	0.256359	0.825	0.631	8.21885e-70	1	PSAP
ISYNA1	1.216e-73	0.251076	0.721	0.525	2.65416e-69	1	ISYNA1
LOC101014155	2.81165e-61	0.261922	0.256	0.139	6.13699e-57	1	LOC101014155
JUNB1	0	0.709857	0.954	0.64	0	2	JUNB
2023-06-01	0	0.685983	0.995	0.756	0	2	JUN
FOS1	0	0.604408	0.954	0.646	0	2	FOS
DUSP1	2.81338e-249	0.66719	0.644	0.364	6.14076e-245	2	DUSP1
AMH1	1.62146e-245	0.444899	0.929	0.832	3.53915e-241	2	AMH
FOSB1	1.34349e-214	0.540388	0.635	0.362	2.93244e-210	2	FOSB
EGR11	8.94871e-201	0.437565	0.817	0.515	1.95323e-196	2	EGR1
GADD45G	7.10515e-185	0.777333	0.639	0.422	1.55084e-180	2	GADD45G
DDX5	5.08931e-175	0.463189	0.813	0.627	1.11084e-170	2	DDX5
MCL1	3.88696e-165	0.517331	0.599	0.375	8.48406e-161	2	MCL1
SRSF111	1.5246e-160	0.370541	0.883	0.717	3.32774e-156	2	SRSF11
DDX171	5.84453e-147	0.358064	0.872	0.703	1.27569e-142	2	DDX17
SYNE21	2.46849e-138	0.369996	0.774	0.564	5.38797e-134	2	SYNE2
GLB1L31	6.92191e-133	0.484152	0.501	0.296	1.51085e-128	2	GLB1L3
LOC1085818811	1.7945e-127	0.267095	1	0.902	3.91686e-123	2	LOC108581881
RAD211	1.15562e-116	0.406027	0.662	0.474	2.52238e-112	2	RAD21
KTN11	6.71263e-114	0.321396	0.83	0.661	1.46517e-109	2	KTN1
KMT2C	1.32454e-99	0.367191	0.563	0.38	2.89107e-95	2	KMT2C
TRA2B	1.196e-98	0.374617	0.667	0.496	2.6105e-94	2	TRA2B
MYO61	2.73226e-98	0.365117	0.522	0.34	5.96371e-94	2	MYO6
LIMCH1	2.55564e-96	0.389823	0.484	0.307	5.57819e-92	2	LIMCH1
LOC1010081591	1.66805e-94	0.329803	0.661	0.473	3.64085e-90	2	LOC101008159
CCN1	3.175e-93	0.537914	0.339	0.189	6.93006e-89	2	CCN1
SERINC51	4.73381e-92	0.36455	0.523	0.351	1.03325e-87	2	SERINC5
SCML11	9.08596e-91	0.323651	0.648	0.467	1.98319e-86	2	SCML1
LOC101007228	5.05102e-88	0.283697	0.902	0.868	1.10249e-83	2	LOC101007228
PSAP1	1.97666e-87	0.296931	0.778	0.639	4.31446e-83	2	PSAP
KIF5B1	1.16415e-86	0.336265	0.653	0.49	2.54098e-82	2	KIF5B
PMEL1	1.72603e-85	0.356106	0.541	0.366	3.76741e-81	2	PMEL
PDIA31	2.75865e-83	0.300369	0.745	0.595	6.02131e-79	2	PDIA3
LOC1162717241	6.75268e-80	0.34724	0.447	0.286	1.47391e-75	2	LOC116271724
SPTAN1	1.68168e-79	0.353146	0.484	0.328	3.67059e-75	2	SPTAN1
SORL11	2.69431e-79	0.325958	0.442	0.283	5.88087e-75	2	SORL1
MAP1B	9.04825e-75	0.32923	0.517	0.358	1.97496e-70	2	MAP1B
SRSF101	1.51274e-74	0.320435	0.608	0.446	3.30186e-70	2	SRSF10
CTNND11	1.59681e-73	0.334435	0.487	0.333	3.48536e-69	2	CTNND1
KLF21	2.28168e-73	0.415918	0.58	0.417	4.98023e-69	2	KLF2
LOC101004146	1.07885e-72	0.418916	0.479	0.327	2.3548e-68	2	LOC101004146
APP	1.96439e-71	0.287436	0.652	0.5	4.28767e-67	2	APP
SRSF7	7.47085e-71	0.329811	0.637	0.489	1.63066e-66	2	SRSF7
ATP1B11	6.07361e-70	0.262936	0.774	0.641	1.32569e-65	2	ATP1B1
PWWP3B1	6.20171e-69	0.311137	0.526	0.37	1.35365e-64	2	PWWP3B
LGR41	8.00584e-67	0.302235	0.363	0.226	1.74743e-62	2	LGR4
RUFY3	7.39911e-66	0.2809	0.547	0.396	1.615e-61	2	RUFY3
INHBB1	8.22042e-66	0.301637	0.39	0.25	1.79427e-61	2	INHBB
ZBTB20	3.01213e-65	0.286797	0.616	0.467	6.57457e-61	2	ZBTB20
ESPN1	2.01118e-64	0.294476	0.374	0.236	4.3898e-60	2	ESPN
SOX4	2.06666e-64	0.310075	0.651	0.51	4.51089e-60	2	SOX4
TNRC6B	2.49469e-64	0.269976	0.618	0.466	5.44515e-60	2	TNRC6B
FHOD1	5.52501e-64	0.311565	0.304	0.179	1.20594e-59	2	FHOD1
CHD61	2.28975e-60	0.287502	0.508	0.363	4.99784e-56	2	CHD6
JCAD1	4.25542e-59	0.271532	0.385	0.25	9.2883e-55	2	JCAD
BBX1	6.2872e-59	0.262986	0.629	0.492	1.37231e-54	2	BBX
RHOB1	2.12748e-58	0.373231	0.546	0.403	4.64365e-54	2	RHOB
USP13	5.59145e-58	0.284978	0.35	0.223	1.22045e-53	2	USP13
AKAP9	1.01305e-57	0.265634	0.58	0.44	2.21119e-53	2	AKAP9
SMC61	1.69565e-57	0.285058	0.466	0.328	3.7011e-53	2	SMC6
SLC26A2	4.90534e-57	0.291936	0.329	0.207	1.07069e-52	2	SLC26A2
LOC1010159201	5.20431e-57	0.277601	0.366	0.237	1.13594e-52	2	LOC101015920
FMNL2	3.89964e-56	0.290674	0.34	0.218	8.51175e-52	2	FMNL2
DSP	1.40535e-55	0.270275	0.29	0.175	3.06746e-51	2	DSP
CGNL1	3.2852e-55	0.301721	0.303	0.188	7.17061e-51	2	CGNL1
SOX91	1.26111e-54	0.294568	0.502	0.368	2.75263e-50	2	SOX9
MBOAT71	2.55496e-54	0.274858	0.441	0.306	5.5767e-50	2	MBOAT7
ITGA61	2.48638e-53	0.268565	0.364	0.238	5.42703e-49	2	ITGA6
DNAJB1	1.67345e-52	0.31467	0.297	0.186	3.65264e-48	2	DNAJB1
UPF2	2.22738e-52	0.268059	0.551	0.417	4.8617e-48	2	UPF2
SLC25A291	3.10378e-52	0.275166	0.408	0.28	6.77463e-48	2	SLC25A29
SERINC1	6.89534e-51	0.258557	0.458	0.329	1.50505e-46	2	SERINC1
ERBB3	5.95252e-50	0.278918	0.294	0.184	1.29926e-45	2	ERBB3
CELF1	2.23751e-49	0.269919	0.421	0.298	4.88382e-45	2	CELF1
TANC21	4.50764e-49	0.260855	0.329	0.213	9.83883e-45	2	TANC2
LOC1038810651	1.22135e-48	0.261276	0.542	0.407	2.66585e-44	2	LOC103881065
IGF1R	1.67996e-48	0.250737	0.368	0.247	3.66684e-44	2	IGF1R
DAAM1	4.72489e-47	0.254985	0.333	0.219	1.0313e-42	2	DAAM1
CDK6	5.6078e-46	0.27197	0.327	0.217	1.22401e-41	2	CDK6
GPC11	7.91917e-46	0.251965	0.456	0.332	1.72852e-41	2	GPC1
LOC101014153	2.60694e-44	0.253801	0.297	0.191	5.69017e-40	2	LOC101014153
CLK1	9.8171e-42	0.261088	0.377	0.266	2.14278e-37	2	CLK1
LOC101010494	3.32237e-41	0.268198	0.428	0.314	7.25173e-37	2	LOC101010494
PNMA1	3.64071e-41	0.271284	0.375	0.264	7.94658e-37	2	PNMA1
GADD45B1	1.69106e-30	0.272463	0.304	0.216	3.69107e-26	2	GADD45B
NR4A1	2.63051e-23	0.271898	0.255	0.183	5.74162e-19	2	NR4A1
RPL31	0	0.872655	0.886	0.678	0	3	RPL31
RPS20	0	0.845914	0.946	0.817	0	3	RPS20
RPL23A	0	0.768591	0.98	0.903	0	3	RPL23A
LOC108586804	0	0.760717	0.9	0.684	0	3	LOC108586804
RPL27A	0	0.75007	0.972	0.877	0	3	RPL27A
RPS27	0	0.740737	0.997	0.972	0	3	RPS27
RPL35	0	0.687444	0.991	0.965	0	3	RPL35
RPLP2	0	0.682043	0.995	0.957	0	3	RPLP2
RPS3	0	0.680538	0.973	0.887	0	3	RPS3
RPL17	0	0.676568	0.985	0.933	0	3	RPL17
LOC103876796	0	0.674711	0.998	0.977	0	3	LOC103876796
RPL13A	0	0.674444	0.991	0.964	0	3	RPL13A
RPL28	0	0.673338	0.998	0.97	0	3	RPL28
RPL21	0	0.669491	0.992	0.959	0	3	RPL21
RPS14	0	0.666157	0.994	0.967	0	3	RPS14
TPT1	0	0.665721	1	0.987	0	3	TPT1
RPL7	0	0.645487	0.98	0.907	0	3	RPL7
RPL27	0	0.640991	0.993	0.945	0	3	RPL27
LOC116268820	0	0.635507	0.991	0.926	0	3	LOC116268820
TOMM7	0	0.635396	0.957	0.808	0	3	TOMM7
RACK1	0	0.632604	0.945	0.808	0	3	RACK1
PRDX6	0	0.62186	0.919	0.684	0	3	PRDX6
RPS29	0	0.617352	1	0.993	0	3	RPS29
RPL3	0	0.607904	0.996	0.955	0	3	RPL3
RPS13	0	0.59243	0.999	0.976	0	3	RPS13
RPL32	0	0.569186	0.946	0.8	0	3	RPL32
RPS25	0	0.549338	0.977	0.888	0	3	RPS25
RPL10A	0	0.54331	0.988	0.931	0	3	RPL10A
LOC101003493	0	0.542872	1	0.986	0	3	LOC101003493
RPS4Y1	0	0.541759	0.971	0.867	0	3	RPS4Y1
RPL9	0	0.536036	0.993	0.964	0	3	RPL9
RPS5	0	0.530681	0.957	0.837	0	3	RPS5
RPLP1	0	0.529035	1	0.992	0	3	RPLP1
RPS8	0	0.517543	1	0.988	0	3	RPS8
RPL23	0	0.517408	1	0.993	0	3	RPL23
RPL14	0	0.512381	0.988	0.91	0	3	RPL14
RPL34	0	0.502494	1	0.989	0	3	RPL34
RPL22	0	0.499413	0.989	0.94	0	3	RPL22
RPS24	0	0.496273	0.998	0.967	0	3	RPS24
RPS26	0	0.494512	0.995	0.975	0	3	RPS26
RPL8	0	0.487389	0.998	0.96	0	3	RPL8
RPL37A	0	0.482049	1	0.988	0	3	RPL37A
RPL13	0	0.477421	0.991	0.955	0	3	RPL13
ZC3H10	0	0.477393	1	0.996	0	3	ZC3H10
LOC108584677	0	0.468236	0.993	0.943	0	3	LOC108584677
RPS18	0	0.467055	1	0.997	0	3	RPS18
LOC101014662	0	0.460496	0.998	0.983	0	3	LOC101014662
UBA52	0	0.456579	0.988	0.935	0	3	UBA52
RPL36	0	0.440314	0.997	0.969	0	3	RPL36
RPS10	0	0.438069	0.996	0.958	0	3	RPS10
RPL37	0	0.437077	0.999	0.987	0	3	RPL37
RPL38	0	0.433321	0.999	0.993	0	3	RPL38
RPL19	0	0.432825	0.996	0.965	0	3	RPL19
RPS19	0	0.418012	0.999	0.989	0	3	RPS19
RPS12	0	0.415306	1	0.983	0	3	RPS12
RPLP0	0	0.414623	0.982	0.922	0	3	RPLP0
RPL18	0	0.39718	0.999	0.986	0	3	RPL18
RPS9	0	0.38212	0.999	0.98	0	3	RPS9
FAU	0	0.368797	0.992	0.946	0	3	FAU
RPL7A	0	0.364372	0.996	0.971	0	3	RPL7A
RPS7	0	0.360361	0.999	0.971	0	3	RPS7
RPS28	0	0.350639	0.998	0.982	0	3	RPS28
RPL101	0	0.348531	0.998	0.982	0	3	RPL10
RPS23	1.63514e-306	0.315726	0.999	0.979	3.56902e-302	3	RPS23
RPL5	1.70036e-304	0.434419	0.979	0.899	3.71138e-300	3	RPL5
RPL15	4.64254e-297	0.384942	0.985	0.931	1.01333e-292	3	RPL15
RPS2	1.24616e-296	0.48675	0.953	0.851	2.71999e-292	3	RPS2
LOC101012602	1.19046e-273	0.491602	0.946	0.754	2.59842e-269	3	LOC101012602
LOC101006882	4.49373e-273	0.506919	0.919	0.771	9.80848e-269	3	LOC101006882
RPSA	3.86862e-263	0.321646	0.992	0.954	8.44403e-259	3	RPSA
PTMA	4.57778e-254	0.423808	0.967	0.895	9.99192e-250	3	PTMA
RPL30	1.05275e-250	0.308657	0.997	0.967	2.29785e-246	3	RPL30
LOC101022433	7.12725e-247	0.568747	0.856	0.673	1.55566e-242	3	LOC101022433
RPL12	7.90838e-246	0.468654	0.938	0.819	1.72616e-241	3	RPL12
EEF1G	1.03101e-240	0.512233	0.903	0.752	2.25038e-236	3	EEF1G
LOC101012877	3.96544e-235	0.711962	0.652	0.403	8.65537e-231	3	LOC101012877
LOC101001348	5.24274e-235	0.627262	0.766	0.555	1.14433e-230	3	LOC101001348
MARCKSL1	8.56724e-234	0.531496	0.889	0.689	1.86997e-229	3	MARCKSL1
RPL11	8.1117e-232	0.330279	0.985	0.93	1.77054e-227	3	RPL11
LOC101024168	6.20668e-227	0.595211	0.779	0.57	1.35473e-222	3	LOC101024168
LOC101026178	8.01936e-217	0.669962	0.619	0.363	1.75039e-212	3	LOC101026178
HNRNPA1	4.27864e-214	0.458471	0.918	0.786	9.33898e-210	3	HNRNPA1
LOC101019133	7.65331e-208	0.628577	0.698	0.481	1.67049e-203	3	LOC101019133
EEF1B2	5.91195e-202	0.427507	0.92	0.796	1.2904e-197	3	EEF1B2
RPL18A	6.97482e-193	0.310687	0.982	0.931	1.52239e-188	3	RPL18A
LOC103887841	1.40801e-191	0.568758	0.749	0.552	3.07326e-187	3	LOC103887841
ATP5F1E	9.11945e-190	0.402241	0.932	0.812	1.9905e-185	3	ATP5F1E
SLC25A6	2.67444e-186	0.469683	0.85	0.691	5.8375e-182	3	SLC25A6
BEX3	1.43819e-183	0.42887	0.912	0.782	3.13914e-179	3	BEX3
IFI27L2	8.83895e-183	0.428898	0.905	0.744	1.92928e-178	3	IFI27L2
CFL1	1.16799e-177	0.467177	0.835	0.661	2.54936e-173	3	CFL1
RPL241	1.49412e-174	0.277341	0.989	0.945	3.26121e-170	3	RPL24
FTH1	2.10258e-174	0.380873	0.916	0.805	4.5893e-170	3	FTH1
ACTB	1.20278e-173	0.36369	0.978	0.912	2.62531e-169	3	ACTB
LOC116273798	1.56825e-168	0.52264	0.736	0.557	3.42302e-164	3	LOC116273798
PEBP1	1.23586e-165	0.407623	0.895	0.753	2.69751e-161	3	PEBP1
SDCBP	5.22911e-161	0.499799	0.768	0.606	1.14136e-156	3	SDCBP
LOC101014053	9.29923e-161	0.336682	0.949	0.864	2.02974e-156	3	LOC101014053
LOC101014528	8.67981e-158	0.616026	0.593	0.399	1.89454e-153	3	LOC101014528
ATP5MF	2.13843e-157	0.405819	0.88	0.746	4.66755e-153	3	ATP5MF
BTF3	9.2553e-157	0.375012	0.898	0.782	2.02015e-152	3	BTF3
LOC100998924	2.75787e-150	0.378284	0.945	0.861	6.0196e-146	3	LOC100998924
BEX1	7.4671e-146	0.574558	0.687	0.5	1.62984e-141	3	BEX1
PFDN5	3.30156e-142	0.351766	0.901	0.782	7.20632e-138	3	PFDN5
RPS11	5.63238e-137	0.313015	0.946	0.844	1.22938e-132	3	RPS11
SKP1	1.18239e-134	0.390972	0.844	0.703	2.5808e-130	3	SKP1
LOC101014702	4.95635e-131	0.453823	0.711	0.557	1.08182e-126	3	LOC101014702
SLIRP	1.14588e-127	0.44368	0.748	0.597	2.50112e-123	3	SLIRP
LOC101026384	1.49172e-126	0.3931	0.81	0.638	3.25598e-122	3	LOC101026384
CALM2	4.62513e-123	0.366824	0.851	0.707	1.00953e-118	3	CALM2
ARPC2	1.93963e-122	0.370524	0.818	0.653	4.23363e-118	3	ARPC2
ZFAND6	4.48574e-120	0.403351	0.777	0.597	9.79102e-116	3	ZFAND6
DYNLT1	5.89392e-120	0.459178	0.667	0.503	1.28647e-115	3	DYNLT1
LOC100999426	3.16141e-119	0.542207	0.342	0.173	6.90042e-115	3	LOC100999426
LOC101018433	4.31696e-118	0.39743	0.781	0.654	9.42263e-114	3	LOC101018433
MIF	1.26932e-117	0.425223	0.781	0.646	2.77055e-113	3	MIF
TCEAL9	1.35687e-114	0.439379	0.761	0.627	2.96164e-110	3	TCEAL9
LOC101010649	2.32249e-112	0.423462	0.701	0.558	5.0693e-108	3	LOC101010649
LOC101022695	1.28876e-107	0.447198	0.659	0.521	2.81298e-103	3	LOC101022695
LOC116270584	6.5454e-107	0.459787	0.63	0.48	1.42866e-102	3	LOC116270584
LOC101009930	2.95249e-105	0.526836	0.472	0.314	6.44441e-101	3	LOC101009930
EIF4A2	1.14612e-103	0.351264	0.842	0.732	2.50164e-99	3	EIF4A2
MT2A	7.56798e-103	0.386025	0.772	0.586	1.65186e-98	3	MT2A
OAZ1	2.78781e-102	0.309087	0.885	0.771	6.08496e-98	3	OAZ1
EEF1D	1.15912e-101	0.333195	0.826	0.707	2.53001e-97	3	EEF1D
NDUFB1	2.9292e-101	0.413071	0.704	0.577	6.39357e-97	3	NDUFB1
LOC101011665	4.94232e-101	0.484682	0.558	0.413	1.07876e-96	3	LOC101011665
MRFAP1	5.98525e-98	0.404873	0.68	0.548	1.3064e-93	3	MRFAP1
MYL9	4.1922e-95	0.387548	0.665	0.521	9.15031e-91	3	MYL9
NPM1	5.27153e-95	0.328102	0.801	0.697	1.15062e-90	3	NPM1
LOC101023733	2.14449e-88	0.482612	0.475	0.331	4.68078e-84	3	LOC101023733
SNRPE	1.32055e-87	0.411307	0.614	0.486	2.88237e-83	3	SNRPE
LOC100999840	3.92111e-86	0.454472	0.531	0.39	8.55861e-82	3	LOC100999840
LOC116268904	1.63216e-85	0.312983	0.799	0.686	3.56252e-81	3	LOC116268904
LOC1038868651	4.01477e-85	0.351285	0.733	0.626	8.76304e-81	3	LOC103886865
RBP1	8.89015e-84	0.381798	0.697	0.57	1.94045e-79	3	RBP1
MT3	2.83091e-82	0.364923	0.687	0.508	6.17902e-78	3	MT3
LOC101015341	1.18853e-81	0.307263	0.803	0.687	2.59421e-77	3	LOC101015341
LOC116271079	3.20784e-81	0.292292	0.818	0.72	7.00175e-77	3	LOC116271079
NDUFS5	2.37642e-79	0.319653	0.77	0.662	5.187e-75	3	NDUFS5
MYL6	3.24455e-79	0.28789	0.886	0.802	7.08188e-75	3	MYL6
OST4	4.67524e-79	0.328811	0.754	0.643	1.02046e-74	3	OST4
CENPV	1.16376e-77	0.359095	0.636	0.493	2.54015e-73	3	CENPV
LOC116268975	2.80021e-77	0.458756	0.305	0.173	6.11201e-73	3	LOC116268975
LOC116269200	6.93871e-77	0.410746	0.53	0.405	1.51451e-72	3	LOC116269200
GSTM3	1.75513e-76	0.34063	0.815	0.685	3.83091e-72	3	GSTM3
C3H4orf481	2.46878e-74	0.287834	0.8	0.633	5.38861e-70	3	C3H4orf48
HPCAL1	1.34001e-73	0.392671	0.57	0.44	2.92483e-69	3	HPCAL1
ATP5MPL	2.07236e-73	0.330105	0.739	0.642	4.52333e-69	3	ATP5MPL
LOC101012125	8.55184e-73	0.332199	0.736	0.624	1.86661e-68	3	LOC101012125
LOC101001730	1.68343e-72	0.385645	0.599	0.456	3.67442e-68	3	LOC101001730
NUDT11	2.16181e-72	0.392043	0.526	0.391	4.71859e-68	3	NUDT11
RPL26	1.68302e-71	0.384329	0.574	0.456	3.67353e-67	3	RPL26
GATM	1.47365e-70	0.312728	0.673	0.524	3.21653e-66	3	GATM
C3H4orf3	5.41594e-70	0.346287	0.621	0.5	1.18214e-65	3	C3H4orf3
HMGN4	1.82093e-68	0.403067	0.505	0.383	3.97455e-64	3	HMGN4
PRDX1	4.15307e-68	0.319435	0.723	0.604	9.0649e-64	3	PRDX1
ATP5MD	5.59225e-68	0.391134	0.563	0.452	1.22062e-63	3	ATP5MD
LOC110743064	1.26614e-66	0.381614	0.569	0.455	2.7636e-62	3	LOC110743064
SMS	6.21839e-66	0.329585	0.645	0.515	1.35729e-61	3	SMS
GSTM4	1.38145e-63	0.395877	0.533	0.413	3.0153e-59	3	GSTM4
HPRT1	1.51117e-63	0.412304	0.486	0.367	3.29842e-59	3	HPRT1
LOC101016588	2.33936e-63	0.372101	0.528	0.402	5.10611e-59	3	LOC101016588
SRP14	2.86865e-63	0.282922	0.755	0.649	6.26141e-59	3	SRP14
LOC101010920	5.03057e-62	0.400054	0.486	0.369	1.09802e-57	3	LOC101010920
STMN1	7.67443e-62	0.34282	0.56	0.445	1.6751e-57	3	STMN1
SOD1	2.15983e-61	0.274439	0.774	0.682	4.71426e-57	3	SOD1
RBX1	5.05391e-61	0.289282	0.729	0.624	1.10312e-56	3	RBX1
GABARAP	5.04382e-60	0.275877	0.757	0.662	1.10091e-55	3	GABARAP
DCXR	1.93722e-58	0.399035	0.527	0.413	4.22836e-54	3	DCXR
TMEM258	8.4895e-58	0.294577	0.699	0.6	1.853e-53	3	TMEM258
TBCA	1.06975e-57	0.318078	0.613	0.507	2.33494e-53	3	TBCA
ATP6V1G1	1.64427e-57	0.27058	0.751	0.665	3.58894e-53	3	ATP6V1G1
TPM4	1.77836e-57	0.293124	0.701	0.587	3.88163e-53	3	TPM4
TRMT112	6.87098e-57	0.323383	0.576	0.472	1.49973e-52	3	TRMT112
LOC101026069	7.286e-56	0.418856	0.408	0.302	1.59031e-51	3	LOC101026069
RTRAF	9.34377e-56	0.322656	0.597	0.497	2.03947e-51	3	RTRAF
NDUFA3	1.05566e-55	0.32718	0.618	0.527	2.30418e-51	3	NDUFA3
YBX1	1.35212e-55	0.280461	0.684	0.588	2.95128e-51	3	YBX1
LOC100997845	1.4957e-55	0.298072	0.687	0.59	3.26467e-51	3	LOC100997845
DYNLRB1	2.64747e-55	0.311849	0.622	0.516	5.77863e-51	3	DYNLRB1
UBL5	3.60036e-55	0.279205	0.749	0.649	7.8585e-51	3	UBL5
C17H17orf49	5.33984e-55	0.252868	0.796	0.709	1.16553e-50	3	C17H17orf49
ROMO1	1.01635e-54	0.291232	0.698	0.598	2.21838e-50	3	ROMO1
CALM3	2.37046e-54	0.324576	0.597	0.494	5.17401e-50	3	CALM3
HMGN5	2.97689e-54	0.305085	0.648	0.523	6.49765e-50	3	HMGN5
GPX1	5.9026e-54	0.357657	0.532	0.429	1.28836e-49	3	GPX1
NDUFB2	1.47637e-53	0.321338	0.623	0.528	3.22246e-49	3	NDUFB2
LOC101012188	2.20016e-53	0.306289	0.627	0.531	4.80229e-49	3	LOC101012188
LOC116276383	3.15908e-53	0.39855	0.472	0.373	6.89532e-49	3	LOC116276383
EIF3K	3.34882e-53	0.261696	0.736	0.646	7.30947e-49	3	EIF3K
EIF3E	4.43832e-53	0.339234	0.585	0.49	9.68752e-49	3	EIF3E
TNNI3	8.20668e-52	0.343318	0.533	0.423	1.79127e-47	3	TNNI3
ELOB	1.68257e-51	0.275396	0.758	0.67	3.67256e-47	3	ELOB
COPE	5.51063e-51	0.310322	0.632	0.542	1.2028e-46	3	COPE
ATP5PF	7.19317e-51	0.267222	0.691	0.596	1.57005e-46	3	ATP5PF
EIF3H	7.22579e-51	0.301875	0.606	0.519	1.57717e-46	3	EIF3H
LOC101010708	1.33073e-49	0.319519	0.589	0.496	2.90458e-45	3	LOC101010708
LOC101013709	2.40001e-49	0.332798	0.555	0.465	5.23851e-45	3	LOC101013709
LOC101020740	4.92075e-49	0.397241	0.394	0.294	1.07405e-44	3	LOC101020740
NAP1L1	9.88919e-49	0.294749	0.63	0.537	2.15851e-44	3	NAP1L1
LOC101007047	1.68996e-46	0.346771	0.509	0.427	3.68869e-42	3	LOC101007047
TXN	4.51153e-46	0.297877	0.589	0.502	9.84733e-42	3	TXN
PSMB7	7.92922e-46	0.276596	0.628	0.545	1.73071e-41	3	PSMB7
LOC101007148	8.40746e-46	0.27116	0.698	0.616	1.8351e-41	3	LOC101007148
BANF1	3.15918e-45	0.277194	0.617	0.526	6.89554e-41	3	BANF1
FABP3	6.86585e-45	0.39859	0.399	0.306	1.49861e-40	3	FABP3
ATP5F1C	1.847e-44	0.282758	0.607	0.518	4.03145e-40	3	ATP5F1C
LOC101001071	1.4636e-43	0.367677	0.266	0.171	3.1946e-39	3	LOC101001071
RAC3	1.4137e-42	0.329697	0.443	0.351	3.08568e-38	3	RAC3
LOC101016759	1.71834e-42	0.262618	0.67	0.585	3.75062e-38	3	LOC101016759
BTF3L4	2.92961e-42	0.343326	0.453	0.365	6.39447e-38	3	BTF3L4
LOC100997829	1.23555e-40	0.359802	0.445	0.361	2.69684e-36	3	LOC100997829
U2AF2	8.33865e-40	0.2949	0.534	0.444	1.82008e-35	3	U2AF2
CDK2AP1	1.10386e-39	0.302197	0.503	0.418	2.4094e-35	3	CDK2AP1
LOC101020872	2.03033e-39	0.397784	0.288	0.202	4.4316e-35	3	LOC101020872
CSTB	1.43423e-38	0.301428	0.511	0.431	3.13049e-34	3	CSTB
LOC116272386	6.26183e-38	0.28638	0.498	0.419	1.36677e-33	3	LOC116272386
UBE2E3	1.28927e-37	0.341944	0.447	0.368	2.8141e-33	3	UBE2E3
LOC101018964	2.01411e-37	0.351904	0.406	0.323	4.39619e-33	3	LOC101018964
UBE2E1	2.73508e-37	0.359903	0.372	0.288	5.96987e-33	3	UBE2E1
PRDX5	4.25886e-37	0.290522	0.514	0.436	9.29581e-33	3	PRDX5
DEAF1	4.29749e-36	0.334619	0.386	0.304	9.38014e-32	3	DEAF1
EIF3L	4.69837e-36	0.301271	0.484	0.405	1.02551e-31	3	EIF3L
EIF4EBP1	4.95349e-36	0.290144	0.486	0.412	1.0812e-31	3	EIF4EBP1
LOC101005903	4.9972e-36	0.381652	0.289	0.207	1.09074e-31	3	LOC101005903
LOC101022082	5.7794e-36	0.335043	0.384	0.302	1.26147e-31	3	LOC101022082
LOC100997667	1.20653e-35	0.355785	0.285	0.202	2.6335e-31	3	LOC100997667
LOC116271814	6.65635e-35	0.301742	0.44	0.356	1.45288e-30	3	LOC116271814
LOC103875536	3.2433e-34	0.25754	0.659	0.582	7.07915e-30	3	LOC103875536
ENHO	5.38654e-34	0.332226	0.412	0.332	1.17572e-29	3	ENHO
LOC101002878	8.59978e-34	0.313296	0.424	0.348	1.87707e-29	3	LOC101002878
NDUFB11	8.99569e-34	0.294925	0.494	0.428	1.96349e-29	3	NDUFB11
LOC101024203	2.04548e-33	0.358535	0.378	0.303	4.46466e-29	3	LOC101024203
LOC101005268	3.2259e-33	0.338515	0.383	0.307	7.04117e-29	3	LOC101005268
PDRG1	7.81105e-33	0.281548	0.523	0.449	1.70492e-28	3	PDRG1
KLK1	9.136e-33	0.375186	0.358	0.28	1.99411e-28	3	KLK1
NOP53	1.24186e-32	0.269468	0.541	0.471	2.71061e-28	3	NOP53
RBM3	1.73194e-32	0.276392	0.488	0.408	3.7803e-28	3	RBM3
ATP5ME	2.16951e-31	0.285186	0.541	0.477	4.73538e-27	3	ATP5ME
ARPC5	4.27781e-31	0.308611	0.402	0.333	9.33717e-27	3	ARPC5
GMPR	1.29436e-30	0.270791	0.493	0.424	2.82519e-26	3	GMPR
POLR2F	1.86841e-30	0.281492	0.493	0.43	4.07817e-26	3	POLR2F
ARPC1B	2.47314e-30	0.298405	0.415	0.343	5.39813e-26	3	ARPC1B
C1H1orf122	2.83103e-30	0.268799	0.492	0.415	6.17929e-26	3	C1H1orf122
SNRPD2	5.51396e-30	0.252281	0.563	0.501	1.20353e-25	3	SNRPD2
RPS27L	9.99383e-30	0.27913	0.478	0.413	2.18135e-25	3	RPS27L
BEX4	1.28419e-29	0.263747	0.572	0.513	2.803e-25	3	BEX4
LOC101025557	6.17723e-29	0.332889	0.267	0.193	1.3483e-24	3	LOC101025557
GYG1	6.38766e-29	0.304431	0.377	0.304	1.39424e-24	3	GYG1
PGAM1	1.45809e-28	0.263148	0.489	0.427	3.18256e-24	3	PGAM1
TCEAL8	1.46215e-26	0.253306	0.5	0.439	3.19144e-22	3	TCEAL8
LOC101001328	1.96679e-26	0.266316	0.448	0.382	4.29292e-22	3	LOC101001328
EIF3M	2.60363e-26	0.287356	0.422	0.36	5.68294e-22	3	EIF3M
RAP1B	6.25098e-26	0.292099	0.384	0.319	1.3644e-21	3	RAP1B
PDLIM4	1.61178e-25	0.258561	0.462	0.399	3.51803e-21	3	PDLIM4
LOC116275018	1.06549e-24	0.297968	0.389	0.33	2.32565e-20	3	LOC116275018
RPL4	1.39405e-24	0.291986	0.423	0.366	3.0428e-20	3	RPL4
LOC101024878	1.91533e-24	0.32629	0.3	0.235	4.1806e-20	3	LOC101024878
LOC116275254	3.00795e-24	0.341541	0.256	0.193	6.56544e-20	3	LOC116275254
COX8A	3.18008e-24	0.292686	0.38	0.322	6.94117e-20	3	COX8A
LOC100997843	6.51678e-24	0.272975	0.324	0.256	1.42242e-19	3	LOC100997843
LOC101003703	2.05351e-23	0.271698	0.431	0.375	4.48219e-19	3	LOC101003703
LOC116270509	2.61986e-23	0.315937	0.277	0.214	5.71837e-19	3	LOC116270509
DCTN3	5.63831e-23	0.251724	0.428	0.371	1.23067e-18	3	DCTN3
CRYL1	7.81675e-23	0.254026	0.414	0.353	1.70616e-18	3	CRYL1
LOC108586323	1.22851e-22	0.290272	0.318	0.255	2.68146e-18	3	LOC108586323
LOC101023451	1.25546e-21	0.330194	0.272	0.214	2.74029e-17	3	LOC101023451
GTF2H5	4.13198e-21	0.268695	0.462	0.415	9.01888e-17	3	GTF2H5
LOC101006001	9.87875e-21	0.27881	0.391	0.343	2.15624e-16	3	LOC101006001
FBL	1.84459e-20	0.287871	0.355	0.301	4.02618e-16	3	FBL
CCDC142	1.43924e-19	0.272124	0.39	0.344	3.14143e-15	3	CCDC142
TCEAL5	2.29968e-19	0.31439	0.384	0.331	5.01951e-15	3	TCEAL5
HIGD2A	3.08222e-19	0.263839	0.411	0.365	6.72755e-15	3	HIGD2A
LOC116273527	3.24354e-19	0.260359	0.418	0.373	7.07966e-15	3	LOC116273527
DUSP15	3.1306e-18	0.291291	0.28	0.228	6.83316e-14	3	DUSP15
LOC110743695	3.38334e-18	0.283145	0.319	0.267	7.38481e-14	3	LOC110743695
PPDPF	4.57144e-18	0.265671	0.383	0.335	9.97809e-14	3	PPDPF
TOMM22	6.1356e-17	0.307688	0.297	0.253	1.33922e-12	3	TOMM22
SNRPD1	1.23894e-16	0.263337	0.372	0.331	2.70424e-12	3	SNRPD1
SNRPC	5.61405e-16	0.267352	0.295	0.248	1.22538e-11	3	SNRPC
RPL29	2.26575e-15	0.2679	0.329	0.287	4.94544e-11	3	RPL29
PERP	4.31998e-15	0.261418	0.273	0.227	9.42921e-11	3	PERP
LOC116274941	2.97029e-14	0.263455	0.322	0.282	6.48325e-10	3	LOC116274941
MPHOSPH6	3.4087e-13	0.2536	0.29	0.249	7.44016e-09	3	MPHOSPH6
UXT	2.39284e-12	0.250547	0.275	0.238	5.22284e-08	3	UXT
LOC101011406	7.22861e-12	0.278922	0.266	0.23	1.57779e-07	3	LOC101011406
CHMP4B	9.45957e-12	0.254143	0.334	0.302	2.06474e-07	3	CHMP4B
LAMTOR2	1.52089e-11	0.250054	0.311	0.279	3.31964e-07	3	LAMTOR2
HIBADH	1.58752e-11	0.252392	0.292	0.259	3.46507e-07	3	HIBADH
AMH2	1.00482e-113	0.314386	0.984	0.829	2.19321e-109	4	AMH
PLA2G1B1	2.54771e-103	0.326082	0.898	0.798	5.56088e-99	4	PLA2G1B
GAS61	6.26337e-72	0.295927	0.838	0.711	1.36711e-67	4	GAS6
MT2A1	3.36474e-62	0.315929	0.73	0.593	7.34421e-58	4	MT2A
ATP1B12	4.0616e-60	0.269451	0.803	0.643	8.86525e-56	4	ATP1B1
C3H4orf482	1.38777e-58	0.270577	0.789	0.637	3.02909e-54	4	C3H4orf48
MT31	2.00258e-57	0.311524	0.664	0.513	4.37104e-53	4	MT3
PRDX61	3.00675e-57	0.262641	0.838	0.697	6.56282e-53	4	PRDX6
LOC1010081592	1.94818e-49	0.277272	0.645	0.481	4.25229e-45	4	LOC101008159
HPCAL11	5.61836e-47	0.318025	0.579	0.441	1.22632e-42	4	HPCAL1
CENPV1	1.17504e-46	0.301811	0.631	0.496	2.56475e-42	4	CENPV
INHA1	1.44831e-45	0.265566	0.701	0.537	3.16122e-41	4	INHA
NSG1	4.72429e-41	0.29062	0.477	0.345	1.03117e-36	4	NSG1
LSR1	7.02711e-40	0.275057	0.564	0.424	1.53381e-35	4	LSR
TNNI31	1.65137e-39	0.290377	0.556	0.422	3.60445e-35	4	TNNI3
LOC1010017301	1.33811e-37	0.258738	0.594	0.458	2.9207e-33	4	LOC101001730
IGFBP21	1.16805e-35	0.282586	0.644	0.533	2.5495e-31	4	IGFBP2
PRDX11	2.25708e-35	0.250192	0.704	0.608	4.92653e-31	4	PRDX1
PMEL2	7.40214e-35	0.256615	0.505	0.377	1.61566e-30	4	PMEL
GATM1	1.55918e-34	0.250303	0.663	0.528	3.40322e-30	4	GATM
SERPINA51	1.15261e-30	0.265259	0.499	0.379	2.5158e-26	4	SERPINA5
PPP1R14B	1.35659e-29	0.275213	0.461	0.359	2.96103e-25	4	PPP1R14B
DCXR1	1.27362e-28	0.262339	0.518	0.415	2.77992e-24	4	DCXR
LOC1085818812	0	0.578362	1	0.907	0	5	LOC108581881
SYNE22	5.10848e-184	0.616885	0.824	0.571	1.11503e-179	5	SYNE2
LOC1010072281	1.43172e-170	0.452617	0.955	0.865	3.12501e-166	5	LOC101007228
DDX172	4.26257e-162	0.515692	0.885	0.711	9.30391e-158	5	DDX17
SRSF112	3.01663e-157	0.494968	0.894	0.726	6.5844e-153	5	SRSF11
ARGLU1	1.08971e-149	0.679182	0.683	0.449	2.3785e-145	5	ARGLU1
LOC1162717242	2.26635e-145	0.796632	0.525	0.288	4.94676e-141	5	LOC116271724
LUC7L31	1.70427e-144	0.550685	0.793	0.592	3.71991e-140	5	LUC7L3
SCML12	9.82657e-119	0.607525	0.683	0.474	2.14485e-114	5	SCML1
KTN12	5.37116e-103	0.433062	0.84	0.67	1.17236e-98	5	KTN1
KMT2C1	9.25441e-89	0.535233	0.573	0.39	2.01996e-84	5	KMT2C
RUFY31	2.82426e-87	0.534747	0.585	0.401	6.16452e-83	5	RUFY3
LOC116268488	9.21469e-85	0.548406	0.271	0.121	2.01129e-80	5	LOC116268488
CHD62	2.81741e-83	0.555932	0.544	0.368	6.14955e-79	5	CHD6
MYO62	9.592e-83	0.506068	0.535	0.349	2.09365e-78	5	MYO6
DDX51	1.05513e-80	0.370404	0.784	0.641	2.30304e-76	5	DDX5
PWWP3B2	1.31702e-78	0.51795	0.552	0.377	2.87467e-74	5	PWWP3B
LOC1010081593	1.63961e-75	0.424757	0.666	0.483	3.57877e-71	5	LOC101008159
LIMCH11	1.33482e-67	0.482305	0.481	0.317	2.9135e-63	5	LIMCH1
PNISR	5.97776e-65	0.393958	0.726	0.591	1.30477e-60	5	PNISR
ZBTB201	2.51808e-63	0.435415	0.619	0.475	5.49621e-59	5	ZBTB20
BBX2	8.81513e-63	0.404406	0.642	0.499	1.92408e-58	5	BBX
SERINC52	9.56881e-61	0.423954	0.517	0.361	2.08858e-56	5	SERINC5
GLB1L32	1.97636e-59	0.372825	0.477	0.31	4.3138e-55	5	GLB1L3
HMGN51	3.03586e-58	0.375208	0.672	0.525	6.62636e-54	5	HMGN5
RAD212	1.20841e-57	0.361199	0.629	0.488	2.63761e-53	5	RAD21
LOC1010159202	2.43101e-54	0.46863	0.383	0.243	5.30616e-50	5	LOC101015920
PNN	7.91646e-52	0.41352	0.582	0.445	1.72793e-47	5	PNN
PCDH11X	1.15228e-51	0.452339	0.312	0.18	2.51508e-47	5	PCDH11X
AKAP91	3.3825e-51	0.411552	0.578	0.448	7.38298e-47	5	AKAP9
TNRC6B1	5.58666e-51	0.407007	0.602	0.476	1.2194e-46	5	TNRC6B
SRSF102	2.04157e-50	0.390651	0.594	0.457	4.45613e-46	5	SRSF10
ZMAT11	2.36714e-50	0.478983	0.284	0.162	5.16675e-46	5	ZMAT1
CGNL11	9.01393e-49	0.420725	0.321	0.192	1.96747e-44	5	CGNL1
HLTF1	1.64778e-48	0.362545	0.646	0.514	3.59661e-44	5	HLTF
SON	8.90822e-48	0.312091	0.752	0.654	1.9444e-43	5	SON
ATP1B13	1.48846e-47	0.272557	0.786	0.648	3.24887e-43	5	ATP1B1
LOC116273289	6.41722e-47	0.421977	0.264	0.147	1.40069e-42	5	LOC116273289
ERBB31	1.03159e-46	0.415801	0.315	0.188	2.25164e-42	5	ERBB3
PSAP2	1.74363e-45	0.28454	0.753	0.649	3.80582e-41	5	PSAP
ARL15	2.28706e-45	0.401968	0.297	0.175	4.99196e-41	5	ARL15
RDX	2.42736e-45	0.337985	0.667	0.565	5.29819e-41	5	RDX
WDR60	3.60961e-45	0.414366	0.322	0.197	7.87869e-41	5	WDR60
DSP1	1.65691e-44	0.412894	0.3	0.18	3.61655e-40	5	DSP
CELF11	2.81283e-44	0.412614	0.433	0.304	6.13955e-40	5	CELF1
GCC2	3.2983e-44	0.423681	0.475	0.349	7.1992e-40	5	GCC2
UPF21	9.16495e-44	0.387427	0.55	0.425	2.00043e-39	5	UPF2
SOX92	3.27581e-43	0.359068	0.504	0.376	7.15012e-39	5	SOX9
CHD9	1.01551e-40	0.399533	0.518	0.399	2.21656e-36	5	CHD9
PHF14	8.10634e-40	0.375961	0.546	0.425	1.76937e-35	5	PHF14
RIMKLB	8.68856e-40	0.405835	0.36	0.239	1.89645e-35	5	RIMKLB
LOC110744199	9.14393e-40	0.282169	0.436	0.304	1.99585e-35	5	LOC110744199
ZNF462	2.55297e-39	0.3941	0.304	0.192	5.57237e-35	5	ZNF462
CTNND12	3.31467e-39	0.37518	0.464	0.344	7.23493e-35	5	CTNND1
GOLGB1	6.63059e-39	0.401712	0.407	0.292	1.44726e-34	5	GOLGB1
ESPN2	1.20186e-38	0.388433	0.365	0.245	2.62329e-34	5	ESPN
RSRP1	2.10908e-38	0.322567	0.654	0.543	4.60349e-34	5	RSRP1
WRN	2.5729e-38	0.445071	0.354	0.241	5.61588e-34	5	WRN
SLC25A292	1.07537e-36	0.408141	0.403	0.288	2.34722e-32	5	SLC25A29
SMC5	1.20703e-36	0.433321	0.433	0.322	2.63459e-32	5	SMC5
ATRX	3.00942e-36	0.366576	0.474	0.364	6.56866e-32	5	ATRX
BCLAF1	1.00402e-35	0.350803	0.481	0.37	2.19148e-31	5	BCLAF1
DCLK11	2.85726e-35	0.392324	0.366	0.254	6.23655e-31	5	DCLK1
LOC101009313	3.27037e-35	0.406363	0.261	0.161	7.13824e-31	5	LOC101009313
MBNL31	5.76948e-35	0.35595	0.389	0.276	1.2593e-30	5	MBNL3
SORL12	6.6171e-35	0.352451	0.41	0.295	1.44431e-30	5	SORL1
NKTR	2.04957e-34	0.362817	0.435	0.32	4.4736e-30	5	NKTR
CADM1	4.35302e-34	0.382582	0.361	0.25	9.50134e-30	5	CADM1
LOC101017757	6.24772e-34	0.409507	0.303	0.198	1.36369e-29	5	LOC101017757
SRGAP11	1.19625e-33	0.354975	0.345	0.235	2.61105e-29	5	SRGAP1
PHIP	1.22178e-33	0.355335	0.39	0.277	2.66679e-29	5	PHIP
FMNL21	1.30271e-33	0.355695	0.335	0.225	2.84342e-29	5	FMNL2
MBOAT72	2.92058e-33	0.337344	0.429	0.314	6.37476e-29	5	MBOAT7
TANC22	3.42517e-33	0.321873	0.328	0.22	7.47612e-29	5	TANC2
FHOD31	1.15856e-32	0.380324	0.317	0.214	2.52879e-28	5	FHOD3
DDX241	7.89456e-31	0.275393	0.681	0.575	1.72315e-26	5	DDX24
REST	1.17615e-29	0.34176	0.454	0.355	2.56719e-25	5	REST
EIF3A	4.01858e-29	0.340006	0.348	0.247	8.77136e-25	5	EIF3A
HUWE1	2.87547e-28	0.342605	0.335	0.238	6.27629e-24	5	HUWE1
USP111	3.97745e-28	0.313757	0.465	0.363	8.68158e-24	5	USP11
JADE1	2.43208e-27	0.32607	0.256	0.165	5.3085e-23	5	JADE1
SFPQ	3.19131e-27	0.376446	0.452	0.36	6.96568e-23	5	SFPQ
DYNC1H1	3.65574e-27	0.3402	0.411	0.314	7.97939e-23	5	DYNC1H1
NAV2	4.23962e-27	0.352094	0.269	0.177	9.25383e-23	5	NAV2
GOLGA4	7.36653e-27	0.351201	0.408	0.311	1.60789e-22	5	GOLGA4
SMC62	8.18709e-27	0.316937	0.437	0.339	1.787e-22	5	SMC6
CAST	9.42362e-27	0.305163	0.482	0.387	2.05689e-22	5	CAST
WNK1	1.10785e-26	0.317757	0.345	0.249	2.41811e-22	5	WNK1
SLC26A21	3.91004e-26	0.29819	0.312	0.216	8.53444e-22	5	SLC26A2
JCAD2	3.91975e-26	0.326233	0.355	0.26	8.55563e-22	5	JCAD
DAAM11	5.30594e-26	0.330503	0.321	0.226	1.15813e-21	5	DAAM1
IGF1R1	5.78456e-26	0.293753	0.351	0.256	1.2626e-21	5	IGF1R
GNPTAB	5.90334e-26	0.340487	0.357	0.262	1.28852e-21	5	GNPTAB
ANKRD11	7.94442e-26	0.352049	0.383	0.289	1.73403e-21	5	ANKRD11
SPTAN11	8.54015e-26	0.29857	0.439	0.341	1.86406e-21	5	SPTAN1
BAZ1A	2.096e-25	0.337701	0.266	0.177	4.57494e-21	5	BAZ1A
ARMH4	6.36016e-25	0.30906	0.264	0.178	1.38823e-20	5	ARMH4
CDK61	7.2258e-25	0.354265	0.316	0.225	1.57718e-20	5	CDK6
USP15	7.79236e-25	0.371073	0.369	0.279	1.70084e-20	5	USP15
USP131	1.24017e-24	0.333959	0.323	0.232	2.70692e-20	5	USP13
INHBB2	1.42782e-24	0.297012	0.353	0.261	3.11651e-20	5	INHBB
IQCK	2.07891e-24	0.298272	0.278	0.187	4.53764e-20	5	IQCK
MAP1B1	4.66334e-24	0.313653	0.468	0.371	1.01787e-19	5	MAP1B
ARID4B	4.69383e-24	0.341761	0.374	0.285	1.02452e-19	5	ARID4B
LOC101013586	5.15579e-24	0.304208	0.37	0.276	1.12536e-19	5	LOC101013586
ADGRG11	8.72084e-24	0.274575	0.419	0.324	1.9035e-19	5	ADGRG1
CEP290	9.07087e-24	0.304001	0.266	0.18	1.9799e-19	5	CEP290
TNPO3	3.12095e-23	0.334093	0.299	0.211	6.81211e-19	5	TNPO3
CTSV1	4.11844e-23	0.282839	0.458	0.364	8.98932e-19	5	CTSV
AKAP8L	4.84858e-23	0.335398	0.341	0.252	1.0583e-18	5	AKAP8L
ZNF292	5.64328e-23	0.352393	0.369	0.282	1.23176e-18	5	ZNF292
EIF4G3	1.66254e-22	0.28784	0.3	0.214	3.62883e-18	5	EIF4G3
TOGARAM1	2.56407e-22	0.309488	0.259	0.177	5.5966e-18	5	TOGARAM1
TRIM25	4.63221e-22	0.306319	0.272	0.19	1.01107e-17	5	TRIM25
FHOD11	5.5227e-22	0.299274	0.273	0.189	1.20544e-17	5	FHOD1
GPC12	7.89046e-22	0.256876	0.434	0.341	1.72225e-17	5	GPC1
RUNX1T1	9.15825e-22	0.311532	0.358	0.268	1.99897e-17	5	RUNX1T1
HNRNPU	1.06107e-21	0.288509	0.516	0.439	2.31599e-17	5	HNRNPU
TTC14	1.40042e-21	0.296784	0.27	0.188	3.05669e-17	5	TTC14
HACD2	2.57318e-21	0.250153	0.364	0.274	5.61649e-17	5	HACD2
RB1CC1	2.6687e-21	0.298893	0.339	0.253	5.82497e-17	5	RB1CC1
MAP4K4	2.78526e-21	0.324145	0.344	0.262	6.07939e-17	5	MAP4K4
LOC1010104941	4.80318e-21	0.288776	0.408	0.322	1.04839e-16	5	LOC101010494
CRIM1	5.63269e-21	0.301639	0.292	0.211	1.22945e-16	5	CRIM1
LOC1010141531	9.70821e-21	0.319448	0.279	0.199	2.11901e-16	5	LOC101014153
SLC36A4	1.19437e-20	0.259083	0.294	0.21	2.60695e-16	5	SLC36A4
LGR42	3.71132e-20	0.29831	0.318	0.237	8.1007e-16	5	LGR4
TMEM123	4.0334e-20	0.260956	0.454	0.374	8.8037e-16	5	TMEM123
CAMKK2	6.52654e-20	0.292872	0.401	0.318	1.42455e-15	5	CAMKK2
ULK4	8.2077e-20	0.309515	0.419	0.335	1.7915e-15	5	ULK4
THOC2	4.06612e-19	0.28253	0.35	0.269	8.87512e-15	5	THOC2
MACF1	7.83185e-19	0.299546	0.381	0.302	1.70946e-14	5	MACF1
SCAF11	1.04841e-18	0.256396	0.43	0.349	2.28836e-14	5	SCAF11
ATXN2	2.53136e-18	0.274384	0.279	0.203	5.5252e-14	5	ATXN2
ASH1L	4.07875e-18	0.300222	0.349	0.274	8.90269e-14	5	ASH1L
BPTF	4.53769e-18	0.30715	0.442	0.37	9.90443e-14	5	BPTF
TMEM106B	1.32448e-17	0.260754	0.295	0.218	2.89095e-13	5	TMEM106B
CREBRF	1.38497e-17	0.278849	0.327	0.251	3.02297e-13	5	CREBRF
GUCY1A1	1.64654e-17	0.263527	0.314	0.237	3.5939e-13	5	GUCY1A1
TCAF1	2.09497e-17	0.267843	0.266	0.194	4.57269e-13	5	TCAF1
MAP7D3	2.52874e-17	0.291166	0.306	0.229	5.51947e-13	5	MAP7D3
ABI2	2.70662e-17	0.277849	0.326	0.251	5.90773e-13	5	ABI2
MSI2	6.1516e-17	0.277681	0.306	0.234	1.34271e-12	5	MSI2
DST	7.88173e-17	0.299724	0.339	0.265	1.72035e-12	5	DST
RERE	9.78323e-17	0.297775	0.407	0.338	2.13539e-12	5	RERE
AMIGO2	1.53002e-16	0.252532	0.257	0.187	3.33958e-12	5	AMIGO2
SLK	1.64572e-16	0.298024	0.334	0.265	3.59211e-12	5	SLK
TAOK1	1.81105e-16	0.254078	0.329	0.255	3.95297e-12	5	TAOK1
KMT2E	2.44497e-16	0.25765	0.448	0.375	5.33663e-12	5	KMT2E
SRSF5	2.80596e-16	0.257753	0.576	0.516	6.12456e-12	5	SRSF5
GTF2I	3.54472e-16	0.250654	0.411	0.339	7.73705e-12	5	GTF2I
TNRC6A	4.81484e-16	0.261256	0.373	0.302	1.05093e-11	5	TNRC6A
RSF1	7.86376e-16	0.282622	0.364	0.293	1.71642e-11	5	RSF1
EPB41L2	8.91768e-16	0.272795	0.364	0.29	1.94646e-11	5	EPB41L2
IVNS1ABP	1.51561e-15	0.285856	0.291	0.224	3.30813e-11	5	IVNS1ABP
SERINC3	2.69698e-15	0.265247	0.39	0.32	5.8867e-11	5	SERINC3
TAOK3	3.18031e-15	0.267956	0.273	0.204	6.94167e-11	5	TAOK3
FILIP1L	3.59228e-15	0.271054	0.272	0.204	7.84088e-11	5	FILIP1L
RBM26	4.6818e-15	0.27973	0.349	0.279	1.0219e-10	5	RBM26
LOC101023797	5.09069e-15	0.280763	0.285	0.218	1.11115e-10	5	LOC101023797
BDP1	6.96964e-15	0.276379	0.28	0.214	1.52126e-10	5	BDP1
MAP3K1	7.49632e-15	0.263541	0.362	0.295	1.63622e-10	5	MAP3K1
EIF5B	9.28205e-15	0.265052	0.47	0.404	2.02599e-10	5	EIF5B
ZNF711	1.20146e-14	0.27521	0.252	0.188	2.62242e-10	5	ZNF711
ADNP	1.61213e-14	0.2853	0.337	0.272	3.5188e-10	5	ADNP
SIPA1L2	2.22399e-14	0.267847	0.293	0.227	4.8543e-10	5	SIPA1L2
POGZ	6.74626e-14	0.269981	0.314	0.248	1.47251e-09	5	POGZ
ACSM3	6.75461e-14	0.254218	0.311	0.245	1.47433e-09	5	ACSM3
FOXP1	6.81593e-14	0.251037	0.287	0.222	1.48771e-09	5	FOXP1
MOSPD1	7.61007e-14	0.288913	0.266	0.204	1.66105e-09	5	MOSPD1
DDX46	1.57804e-13	0.272376	0.382	0.321	3.44439e-09	5	DDX46
ITPRID2	1.85188e-12	0.254435	0.311	0.253	4.0421e-08	5	ITPRID2
CREBZF	2.34155e-12	0.261526	0.281	0.222	5.1109e-08	5	CREBZF
PUM1	5.32901e-12	0.250282	0.32	0.261	1.16316e-07	5	PUM1
HELZ	1.31759e-11	0.270811	0.269	0.214	2.87591e-07	5	HELZ
LOC1107441991	0	1.85079	0.718	0.293	0	6	LOC110744199
ULK41	0	1.47764	0.761	0.318	0	6	ULK4
ST3GAL6	2.85502e-178	1.01764	0.287	0.07	6.23165e-174	6	ST3GAL6
CTNNB1	1.15638e-165	0.963762	0.63	0.343	2.52403e-161	6	CTNNB1
IQCK1	2.04397e-147	1.05405	0.443	0.18	4.46138e-143	6	IQCK
GPS2	6.04724e-145	1.09716	0.609	0.352	1.31993e-140	6	GPS2
IFI6	2.84823e-128	0.556152	0.949	0.859	6.21683e-124	6	IFI6
EIF5A	5.72643e-106	0.828808	0.445	0.215	1.24991e-101	6	EIF5A
LOC116274901	7.18927e-77	0.86798	0.346	0.166	1.5692e-72	6	LOC116274901
HLTF2	9.10524e-68	0.559196	0.674	0.516	1.9874e-63	6	HLTF
MAP3K12	3.55361e-51	0.753369	0.26	0.127	7.75646e-47	6	MAP3K12
LOC100998135	5.03614e-38	0.432285	0.654	0.58	1.09924e-33	6	LOC100998135
PWWP3B3	4.25018e-37	0.485555	0.511	0.385	9.27686e-33	6	PWWP3B
SYNE23	1.1884e-34	0.387654	0.705	0.586	2.59393e-30	6	SYNE2
LOC1010135861	1.20141e-31	0.567907	0.391	0.277	2.62233e-27	6	LOC101013586
MAP3K11	3.74761e-26	0.460454	0.399	0.295	8.1799e-22	6	MAP3K1
SET	9.96371e-26	0.387009	0.569	0.492	2.17478e-21	6	SET
CALR	3.71326e-25	0.317645	0.686	0.641	8.10493e-21	6	CALR
GNPTAB1	8.26027e-25	0.444888	0.368	0.264	1.80297e-20	6	GNPTAB
MAP4K41	2.81384e-21	0.478494	0.356	0.264	6.14177e-17	6	MAP4K4
EGR12	6.12479e-20	0.306227	0.628	0.552	1.33686e-15	6	EGR1
ATP1B14	3.15146e-19	0.251823	0.736	0.655	6.8787e-15	6	ATP1B1
BRD4	1.7952e-18	0.445042	0.377	0.297	3.91838e-14	6	BRD4
PDSS1	1.0326e-16	0.632949	0.307	0.232	2.25386e-12	6	PDSS1
NKX3-1	4.50523e-16	0.407194	0.377	0.301	9.83355e-12	6	NKX3-1
DCBLD2	1.56647e-15	0.458033	0.29	0.215	3.41914e-11	6	DCBLD2
DDX242	7.59664e-15	0.253747	0.639	0.581	1.65812e-10	6	DDX24
LIMCH12	6.44375e-14	0.399324	0.395	0.327	1.40648e-09	6	LIMCH1
SOX93	1.86788e-13	0.326911	0.447	0.383	4.07702e-09	6	SOX9
LAPTM4B	3.143e-13	0.271074	0.613	0.565	6.86023e-09	6	LAPTM4B
SERINC53	5.07448e-13	0.360273	0.428	0.371	1.10761e-08	6	SERINC5
ENDOD1	2.72929e-12	0.40121	0.318	0.256	5.95723e-08	6	ENDOD1
RUFY32	1.19678e-11	0.323787	0.468	0.413	2.6122e-07	6	RUFY3
PPP1CB	2.44104e-11	0.320195	0.423	0.366	5.32805e-07	6	PPP1CB
LOC1010081594	4.13472e-11	0.270491	0.539	0.496	9.02486e-07	6	LOC101008159
CADM11	7.78461e-11	0.38876	0.313	0.257	1.69915e-06	6	CADM1
RIMKLB1	1.19909e-10	0.380482	0.307	0.246	2.61725e-06	6	RIMKLB
SPTBN11	1.47373e-10	0.294728	0.448	0.391	3.2167e-06	6	SPTBN1
CCDC6	2.33435e-10	0.330066	0.257	0.198	5.09518e-06	6	CCDC6
KIF5B2	2.46703e-10	0.275597	0.547	0.51	5.38479e-06	6	KIF5B
TSPYL1	7.97878e-09	0.334833	0.393	0.349	0.000174153	6	TSPYL1
MYO63	1.24562e-08	0.30867	0.409	0.363	0.000271882	6	MYO6
KMT2C2	4.70597e-08	0.287226	0.439	0.403	0.00102717	6	KMT2C
YWHAE	8.43536e-08	0.303878	0.454	0.427	0.00184119	6	YWHAE
ADGRG12	7.18443e-07	0.293213	0.369	0.33	0.0156815	6	ADGRG1
SLK1	1.53772e-06	0.284906	0.308	0.269	0.0335638	6	SLK
CTNNAL11	2.8105e-06	0.25158	0.449	0.416	0.0613447	6	CTNNAL1
HNRNPH1	3.86056e-06	0.337989	0.386	0.361	0.0842645	6	HNRNPH1
CTSV2	5.89407e-06	0.251991	0.404	0.37	0.12865	6	CTSV
SMC63	6.59089e-06	0.262612	0.381	0.345	0.143859	6	SMC6
ZFAND5	7.25495e-06	0.285765	0.441	0.422	0.158354	6	ZFAND5
TMEM97	7.31165e-06	0.289018	0.334	0.301	0.159591	6	TMEM97
ESPN3	7.37313e-06	0.318255	0.289	0.253	0.160933	6	ESPN
SPTAN12	1.02211e-05	0.273307	0.379	0.348	0.223095	6	SPTAN1
NSG11	1.39234e-05	0.258558	0.39	0.357	0.303905	6	NSG1
TAX1BP1	3.26897e-05	0.284795	0.402	0.381	0.713518	6	TAX1BP1
MBNL32	3.49877e-05	0.284	0.314	0.284	0.763676	6	MBNL3
ITPRID21	4.03008e-05	0.274839	0.288	0.256	0.879646	6	ITPRID2
TJP1	4.18745e-05	0.252524	0.397	0.375	0.913995	6	TJP1
FHOD32	4.91922e-05	0.291626	0.255	0.221	1	6	FHOD3
BZW1	7.7928e-05	0.284447	0.377	0.358	1	6	BZW1
IGF1R2	8.31925e-05	0.280785	0.292	0.262	1	6	IGF1R
TRA2A	9.19489e-05	0.28772	0.369	0.35	1	6	TRA2A
INHBB3	0.000191925	0.259319	0.296	0.268	1	6	INHBB
TANC23	0.000208031	0.298397	0.255	0.228	1	6	TANC2
REST1	0.000381629	0.26631	0.381	0.362	1	6	REST
CREBBP	0.000438019	0.258555	0.279	0.253	1	6	CREBBP
MTHFS	0.000558025	0.251973	0.386	0.369	1	6	MTHFS
SRGAP12	0.0007141	0.300728	0.265	0.243	1	6	SRGAP1
JCAD3	0.00288586	0.250544	0.283	0.267	1	6	JCAD
GNG7	0.00299755	0.270374	0.31	0.296	1	6	GNG7
LOC1162736231	0.00386119	0.371204	0.498	0.495	1	6	LOC116273623
COL15A11	0	1.8214	0.756	0.093	0	7	COL15A1
DLK1	0	1.80578	0.59	0.054	0	7	DLK1
IGFBP71	0	1.71679	0.906	0.193	0	7	IGFBP7
IGFBP41	0	1.7105	0.875	0.196	0	7	IGFBP4
TSHZ21	0	1.67593	0.74	0.098	0	7	TSHZ2
NRK1	0	1.54201	0.694	0.109	0	7	NRK
DCN1	0	1.49394	0.96	0.232	0	7	DCN
COL1A21	0	1.3633	0.783	0.161	0	7	COL1A2
TCF211	0	1.35041	0.58	0.088	0	7	TCF21
HTRA31	0	1.3332	0.524	0.068	0	7	HTRA3
CALD11	0	1.2998	0.783	0.261	0	7	CALD1
COL3A11	0	1.26785	0.792	0.187	0	7	COL3A1
MMP21	0	1.24268	0.582	0.145	0	7	MMP2
OLFML31	0	1.24242	0.667	0.129	0	7	OLFML3
NR2F21	0	1.23083	0.685	0.144	0	7	NR2F2
HAPLN1	0	1.17351	0.37	0.023	0	7	HAPLN1
COL6A21	0	1.07512	0.631	0.136	0	7	COL6A2
LAMB1	0	1.07398	0.326	0.021	0	7	LAMB1
C71	0	1.07276	0.769	0.19	0	7	C7
SPRY1	0	1.07241	0.414	0.083	0	7	SPRY1
COL1A11	0	1.06169	0.711	0.198	0	7	COL1A1
PLAC1	0	1.05535	0.349	0.031	0	7	PLAC1
SOD31	0	1.0424	0.433	0.082	0	7	SOD3
COL6A11	0	1.02151	0.587	0.124	0	7	COL6A1
EBF11	0	1.02021	0.491	0.09	0	7	EBF1
IGF21	0	1.01268	0.773	0.209	0	7	IGF2
CHGA	0	0.989266	0.288	0.019	0	7	CHGA
DHRS21	0	0.967135	0.45	0.094	0	7	DHRS2
BGN	0	0.961599	0.283	0.02	0	7	BGN
LAMA2	0	0.947947	0.343	0.037	0	7	LAMA2
DPT1	0	0.921538	0.498	0.106	0	7	DPT
MGP1	0	0.916236	0.603	0.138	0	7	MGP
LOC1010010961	0	0.898199	0.525	0.121	0	7	LOC101001096
TMSB4X1	0	0.844466	0.877	0.416	0	7	TMSB4X
EMILIN1	0	0.817936	0.292	0.036	0	7	EMILIN1
SPARCL1	2.24357e-305	1.19192	0.795	0.415	4.89704e-301	7	SPARCL1
RND31	2.23807e-304	0.919634	0.372	0.068	4.88504e-300	7	RND3
RBMS31	5.21907e-292	0.858312	0.353	0.063	1.13917e-287	7	RBMS3
CDO1	5.09765e-289	0.770749	0.299	0.046	1.11266e-284	7	CDO1
OSR1	3.76489e-286	0.938165	0.333	0.058	8.21762e-282	7	OSR1
DSEL	2.00904e-282	0.85356	0.342	0.062	4.38513e-278	7	DSEL
TGFBR31	2.80785e-275	0.910519	0.478	0.12	6.1287e-271	7	TGFBR3
LOC1010016611	9.47527e-270	1.11018	0.622	0.227	2.06817e-265	7	LOC101001661
NBL11	1.87702e-269	1.12472	0.571	0.189	4.09697e-265	7	NBL1
TIMP11	2.95404e-268	1.20874	0.835	0.47	6.44777e-264	7	TIMP1
NDRG21	4.94621e-266	0.876671	0.418	0.094	1.07961e-261	7	NDRG2
RARRES21	5.74209e-266	0.684308	0.636	0.188	1.25333e-261	7	RARRES2
LOC1010267401	1.15239e-265	0.778761	0.421	0.093	2.51533e-261	7	LOC101026740
COL5A11	1.62235e-263	0.800988	0.327	0.059	3.5411e-259	7	COL5A1
SERPINE21	3.89509e-261	1.06005	0.689	0.298	8.50181e-257	7	SERPINE2
MFAP41	1.61838e-254	0.84586	0.315	0.057	3.53244e-250	7	MFAP4
NID1	1.07991e-238	0.703503	0.256	0.04	2.35711e-234	7	NID1
IGFBP51	4.41041e-236	1.3175	0.693	0.337	9.6266e-232	7	IGFBP5
FXYD11	3.86338e-235	0.719344	0.543	0.158	8.4326e-231	7	FXYD1
CEBPD1	7.94374e-229	1.18519	0.449	0.132	1.73388e-224	7	CEBPD
LITAF	2.52426e-227	0.719565	0.27	0.047	5.5097e-223	7	LITAF
C1S1	3.5565e-227	0.842772	0.351	0.077	7.76276e-223	7	C1S
APOD1	2.15462e-224	0.667523	0.389	0.091	4.70288e-220	7	APOD
LGALS11	5.73612e-222	0.915151	0.684	0.306	1.25202e-217	7	LGALS1
APOL4	1.90568e-219	0.805741	0.263	0.047	4.15954e-215	7	APOL4
PMP221	2.32295e-214	0.770517	0.433	0.116	5.0703e-210	7	PMP22
PKDCC	7.07692e-209	0.821193	0.289	0.06	1.54468e-204	7	PKDCC
LTBP41	1.69381e-205	0.894872	0.447	0.134	3.69707e-201	7	LTBP4
SERPINH11	4.59474e-198	0.935108	0.489	0.17	1.00289e-193	7	SERPINH1
GNG111	4.5983e-193	0.575032	0.34	0.079	1.00367e-188	7	GNG11
DLC1	2.3855e-190	0.65508	0.269	0.054	5.20684e-186	7	DLC1
SYT1	3.46911e-186	0.825682	0.357	0.097	7.57203e-182	7	SYT1
LHX91	1.32293e-183	0.702138	0.279	0.059	2.88756e-179	7	LHX9
EPHX11	2.60635e-177	0.788963	0.454	0.152	5.68887e-173	7	EPHX1
LOC1085818813	1.56276e-172	0.467298	0.985	0.911	3.41104e-168	7	LOC108581881
CLEC11A	5.07122e-167	0.764535	0.288	0.071	1.10689e-162	7	CLEC11A
SELENOP1	2.63253e-164	0.750436	0.664	0.335	5.74602e-160	7	SELENOP
IER21	1.42312e-162	0.84117	0.465	0.166	3.10624e-158	7	IER2
FUOM1	6.58581e-161	0.636136	0.294	0.072	1.43748e-156	7	FUOM
SOCS31	2.75313e-160	0.620621	0.298	0.073	6.00926e-156	7	SOCS3
IGF1	2.17331e-157	0.716132	0.253	0.057	4.74368e-153	7	IGF1
RPL102	6.26067e-157	0.381963	0.994	0.983	1.36652e-152	7	RPL10
LIFR	1.18361e-156	0.615064	0.276	0.065	2.58347e-152	7	LIFR
GASK1B	8.77405e-155	0.696333	0.265	0.063	1.91511e-150	7	GASK1B
EVA1B1	5.68742e-154	0.811972	0.526	0.229	1.24139e-149	7	EVA1B
JUNB2	4.69068e-151	0.914405	0.84	0.674	1.02383e-146	7	JUNB
TPM21	5.58587e-146	0.649289	0.383	0.128	1.21923e-141	7	TPM2
CD811	1.34786e-145	0.570684	0.872	0.697	2.94198e-141	7	CD81
LOC1085860751	4.92903e-143	0.807485	0.655	0.387	1.07586e-138	7	LOC108586075
ANXA51	1.0263e-139	0.801902	0.553	0.27	2.24011e-135	7	ANXA5
FOS2	9.14689e-137	0.785751	0.84	0.679	1.99649e-132	7	FOS
TPD52L1	3.14327e-135	0.739518	0.286	0.083	6.86081e-131	7	TPD52L1
PLPP31	1.67457e-128	0.654583	0.331	0.104	3.65508e-124	7	PLPP3
PGRMC11	2.20351e-126	0.836141	0.379	0.142	4.8096e-122	7	PGRMC1
BTG11	4.9037e-125	0.678416	0.749	0.521	1.07033e-120	7	BTG1
PTMS1	4.31855e-119	0.613705	0.807	0.663	9.4261e-115	7	PTMS
LOC116275684	6.81068e-119	0.660661	0.265	0.078	1.48657e-114	7	LOC116275684
IGFBP61	2.82244e-118	0.481753	0.311	0.096	6.16053e-114	7	IGFBP6
ITM2A1	5.29524e-116	0.575193	0.283	0.083	1.15579e-111	7	ITM2A
DKK3	8.26453e-116	0.827813	0.534	0.292	1.8039e-111	7	DKK3
AHNAK1	9.16808e-115	0.551671	0.28	0.082	2.00112e-110	7	AHNAK
CPE1	2.59124e-114	0.615725	0.264	0.076	5.6559e-110	7	CPE
LOC1010000831	8.77948e-110	0.612943	0.454	0.195	1.9163e-105	7	LOC101000083
LOC1162699451	9.85871e-106	0.731492	0.553	0.307	2.15186e-101	7	LOC116269945
MDK1	5.97872e-105	0.638206	0.28	0.091	1.30497e-100	7	MDK
LOC1010236451	7.57481e-104	0.658458	0.376	0.152	1.65335e-99	7	LOC101023645
LOC1162736241	3.61633e-101	0.703689	0.726	0.518	7.89337e-97	7	LOC116273624
LOC1010236251	7.18225e-100	0.363843	0.942	0.885	1.56767e-95	7	LOC101023625
LOC1010057291	9.47577e-100	0.606821	0.304	0.109	2.06828e-95	7	LOC101005729
ZFP36L11	2.25132e-99	0.704875	0.693	0.474	4.91396e-95	7	ZFP36L1
LHFPL61	5.5309e-95	0.471041	0.331	0.118	1.20723e-90	7	LHFPL6
C12H11orf961	8.14589e-93	1.21896	0.573	0.353	1.778e-88	7	C12H11orf96
LOC1162729531	1.37079e-91	0.647248	0.588	0.365	2.99202e-87	7	LOC116272953
FCGRT1	5.72788e-90	0.568819	0.674	0.473	1.25022e-85	7	FCGRT
PPIC1	1.94167e-89	0.682371	0.388	0.179	4.23809e-85	7	PPIC
TMEM176A1	1.5545e-85	0.584151	0.339	0.142	3.39301e-81	7	TMEM176A
LOC1010215651	3.33055e-85	0.687032	0.441	0.224	7.26959e-81	7	LOC101021565
SSPN1	3.96817e-85	0.568535	0.269	0.096	8.66132e-81	7	SSPN
BST2	4.32671e-85	0.59435	0.276	0.102	9.44391e-81	7	BST2
NTRK21	8.20507e-84	0.410584	0.296	0.105	1.79092e-79	7	NTRK2
LOC1085838641	8.79749e-84	0.609991	0.541	0.292	1.92023e-79	7	LOC108583864
ENG	1.36483e-81	0.642955	0.307	0.126	2.979e-77	7	ENG
SEC621	3.95768e-81	0.518624	0.755	0.577	8.63843e-77	7	SEC62
ZFP361	2.73514e-78	0.749249	0.384	0.187	5.96998e-74	7	ZFP36
PEG31	7.55252e-78	0.613317	0.55	0.348	1.64849e-73	7	PEG3
JUND1	6.58375e-77	0.793805	0.67	0.522	1.43703e-72	7	JUND
RPL6	7.76343e-77	0.32754	0.939	0.916	1.69452e-72	7	RPL6
NUPR11	4.29782e-76	0.466674	0.306	0.122	9.38086e-72	7	NUPR1
LOC1009971151	2.62462e-70	0.428913	0.917	0.816	5.72876e-66	7	LOC100997115
LOC1162736232	1.14098e-66	0.670765	0.659	0.486	2.49041e-62	7	LOC116273623
SELENOM1	1.27101e-65	0.523985	0.529	0.333	2.77424e-61	7	SELENOM
RPL242	3.94526e-64	0.255596	0.964	0.949	8.61132e-60	7	RPL24
INHBA1	8.57293e-64	0.411669	0.266	0.105	1.87121e-59	7	INHBA
EMP31	1.95863e-63	0.548535	0.5	0.306	4.2751e-59	7	EMP3
FKBP71	2.22755e-59	0.542262	0.328	0.163	4.86207e-55	7	FKBP7
MTUS1	7.76505e-59	0.587873	0.296	0.142	1.69488e-54	7	MTUS1
MAGED21	9.57581e-57	0.503078	0.636	0.483	2.09011e-52	7	MAGED2
LAMC3	2.49243e-56	0.702806	0.382	0.223	5.44022e-52	7	LAMC3
NPDC11	9.08415e-54	0.552502	0.341	0.183	1.9828e-49	7	NPDC1
GAPDH1	1.11647e-51	0.415214	0.712	0.601	2.43693e-47	7	GAPDH
HTRA11	1.54032e-50	0.568345	0.346	0.193	3.36205e-46	7	HTRA1
RABAC11	1.83446e-50	0.491032	0.498	0.336	4.00409e-46	7	RABAC1
NUDT4	5.1841e-49	0.550019	0.29	0.15	1.13153e-44	7	NUDT4
MAGEH11	7.72289e-48	0.536099	0.387	0.232	1.68568e-43	7	MAGEH1
TMEM176B1	6.7374e-47	0.48539	0.44	0.278	1.47057e-42	7	TMEM176B
SEPTIN71	8.26948e-46	0.421078	0.621	0.488	1.80498e-41	7	SEPTIN7
LOC1009993181	1.04325e-42	0.410364	0.569	0.43	2.27709e-38	7	LOC100999318
2023-06-02	2.1238e-42	0.335953	0.85	0.785	4.63562e-38	7	JUN
NENF1	9.48981e-41	0.437475	0.536	0.402	2.07134e-36	7	NENF
DAB2	2.75974e-40	0.482805	0.303	0.17	6.02369e-36	7	DAB2
G0S21	3.45225e-40	0.608654	0.351	0.22	7.53522e-36	7	G0S2
LOC1010266471	3.47506e-40	0.42718	0.615	0.49	7.58501e-36	7	LOC101026647
KLF22	1.08076e-39	0.521534	0.562	0.432	2.35897e-35	7	KLF2
MEST1	1.02867e-38	0.458126	0.298	0.163	2.24528e-34	7	MEST
CD631	2.90279e-36	0.331845	0.732	0.645	6.33592e-32	7	CD63
BCL2	5.52892e-36	0.484807	0.312	0.187	1.2068e-31	7	BCL2
AKAP17A	1.57888e-35	0.449919	0.264	0.147	3.44623e-31	7	AKAP17A
ITGB1	5.23731e-35	0.400131	0.61	0.495	1.14315e-30	7	ITGB1
EGR13	2.83486e-33	0.322708	0.687	0.549	6.18764e-29	7	EGR1
NSA21	2.3318e-32	0.367536	0.671	0.597	5.08962e-28	7	NSA2
PTCH2	5.18567e-31	0.525275	0.257	0.15	1.13188e-26	7	PTCH2
RRBP1	2.23061e-30	0.513206	0.312	0.199	4.86874e-26	7	RRBP1
AKAP12	2.64752e-29	0.439066	0.295	0.183	5.77874e-25	7	AKAP12
GRK4	2.20621e-28	0.421211	0.275	0.169	4.81549e-24	7	GRK4
DAP	3.15151e-27	0.418064	0.346	0.237	6.8788e-23	7	DAP
LOC1038791211	1.80951e-26	0.377786	0.364	0.255	3.94962e-22	7	LOC103879121
HSPB11	2.14779e-26	0.321336	0.305	0.187	4.68797e-22	7	HSPB1
TTC31	3.29446e-26	0.42916	0.319	0.212	7.19081e-22	7	TTC3
IFI161	5.71785e-26	0.353722	0.314	0.202	1.24803e-21	7	IFI16
BCL7C1	1.70003e-25	0.393699	0.296	0.192	3.71066e-21	7	BCL7C
FOSB2	1.80167e-25	0.333733	0.508	0.393	3.9325e-21	7	FOSB
CD302	6.08208e-25	0.408791	0.251	0.154	1.32754e-20	7	CD302
NME31	7.935e-25	0.371367	0.431	0.323	1.73197e-20	7	NME3
TCF4	1.36711e-23	0.353143	0.446	0.344	2.98399e-19	7	TCF4
LOC101024926	1.3889e-23	0.345589	0.255	0.159	3.03155e-19	7	LOC101024926
LOC101010496	2.25319e-23	0.38016	0.274	0.175	4.91803e-19	7	LOC101010496
RHOB2	2.88681e-23	0.316289	0.526	0.417	6.30104e-19	7	RHOB
TUBB1	8.70798e-23	0.263915	0.695	0.622	1.90069e-18	7	TUBB
NOVA11	1.70334e-22	0.415547	0.307	0.207	3.71787e-18	7	NOVA1
ARF1	9.86999e-22	0.311291	0.579	0.495	2.15432e-17	7	ARF1
PPP1R10	3.19161e-21	0.357655	0.324	0.228	6.96633e-17	7	PPP1R10
SPTBN12	3.85497e-21	0.343842	0.481	0.39	8.41424e-17	7	SPTBN1
IMPDH21	1.76435e-20	0.375865	0.344	0.25	3.85104e-16	7	IMPDH2
LOC1010184331	2.53023e-20	0.26769	0.721	0.666	5.52274e-16	7	LOC101018433
SSBP4	4.34795e-20	0.359399	0.273	0.182	9.49027e-16	7	SSBP4
P4HB	6.14976e-20	0.370316	0.419	0.331	1.34231e-15	7	P4HB
RNASET21	8.42905e-20	0.322561	0.455	0.364	1.83981e-15	7	RNASET2
PDLIM21	8.63549e-20	0.328148	0.374	0.283	1.88487e-15	7	PDLIM2
MFGE81	1.16461e-19	0.374423	0.253	0.164	2.542e-15	7	MFGE8
SMARCA2	1.5309e-19	0.352608	0.275	0.186	3.3415e-15	7	SMARCA2
NR4A11	6.73632e-19	0.417705	0.28	0.188	1.47034e-14	7	NR4A1
RWDD11	1.00837e-17	0.303848	0.471	0.393	2.20097e-13	7	RWDD1
CNPY2	1.11784e-16	0.336839	0.31	0.23	2.4399e-12	7	CNPY2
ITM2C	1.29052e-16	0.354064	0.373	0.295	2.81681e-12	7	ITM2C
LOC1010204791	4.06502e-16	0.292504	0.477	0.396	8.87272e-12	7	LOC101020479
LOC101000155	1.79597e-15	0.382191	0.547	0.448	3.92006e-11	7	LOC101000155
TSC22D31	4.78392e-15	0.301783	0.471	0.398	1.04419e-10	7	TSC22D3
RAB34	6.01369e-15	0.335089	0.347	0.274	1.31261e-10	7	RAB34
MTARC21	1.03318e-14	0.343481	0.286	0.21	2.25513e-10	7	MTARC2
ZFP36L2	1.7007e-14	0.419842	0.288	0.215	3.71211e-10	7	ZFP36L2
LRP1	4.77316e-14	0.362842	0.385	0.318	1.04184e-09	7	LRP1
ARL6IP51	2.35745e-13	0.250931	0.434	0.365	5.14561e-09	7	ARL6IP5
ETHE1	2.75827e-13	0.321191	0.253	0.184	6.02048e-09	7	ETHE1
NUCB2	4.02106e-13	0.330947	0.271	0.202	8.77677e-09	7	NUCB2
CTSF	4.18805e-13	0.332385	0.268	0.201	9.14126e-09	7	CTSF
EEF2	6.23989e-13	0.27149	0.596	0.551	1.36198e-08	7	EEF2
FRZB	1.94083e-12	0.387109	0.328	0.265	4.23625e-08	7	FRZB
REEP5	3.76111e-12	0.302997	0.254	0.188	8.20937e-08	7	REEP5
LMAN11	1.4812e-11	0.292912	0.312	0.251	3.23302e-07	7	LMAN1
PPP1R14A	2.20446e-11	0.263404	0.574	0.532	4.81167e-07	7	PPP1R14A
LOC103878060	2.10852e-10	0.272094	0.255	0.197	4.60226e-06	7	LOC103878060
NDN1	4.315e-10	0.25945	0.43	0.379	9.41834e-06	7	NDN
PEG101	3.69602e-09	0.284571	0.363	0.311	8.06731e-05	7	PEG10
HERPUD1	5.91301e-09	0.30577	0.251	0.2	0.000129063	7	HERPUD1
CEBPB	8.53408e-09	0.328734	0.279	0.226	0.000186273	7	CEBPB
GADD45B2	1.10304e-08	0.289395	0.282	0.225	0.000240762	7	GADD45B
APRT	3.13219e-08	0.288027	0.284	0.235	0.000683664	7	APRT
CGGBP1	3.6721e-08	0.260079	0.28	0.233	0.000801509	7	CGGBP1
DST1	5.64811e-08	0.27376	0.317	0.269	0.00123281	7	DST
AIG1	9.35237e-08	0.25374	0.27	0.224	0.00204134	7	AIG1
ARL1	6.68322e-07	0.257543	0.269	0.227	0.0145875	7	ARL1
SELENOS	5.69484e-06	0.276567	0.305	0.27	0.124301	7	SELENOS
LY6E	1.07252e-05	0.277232	0.279	0.245	0.2341	7	LY6E
TXNDC15	1.1895e-05	0.269824	0.257	0.224	0.259632	7	TXNDC15
SMAD5	2.47407e-05	0.260532	0.268	0.237	0.540016	7	SMAD5
LOC1010001551	0	1.73074	1	0.429	0	8	LOC101000155
IFI61	1.30627e-123	0.502333	0.986	0.858	2.8512e-119	8	IFI6
ISG15	3.57934e-75	0.558133	0.473	0.229	7.81262e-71	8	ISG15
TPT11	1.84541e-70	0.263423	0.999	0.988	4.02798e-66	8	TPT1
LOC1010126021	8.43408e-69	0.358609	0.94	0.769	1.84091e-64	8	LOC101012602
MARCKSL11	2.4417e-61	0.364051	0.916	0.703	5.32949e-57	8	MARCKSL1
RPL33	2.39715e-58	0.265127	0.996	0.958	5.23227e-54	8	RPL3
ATP5MF1	8.26912e-57	0.333978	0.92	0.755	1.8049e-52	8	ATP5MF
RPL281	8.34027e-57	0.256061	0.997	0.972	1.82043e-52	8	RPL28
C3H4orf483	8.71902e-55	0.348445	0.884	0.642	1.9031e-50	8	C3H4orf48
MT2A2	1.3715e-54	0.393982	0.828	0.598	2.99358e-50	8	MT2A
MT32	2.69478e-54	0.413291	0.744	0.519	5.88189e-50	8	MT3
LOC1010263841	1.07807e-52	0.340753	0.856	0.65	2.3531e-48	8	LOC101026384
ACTB1	3.44947e-50	0.283689	0.988	0.917	7.52917e-46	8	ACTB
PRDX62	4.09698e-49	0.327297	0.927	0.702	8.94247e-45	8	PRDX6
LOC1010153411	1.63378e-47	0.318017	0.869	0.694	3.56606e-43	8	LOC101015341
LOC1010017302	9.94049e-47	0.383872	0.688	0.463	2.16971e-42	8	LOC101001730
ATP5F1E1	2.4975e-46	0.294107	0.954	0.821	5.45129e-42	8	ATP5F1E
BEX11	6.33261e-46	0.391928	0.741	0.512	1.38222e-41	8	BEX1
PEBP11	1.11207e-45	0.298784	0.922	0.763	2.42732e-41	8	PEBP1
MYL61	6.59943e-45	0.288383	0.939	0.806	1.44046e-40	8	MYL6
RPL351	3.8353e-44	0.2649	0.994	0.967	8.3713e-40	8	RPL35
BEX31	9.57556e-44	0.285436	0.942	0.791	2.09006e-39	8	BEX3
FABP31	1.40372e-42	0.366809	0.516	0.308	3.0639e-38	8	FABP3
ZFAND61	4.49542e-41	0.319553	0.831	0.608	9.81216e-37	8	ZFAND6
OAS1	1.0887e-40	0.335491	0.344	0.179	2.3763e-36	8	OAS1
SLC39A41	1.35593e-40	0.316096	0.811	0.584	2.95959e-36	8	SLC39A4
LOC1162688201	1.82674e-40	0.277182	0.993	0.931	3.98722e-36	8	LOC116268820
RPS271	1.17424e-38	0.269599	0.997	0.974	2.56302e-34	8	RPS27
HPRT11	1.86527e-38	0.332583	0.577	0.372	4.07132e-34	8	HPRT1
CFL11	4.33988e-38	0.300542	0.86	0.674	9.47267e-34	8	CFL1
DYNLT11	1.605e-37	0.321507	0.723	0.513	3.50324e-33	8	DYNLT1
CALM21	9.52644e-37	0.282476	0.896	0.717	2.07934e-32	8	CALM2
LOC1010137091	8.30374e-36	0.326053	0.675	0.466	1.81246e-31	8	LOC101013709
TCEAL91	3.1636e-35	0.33062	0.829	0.634	6.90519e-31	8	TCEAL9
SKP11	3.7555e-34	0.276716	0.867	0.713	8.19714e-30	8	SKP1
SMS1	3.55354e-33	0.282548	0.724	0.522	7.75632e-29	8	SMS
CENPV2	9.00861e-33	0.283895	0.699	0.501	1.96631e-28	8	CENPV
ARPC21	1.00123e-32	0.259634	0.855	0.665	2.18537e-28	8	ARPC2
NUDT111	1.03383e-32	0.282886	0.598	0.398	2.25654e-28	8	NUDT11
RBP11	1.45205e-32	0.281022	0.788	0.576	3.16939e-28	8	RBP1
CALM31	2.25541e-32	0.261019	0.701	0.497	4.92287e-28	8	CALM3
HMGN52	2.6036e-31	0.264492	0.745	0.528	5.68288e-27	8	HMGN5
C1H1orf1221	5.32404e-31	0.309902	0.6	0.416	1.16208e-26	8	C1H1orf122
ANXA3	1.12147e-30	0.297585	0.269	0.139	2.44784e-26	8	ANXA3
LOC101016648	2.96318e-30	0.292528	0.669	0.473	6.46774e-26	8	LOC101016648
CRYL11	3.29004e-30	0.260967	0.545	0.352	7.18118e-26	8	CRYL1
GSTM31	4.13656e-30	0.274252	0.856	0.694	9.02887e-26	8	GSTM3
TCEAL51	7.34665e-30	0.311341	0.508	0.33	1.60355e-25	8	TCEAL5
RAC31	1.1604e-29	0.259537	0.542	0.354	2.53281e-25	8	RAC3
IGFBP22	2.45304e-29	0.298445	0.717	0.537	5.35426e-25	8	IGFBP2
TSTA3	1.74334e-28	0.255353	0.578	0.391	3.80519e-24	8	TSTA3
LOC1038878411	1.87473e-28	0.279319	0.76	0.567	4.09197e-24	8	LOC103887841
TOMM71	2.38873e-28	0.252439	0.952	0.82	5.21388e-24	8	TOMM7
GTF2H51	2.73494e-28	0.253607	0.605	0.413	5.96956e-24	8	GTF2H5
HYPK	3.35818e-28	0.25715	0.559	0.376	7.3299e-24	8	HYPK
RPL27A1	3.4879e-28	0.263588	0.969	0.885	7.61304e-24	8	RPL27A
RPL23A1	1.02267e-27	0.264405	0.982	0.909	2.23217e-23	8	RPL23A
LOC1010141551	2.38094e-27	0.335606	0.277	0.149	5.19689e-23	8	LOC101014155
PGAM11	4.14287e-26	0.250224	0.607	0.426	9.04265e-22	8	PGAM1
SDCBP1	4.18041e-26	0.273465	0.801	0.618	9.12458e-22	8	SDCBP
TSPO	4.30393e-26	0.255061	0.737	0.576	9.39419e-22	8	TSPO
SLIRP1	2.37665e-25	0.253737	0.792	0.607	5.18751e-21	8	SLIRP
LOC1010224331	4.06151e-25	0.276034	0.859	0.688	8.86505e-21	8	LOC101022433
LOC101015090	6.91934e-25	0.273866	0.426	0.273	1.51028e-20	8	LOC101015090
KRT8	1.29851e-24	0.277894	0.451	0.292	2.83425e-20	8	KRT8
RPL311	1.95596e-24	0.295387	0.808	0.698	4.26928e-20	8	RPL31
LOC101018365	7.33811e-23	0.267669	0.723	0.55	1.60169e-18	8	LOC101018365
RPS201	2.17209e-22	0.252807	0.942	0.827	4.74102e-18	8	RPS20
PSME2	3.0375e-20	0.259776	0.437	0.295	6.62995e-16	8	PSME2
LOC116268546	0	2.00486	0.84	0.132	0	9	LOC116268546
TNFRSF12A	0	1.01768	0.398	0.042	0	9	TNFRSF12A
S100A10	1.29682e-231	1.03231	0.86	0.464	2.83056e-227	9	S100A10
KRT19	3.93317e-216	0.744626	0.378	0.08	8.58493e-212	9	KRT19
CD9	1.40883e-150	0.622449	0.452	0.143	3.07505e-146	9	CD9
MATN2	7.55633e-149	0.554886	0.372	0.099	1.64932e-144	9	MATN2
MCAM	2.92976e-133	0.447942	0.303	0.074	6.39479e-129	9	MCAM
TIMP12	2.78405e-129	0.702187	0.795	0.476	6.07674e-125	9	TIMP1
KRT81	1.19418e-124	0.632194	0.645	0.284	2.60654e-120	9	KRT8
ANXA31	9.06908e-124	0.523823	0.407	0.133	1.97951e-119	9	ANXA3
FABP32	3.68252e-105	0.582406	0.642	0.303	8.03783e-101	9	FABP3
SERPINA52	1.23671e-92	0.577262	0.699	0.379	2.69936e-88	9	SERPINA5
SAT1	1.33933e-92	0.59871	0.789	0.496	2.92335e-88	9	SAT1
LOC1010166481	3.09562e-92	0.529607	0.781	0.469	6.7568e-88	9	LOC101016648
LOC1010153412	5.40795e-92	0.469292	0.908	0.692	1.18039e-87	9	LOC101015341
SMS2	7.63204e-91	0.502662	0.824	0.518	1.66584e-86	9	SMS
TSPO1	1.56065e-89	0.523602	0.843	0.572	3.40643e-85	9	TSPO
CCN11	4.99216e-88	0.726167	0.458	0.199	1.08964e-83	9	CCN1
MYL62	3.42739e-86	0.421902	0.961	0.806	7.48097e-82	9	MYL6
PDLIM1	2.83777e-77	0.393894	0.307	0.108	6.194e-73	9	PDLIM1
S100A11	4.33939e-77	0.509473	0.666	0.364	9.47159e-73	9	S100A11
IFI62	2.02915e-75	0.382328	0.981	0.859	4.42902e-71	9	IFI6
KRT18	4.63071e-69	0.484551	0.512	0.251	1.01074e-64	9	KRT18
CNN3	4.93972e-69	0.438036	0.663	0.368	1.07819e-64	9	CNN3
NEDD9	9.63288e-69	0.338086	0.365	0.148	2.10257e-64	9	NEDD9
APOA11	4.04411e-67	0.451424	0.734	0.459	8.82708e-63	9	APOA1
CRYL12	4.93534e-66	0.407617	0.634	0.349	1.07724e-61	9	CRYL1
GADD45G1	8.53002e-66	0.451577	0.725	0.44	1.86185e-61	9	GADD45G
ADH5	2.6544e-65	0.43742	0.667	0.391	5.79375e-61	9	ADH5
LOC1010263842	3.62042e-62	0.374689	0.884	0.649	7.90229e-58	9	LOC101026384
RAB20	1.08198e-61	0.38927	0.63	0.349	2.36164e-57	9	RAB20
PDK3	1.66389e-60	0.365489	0.4	0.182	3.63178e-56	9	PDK3
TINAGL1	2.04233e-60	0.325785	0.492	0.241	4.45779e-56	9	TINAGL1
ISYNA11	2.24804e-60	0.426682	0.809	0.542	4.9068e-56	9	ISYNA1
GPC13	4.41054e-60	0.384995	0.612	0.338	9.62689e-56	9	GPC1
TMEM1231	6.22636e-60	0.379771	0.649	0.369	1.35903e-55	9	TMEM123
ACTB2	6.97925e-59	0.33903	0.99	0.917	1.52336e-54	9	ACTB
PALMD	1.46253e-58	0.361831	0.337	0.142	3.19227e-54	9	PALMD
GADD45A	2.63177e-58	0.37459	0.361	0.159	5.74437e-54	9	GADD45A
LMNA	4.20769e-57	0.39655	0.728	0.449	9.18412e-53	9	LMNA
VIM1	8.04472e-56	0.290251	0.93	0.755	1.75592e-51	9	VIM
MT2A3	2.44704e-55	0.486351	0.835	0.598	5.34114e-51	9	MT2A
LOC1010126022	3.61483e-54	0.321343	0.955	0.769	7.89009e-50	9	LOC101012602
TESC	5.73537e-53	0.305385	0.343	0.152	1.25186e-48	9	TESC
PRNP	1.45432e-52	0.281578	0.39	0.181	3.17435e-48	9	PRNP
BEX12	1.81074e-52	0.396225	0.784	0.511	3.9523e-48	9	BEX1
IFI27L21	4.53374e-52	0.309293	0.937	0.756	9.8958e-48	9	IFI27L2
OAS11	1.83232e-51	0.302344	0.381	0.178	3.99941e-47	9	OAS1
MMP23B	4.61169e-51	0.275713	0.435	0.211	1.00659e-46	9	MMP23B
FILIP1L1	1.13962e-50	0.312801	0.412	0.202	2.48745e-46	9	FILIP1L
INHA2	1.22117e-48	0.326088	0.827	0.542	2.66545e-44	9	INHA
PADI4	1.27244e-48	0.362595	0.293	0.126	2.77735e-44	9	PADI4
ZFAND51	1.8214e-48	0.352481	0.672	0.413	3.97556e-44	9	ZFAND5
CALM22	3.15799e-48	0.334446	0.913	0.716	6.89295e-44	9	CALM2
LOC101015560	3.7089e-48	0.304843	0.834	0.588	8.09542e-44	9	LOC101015560
MRAS	4.39609e-47	0.336292	0.422	0.215	9.59534e-43	9	MRAS
LOC101024162	5.63281e-47	0.348556	0.616	0.37	1.22947e-42	9	LOC101024162
LAPTM4B1	1.8423e-46	0.322628	0.806	0.558	4.02119e-42	9	LAPTM4B
TMED3	3.28543e-45	0.324087	0.594	0.345	7.17112e-41	9	TMED3
HINT3	6.25865e-45	0.293684	0.434	0.225	1.36607e-40	9	HINT3
GNB5	8.93785e-43	0.264005	0.354	0.171	1.95086e-38	9	GNB5
LOC1010183651	1.07488e-42	0.342988	0.779	0.548	2.34613e-38	9	LOC101018365
MXRA7	5.61886e-41	0.295502	0.689	0.442	1.22643e-36	9	MXRA7
UBE2E11	2.90979e-40	0.271096	0.512	0.289	6.35119e-36	9	UBE2E1
PTOV1	1.90435e-39	0.29147	0.809	0.596	4.15663e-35	9	PTOV1
HES1	4.36594e-39	0.385286	0.651	0.433	9.52955e-35	9	HES1
FDXR	1.09437e-38	0.287364	0.686	0.437	2.38868e-34	9	FDXR
LOC1010017303	1.13304e-38	0.335848	0.701	0.463	2.47308e-34	9	LOC101001730
BCAM1	1.24785e-38	0.262252	0.754	0.497	2.72369e-34	9	BCAM
PDLIM41	1.5758e-38	0.30874	0.633	0.397	3.43951e-34	9	PDLIM4
MCFD2	2.50793e-38	0.284037	0.447	0.25	5.47406e-34	9	MCFD2
MARCKSL12	3.79171e-38	0.27274	0.905	0.704	8.27616e-34	9	MARCKSL1
RHOC	5.95682e-37	0.291753	0.599	0.374	1.30019e-32	9	RHOC
EIF4EBP11	1.27494e-36	0.272561	0.653	0.411	2.78281e-32	9	EIF4EBP1
CITED4	2.15446e-36	0.30484	0.445	0.251	4.70254e-32	9	CITED4
MT33	2.5537e-36	0.318041	0.74	0.52	5.57396e-32	9	MT3
NSG12	3.43192e-36	0.288568	0.57	0.35	7.49084e-32	9	NSG1
SUSD3	6.37339e-36	0.27448	0.486	0.279	1.39112e-31	9	SUSD3
LY6E1	1.15789e-35	0.280017	0.429	0.239	2.52732e-31	9	LY6E
MMD	3.8291e-35	0.29367	0.62	0.392	8.35778e-31	9	MMD
TUBB4B	6.41991e-35	0.301078	0.668	0.437	1.40127e-30	9	TUBB4B
TPM41	3.86005e-34	0.292888	0.821	0.591	8.42532e-30	9	TPM4
ATF3	1.19783e-33	0.263988	0.299	0.151	2.61451e-29	9	ATF3
C3H4orf484	3.65216e-33	0.255058	0.877	0.643	7.97158e-29	9	C3H4orf48
CFL12	5.04716e-33	0.263216	0.882	0.674	1.10164e-28	9	CFL1
CLIC1	1.02237e-32	0.29991	0.66	0.448	2.23153e-28	9	CLIC1
TMSB10	1.42002e-31	0.301062	0.874	0.752	3.09948e-27	9	TMSB10
ACTG1	9.33435e-31	0.292447	0.917	0.768	2.03741e-26	9	ACTG1
TXN1	3.6236e-30	0.296868	0.723	0.503	7.90924e-26	9	TXN
C20H19orf33	4.11545e-29	0.265749	0.281	0.146	8.98279e-25	9	C20H19orf33
GTF2H52	1.27504e-28	0.25612	0.622	0.412	2.78303e-24	9	GTF2H5
ARID5B	2.76061e-28	0.251712	0.615	0.411	6.02559e-24	9	ARID5B
PSME21	1.23097e-25	0.261497	0.477	0.294	2.68685e-21	9	PSME2
LOC1010001552	2.75492e-24	0.316314	0.618	0.447	6.01316e-20	9	LOC101000155
LOC1010141552	1.5916e-22	0.328687	0.266	0.15	3.47399e-18	9	LOC101014155
EGR14	0	1.57814	0.995	0.544	0	10	EGR1
CTNNB11	7.40763e-144	0.887472	0.774	0.347	1.61686e-139	10	CTNNB1
ULK42	1.19676e-123	0.78353	0.754	0.33	2.61217e-119	10	ULK4
SYNE24	2.49754e-67	0.590757	0.819	0.586	5.45137e-63	10	SYNE2
GNPTAB2	2.55486e-65	0.545081	0.559	0.261	5.57649e-61	10	GNPTAB
EIF5A1	7.22333e-65	0.542429	0.499	0.219	1.57664e-60	10	EIF5A
ST3GAL61	1.34467e-64	0.335436	0.267	0.077	2.93502e-60	10	ST3GAL6
LOC1010135862	1.56118e-62	0.552007	0.568	0.275	3.4076e-58	10	LOC101013586
FOSB3	1.79136e-61	0.592604	0.685	0.391	3.91e-57	10	FOSB
LOC1107441992	6.10385e-61	0.551914	0.604	0.307	1.33229e-56	10	LOC110744199
IQCK2	4.3053e-59	0.576154	0.445	0.187	9.39717e-55	10	IQCK
NFKBIZ	1.14186e-55	0.449786	0.329	0.119	2.49233e-51	10	NFKBIZ
MAP3K13	7.20615e-54	0.511958	0.565	0.293	1.57289e-49	10	MAP3K1
PWWP3B4	7.19252e-52	0.497779	0.672	0.383	1.56991e-47	10	PWWP3B
HLTF3	1.35223e-51	0.517264	0.782	0.517	2.95151e-47	10	HLTF
CGNL12	4.06214e-46	0.430963	0.429	0.197	8.86644e-42	10	CGNL1
HK2	4.67456e-46	0.341356	0.354	0.145	1.02032e-41	10	HK2
MAP4K42	6.797e-46	0.453509	0.512	0.262	1.48358e-41	10	MAP4K4
CCN12	1.15136e-43	0.446193	0.432	0.203	2.51308e-39	10	CCN1
MCL11	5.69618e-43	0.466081	0.654	0.398	1.24331e-38	10	MCL1
DSP2	6.73892e-43	0.395008	0.402	0.184	1.4709e-38	10	DSP
MBNL33	1.29902e-42	0.472898	0.513	0.279	2.83537e-38	10	MBNL3
INHBB4	2.48942e-42	0.473068	0.495	0.263	5.43366e-38	10	INHBB
SYT11	4.9559e-42	0.417547	0.382	0.175	1.08172e-37	10	SYT11
DUSP11	5.74305e-42	0.380819	0.676	0.394	1.25353e-37	10	DUSP1
LOC1010159203	6.78378e-41	0.405894	0.485	0.248	1.48069e-36	10	LOC101015920
KMT2C3	2.92643e-40	0.425125	0.644	0.398	6.38752e-36	10	KMT2C
CREBBP1	4.36092e-40	0.379333	0.488	0.247	9.51859e-36	10	CREBBP
GPS21	8.62791e-40	0.381311	0.615	0.358	1.88321e-35	10	GPS2
ITGA62	1.16587e-39	0.42396	0.482	0.249	2.54473e-35	10	ITGA6
NCOA2	1.38277e-39	0.394141	0.404	0.194	3.01816e-35	10	NCOA2
NR4A12	2.61033e-39	0.55543	0.388	0.188	5.69757e-35	10	NR4A1
LIMCH13	4.41702e-39	0.454607	0.573	0.324	9.64104e-35	10	LIMCH1
SPATA13	5.74112e-39	0.349413	0.374	0.172	1.25311e-34	10	SPATA13
BRD41	3.73177e-38	0.416955	0.521	0.295	8.14535e-34	10	BRD4
IRF2BPL	9.50913e-38	0.388578	0.404	0.197	2.07556e-33	10	IRF2BPL
ENDOD11	1.53912e-37	0.413111	0.477	0.253	3.35943e-33	10	ENDOD1
CADM12	1.91253e-37	0.395143	0.484	0.253	4.17448e-33	10	CADM1
TIMP2	3.66001e-37	0.421465	0.718	0.508	7.9887e-33	10	TIMP2
SERINC54	3.81973e-37	0.378805	0.616	0.367	8.33734e-33	10	SERINC5
TCAF11	4.24046e-37	0.3881	0.399	0.194	9.25566e-33	10	TCAF1
IL6ST	5.03617e-37	0.450084	0.532	0.304	1.09925e-32	10	IL6ST
LARP1	5.56313e-37	0.386407	0.398	0.194	1.21426e-32	10	LARP1
SPTBN13	7.85166e-37	0.395159	0.641	0.387	1.71378e-32	10	SPTBN1
LOC1162749011	1.36491e-36	0.373086	0.367	0.17	2.9792e-32	10	LOC116274901
MAP3K5	1.7526e-36	0.321553	0.331	0.145	3.82539e-32	10	MAP3K5
ZFHX4	5.30573e-36	0.302708	0.324	0.141	1.15808e-31	10	ZFHX4
BBX3	6.17022e-36	0.409663	0.71	0.505	1.34677e-31	10	BBX
WBP1L	6.36713e-36	0.351527	0.367	0.17	1.38975e-31	10	WBP1L
KIAA1217	1.61251e-35	0.322876	0.354	0.164	3.51962e-31	10	KIAA1217
DCBLD21	2.7373e-35	0.359589	0.421	0.213	5.9747e-31	10	DCBLD2
LGR43	3.23477e-35	0.399095	0.452	0.238	7.06054e-31	10	LGR4
KTN13	5.45327e-35	0.348098	0.841	0.679	1.19028e-30	10	KTN1
ADGRG13	7.34671e-35	0.397557	0.549	0.326	1.60357e-30	10	ADGRG1
MAP3K121	8.24249e-35	0.297595	0.303	0.129	1.79909e-30	10	MAP3K12
ZNF275	1.09403e-34	0.273814	0.293	0.125	2.38794e-30	10	ZNF275
DNAJB11	1.82191e-34	0.440323	0.396	0.195	3.97668e-30	10	DNAJB1
FAM135A	6.33347e-34	0.344551	0.348	0.163	1.38241e-29	10	FAM135A
TMEM1232	6.62374e-34	0.420828	0.599	0.374	1.44576e-29	10	TMEM123
WNK11	1.09971e-33	0.346012	0.466	0.251	2.40033e-29	10	WNK1
PRRC2C	1.79264e-33	0.261812	0.254	0.102	3.91281e-29	10	PRRC2C
SLK2	2.17731e-33	0.417806	0.474	0.265	4.75242e-29	10	SLK
IRF2BP2	2.31064e-33	0.310494	0.363	0.173	5.04342e-29	10	IRF2BP2
TEX15	2.88752e-33	0.302705	0.3	0.133	6.30258e-29	10	TEX15
NTN4	3.8895e-33	0.268994	0.34	0.156	8.4896e-29	10	NTN4
SOX94	4.23116e-33	0.402801	0.612	0.38	9.23536e-29	10	SOX9
USP132	4.40629e-33	0.325717	0.448	0.234	9.61761e-29	10	USP13
BCLAF11	7.49219e-33	0.39856	0.601	0.374	1.63532e-28	10	BCLAF1
ARAP2	8.82571e-33	0.31793	0.271	0.114	1.92639e-28	10	ARAP2
MACF11	9.14054e-33	0.409469	0.523	0.303	1.99511e-28	10	MACF1
NEDD91	1.04791e-32	0.317651	0.328	0.152	2.28728e-28	10	NEDD9
EIF4G31	1.33857e-32	0.362597	0.415	0.216	2.92171e-28	10	EIF4G3
OCRL	1.4771e-32	0.2997	0.353	0.168	3.22408e-28	10	OCRL
FNIP1	1.96661e-32	0.274513	0.29	0.126	4.29252e-28	10	FNIP1
NAV21	2.05411e-32	0.257962	0.373	0.18	4.48351e-28	10	NAV2
CDK62	3.50343e-32	0.365594	0.429	0.227	7.64693e-28	10	CDK6
ATP1B15	5.7513e-32	0.328858	0.836	0.654	1.25534e-27	10	ATP1B1
TRIM24	1.22308e-31	0.317869	0.329	0.156	2.66961e-27	10	TRIM24
ZNF4621	1.23243e-31	0.310276	0.392	0.196	2.69004e-27	10	ZNF462
FHOD33	1.30458e-31	0.376012	0.415	0.217	2.8475e-27	10	FHOD3
PTGFRN	1.37246e-31	0.386538	0.424	0.227	2.99566e-27	10	PTGFRN
NKX3-11	1.57194e-31	0.420142	0.513	0.299	3.43108e-27	10	NKX3-1
JCAD4	1.84542e-31	0.374226	0.47	0.262	4.028e-27	10	JCAD
SET1	3.55608e-31	0.40851	0.672	0.491	7.76185e-27	10	SET
RIMKLB2	4.0763e-31	0.364055	0.457	0.244	8.89733e-27	10	RIMKLB
UGCG	4.56581e-31	0.316858	0.381	0.189	9.9658e-27	10	UGCG
IGF1R3	5.47052e-31	0.372375	0.462	0.258	1.19405e-26	10	IGF1R
HUWE11	6.2304e-31	0.360108	0.443	0.241	1.35991e-26	10	HUWE1
PTBP3	6.3587e-31	0.311204	0.388	0.197	1.38791e-26	10	PTBP3
USP9X	7.97621e-31	0.290801	0.402	0.205	1.74097e-26	10	USP9X
ZBTB202	1.05039e-30	0.367142	0.694	0.482	2.29269e-26	10	ZBTB20
FOXP11	1.47527e-30	0.304651	0.423	0.222	3.22008e-26	10	FOXP1
PDLIM5	2.44913e-30	0.304703	0.331	0.157	5.34573e-26	10	PDLIM5
KPNA4	3.77677e-30	0.277442	0.334	0.159	8.24356e-26	10	KPNA4
IFI63	4.7405e-30	0.306498	0.938	0.862	1.03471e-25	10	IFI6
RALGAPA2	4.94021e-30	0.250517	0.279	0.124	1.0783e-25	10	RALGAPA2
SLC38A2	5.24149e-30	0.346339	0.445	0.24	1.14406e-25	10	SLC38A2
PKD2	9.57563e-30	0.261245	0.261	0.112	2.09007e-25	10	PKD2
TANC24	1.08215e-29	0.321773	0.418	0.224	2.36201e-25	10	TANC2
MSI21	1.41801e-29	0.330584	0.434	0.235	3.09509e-25	10	MSI2
CELF12	1.47711e-29	0.326211	0.524	0.309	3.22408e-25	10	CELF1
CTNND13	1.50746e-29	0.356249	0.574	0.348	3.29034e-25	10	CTNND1
SLF2	2.08808e-29	0.311082	0.446	0.245	4.55766e-25	10	SLF2
HELZ1	2.66342e-29	0.318616	0.406	0.213	5.81344e-25	10	HELZ
TAOK11	2.94834e-29	0.330122	0.465	0.256	6.43534e-25	10	TAOK1
SRGAP13	4.10804e-29	0.307473	0.446	0.239	8.96661e-25	10	SRGAP1
EP300	4.35144e-29	0.348393	0.368	0.19	9.49788e-25	10	EP300
PLXNC11	4.63763e-29	0.303516	0.34	0.168	1.01225e-24	10	PLXNC1
CRIM11	5.42729e-29	0.313839	0.402	0.212	1.18462e-24	10	CRIM1
CCDC61	6.47429e-29	0.336165	0.381	0.196	1.41314e-24	10	CCDC6
RYBP	1.11739e-28	0.297445	0.342	0.169	2.43894e-24	10	RYBP
ABI1	1.12004e-28	0.306935	0.388	0.202	2.44471e-24	10	ABI1
RAD213	1.52811e-28	0.358752	0.705	0.494	3.33541e-24	10	RAD21
VCL	1.69887e-28	0.273529	0.41	0.215	3.70813e-24	10	VCL
SOGA1	1.95425e-28	0.289948	0.275	0.124	4.26554e-24	10	SOGA1
HEG1	2.52101e-28	0.290643	0.289	0.133	5.50262e-24	10	HEG1
SLC35D1	2.83697e-28	0.262195	0.295	0.137	6.19225e-24	10	SLC35D1
MYO10	3.08557e-28	0.306063	0.368	0.19	6.73486e-24	10	MYO10
QKI	3.13917e-28	0.328902	0.474	0.271	6.85186e-24	10	QKI
SETD5	3.31381e-28	0.3314	0.41	0.218	7.23306e-24	10	SETD5
GOLGA41	3.98413e-28	0.370818	0.521	0.314	8.69616e-24	10	GOLGA4
RUFY33	4.45605e-28	0.320365	0.637	0.41	9.72622e-24	10	RUFY3
MED13L	5.20572e-28	0.275617	0.296	0.138	1.13625e-23	10	MED13L
REST2	5.7414e-28	0.370999	0.566	0.357	1.25318e-23	10	REST
TNRC6B2	7.95779e-28	0.345249	0.697	0.481	1.73695e-23	10	TNRC6B
STIM2	8.15887e-28	0.313684	0.328	0.163	1.78084e-23	10	STIM2
DAAM12	1.45228e-27	0.315362	0.421	0.229	3.16989e-23	10	DAAM1
TTYH3	1.47743e-27	0.280955	0.345	0.172	3.2248e-23	10	TTYH3
RAB5B	1.75052e-27	0.286394	0.314	0.153	3.82086e-23	10	RAB5B
BAZ2A	2.05428e-27	0.259056	0.293	0.138	4.48388e-23	10	BAZ2A
MAP1B2	2.10827e-27	0.383724	0.579	0.374	4.60173e-23	10	MAP1B
WDR601	2.35579e-27	0.300318	0.388	0.203	5.14198e-23	10	WDR60
NIPBL	2.66618e-27	0.340357	0.46	0.262	5.81946e-23	10	NIPBL
ADNP1	3.03162e-27	0.317679	0.471	0.272	6.61711e-23	10	ADNP
KIF5B3	3.46132e-27	0.341412	0.704	0.507	7.55502e-23	10	KIF5B
MICAL2	3.81894e-27	0.286232	0.368	0.192	8.33559e-23	10	MICAL2
SORL13	4.67098e-27	0.320269	0.502	0.299	1.01953e-22	10	SORL1
CDH3	5.8114e-27	0.271524	0.256	0.115	1.26845e-22	10	CDH3
DDX173	6.14789e-27	0.266098	0.878	0.722	1.3419e-22	10	DDX17
GTF2I1	6.98269e-27	0.338249	0.549	0.339	1.52411e-22	10	GTF2I
ARID2	7.54862e-27	0.268771	0.296	0.14	1.64764e-22	10	ARID2
ARHGAP5	9.67775e-27	0.286851	0.392	0.208	2.11236e-22	10	ARHGAP5
PPP1R9A	1.1122e-26	0.263676	0.314	0.154	2.42761e-22	10	PPP1R9A
LOC116275740	1.16477e-26	0.253497	0.278	0.128	2.54235e-22	10	LOC116275740
MYO64	1.26e-26	0.339872	0.571	0.359	2.75021e-22	10	MYO6
TRRAP	1.30621e-26	0.254436	0.343	0.174	2.85106e-22	10	TRRAP
BPTF1	2.2507e-26	0.357767	0.568	0.371	4.9126e-22	10	BPTF
FHOD12	2.46574e-26	0.347941	0.365	0.191	5.38196e-22	10	FHOD1
TMPO	2.84829e-26	0.295961	0.427	0.233	6.21697e-22	10	TMPO
PHACTR2	4.72985e-26	0.348606	0.64	0.435	1.03238e-21	10	PHACTR2
POGZ1	5.19873e-26	0.359005	0.438	0.248	1.13473e-21	10	POGZ
ATF7IP	7.25412e-26	0.294263	0.424	0.233	1.58336e-21	10	ATF7IP
SPTAN13	8.17815e-26	0.328414	0.546	0.344	1.78504e-21	10	SPTAN1
FMNL22	1.12493e-25	0.289806	0.413	0.229	2.45539e-21	10	FMNL2
AMOTL2	1.89923e-25	0.280429	0.331	0.168	4.14546e-21	10	AMOTL2
ERBB32	2.07339e-25	0.279206	0.368	0.194	4.52559e-21	10	ERBB3
LOC1010093131	2.28679e-25	0.289274	0.326	0.165	4.99137e-21	10	LOC101009313
JADE11	2.58884e-25	0.277672	0.331	0.168	5.65066e-21	10	JADE1
RIMS4	2.83391e-25	0.259738	0.385	0.206	6.18557e-21	10	RIMS4
NRIP1	4.25091e-25	0.260952	0.342	0.178	9.27845e-21	10	NRIP1
KIF1B	5.40978e-25	0.298888	0.348	0.18	1.18079e-20	10	KIF1B
ESPN4	8.62369e-25	0.293994	0.443	0.25	1.88229e-20	10	ESPN
USP47	8.67501e-25	0.250694	0.402	0.22	1.89349e-20	10	USP47
ZMAT12	1.05488e-24	0.273235	0.329	0.168	2.30249e-20	10	ZMAT1
MCF2	1.11687e-24	0.286493	0.357	0.188	2.43779e-20	10	MCF2
ZNF2921	1.31573e-24	0.332284	0.476	0.284	2.87184e-20	10	ZNF292
CDH21	1.50205e-24	0.272903	0.41	0.228	3.27853e-20	10	CDH2
RNF38	1.70677e-24	0.280646	0.314	0.158	3.72536e-20	10	RNF38
TJP11	1.92293e-24	0.348	0.56	0.371	4.19718e-20	10	TJP1
PCDH11X1	2.16558e-24	0.268808	0.357	0.187	4.7268e-20	10	PCDH11X
PRKAR2B	2.27146e-24	0.341167	0.321	0.167	4.95791e-20	10	PRKAR2B
ARHGEF3	2.64765e-24	0.260598	0.367	0.194	5.77903e-20	10	ARHGEF3
DDR1	2.99026e-24	0.261409	0.37	0.196	6.52685e-20	10	DDR1
PHF24	3.37617e-24	0.283145	0.412	0.228	7.36917e-20	10	PHF24
CUX1	3.90944e-24	0.30941	0.365	0.199	8.53314e-20	10	CUX1
C12H11orf962	4.40829e-24	0.261916	0.56	0.359	9.62198e-20	10	C12H11orf96
PHIP1	5.91465e-24	0.35474	0.479	0.281	1.29099e-19	10	PHIP
TMEM971	7.07804e-24	0.33476	0.488	0.298	1.54492e-19	10	TMEM97
SRSF103	9.49905e-24	0.323945	0.666	0.463	2.07336e-19	10	SRSF10
RB1CC11	9.72389e-24	0.289692	0.438	0.255	2.12243e-19	10	RB1CC1
IP6K1	1.96249e-23	0.271022	0.39	0.217	4.28352e-19	10	IP6K1
DDX52	2.17534e-23	0.324728	0.827	0.648	4.74812e-19	10	DDX5
BOD1L1	4.05499e-23	0.338321	0.544	0.352	8.85082e-19	10	BOD1L1
TAX1BP11	4.14895e-23	0.317637	0.568	0.376	9.05591e-19	10	TAX1BP1
SLC26A22	4.16631e-23	0.284368	0.39	0.219	9.0938e-19	10	SLC26A2
LOC1162717243	9.13795e-23	0.306383	0.501	0.302	1.99454e-18	10	LOC116271724
ANKRD111	1.07336e-22	0.30883	0.476	0.292	2.34283e-18	10	ANKRD11
PPP1R13L	1.38267e-22	0.25405	0.32	0.167	3.01796e-18	10	PPP1R13L
HP1BP3	1.44021e-22	0.281743	0.518	0.32	3.14355e-18	10	HP1BP3
ARMH41	1.48921e-22	0.310789	0.337	0.181	3.2505e-18	10	ARMH4
AKAP11	1.52956e-22	0.256864	0.31	0.16	3.33857e-18	10	AKAP11
KAT6B	1.66814e-22	0.291126	0.379	0.212	3.64106e-18	10	KAT6B
BRWD1	3.08428e-22	0.262475	0.282	0.141	6.73205e-18	10	BRWD1
PEAK1	4.03187e-22	0.267985	0.253	0.123	8.80036e-18	10	PEAK1
TNS3	4.9802e-22	0.273929	0.271	0.136	1.08703e-17	10	TNS3
TTC17	6.80159e-22	0.271395	0.292	0.149	1.48458e-17	10	TTC17
PURB	8.40456e-22	0.263195	0.365	0.201	1.83446e-17	10	PURB
FAM107B	8.80625e-22	0.2821	0.457	0.279	1.92214e-17	10	FAM107B
YWHAG	1.49556e-21	0.266281	0.296	0.154	3.26437e-17	10	YWHAG
PPP1CB1	1.70748e-21	0.29127	0.551	0.364	3.72691e-17	10	PPP1CB
LOC103882502	1.83836e-21	0.28231	0.282	0.143	4.01259e-17	10	LOC103882502
TSPYL11	2.6806e-21	0.267481	0.544	0.346	5.85095e-17	10	TSPYL1
ABI21	2.72686e-21	0.277411	0.427	0.252	5.95191e-17	10	ABI2
MMD1	2.90743e-21	0.306704	0.594	0.395	6.34604e-17	10	MMD
ELAVL1	3.36653e-21	0.250332	0.392	0.223	7.34813e-17	10	ELAVL1
FOXO3	4.59598e-21	0.280569	0.365	0.204	1.00317e-16	10	FOXO3
FOXO1	6.28743e-21	0.278103	0.349	0.192	1.37236e-16	10	FOXO1
TRA2A1	7.23228e-21	0.314403	0.537	0.346	1.57859e-16	10	TRA2A
CXXC51	7.55043e-21	0.285077	0.546	0.36	1.64803e-16	10	CXXC5
RAD23B	7.92866e-21	0.255212	0.44	0.26	1.73059e-16	10	RAD23B
GOLGB11	8.33349e-21	0.336315	0.466	0.297	1.81895e-16	10	GOLGB1
ZFAND52	9.73886e-21	0.291494	0.607	0.418	2.1257e-16	10	ZFAND5
UBA1	2.17188e-20	0.25939	0.452	0.275	4.74055e-16	10	UBA1
ATRX1	2.34246e-20	0.298815	0.552	0.368	5.11289e-16	10	ATRX
APLP2	2.35512e-20	0.274277	0.562	0.367	5.14051e-16	10	APLP2
ATP1A1	2.57269e-20	0.264314	0.501	0.319	5.6154e-16	10	ATP1A1
EIF3A1	2.59285e-20	0.259988	0.426	0.251	5.65942e-16	10	EIF3A
SMC64	3.4575e-20	0.282308	0.529	0.342	7.54668e-16	10	SMC6
MAP4	4.59149e-20	0.26962	0.378	0.217	1.00218e-15	10	MAP4
PKN2	4.99689e-20	0.299343	0.52	0.336	1.09067e-15	10	PKN2
KLF13	5.41356e-20	0.255334	0.309	0.168	1.18162e-15	10	KLF13
CTNNAL12	8.2751e-20	0.273902	0.605	0.412	1.80621e-15	10	CTNNAL1
SERINC31	1.04276e-19	0.282629	0.504	0.321	2.27602e-15	10	SERINC3
GNG71	1.27726e-19	0.263861	0.468	0.292	2.78787e-15	10	GNG7
MBOAT73	1.40733e-19	0.251177	0.504	0.319	3.07177e-15	10	MBOAT7
SEC14L1	1.44043e-19	0.260206	0.345	0.192	3.14403e-15	10	SEC14L1
USP37	1.59164e-19	0.261869	0.312	0.171	3.47407e-15	10	USP37
ETNK2	2.64003e-19	0.25779	0.523	0.333	5.76238e-15	10	ETNK2
DST2	3.36937e-19	0.272872	0.431	0.267	7.35432e-15	10	DST
FAM20C1	5.92065e-19	0.273319	0.406	0.243	1.2923e-14	10	FAM20C
ITPRID22	5.96309e-19	0.266626	0.417	0.253	1.30156e-14	10	ITPRID2
TRA2B1	7.58414e-19	0.298127	0.696	0.514	1.65539e-14	10	TRA2B
CCND2	1.15962e-18	0.306259	0.53	0.356	2.53111e-14	10	CCND2
LENG8	1.80322e-18	0.267226	0.326	0.183	3.93589e-14	10	LENG8
AKAP92	1.90756e-18	0.272795	0.64	0.454	4.16362e-14	10	AKAP9
THUMPD1	2.46305e-18	0.261046	0.468	0.297	5.3761e-14	10	THUMPD1
GCC21	3.62493e-18	0.265862	0.52	0.355	7.91215e-14	10	GCC2
PUM11	6.7042e-18	0.286879	0.42	0.262	1.46333e-13	10	PUM1
PTP4A2	1.07171e-17	0.281362	0.629	0.45	2.33922e-13	10	PTP4A2
HERC5	1.32919e-17	0.290856	0.399	0.246	2.90123e-13	10	HERC5
APP1	1.54448e-17	0.275717	0.69	0.516	3.37114e-13	10	APP
YWHAE1	1.57577e-17	0.277484	0.604	0.423	3.43944e-13	10	YWHAE
CALR1	2.43194e-17	0.260498	0.783	0.64	5.30819e-13	10	CALR
GATA4	6.92483e-17	0.253289	0.587	0.408	1.51148e-12	10	GATA4
LOC1038810652	7.91333e-17	0.252541	0.607	0.421	1.72724e-12	10	LOC103881065
PCM1	8.247e-17	0.269493	0.388	0.237	1.80007e-12	10	PCM1
FBXO21	2.41096e-16	0.280973	0.49	0.329	5.26239e-12	10	FBXO21
CHD1	3.89141e-16	0.259316	0.331	0.196	8.49378e-12	10	CHD1
EIF4G2	4.16345e-16	0.266324	0.594	0.445	9.08757e-12	10	EIF4G2
WASL	7.58664e-16	0.279339	0.562	0.4	1.65594e-11	10	WASL
SMARCA5	2.37331e-15	0.293719	0.523	0.369	5.18021e-11	10	SMARCA5
ERBIN	5.48287e-15	0.256974	0.259	0.145	1.19675e-10	10	ERBIN
NUCKS1	6.19684e-14	0.256217	0.719	0.604	1.35259e-09	10	NUCKS1
AMD1	1.36191e-13	0.270258	0.566	0.414	2.97263e-09	10	AMD1
SRPK2	2.37587e-12	0.251856	0.505	0.358	5.18582e-08	10	SRPK2
LOC101006785	2.56461e-12	0.261976	0.643	0.537	5.59778e-08	10	LOC101006785
SRSF71	3.27926e-10	0.275729	0.641	0.506	7.15764e-06	10	SRSF7
PTGDS	0	2.65736	0.998	0.286	0	11	PTGDS
MT2A4	5.89658e-37	0.495584	0.835	0.603	1.28705e-32	11	MT2A
AMH3	1.64147e-33	0.359091	0.957	0.843	3.58283e-29	11	AMH
BSG1	2.97178e-25	0.370511	0.828	0.633	6.4865e-21	11	BSG
WFDC2	3.44735e-24	0.382578	0.298	0.132	7.52452e-20	11	WFDC2
PLA2G1B2	1.184e-23	0.303769	0.919	0.806	2.58432e-19	11	PLA2G1B
SPOCK2	3.62491e-22	0.315362	0.492	0.277	7.91209e-18	11	SPOCK2
IGFBP23	2.84938e-21	0.373344	0.736	0.541	6.21934e-17	11	IGFBP2
GAS62	4.78564e-21	0.295824	0.91	0.721	1.04456e-16	11	GAS6
LOC1010126023	6.74479e-20	0.261985	0.912	0.774	1.47219e-15	11	LOC101012602
C20H19orf331	1.08599e-19	0.343209	0.305	0.148	2.37039e-15	11	C20H19orf33
KRT181	9.7392e-19	0.370253	0.445	0.258	2.12578e-14	11	KRT18
BCAM2	1.26409e-18	0.298156	0.738	0.503	2.75912e-14	11	BCAM
LOC1010141553	7.9447e-18	0.404759	0.305	0.152	1.73409e-13	11	LOC101014155
NSG13	3.06223e-17	0.280205	0.567	0.355	6.68393e-13	11	NSG1
MT34	5.39322e-17	0.330228	0.711	0.525	1.17718e-12	11	MT3
ATP1B16	1.05415e-15	0.269351	0.851	0.656	2.3009e-11	11	ATP1B1
MGAT4B	1.52231e-15	0.278044	0.325	0.176	3.32275e-11	11	MGAT4B
SPINT21	2.01767e-15	0.282157	0.747	0.591	4.40396e-11	11	SPINT2
LOC110741266	5.25807e-15	0.277791	0.393	0.23	1.14768e-10	11	LOC110741266
ENHO1	1.03369e-14	0.27402	0.526	0.338	2.25624e-10	11	ENHO
CLDN3	2.50518e-14	0.257435	0.33	0.186	5.46805e-10	11	CLDN3
PHGDH	3.74302e-14	0.252446	0.512	0.325	8.16989e-10	11	PHGDH
SOX41	6.20865e-14	0.269948	0.716	0.525	1.35516e-09	11	SOX4
TACSTD2	6.76692e-14	0.320772	0.354	0.206	1.47702e-09	11	TACSTD2
SH3BP5	4.45709e-13	0.272678	0.519	0.348	9.72848e-09	11	SH3BP5
CTSV3	5.3551e-13	0.265054	0.553	0.369	1.16886e-08	11	CTSV
DCXR2	9.64566e-13	0.25683	0.6	0.423	2.10536e-08	11	DCXR
PPP1R14B1	1.4188e-12	0.274607	0.528	0.367	3.09681e-08	11	PPP1R14B
ETNK21	3.571e-11	0.271916	0.492	0.335	7.79443e-07	11	ETNK2
CD91	7.73293e-11	0.264767	0.266	0.153	1.68787e-06	11	CD9
CD74	0	3.30148	0.794	0.013	0	12	CD74
RBP7	0	3.00543	0.809	0.006	0	12	RBP7
EGFL7	0	2.73368	0.879	0.017	0	12	EGFL7
GNG112	0	2.60498	0.871	0.081	0	12	GNG11
VWF	0	2.45779	0.747	0.005	0	12	VWF
APOD2	0	2.44581	0.753	0.097	0	12	APOD
CAV1	0	2.38542	0.747	0.011	0	12	CAV1
CLDN5	0	2.26091	0.721	0.002	0	12	CLDN5
SOX18	0	2.22785	0.709	0.003	0	12	SOX18
SRGN	0	2.18771	0.771	0.016	0	12	SRGN
CD320	0	2.10428	0.756	0.116	0	12	CD320
GPIHBP1	0	2.04663	0.641	0.021	0	12	GPIHBP1
TM4SF1	0	1.96506	0.682	0.006	0	12	TM4SF1
TAGLN2	0	1.95493	0.762	0.08	0	12	TAGLN2
RAMP2	0	1.94235	0.765	0.062	0	12	RAMP2
TNFSF10	0	1.80455	0.656	0.01	0	12	TNFSF10
LOC101021633	0	1.74669	0.782	0.124	0	12	LOC101021633
LOC101018551	0	1.72904	0.574	0.02	0	12	LOC101018551
LOC116268485	0	1.65097	0.497	0.007	0	12	LOC116268485
CALCRL	0	1.64768	0.597	0.021	0	12	CALCRL
ECSCR	0	1.6171	0.653	0.002	0	12	ECSCR
PODXL	0	1.61644	0.582	0.002	0	12	PODXL
EMCN	0	1.61483	0.632	0.001	0	12	EMCN
ADGRL4	0	1.61465	0.609	0.001	0	12	ADGRL4
TMEM88	0	1.61157	0.597	0.017	0	12	TMEM88
RAMP3	0	1.60918	0.571	0.006	0	12	RAMP3
AQP1	0	1.58268	0.509	0.003	0	12	AQP1
CLEC14A	0	1.58154	0.588	0.008	0	12	CLEC14A
LIFR1	0	1.58029	0.606	0.068	0	12	LIFR
LOC103883612	0	1.55137	0.526	0.006	0	12	LOC103883612
ESAM	0	1.54985	0.612	0.003	0	12	ESAM
PSMB9	0	1.53782	0.641	0.045	0	12	PSMB9
NFIB	0	1.53157	0.621	0.047	0	12	NFIB
SOX17	0	1.52448	0.5	0.005	0	12	SOX17
C1H1orf115	0	1.52266	0.65	0.057	0	12	C1H1orf115
EFNA1	0	1.4987	0.591	0.024	0	12	EFNA1
RGCC	0	1.4663	0.409	0.01	0	12	RGCC
ETS1	0	1.46474	0.559	0.048	0	12	ETS1
EPAS1	0	1.4248	0.571	0.043	0	12	EPAS1
MYCT1	0	1.37152	0.541	0.002	0	12	MYCT1
LOC101021493	0	1.3545	0.526	0.034	0	12	LOC101021493
PSMB8	0	1.35304	0.6	0.04	0	12	PSMB8
CD93	0	1.32143	0.497	0.001	0	12	CD93
PTP4A3	0	1.30196	0.506	0.02	0	12	PTP4A3
TGFBR2	0	1.29955	0.524	0.016	0	12	TGFBR2
APLNR	0	1.27704	0.432	0.001	0	12	APLNR
ARHGAP29	0	1.27689	0.556	0.036	0	12	ARHGAP29
LPAR6	0	1.26464	0.515	0.02	0	12	LPAR6
SLCO2B1	0	1.2646	0.5	0.008	0	12	SLCO2B1
ABCB1	0	1.26372	0.462	0.004	0	12	ABCB1
PECAM1	0	1.25979	0.421	0.002	0	12	PECAM1
ETS2	0	1.25502	0.479	0.012	0	12	ETS2
CAV2	0	1.25385	0.571	0.025	0	12	CAV2
DEPP1	0	1.2236	0.362	0.003	0	12	DEPP1
ELK3	0	1.21932	0.509	0.018	0	12	ELK3
S100A16	0	1.20137	0.544	0.04	0	12	S100A16
GIMAP4	0	1.17816	0.453	0.003	0	12	GIMAP4
PDGFB	0	1.16738	0.465	0.019	0	12	PDGFB
KANK3	0	1.16276	0.485	0.002	0	12	KANK3
LMO2	0	1.16104	0.462	0.007	0	12	LMO2
LOC103880102	0	1.16002	0.459	0.001	0	12	LOC103880102
CYYR1	0	1.14103	0.471	0.001	0	12	CYYR1
TIE1	0	1.1337	0.474	0.001	0	12	TIE1
ADAM15	0	1.12667	0.476	0.028	0	12	ADAM15
TRIM22	0	1.12629	0.538	0.027	0	12	TRIM22
EMP1	0	1.12123	0.409	0.002	0	12	EMP1
DOCK9	0	1.09614	0.453	0.035	0	12	DOCK9
PTPRB	0	1.08338	0.435	0.001	0	12	PTPRB
CD36	0	1.08226	0.415	0.026	0	12	CD36
FAM167B	0	1.07453	0.362	0.001	0	12	FAM167B
CDH5	0	1.06791	0.438	0	0	12	CDH5
JAG1	0	1.03226	0.406	0.028	0	12	JAG1
ADGRF5	0	1.01914	0.385	0.002	0	12	ADGRF5
KDR	0	1.01361	0.326	0.001	0	12	KDR
NIBAN1	0	1.01059	0.403	0.01	0	12	NIBAN1
CRIP2	0	0.98952	0.429	0.032	0	12	CRIP2
SMAD1	0	0.98568	0.432	0.019	0	12	SMAD1
LOC116275312	0	0.970813	0.418	0.007	0	12	LOC116275312
GIMAP1	0	0.96344	0.394	0.003	0	12	GIMAP1
LOC101020671	0	0.943171	0.412	0.012	0	12	LOC101020671
ITGA1	0	0.895548	0.385	0.026	0	12	ITGA1
LOC116273246	0	0.891438	0.344	0.009	0	12	LOC116273246
GMFG	0	0.888967	0.341	0.008	0	12	GMFG
PLXND1	0	0.883158	0.382	0.019	0	12	PLXND1
FAM110D	0	0.877363	0.332	0.008	0	12	FAM110D
CCM2L	0	0.873657	0.368	0.002	0	12	CCM2L
C9H12orf75	0	0.840118	0.335	0.019	0	12	C9H12orf75
MMRN2	0	0.832464	0.332	0.001	0	12	MMRN2
DYSF	0	0.830769	0.3	0.004	0	12	DYSF
LOC101026217	0	0.824037	0.391	0.023	0	12	LOC101026217
RASSF3	0	0.814804	0.329	0.006	0	12	RASSF3
CX3CL1	0	0.812539	0.282	0.009	0	12	CX3CL1
FLT1	0	0.80423	0.368	0.003	0	12	FLT1
ST3GAL1	0	0.789344	0.335	0.009	0	12	ST3GAL1
PLCB1	0	0.785712	0.288	0.007	0	12	PLCB1
PRKCH	0	0.785143	0.347	0.003	0	12	PRKCH
ABCG2	0	0.782674	0.315	0.006	0	12	ABCG2
GRB10	0	0.781729	0.335	0.005	0	12	GRB10
LOC110742924	0	0.776862	0.321	0.002	0	12	LOC110742924
ROBO4	0	0.769077	0.321	0.001	0	12	ROBO4
LOC110744090	0	0.75714	0.294	0	0	12	LOC110744090
THY1	0	0.748738	0.288	0.011	0	12	THY1
C1QTNF5	0	0.744576	0.353	0.009	0	12	C1QTNF5
SNCG	0	0.7431	0.326	0.016	0	12	SNCG
GIMAP6	0	0.728658	0.321	0.002	0	12	GIMAP6
EFNB2	0	0.727247	0.312	0.007	0	12	EFNB2
FAM89A	0	0.724051	0.312	0.008	0	12	FAM89A
ERG	0	0.710076	0.309	0.001	0	12	ERG
FLI1	0	0.698147	0.3	0.001	0	12	FLI1
MCF2L	0	0.693529	0.271	0.004	0	12	MCF2L
PTPRM	0	0.692621	0.329	0.011	0	12	PTPRM
NMB	0	0.681755	0.309	0.006	0	12	NMB
GBP1	0	0.678233	0.276	0.008	0	12	GBP1
GRASP	0	0.676382	0.315	0.012	0	12	GRASP
CDA	0	0.672398	0.282	0.002	0	12	CDA
AFAP1L1	0	0.669112	0.288	0.001	0	12	AFAP1L1
LOC101016024	0	0.666227	0.268	0.002	0	12	LOC101016024
MECOM	0	0.663788	0.274	0.001	0	12	MECOM
CASP10	0	0.662405	0.256	0.002	0	12	CASP10
RPS6KA2	0	0.657821	0.294	0.005	0	12	RPS6KA2
LOC101001046	0	0.652072	0.321	0.016	0	12	LOC101001046
MFNG	0	0.648112	0.3	0.003	0	12	MFNG
SASH1	0	0.639723	0.312	0.007	0	12	SASH1
TEK	0	0.637417	0.312	0.001	0	12	TEK
GGT5	0	0.630092	0.259	0.011	0	12	GGT5
SHROOM4	0	0.626327	0.259	0.01	0	12	SHROOM4
SMTN	0	0.614953	0.274	0.01	0	12	SMTN
AHR	0	0.594504	0.256	0.007	0	12	AHR
LRRC8C	0	0.587049	0.268	0.011	0	12	LRRC8C
MYOF	0	0.5516	0.265	0.006	0	12	MYOF
LIMS2	0	0.550105	0.282	0.011	0	12	LIMS2
CTTNBP2	0	0.545873	0.265	0.005	0	12	CTTNBP2
MSN	3.72711e-299	0.952411	0.415	0.032	8.13516e-295	12	MSN
IGFBP72	2.43977e-298	2.35151	0.926	0.22	5.32529e-294	12	IGFBP7
ID3	1.30099e-289	2.24525	0.7	0.11	2.83967e-285	12	ID3
LOC116273051	1.11955e-286	1.62393	0.791	0.143	2.44364e-282	12	LOC116273051
NES	7.7392e-286	0.710008	0.253	0.012	1.68924e-281	12	NES
LOC101011798	3.6203e-281	0.639148	0.259	0.012	7.90202e-277	12	LOC101011798
CLIC2	9.71565e-277	0.750567	0.371	0.027	2.12063e-272	12	CLIC2
LOC103876647	1.70077e-272	1.0072	0.479	0.048	3.71226e-268	12	LOC103876647
LOC116272783	1.32104e-271	2.5726	0.944	0.3	2.88344e-267	12	LOC116272783
HSPG2	1.80542e-271	1.70808	0.694	0.112	3.94068e-267	12	HSPG2
APOL41	1.40987e-269	1.05109	0.503	0.051	3.07733e-265	12	APOL4
CLIC4	1.44823e-268	0.950344	0.438	0.04	3.16104e-264	12	CLIC4
VPS35L	2.01464e-267	1.18802	0.521	0.059	4.39736e-263	12	VPS35L
CHRNA7	2.4973e-267	0.584371	0.265	0.014	5.45087e-263	12	CHRNA7
MYO1B	2.74732e-260	0.651942	0.259	0.014	5.99658e-256	12	MYO1B
PXDN	7.32184e-259	0.662677	0.274	0.015	1.59814e-254	12	PXDN
LOC1010000832	2.36455e-256	1.85875	0.862	0.199	5.16111e-252	12	LOC101000083
SP100	1.69192e-245	0.555516	0.274	0.016	3.69296e-241	12	SP100
TMSB4X2	1.82934e-243	2.89795	0.985	0.432	3.99289e-239	12	TMSB4X
EMP2	1.27775e-235	0.737913	0.409	0.039	2.78894e-231	12	EMP2
ID1	1.09409e-232	2.0066	0.6	0.096	2.38807e-228	12	ID1
LOC101009503	2.28398e-230	1.90422	0.8	0.201	4.98524e-226	12	LOC101009503
AHNAK2	1.54644e-226	1.10771	0.6	0.085	3.37542e-222	12	AHNAK
LDB2	5.9253e-223	0.665091	0.315	0.024	1.29331e-218	12	LDB2
CAVIN21	4.27518e-217	1.16948	0.556	0.076	9.33143e-213	12	CAVIN2
LOC116273535	1.18264e-215	0.65625	0.271	0.019	2.58134e-211	12	LOC116273535
GAL	2.87397e-214	0.687326	0.324	0.027	6.27302e-210	12	GAL
LOC101014185	3.01464e-212	1.91941	0.879	0.301	6.58006e-208	12	LOC101014185
TNS2	9.33366e-211	0.736269	0.397	0.041	2.03726e-206	12	TNS2
STOM	1.15548e-206	0.895154	0.444	0.053	2.52208e-202	12	STOM
GPR146	3.80453e-205	0.71177	0.303	0.025	8.30415e-201	12	GPR146
FXYD5	2.15156e-201	0.983334	0.506	0.072	4.69621e-197	12	FXYD5
ENG1	1.16311e-195	1.30782	0.656	0.128	2.53873e-191	12	ENG
ABCC4	4.70817e-193	0.695873	0.303	0.026	1.02765e-188	12	ABCC4
LOC101002482	1.74845e-189	1.01741	0.444	0.057	3.81635e-185	12	LOC101002482
SOCS2	1.38793e-184	0.648767	0.332	0.032	3.02943e-180	12	SOCS2
CSGALNACT1	1.36776e-182	0.704151	0.347	0.036	2.98541e-178	12	CSGALNACT1
LOC1010155601	4.34043e-179	1.97586	0.941	0.592	9.47386e-175	12	LOC101015560
LOC116272574	3.42582e-173	0.447954	0.259	0.021	7.47754e-169	12	LOC116272574
LOC116275302	1.63228e-172	0.760303	0.344	0.038	3.56277e-168	12	LOC116275302
CPNE2	7.53912e-172	0.534731	0.276	0.024	1.64556e-167	12	CPNE2
HOMER2	4.40893e-171	0.508558	0.271	0.024	9.62337e-167	12	HOMER2
LOC101025279	1.21218e-165	0.651538	0.326	0.035	2.64582e-161	12	LOC101025279
CAVIN3	2.70155e-165	0.703783	0.412	0.054	5.89667e-161	12	CAVIN3
SHC1	3.30223e-162	0.96925	0.512	0.087	7.20777e-158	12	SHC1
CFH	1.87273e-160	0.839367	0.409	0.057	4.08761e-156	12	CFH
VIM2	1.89335e-159	1.55334	0.982	0.759	4.13261e-155	12	VIM
TMEM204	1.68386e-154	0.608768	0.265	0.025	3.67536e-150	12	TMEM204
CTHRC1	1.73478e-154	1.14691	0.497	0.089	3.7865e-150	12	CTHRC1
IER22	2.02116e-154	1.15794	0.712	0.174	4.41159e-150	12	IER2
NPDC12	2.28451e-153	1.23119	0.697	0.183	4.98639e-149	12	NPDC1
SLC9A3R2	4.0336e-153	1.63592	0.682	0.188	8.80413e-149	12	SLC9A3R2
ZEB1	3.24129e-152	0.605573	0.353	0.043	7.07476e-148	12	ZEB1
CARD16	5.0488e-149	0.550243	0.271	0.026	1.102e-144	12	CARD16
RRAS	3.1565e-147	0.713	0.341	0.042	6.88968e-143	12	RRAS
LGALS3	1.65253e-145	0.539011	0.309	0.035	3.60697e-141	12	LGALS3
IFI162	1.84635e-144	1.31865	0.709	0.2	4.03002e-140	12	IFI16
B2M	1.30472e-143	1.88613	0.929	0.585	2.84781e-139	12	B2M
SOCS32	5.18758e-140	0.940241	0.468	0.079	1.13229e-135	12	SOCS3
GASK1B1	9.21407e-139	0.856941	0.432	0.068	2.01115e-134	12	GASK1B
FZD4	2.52676e-136	0.701504	0.365	0.052	5.51515e-132	12	FZD4
TCIM	5.49829e-135	0.585356	0.35	0.046	1.20011e-130	12	TCIM
S100A101	5.50982e-135	1.45318	0.879	0.474	1.20263e-130	12	S100A10
TGM2	5.66723e-135	0.820567	0.388	0.061	1.23699e-130	12	TGM2
HOXD9	2.15828e-134	0.543491	0.344	0.045	4.71087e-130	12	HOXD9
MRTFB	6.60303e-132	0.806165	0.394	0.063	1.44124e-127	12	MRTFB
TMSB101	2.00214e-130	1.27952	0.979	0.754	4.37007e-126	12	TMSB10
ASAP1	7.69231e-127	0.613411	0.315	0.041	1.679e-122	12	ASAP1
UCP2	2.16956e-126	0.581761	0.262	0.029	4.7355e-122	12	UCP2
IGFBP42	5.05018e-126	0.984829	0.771	0.223	1.1023e-121	12	IGFBP4
PLK2	1.62609e-125	0.567343	0.279	0.033	3.54926e-121	12	PLK2
SH3BGRL3	4.59059e-124	0.983897	0.591	0.148	1.00199e-119	12	SH3BGRL3
LOC1162729532	1.18514e-123	1.63064	0.821	0.37	2.5868e-119	12	LOC116272953
ITM2A2	1.57238e-122	0.810694	0.474	0.088	3.43202e-118	12	ITM2A
PPP3CA	2.79164e-120	0.773895	0.468	0.092	6.0933e-116	12	PPP3CA
IRF1	1.91332e-118	0.722206	0.318	0.045	4.17621e-114	12	IRF1
SPARCL11	1.03306e-117	1.45272	0.829	0.428	2.25487e-113	12	SPARCL1
TAP1	1.04668e-117	0.606945	0.306	0.042	2.28459e-113	12	TAP1
LOC100997583	3.55195e-117	1.14741	0.385	0.071	7.75284e-113	12	LOC100997583
DHRS3	8.08462e-117	0.674856	0.326	0.047	1.76463e-112	12	DHRS3
PALM2AKAP2	1.74774e-116	0.820642	0.438	0.086	3.81478e-112	12	PALM2AKAP2
VSIR	2.53523e-116	0.773186	0.388	0.067	5.53365e-112	12	VSIR
HSPB12	3.04672e-113	1.11219	0.65	0.187	6.65007e-109	12	HSPB1
BTG12	1.08289e-112	1.21461	0.888	0.527	2.36362e-108	12	BTG1
MAPK3	1.51771e-112	0.478376	0.276	0.036	3.3127e-108	12	MAPK3
CRIP1	1.84882e-112	0.966365	0.421	0.082	4.03541e-108	12	CRIP1
S100A61	3.00305e-112	1.06838	0.479	0.099	6.55475e-108	12	S100A6
PPP2R5A	3.74793e-111	0.821926	0.453	0.094	8.18061e-107	12	PPP2R5A
EHD4	5.03603e-111	0.912208	0.403	0.078	1.09921e-106	12	EHD4
LRRFIP1	1.82535e-110	0.782885	0.406	0.078	3.98419e-106	12	LRRFIP1
BACE2	7.58916e-110	0.705955	0.406	0.076	1.65649e-105	12	BACE2
LOC101016766	3.33576e-108	0.668079	0.294	0.043	7.28096e-104	12	LOC101016766
MEF2C	7.82118e-106	1.24026	0.662	0.222	1.70713e-101	12	MEF2C
LUZP1	7.83773e-105	0.606981	0.362	0.064	1.71074e-100	12	LUZP1
NUAK1	9.36793e-104	0.782001	0.382	0.074	2.04474e-99	12	NUAK1
KITLG	1.16244e-101	0.545599	0.274	0.039	2.53726e-97	12	KITLG
LOC1010266472	9.03755e-98	1.15263	0.85	0.492	1.97263e-93	12	LOC101026647
ARHGDIB	9.10175e-98	0.431603	0.253	0.033	1.98664e-93	12	ARHGDIB
LY6E2	1.09817e-96	1.03353	0.679	0.24	2.39699e-92	12	LY6E
FOSL2	1.12043e-96	0.50934	0.259	0.036	2.44556e-92	12	FOSL2
COL15A12	1.50452e-95	0.713815	0.521	0.122	3.28392e-91	12	COL15A1
DUSP6	7.90985e-95	0.670872	0.318	0.055	1.72648e-90	12	DUSP6
KLF4	8.76468e-92	0.818076	0.426	0.096	1.91307e-87	12	KLF4
TM4SF18	3.48595e-91	1.02503	0.612	0.206	7.60879e-87	12	TM4SF18
CCDC85B	6.79525e-87	1.07606	0.732	0.325	1.4832e-82	12	CCDC85B
IQGAP1	2.50989e-86	0.836361	0.524	0.151	5.47834e-82	12	IQGAP1
VAMP5	3.03663e-86	0.897562	0.529	0.158	6.62806e-82	12	VAMP5
SNRK	3.92831e-86	0.556621	0.329	0.063	8.57431e-82	12	SNRK
OAS3	2.08863e-84	0.498124	0.294	0.052	4.55885e-80	12	OAS3
NAA38	2.60633e-84	0.981745	0.691	0.281	5.68883e-80	12	NAA38
LOC101022333	3.44187e-84	1.13636	0.418	0.107	7.51256e-80	12	LOC101022333
LOC101001352	2.77635e-82	0.521646	0.329	0.064	6.05994e-78	12	LOC101001352
PAM	2.7969e-82	0.449676	0.291	0.05	6.10479e-78	12	PAM
PLS3	9.01466e-82	0.579951	0.303	0.056	1.96763e-77	12	PLS3
ZFP362	1.02898e-81	1.35932	0.562	0.192	2.24596e-77	12	ZFP36
ZBTB161	5.59129e-81	0.462779	0.35	0.069	1.22041e-76	12	ZBTB16
PML	1.31631e-79	0.508369	0.318	0.062	2.87312e-75	12	PML
HOXD4	7.88081e-79	0.360598	0.279	0.047	1.72014e-74	12	HOXD4
RPS281	1.60684e-78	0.489628	1	0.984	3.50725e-74	12	RPS28
LOC101012036	1.22574e-77	0.642184	0.4	0.096	2.67543e-73	12	LOC101012036
ARL151	1.61991e-77	0.83881	0.562	0.179	3.53578e-73	12	ARL15
NET1	5.10275e-77	0.730393	0.362	0.082	1.11378e-72	12	NET1
RBMS32	5.89389e-77	0.449532	0.359	0.074	1.28646e-72	12	RBMS3
CTBP2	9.12408e-75	0.715288	0.438	0.118	1.99151e-70	12	CTBP2
GYPC	1.37491e-73	0.634982	0.406	0.102	3.00102e-69	12	GYPC
CD151	1.41054e-73	0.799461	0.556	0.183	3.07879e-69	12	CD151
IFIT1	9.47645e-73	0.907087	0.441	0.125	2.06842e-68	12	IFIT1
GSN1	7.69603e-72	0.793195	0.412	0.104	1.67981e-67	12	GSN
CCN2	1.35005e-71	0.644138	0.326	0.071	2.94675e-67	12	CCN2
SYNE1	7.84731e-71	0.929732	0.379	0.098	1.71283e-66	12	SYNE1
CLEC3B1	2.0694e-70	0.379366	0.374	0.084	4.51688e-66	12	CLEC3B
BST21	6.40577e-70	0.583581	0.415	0.106	1.39819e-65	12	BST2
CASKIN2	1.43544e-69	0.595738	0.35	0.083	3.13313e-65	12	CASKIN2
TCF41	4.51578e-69	0.944842	0.709	0.344	9.85659e-65	12	TCF4
SEC14L11	6.96778e-67	0.835681	0.538	0.191	1.52086e-62	12	SEC14L1
S100A13	8.24601e-66	0.600714	0.429	0.119	1.79986e-61	12	S100A13
LOC101021715	2.07068e-65	0.635098	0.376	0.099	4.51968e-61	12	LOC101021715
SAT11	3.67038e-65	1.2198	0.8	0.503	8.01133e-61	12	SAT1
TPD52L11	1.65901e-64	0.519735	0.362	0.089	3.62113e-60	12	TPD52L1
F11R	2.38685e-64	0.553698	0.335	0.08	5.20978e-60	12	F11R
LOC101018895	2.506e-64	1.12899	0.535	0.201	5.46985e-60	12	LOC101018895
LAMA5	4.73659e-63	0.549607	0.279	0.059	1.03386e-58	12	LAMA5
S100A111	1.43946e-62	0.827462	0.732	0.371	3.14191e-58	12	S100A11
KIAA0355	2.38419e-62	0.813754	0.509	0.178	5.20397e-58	12	KIAA0355
IGFBP62	2.41039e-62	0.744479	0.391	0.102	5.26116e-58	12	IGFBP6
RBPMS	2.77384e-62	0.366538	0.297	0.062	6.05447e-58	12	RBPMS
MCAM1	2.08937e-61	0.629997	0.326	0.079	4.56046e-57	12	MCAM
SORBS3	2.75867e-61	0.411264	0.297	0.066	6.02134e-57	12	SORBS3
CPNE8	7.85847e-61	0.438539	0.259	0.052	1.71527e-56	12	CPNE8
ARHGAP18	2.06427e-60	0.520426	0.318	0.077	4.50568e-56	12	ARHGAP18
EBF12	2.68245e-60	0.332723	0.412	0.106	5.85498e-56	12	EBF1
IFIT3	1.43401e-59	0.831736	0.538	0.202	3.13002e-55	12	IFIT3
MAP3K111	5.49816e-58	0.528184	0.397	0.116	1.20008e-53	12	MAP3K11
CD2AP	3.14173e-57	0.476233	0.335	0.087	6.85745e-53	12	CD2AP
ZFP36L12	3.58383e-57	0.91476	0.771	0.481	7.82242e-53	12	ZFP36L1
ZFP36L21	4.01848e-57	0.852391	0.541	0.214	8.77113e-53	12	ZFP36L2
WWTR1	5.75774e-57	0.667826	0.441	0.142	1.25674e-52	12	WWTR1
ORAI1	5.95653e-57	0.589099	0.341	0.091	1.30013e-52	12	ORAI1
FAM13C	8.2874e-57	0.580296	0.326	0.083	1.80889e-52	12	FAM13C
NOSTRIN	1.4916e-55	0.745366	0.526	0.201	3.25571e-51	12	NOSTRIN
MAML2	1.74154e-54	0.440275	0.3	0.074	3.80126e-50	12	MAML2
SERPING1	2.75407e-54	0.586406	0.465	0.151	6.01131e-50	12	SERPING1
DUSP23	3.32942e-54	0.728	0.432	0.145	7.26713e-50	12	DUSP23
IRF7	3.94521e-54	0.568129	0.265	0.061	8.61122e-50	12	IRF7
LOC1010236452	4.04965e-54	0.582493	0.476	0.159	8.83918e-50	12	LOC101023645
DIPK1B	1.08416e-53	0.474322	0.262	0.059	2.3664e-49	12	DIPK1B
CDC42EP5	1.16488e-52	0.463984	0.294	0.073	2.54259e-48	12	CDC42EP5
UTRN	2.39388e-51	0.786393	0.453	0.162	5.22511e-47	12	UTRN
MIPEP	6.54173e-51	0.432215	0.303	0.078	1.42786e-46	12	MIPEP
RASAL2	1.0092e-50	0.561839	0.388	0.121	2.20277e-46	12	RASAL2
MOB2	1.86005e-50	0.61605	0.468	0.167	4.05992e-46	12	MOB2
STAT3	2.759e-50	0.4356	0.329	0.089	6.02206e-46	12	STAT3
PITPNA	3.67001e-48	0.410534	0.271	0.068	8.01052e-44	12	PITPNA
LOC116273462	3.85966e-48	0.532039	0.376	0.117	8.42449e-44	12	LOC116273462
TSPAN14	1.24852e-47	0.474395	0.285	0.075	2.72515e-43	12	TSPAN14
TSPAN4	1.68866e-47	0.652061	0.529	0.217	3.68583e-43	12	TSPAN4
LPCAT2	4.19462e-47	0.597991	0.347	0.107	9.1556e-43	12	LPCAT2
SPTLC2	2.34557e-46	0.478082	0.326	0.096	5.11967e-42	12	SPTLC2
CAPN2	4.35157e-46	0.472439	0.306	0.085	9.49818e-42	12	CAPN2
MDK2	4.76482e-46	0.466949	0.338	0.097	1.04002e-41	12	MDK
YBX3	5.31244e-46	0.655978	0.524	0.215	1.15955e-41	12	YBX3
KLF23	1.46493e-45	0.689875	0.738	0.435	3.19749e-41	12	KLF2
GADD45B3	1.81102e-45	0.810564	0.529	0.224	3.95292e-41	12	GADD45B
COL4A1	1.81619e-45	0.760188	0.421	0.153	3.96421e-41	12	COL4A1
AOPEP	5.81971e-45	0.635494	0.4	0.142	1.27027e-40	12	AOPEP
LOC1162736242	4.71648e-44	0.843215	0.847	0.524	1.02947e-39	12	LOC116273624
MAP1LC3A	1.22556e-43	0.545662	0.406	0.141	2.67502e-39	12	MAP1LC3A
SVIP	1.87284e-43	0.551876	0.35	0.112	4.08786e-39	12	SVIP
LOC101014638	4.22936e-43	0.383268	0.253	0.064	9.23142e-39	12	LOC101014638
LOC1010010962	4.52165e-43	0.726449	0.409	0.138	9.86942e-39	12	LOC101001096
HELZ2	1.27532e-42	0.441265	0.271	0.073	2.78365e-38	12	HELZ2
GUK1	4.48859e-42	0.616082	0.497	0.206	9.79724e-38	12	GUK1
TNFRSF1A	7.07605e-42	0.344903	0.268	0.071	1.54449e-37	12	TNFRSF1A
PIM3	1.33415e-41	0.454598	0.262	0.07	2.91205e-37	12	PIM3
YES1	2.03881e-41	0.47142	0.315	0.096	4.45011e-37	12	YES1
TGFBR32	5.1099e-41	0.392149	0.406	0.135	1.11534e-36	12	TGFBR3
IFNGR1	6.75169e-41	0.585019	0.368	0.126	1.47369e-36	12	IFNGR1
LOC101024360	8.52448e-41	0.434221	0.341	0.111	1.86064e-36	12	LOC101024360
MAST4	2.97758e-40	0.403989	0.276	0.079	6.49917e-36	12	MAST4
BCAM3	5.40241e-40	0.644319	0.782	0.504	1.17918e-35	12	BCAM
IFNAR1	1.17626e-39	0.534804	0.421	0.157	2.56742e-35	12	IFNAR1
PCBD1	2.1643e-39	0.389619	0.344	0.111	4.72402e-35	12	PCBD1
SETX	2.23016e-39	0.571925	0.382	0.137	4.86777e-35	12	SETX
LOC100999492	2.64717e-39	0.399535	0.297	0.089	5.77799e-35	12	LOC100999492
EHD1	3.23839e-39	0.474849	0.259	0.072	7.06844e-35	12	EHD1
SEC11C	7.06698e-39	0.488677	0.309	0.096	1.54251e-34	12	SEC11C
SYPL11	1.1035e-38	0.593752	0.547	0.252	2.4086e-34	12	SYPL1
SPATS2L	1.57134e-38	0.36751	0.321	0.101	3.42977e-34	12	SPATS2L
CTNNBIP1	4.48543e-38	0.470809	0.268	0.078	9.79034e-34	12	CTNNBIP1
FKBP9	7.58458e-38	0.417042	0.329	0.107	1.65549e-33	12	FKBP9
DAB21	1.06221e-37	0.501683	0.441	0.173	2.31849e-33	12	DAB2
SLC52A2	1.83447e-37	0.433731	0.294	0.091	4.00409e-33	12	SLC52A2
LOC1010067851	2.31402e-37	0.709798	0.771	0.537	5.05081e-33	12	LOC101006785
PEA15	8.39264e-37	0.322528	0.294	0.09	1.83186e-32	12	PEA15
NRP2	3.26218e-36	0.542572	0.271	0.083	7.12036e-32	12	NRP2
EGLN1	3.54764e-36	0.563706	0.447	0.187	7.74344e-32	12	EGLN1
UACA	5.80527e-36	0.532357	0.371	0.137	1.26712e-31	12	UACA
EPSTI1	1.48551e-35	0.444855	0.329	0.111	3.24243e-31	12	EPSTI1
RHOB3	1.77242e-35	0.625328	0.694	0.419	3.86865e-31	12	RHOB
IFI44	1.84343e-35	0.465286	0.306	0.101	4.02366e-31	12	IFI44
ZNF706	2.47234e-35	0.544346	0.576	0.276	5.39639e-31	12	ZNF706
IFIT2	3.63631e-35	0.469258	0.306	0.1	7.93697e-31	12	IFIT2
NUDT3	6.25867e-35	0.431279	0.418	0.165	1.36608e-30	12	NUDT3
CALCOCO2	6.42323e-35	0.455564	0.415	0.162	1.402e-30	12	CALCOCO2
GNAI2	7.23658e-35	0.584376	0.553	0.274	1.57953e-30	12	GNAI2
CPD	1.32371e-34	0.412256	0.318	0.108	2.88927e-30	12	CPD
CAVIN1	1.7669e-34	0.620921	0.585	0.31	3.8566e-30	12	CAVIN1
RGS3	2.28981e-34	0.487013	0.441	0.181	4.99796e-30	12	RGS3
DBI	3.99849e-34	0.47997	0.403	0.158	8.7275e-30	12	DBI
HYAL2	1.22097e-33	0.55363	0.385	0.152	2.66502e-29	12	HYAL2
SLC30A1	2.25974e-33	0.346644	0.262	0.081	4.93233e-29	12	SLC30A1
LOC1009993182	2.85689e-33	0.597912	0.706	0.433	6.23574e-29	12	LOC100999318
NCK1	4.79405e-33	0.473223	0.379	0.148	1.0464e-28	12	NCK1
PALMD1	1.47736e-32	0.503278	0.374	0.147	3.22463e-28	12	PALMD
CPEB4	5.97423e-32	0.332779	0.294	0.099	1.30399e-27	12	CPEB4
KLF9	6.46383e-32	0.324588	0.285	0.094	1.41086e-27	12	KLF9
CEBPD2	9.98672e-32	0.348511	0.385	0.145	2.1798e-27	12	CEBPD
MRRF	1.48747e-31	0.347086	0.294	0.099	3.24669e-27	12	MRRF
ATL2	3.15228e-31	0.335579	0.282	0.094	6.88049e-27	12	ATL2
TTC28	1.3718e-30	0.313634	0.332	0.12	2.99422e-26	12	TTC28
TJP12	1.61e-30	0.701752	0.615	0.373	3.51416e-26	12	TJP1
GNAQ	2.91826e-30	0.406546	0.365	0.145	6.36969e-26	12	GNAQ
FAM171A1	3.29231e-30	0.385689	0.315	0.114	7.18612e-26	12	FAM171A1
PLEKHO1	4.21582e-30	0.400393	0.279	0.095	9.20187e-26	12	PLEKHO1
MXD4	4.35931e-30	0.349795	0.303	0.108	9.51507e-26	12	MXD4
SERPINH12	6.96167e-30	0.335956	0.438	0.183	1.51952e-25	12	SERPINH1
CARD10	1.4256e-29	0.360916	0.253	0.082	3.11166e-25	12	CARD10
EVA1B2	1.90866e-29	0.472482	0.506	0.24	4.16603e-25	12	EVA1B
SPTBN14	2.21129e-29	0.539979	0.665	0.39	4.82659e-25	12	SPTBN1
PTMA1	2.22568e-29	0.392175	0.926	0.903	4.858e-25	12	PTMA
OAZ2	2.23199e-29	0.521294	0.488	0.232	4.87176e-25	12	OAZ2
SH3GLB1	2.72752e-29	0.430716	0.435	0.189	5.95335e-25	12	SH3GLB1
SUB1	5.82646e-29	0.514472	0.718	0.468	1.27174e-24	12	SUB1
JAM2	6.96959e-29	0.548663	0.485	0.24	1.52125e-24	12	JAM2
ARL2	1.54426e-28	0.462579	0.459	0.21	3.37066e-24	12	ARL2
MX1	1.55524e-28	0.548466	0.318	0.124	3.39463e-24	12	MX1
CD92	1.78772e-28	0.565099	0.368	0.152	3.90205e-24	12	CD9
PFKL	3.57334e-28	0.322429	0.315	0.116	7.79952e-24	12	PFKL
ATP1B3	1.21305e-27	0.291412	0.265	0.089	2.64773e-23	12	ATP1B3
PSME22	1.58047e-27	0.497861	0.559	0.297	3.44969e-23	12	PSME2
LOC1162736233	2.66439e-27	0.773115	0.765	0.491	5.81557e-23	12	LOC116273623
MGLL	9.41683e-27	0.588696	0.435	0.208	2.05541e-22	12	MGLL
AFDN	9.75743e-27	0.415866	0.45	0.211	2.12976e-22	12	AFDN
ERBIN1	1.44447e-26	0.383825	0.356	0.145	3.15285e-22	12	ERBIN
BTG2	2.51988e-26	0.556675	0.359	0.155	5.50014e-22	12	BTG2
LEPROT	6.78055e-26	0.342294	0.382	0.161	1.47999e-21	12	LEPROT
LOC101018472	1.91951e-25	0.428881	0.397	0.178	4.18971e-21	12	LOC101018472
LOC101003015	2.47428e-25	0.303807	0.291	0.108	5.40061e-21	12	LOC101003015
CMPK1	2.54265e-25	0.356099	0.259	0.091	5.54985e-21	12	CMPK1
GTF3A	3.36539e-25	0.415526	0.356	0.151	7.34565e-21	12	GTF3A
GAPDH2	3.5032e-25	0.479322	0.788	0.604	7.64644e-21	12	GAPDH
MGMT	5.7898e-25	0.351121	0.294	0.112	1.26374e-20	12	MGMT
ARRDC3	6.78661e-25	0.367001	0.262	0.094	1.48131e-20	12	ARRDC3
PDCD4	7.11605e-25	0.482972	0.426	0.203	1.55322e-20	12	PDCD4
LOC101018493	9.74272e-25	0.402821	0.512	0.261	2.12654e-20	12	LOC101018493
LOC103876646	2.76547e-24	0.480058	0.503	0.263	6.03618e-20	12	LOC103876646
AKAP121	3.15215e-24	0.371817	0.409	0.186	6.88021e-20	12	AKAP12
BMPR2	3.20119e-24	0.445746	0.326	0.136	6.98724e-20	12	BMPR2
RALB	3.48851e-24	0.430818	0.332	0.141	7.61438e-20	12	RALB
[truncated: 2,046 more rows]

## Sheet: Fig. 1B - Rhesus
	p_val	avg_logFC	pct.1	pct.2	p_val_adj	cluster	gene
IGF2	0	0.740048	0.995	0.765	0	0	IGF2
C7	0	0.67117	0.731	0.428	0	0	C7
MFAP4	0	0.657533	0.562	0.298	0	0	MFAP4
VIM	0	0.46101	0.892	0.793	0	0	VIM
DCN	0	0.443417	0.92	0.631	0	0	DCN
APOE	0	0.401403	0.972	0.874	0	0	APOE
RPL24	0	0.370807	0.987	0.956	0	0	RPL24
RPL10	0	0.297631	0.998	0.992	0	0	RPL10
RPL37	0	0.276161	0.998	0.984	0	0	RPL37
TXNIP	1.36143e-277	0.516467	0.737	0.519	2.24649e-273	0	TXNIP
COL1A1	1.58823e-254	0.321019	0.76	0.484	2.62074e-250	0	COL1A1
FTL	3.91961e-239	0.250133	0.97	0.949	6.46775e-235	0	FTL
COL6A2	5.87881e-228	0.465286	0.647	0.414	9.70062e-224	0	COL6A2
NPM1	4.66561e-226	0.381622	0.856	0.794	7.69873e-222	0	NPM1
FXYD1	7.31737e-216	0.548722	0.468	0.261	1.20744e-211	0	FXYD1
TSC22D3	3.34206e-200	0.577064	0.604	0.436	5.51473e-196	0	TSC22D3
PMP22	7.81274e-169	0.457284	0.484	0.292	1.28918e-164	0	PMP22
ENSMMUG00000061824	8.70412e-165	0.25279	0.978	0.965	1.43627e-160	0	ENSMMUG00000061824
NDRG2	3.68837e-157	0.489155	0.434	0.259	6.08617e-153	0	NDRG2
DPT	2.51021e-153	0.460068	0.478	0.299	4.1421e-149	0	DPT
EIF4A2	6.59855e-143	0.343976	0.793	0.742	1.08883e-138	0	EIF4A2
FXYD6	3.15177e-139	0.358572	0.709	0.6	5.20073e-135	0	FXYD6
SPOCK3	1.01953e-136	0.480984	0.32	0.172	1.68233e-132	0	SPOCK3
ENSMMUG00000058919	2.74e-134	0.415882	0.621	0.499	4.52127e-130	0	ENSMMUG00000058919
RAMP2	3.44409e-131	0.45486	0.35	0.199	5.6831e-127	0	RAMP2
LTBP4	1.04028e-129	0.4299	0.473	0.313	1.71657e-125	0	LTBP4
SFRP1	4.28142e-124	0.45522	0.379	0.23	7.06477e-120	0	SFRP1
TGFBR3	3.46489e-109	0.422301	0.411	0.27	5.71742e-105	0	TGFBR3
RARRES2	7.83519e-108	0.302062	0.733	0.62	1.29289e-103	0	RARRES2
EMP3	1.07358e-107	0.370934	0.546	0.414	1.77152e-103	0	EMP3
S100A6	2.21396e-107	0.349253	0.52	0.367	3.65325e-103	0	S100A6
NTRK2	2.62445e-96	0.412381	0.284	0.163	4.33061e-92	0	NTRK2
C1S	5.46935e-93	0.364622	0.458	0.32	9.02498e-89	0	C1S
CCNI	5.15175e-88	0.304899	0.672	0.604	8.50091e-84	0	CCNI
EIF3E	2.59689e-84	0.329363	0.626	0.555	4.28512e-80	0	EIF3E
PPAP2B	2.65975e-84	0.375183	0.47	0.342	4.38886e-80	0	PPAP2B
MFAP2	4.97383e-77	0.387657	0.258	0.154	8.20731e-73	0	MFAP2
SRPX	2.42069e-73	0.353431	0.299	0.189	3.99439e-69	0	SRPX
RNASE4	2.24281e-72	0.364454	0.381	0.272	3.70087e-68	0	RNASE4
COL3A1	8.65328e-71	0.258378	0.415	0.291	1.42788e-66	0	COL3A1
ENSMMUG00000013257	1.70107e-68	0.349772	0.413	0.302	2.80693e-64	0	ENSMMUG00000013257
PLAC9	5.13139e-66	0.315339	0.418	0.307	8.4673e-62	0	PLAC9
FSTL1	3.84871e-65	0.375979	0.337	0.238	6.35076e-61	0	FSTL1
ENSMMUG00000064792	2.39283e-63	0.338623	0.466	0.374	3.94841e-59	0	ENSMMUG00000064792
RPL22L1	2.04898e-61	0.252724	0.706	0.663	3.38103e-57	0	RPL22L1
HTRA1	3.87851e-56	0.317557	0.393	0.297	6.39993e-52	0	HTRA1
NR2F2	1.02723e-54	0.304896	0.36	0.264	1.69504e-50	0	NR2F2
SERPINE2	9.18953e-54	0.301213	0.528	0.441	1.51636e-49	0	SERPINE2
MEST	1.22633e-50	0.291221	0.377	0.287	2.02356e-46	0	MEST
PNISR	1.67637e-49	0.25301	0.602	0.534	2.76617e-45	0	PNISR
NOVA1	5.41736e-48	0.33678	0.306	0.222	8.93919e-44	0	NOVA1
KDELR1	5.44041e-45	0.281779	0.504	0.453	8.97723e-41	0	KDELR1
VGLL4	1.03945e-41	0.315776	0.388	0.32	1.7152e-37	0	VGLL4
RSL24D1	2.14664e-41	0.260943	0.496	0.444	3.54217e-37	0	RSL24D1
CTSC	3.85788e-36	0.30041	0.268	0.199	6.3659e-32	0	CTSC
SQSTM1	5.87305e-35	0.300579	0.358	0.298	9.69112e-31	0	SQSTM1
TCF21	1.57673e-34	0.255385	0.264	0.192	2.60176e-30	0	TCF21
SAT2	4.30048e-33	0.255104	0.462	0.411	7.09622e-29	0	SAT2
DHRS2	8.92975e-28	0.257286	0.266	0.202	1.4735e-23	0	DHRS2
GLUL	1.18885e-26	0.252582	0.343	0.29	1.96172e-22	0	GLUL
IP6K2	1.34884e-26	0.292983	0.321	0.27	2.22573e-22	0	IP6K2
DDIT4	2.56319e-22	0.288913	0.275	0.229	4.22953e-18	0	DDIT4
NFIC	3.12057e-20	0.269656	0.302	0.26	5.14925e-16	0	NFIC
EIF4B	2.62321e-18	0.25757	0.278	0.239	4.32855e-14	0	EIF4B
ENSMMUG00000028699	0	1.75908	1	0.968	0	1	ENSMMUG00000028699
SOX9	0	1.62336	0.704	0.089	0	1	SOX9
AMH	0	1.49094	0.971	0.407	0	1	AMH
ENSMMUG00000061125	0	1.47718	0.998	0.676	0	1	ENSMMUG00000061125
SYNE2	0	1.40864	0.632	0.094	0	1	SYNE2
MYO6	0	1.37159	0.535	0.049	0	1	MYO6
DDX24	0	1.36224	0.895	0.317	0	1	DDX24
BBX	0	1.32627	0.775	0.224	0	1	BBX
KIF5B	0	1.26436	0.753	0.205	0	1	KIF5B
CTSV	0	1.25615	0.582	0.114	0	1	CTSV
CITED1	0	1.22967	0.737	0.2	0	1	CITED1
HLTF	0	1.15688	0.532	0.095	0	1	HLTF
ADGRG1	0	1.15478	0.525	0.076	0	1	ADGRG1
C1H1orf141	0	1.14971	0.401	0.029	0	1	C1H1orf141
GADD45G	0	1.10862	0.489	0.114	0	1	GADD45G
TF	0	1.09985	0.604	0.115	0	1	TF
SERPINA5	0	1.09881	0.742	0.194	0	1	SERPINA5
DDX5	0	1.09204	0.933	0.528	0	1	DDX5
ZNF33A	0	1.08766	0.486	0.074	0	1	ZNF33A
HMGN5	0	1.07682	0.735	0.216	0	1	HMGN5
CLEC18A	0	1.07228	0.388	0.039	0	1	CLEC18A
CLU	0	1.0666	0.959	0.495	0	1	CLU
GAS6	0	1.05784	0.859	0.336	0	1	GAS6
COL9A1	0	1.05483	0.415	0.043	0	1	COL9A1
CCDC69	0	1.05408	0.512	0.09	0	1	CCDC69
INHA	0	1.05114	0.89	0.322	0	1	INHA
MAP1B	0	1.04778	0.612	0.156	0	1	MAP1B
RIMS4	0	1.02265	0.388	0.033	0	1	RIMS4
PHF24	0	1.02257	0.397	0.037	0	1	PHF24
CTNNAL1	0	1.02085	0.66	0.174	0	1	CTNNAL1
FAM20C	0	1.01396	0.378	0.03	0	1	FAM20C
ENSMMUG00000016490	0	0.998817	0.796	0.273	0	1	ENSMMUG00000016490
TSPYL2	0	0.988122	0.516	0.132	0	1	TSPYL2
C4orf48	0	0.965616	0.693	0.199	0	1	C4orf48
GATM	0	0.951329	0.708	0.2	0	1	GATM
ATP1B1	0	0.949555	0.717	0.266	0	1	ATP1B1
GNPTAB	0	0.947334	0.382	0.041	0	1	GNPTAB
HERC5	0	0.939422	0.384	0.05	0	1	HERC5
CDH2	0	0.923649	0.347	0.03	0	1	CDH2
MICAL2	0	0.910335	0.352	0.035	0	1	MICAL2
GUCY1A1	0	0.903289	0.361	0.041	0	1	GUCY1A1
DHH	0	0.90227	0.337	0.028	0	1	DHH
TCEAL5	0	0.901978	0.505	0.12	0	1	TCEAL5
APOA1	0	0.898988	0.79	0.276	0	1	APOA1
BAZ1A	0	0.896453	0.344	0.051	0	1	BAZ1A
CCN1	0	0.89623	0.367	0.078	0	1	CCN1
RAD21	0	0.891254	0.655	0.224	0	1	RAD21
HK2	0	0.883657	0.314	0.025	0	1	HK2
SCG5	0	0.879222	0.533	0.122	0	1	SCG5
CST9L	0	0.865585	0.34	0.065	0	1	CST9L
REEP6	0	0.862963	0.58	0.15	0	1	REEP6
ENSMMUG00000053539	0	0.860368	0.687	0.209	0	1	ENSMMUG00000053539
SPTAN1	0	0.857074	0.425	0.087	0	1	SPTAN1
GPRC5B	0	0.854816	0.364	0.05	0	1	GPRC5B
FAM122B	0	0.841723	0.314	0.04	0	1	FAM122B
ZFAND5	0	0.838244	0.592	0.205	0	1	ZFAND5
DDX17	0	0.83481	0.919	0.544	0	1	DDX17
ENSMMUG00000056220	0	0.832622	0.369	0.063	0	1	ENSMMUG00000056220
NDRG4	0	0.821904	0.363	0.073	0	1	NDRG4
PMEL	0	0.814539	0.431	0.09	0	1	PMEL
DDR1	0	0.808756	0.351	0.053	0	1	DDR1
MAP3K21	0	0.803671	0.268	0.013	0	1	MAP3K21
CLDN3	0	0.803529	0.36	0.057	0	1	CLDN3
MLXIPL	0	0.80352	0.251	0.01	0	1	MLXIPL
CXXC5	0	0.799704	0.457	0.113	0	1	CXXC5
INHBB	0	0.796655	0.273	0.017	0	1	INHBB
VCL	0	0.790529	0.34	0.057	0	1	VCL
NDUFB9	0	0.78392	0.749	0.355	0	1	NDUFB9
ENSMMUG00000053320	0	0.783531	0.501	0.118	0	1	ENSMMUG00000053320
ZYX	0	0.78196	0.468	0.125	0	1	ZYX
ENSMMUG00000023620	0	0.780634	0.364	0.071	0	1	ENSMMUG00000023620
PLAAT3	0	0.780388	0.685	0.241	0	1	PLAAT3
USP11	0	0.778934	0.481	0.13	0	1	USP11
SRSF7	0	0.778816	0.852	0.491	0	1	SRSF7
ATP2B4	0	0.775559	0.403	0.098	0	1	ATP2B4
A4GALT	0	0.774471	0.375	0.063	0	1	A4GALT
HUWE1	0	0.774105	0.35	0.069	0	1	HUWE1
ETNK2	0	0.760729	0.358	0.063	0	1	ETNK2
SERINC5	0	0.760001	0.347	0.064	0	1	SERINC5
FDXR	0	0.759021	0.551	0.173	0	1	FDXR
ISYNA1	0	0.751921	0.675	0.242	0	1	ISYNA1
BCAM	0	0.749552	0.603	0.202	0	1	BCAM
TMEM123	0	0.748542	0.566	0.197	0	1	TMEM123
MED25	0	0.747417	0.493	0.14	0	1	MED25
SORL1	0	0.7403	0.279	0.03	0	1	SORL1
MOV10	0	0.730155	0.326	0.055	0	1	MOV10
OMA1	0	0.729181	0.344	0.073	0	1	OMA1
RUFY3	0	0.729098	0.432	0.12	0	1	RUFY3
KTN1	0	0.719218	0.598	0.226	0	1	KTN1
UBA1	0	0.717494	0.392	0.1	0	1	UBA1
ZMYM3	0	0.709218	0.295	0.052	0	1	ZMYM3
APPL2	0	0.708799	0.337	0.073	0	1	APPL2
SRSF11	0	0.708462	0.752	0.374	0	1	SRSF11
LGR4	0	0.705536	0.275	0.035	0	1	LGR4
LAPTM4B	0	0.703929	0.689	0.271	0	1	LAPTM4B
SEC14L1	0	0.700341	0.322	0.063	0	1	SEC14L1
PYCARD	0	0.697647	0.423	0.103	0	1	PYCARD
TCEA3	0	0.694837	0.62	0.241	0	1	TCEA3
GAMT	0	0.693946	0.499	0.159	0	1	GAMT
FBLN2	0	0.693413	0.294	0.054	0	1	FBLN2
AMOTL2	0	0.693216	0.302	0.057	0	1	AMOTL2
IKBKG	0	0.692454	0.373	0.091	0	1	IKBKG
SMARCA5	0	0.689096	0.479	0.158	0	1	SMARCA5
PLA2G1B	0	0.688233	0.756	0.321	0	1	PLA2G1B
MBOAT7	0	0.687909	0.435	0.117	0	1	MBOAT7
TJP1	0	0.687904	0.327	0.063	0	1	TJP1
OBSL1	0	0.682978	0.36	0.089	0	1	OBSL1
ATXN2	0	0.680591	0.327	0.073	0	1	ATXN2
MT3	0	0.67997	0.334	0.068	0	1	MT3
BEX1	0	0.675399	0.819	0.416	0	1	BEX1
WNK1	0	0.674472	0.323	0.07	0	1	WNK1
PTBP3	0	0.672588	0.314	0.06	0	1	PTBP3
CHPF	0	0.671606	0.387	0.095	0	1	CHPF
WFDC2	0	0.670993	0.41	0.096	0	1	WFDC2
SHTN1	0	0.665218	0.289	0.054	0	1	SHTN1
STK11IP	0	0.662499	0.273	0.042	0	1	STK11IP
CHD6	0	0.661981	0.38	0.103	0	1	CHD6
MMD	0	0.659995	0.333	0.069	0	1	MMD
ITGB5	0	0.659307	0.258	0.029	0	1	ITGB5
ARGLU1	0	0.658066	0.635	0.284	0	1	ARGLU1
FBXO21	0	0.657231	0.403	0.118	0	1	FBXO21
SUN1	0	0.654317	0.365	0.091	0	1	SUN1
ENSMMUG00000063316	0	0.653117	0.514	0.204	0	1	ENSMMUG00000063316
NUDT11	0	0.65189	0.409	0.105	0	1	NUDT11
SLC39A4	0	0.650486	0.467	0.144	0	1	SLC39A4
IL6ST	0	0.649294	0.504	0.171	0	1	IL6ST
CTNND1	0	0.648424	0.305	0.065	0	1	CTNND1
TSTA3	0	0.648313	0.486	0.161	0	1	TSTA3
HPRT1	0	0.645763	0.623	0.234	0	1	HPRT1
PABPN1	0	0.645633	0.399	0.123	0	1	PABPN1
DCXR	0	0.644554	0.564	0.228	0	1	DCXR
CYB5A	0	0.643916	0.532	0.187	0	1	CYB5A
BAIAP2	0	0.643727	0.292	0.056	0	1	BAIAP2
PHIP	0	0.643092	0.465	0.17	0	1	PHIP
TNNT1	0	0.639135	0.621	0.258	0	1	TNNT1
CMTR1	0	0.638934	0.403	0.119	0	1	CMTR1
TAX1BP1	0	0.635194	0.439	0.133	0	1	TAX1BP1
PSAP	0	0.63402	0.862	0.548	0	1	PSAP
PDK3	0	0.633434	0.357	0.091	0	1	PDK3
AKAP8L	0	0.62953	0.426	0.139	0	1	AKAP8L
NKTR	0	0.629491	0.546	0.226	0	1	NKTR
RBBP7	0	0.628796	0.67	0.329	0	1	RBBP7
SREK1	0	0.628685	0.411	0.138	0	1	SREK1
ZFAND6	0	0.62853	0.74	0.334	0	1	ZFAND6
EIF4EBP1	0	0.628399	0.591	0.231	0	1	EIF4EBP1
SMIM1	0	0.626862	0.306	0.067	0	1	SMIM1
ATP1A1	0	0.626099	0.392	0.117	0	1	ATP1A1
TNPO3	0	0.624071	0.289	0.06	0	1	TNPO3
NECTIN2	0	0.623522	0.386	0.109	0	1	NECTIN2
RGS3	0	0.621611	0.291	0.06	0	1	RGS3
TSTD1	0	0.621552	0.273	0.045	0	1	TSTD1
IVNS1ABP	0	0.621415	0.29	0.064	0	1	IVNS1ABP
CTXN1	0	0.617027	0.296	0.061	0	1	CTXN1
DPP7	0	0.609946	0.502	0.197	0	1	DPP7
MCRIP2	0	0.60877	0.37	0.108	0	1	MCRIP2
MAT2A	0	0.607586	0.361	0.109	0	1	MAT2A
TM7SF2	0	0.605009	0.319	0.076	0	1	TM7SF2
GSTM3	0	0.604121	0.843	0.551	0	1	GSTM3
HELZ	0	0.60239	0.28	0.058	0	1	HELZ
MGST3	0	0.602116	0.804	0.485	0	1	MGST3
SLC25A36	0	0.601441	0.327	0.087	0	1	SLC25A36
GRN	0	0.601284	0.41	0.128	0	1	GRN
ENO1	0	0.600167	0.806	0.428	0	1	ENO1
EXOC3L1	0	0.595996	0.293	0.069	0	1	EXOC3L1
ENSMMUG00000061458	0	0.595081	0.272	0.063	0	1	ENSMMUG00000061458
WRN	0	0.593368	0.277	0.061	0	1	WRN
ENSMMUG00000031911	0	0.59325	0.327	0.076	0	1	ENSMMUG00000031911
GUSB	0	0.591992	0.32	0.088	0	1	GUSB
GTF2F2	0	0.591686	0.353	0.099	0	1	GTF2F2
EZR	0	0.590775	0.311	0.073	0	1	EZR
DDX3Y	0	0.590292	0.332	0.094	0	1	DDX3Y
RAC3	0	0.588807	0.378	0.102	0	1	RAC3
APPBP2	0	0.588166	0.313	0.074	0	1	APPBP2
EP300	0	0.587119	0.272	0.061	0	1	EP300
GMPR	0	0.573515	0.488	0.178	0	1	GMPR
CAST	0	0.572359	0.299	0.068	0	1	CAST
ALDH1A1	0	0.569947	0.595	0.249	0	1	ALDH1A1
SPOCK2	0	0.568534	0.313	0.073	0	1	SPOCK2
IFI6	0	0.567014	0.766	0.38	0	1	IFI6
SPARC	0	0.565238	0.938	0.739	0	1	SPARC
COPE	0	0.555053	0.711	0.356	0	1	COPE
ENSMMUG00000060287	0	0.552674	0.738	0.383	0	1	ENSMMUG00000060287
TMPRSS9	0	0.552643	0.305	0.069	0	1	TMPRSS9
ENSMMUG00000062792	0	0.551262	0.356	0.092	0	1	ENSMMUG00000062792
JAM2	0	0.548258	0.38	0.115	0	1	JAM2
PIK3IP1	0	0.541243	0.292	0.07	0	1	PIK3IP1
LGALS3BP	0	0.540868	0.422	0.142	0	1	LGALS3BP
TTYH1	0	0.538634	0.31	0.074	0	1	TTYH1
HPCAL1	0	0.532761	0.479	0.176	0	1	HPCAL1
CLCN3	0	0.52193	0.274	0.068	0	1	CLCN3
GSTA3	0	0.519045	0.564	0.22	0	1	GSTA3
UBB	0	0.502192	0.975	0.868	0	1	UBB
AMHR2	0	0.488342	0.261	0.059	0	1	AMHR2
CELF1	2.83025e-305	0.592078	0.424	0.148	4.6702e-301	1	CELF1
BRD4	4.51726e-303	0.570141	0.367	0.116	7.45393e-299	1	BRD4
FABP3	9.50492e-302	0.546615	0.436	0.154	1.56841e-297	1	FABP3
HNRNPA2B1	3.53329e-301	0.542322	0.851	0.55	5.83028e-297	1	HNRNPA2B1
HSPA4	6.70434e-301	0.500868	0.264	0.065	1.10628e-296	1	HSPA4
NAALAD2	3.21833e-300	0.549181	0.284	0.074	5.31057e-296	1	NAALAD2
KMT2C	7.00665e-300	0.537305	0.297	0.08	1.15617e-295	1	KMT2C
ENSMMUG00000001522	1.65665e-299	0.48801	0.28	0.072	2.73364e-295	1	ENSMMUG00000001522
SFPQ	7.62683e-297	0.610709	0.44	0.162	1.2585e-292	1	SFPQ
BOD1L1	8.71549e-294	0.555982	0.315	0.09	1.43814e-289	1	BOD1L1
GOLGB1	8.62687e-292	0.597576	0.331	0.1	1.42352e-287	1	GOLGB1
DUSP1	2.11305e-290	0.581712	0.604	0.28	3.48674e-286	1	DUSP1
MCL1	6.47982e-289	0.647483	0.53	0.23	1.06923e-284	1	MCL1
DAG1	1.34498e-287	0.507821	0.286	0.077	2.21935e-283	1	DAG1
ENSMMUG00000053116	2.05285e-286	0.525139	0.337	0.103	3.38741e-282	1	ENSMMUG00000053116
TMEM259	1.57089e-285	0.551825	0.436	0.16	2.59213e-281	1	TMEM259
WSB1	8.80622e-285	0.591461	0.719	0.376	1.45311e-280	1	WSB1
TESC	2.58028e-282	0.479527	0.271	0.07	4.25772e-278	1	TESC
FAM178A	2.35468e-280	0.504782	0.292	0.081	3.88545e-276	1	FAM178A
CRTC3	8.67062e-280	0.474835	0.264	0.068	1.43074e-275	1	CRTC3
SRPK2	3.07292e-277	0.522724	0.378	0.128	5.07062e-273	1	SRPK2
SRSF6	2.55064e-276	0.560885	0.476	0.19	4.20881e-272	1	SRSF6
SH3BP5	2.52758e-275	0.506248	0.344	0.109	4.17076e-271	1	SH3BP5
IDH1	1.04458e-274	0.57202	0.328	0.102	1.72366e-270	1	IDH1
AXL	2.79118e-271	0.502512	0.323	0.098	4.60573e-267	1	AXL
CD200	3.93852e-270	0.514022	0.313	0.094	6.49895e-266	1	CD200
TSPO	8.1908e-270	0.517883	0.609	0.286	1.35156e-265	1	TSPO
ENSMMUG00000022140	5.14771e-268	0.468992	0.325	0.1	8.49424e-264	1	ENSMMUG00000022140
REST	7.9162e-266	0.521108	0.294	0.086	1.30625e-261	1	REST
MARCKSL1	2.22801e-265	0.497322	0.666	0.338	3.67645e-261	1	MARCKSL1
TRIM25	3.0074e-265	0.525837	0.306	0.093	4.96252e-261	1	TRIM25
GTF2I	3.09522e-264	0.545459	0.397	0.144	5.10742e-260	1	GTF2I
FNIP1	1.26129e-263	0.491172	0.271	0.075	2.08125e-259	1	FNIP1
USP47	6.26407e-261	0.511312	0.282	0.081	1.03363e-256	1	USP47
NUMA1	4.477e-255	0.508035	0.333	0.109	7.3875e-251	1	NUMA1
PYGB	5.47412e-253	0.473426	0.262	0.073	9.03284e-249	1	PYGB
ADAM10	1.98885e-252	0.485633	0.293	0.089	3.2818e-248	1	ADAM10
PIGT	3.8202e-252	0.451172	0.308	0.096	6.30371e-248	1	PIGT
SON	1.40879e-249	0.49441	0.823	0.537	2.32465e-245	1	SON
VASN	2.47967e-249	0.455147	0.272	0.078	4.0917e-245	1	VASN
CHD4	1.09298e-247	0.497424	0.393	0.145	1.80353e-243	1	CHD4
SRSF10	2.29268e-247	0.489242	0.254	0.07	3.78314e-243	1	SRSF10
EPN1	6.39692e-247	0.495522	0.438	0.173	1.05556e-242	1	EPN1
PDLIM4	3.01412e-246	0.485002	0.419	0.161	4.97359e-242	1	PDLIM4
U2AF2	4.46774e-245	0.524128	0.399	0.152	7.37222e-241	1	U2AF2
LMBR1L	5.75414e-244	0.465143	0.267	0.077	9.49491e-240	1	LMBR1L
BPTF	2.50287e-241	0.506605	0.352	0.124	4.12998e-237	1	BPTF
BUD23	1.03174e-239	0.388664	0.519	0.226	1.70248e-235	1	BUD23
SVIP	3.81031e-239	0.459399	0.306	0.099	6.28739e-235	1	SVIP
CALR	8.60364e-239	0.462105	0.842	0.572	1.41969e-234	1	CALR
DHX36	1.61726e-238	0.530422	0.377	0.14	2.66864e-234	1	DHX36
LUC7L3	8.58054e-238	0.505557	0.711	0.385	1.41587e-233	1	LUC7L3
FNDC3B	9.57396e-236	0.48973	0.281	0.086	1.5798e-231	1	FNDC3B
RDX	9.60416e-236	0.514582	0.542	0.252	1.58478e-231	1	RDX
SF1	9.55844e-235	0.521963	0.404	0.159	1.57724e-230	1	SF1
C4H6orf62	4.50727e-231	0.502639	0.352	0.128	7.43745e-227	1	C4H6orf62
ARPC2	8.93215e-230	0.467576	0.583	0.286	1.47389e-225	1	ARPC2
FAM234A	1.48652e-228	0.448481	0.352	0.127	2.4529e-224	1	FAM234A
MVP	9.17574e-224	0.449861	0.284	0.09	1.51409e-219	1	MVP
PRDX1	2.85772e-222	0.446909	0.688	0.384	4.71552e-218	1	PRDX1
FAM127C	4.18375e-222	0.509255	0.46	0.199	6.90361e-218	1	FAM127C
GRAMD1A	2.04494e-221	0.478439	0.279	0.089	3.37436e-217	1	GRAMD1A
SERPINF1	6.29636e-220	0.462034	0.669	0.363	1.03896e-215	1	SERPINF1
CTSD	3.93019e-219	0.445356	0.582	0.289	6.48521e-215	1	CTSD
MLF1	6.19518e-216	0.377093	0.282	0.09	1.02227e-211	1	MLF1
SLC44A2	1.72072e-215	0.443849	0.267	0.083	2.83935e-211	1	SLC44A2
SRSF2	3.21355e-215	0.497351	0.606	0.313	5.30267e-211	1	SRSF2
TIA1	2.78646e-214	0.471179	0.373	0.144	4.59794e-210	1	TIA1
SERPINB6	8.68259e-214	0.460035	0.383	0.151	1.43271e-209	1	SERPINB6
TGIF1	4.81447e-213	0.42675	0.324	0.114	7.94436e-209	1	TGIF1
AMD1	5.31418e-213	0.444068	0.338	0.123	8.76893e-209	1	AMD1
PWWP3B	5.13591e-211	0.430201	0.298	0.1	8.47476e-207	1	PWWP3B
EIF3A	1.47191e-210	0.443975	0.329	0.119	2.4288e-206	1	EIF3A
ADH5	1.9271e-210	0.437772	0.626	0.331	3.17992e-206	1	ADH5
CSNK1A1	8.38439e-210	0.470838	0.417	0.175	1.38351e-205	1	CSNK1A1
NCOA7	8.66243e-209	0.451782	0.277	0.091	1.42939e-204	1	NCOA7
CYP27A1	2.83896e-208	0.423775	0.276	0.09	4.68457e-204	1	CYP27A1
IFI27	3.71508e-207	0.36605	0.88	0.645	6.13026e-203	1	IFI27
UNC119	2.502e-206	0.4107	0.343	0.128	4.12855e-202	1	UNC119
ENSMMUG00000054976	8.95881e-206	0.446107	0.462	0.203	1.47829e-201	1	ENSMMUG00000054976
MYH9	8.68385e-205	0.443532	0.356	0.137	1.43292e-200	1	MYH9
GOLGA4	2.78461e-203	0.479539	0.307	0.11	4.59489e-199	1	GOLGA4
OGA	6.86868e-203	0.448371	0.298	0.104	1.1334e-198	1	OGA
PRRC2A	6.49418e-202	0.446251	0.272	0.09	1.0716e-197	1	PRRC2A
SARS	1.6974e-201	0.472743	0.518	0.25	2.80088e-197	1	SARS
VEZF1	3.92022e-201	0.428303	0.304	0.107	6.46876e-197	1	VEZF1
TSEN34	2.6734e-199	0.430952	0.444	0.195	4.41137e-195	1	TSEN34
MCFD2	1.29215e-198	0.446544	0.366	0.146	2.13217e-194	1	MCFD2
FLYWCH2	9.26671e-198	0.428922	0.366	0.146	1.5291e-193	1	FLYWCH2
PUM2	2.32163e-195	0.426031	0.291	0.102	3.83091e-191	1	PUM2
SNRPN	2.42596e-195	0.414348	0.525	0.253	4.00307e-191	1	SNRPN
MGST2	2.50405e-195	0.409601	0.34	0.131	4.13193e-191	1	MGST2
PHGDH	4.83274e-195	0.401866	0.318	0.116	7.9745e-191	1	PHGDH
NXF1	9.22817e-193	0.428609	0.271	0.092	1.52274e-188	1	NXF1
ING2	3.54969e-191	0.444042	0.36	0.146	5.85735e-187	1	ING2
RWDD3	9.23944e-191	0.412667	0.305	0.11	1.5246e-186	1	RWDD3
EIF4G1	1.09297e-189	0.406388	0.261	0.087	1.80351e-185	1	EIF4G1
TECR	1.55821e-189	0.396175	0.469	0.213	2.5712e-185	1	TECR
RBM26	2.40624e-189	0.446959	0.366	0.148	3.97053e-185	1	RBM26
EIF4G2	3.76336e-189	0.441415	0.542	0.273	6.20992e-185	1	EIF4G2
DYNLL1	6.74249e-189	0.40031	0.739	0.463	1.11258e-184	1	DYNLL1
SUGP2	1.54536e-186	0.412424	0.313	0.117	2.55e-182	1	SUGP2
RSRP1	2.58474e-186	0.444755	0.364	0.149	4.26509e-182	1	RSRP1
ABI2	3.95038e-186	0.420714	0.352	0.14	6.51852e-182	1	ABI2
ACTN4	1.62168e-185	0.436657	0.372	0.154	2.67594e-181	1	ACTN4
TCEAL9	5.57268e-185	0.376445	0.793	0.523	9.19549e-181	1	TCEAL9
PRPF8	1.07836e-183	0.405918	0.355	0.142	1.7794e-179	1	PRPF8
DDB1	4.94539e-183	0.416252	0.316	0.121	8.16039e-179	1	DDB1
PKN2	9.61604e-183	0.437696	0.366	0.151	1.58674e-178	1	PKN2
ATP5F1E	1.21123e-182	0.345009	0.859	0.633	1.99865e-178	1	ATP5F1E
PSEN2	1.18744e-181	0.393947	0.255	0.086	1.95939e-177	1	PSEN2
THUMPD1	3.97438e-180	0.398025	0.341	0.136	6.55812e-176	1	THUMPD1
ENSMMUG00000030408	5.61468e-180	0.410684	0.654	0.376	9.26478e-176	1	ENSMMUG00000030408
MTA2	1.37794e-178	0.376264	0.269	0.094	2.27373e-174	1	MTA2
SCD5	4.58324e-178	0.375406	0.352	0.142	7.5628e-174	1	SCD5
LAMB2	1.21058e-177	0.401805	0.309	0.118	1.99758e-173	1	LAMB2
ENSMMUG00000045123	1.21813e-176	0.391013	0.798	0.55	2.01004e-172	1	ENSMMUG00000045123
LRCH3	5.16993e-176	0.429122	0.289	0.107	8.5309e-172	1	LRCH3
TPM3	5.36767e-176	0.386647	0.292	0.109	8.8572e-172	1	TPM3
CAMTA1	9.33019e-176	0.396597	0.336	0.135	1.53957e-171	1	CAMTA1
LENG8	3.0554e-175	0.406694	0.318	0.123	5.04171e-171	1	LENG8
YWHAE	5.09359e-175	0.408683	0.336	0.136	8.40494e-171	1	YWHAE
NCOA3	1.94354e-174	0.396932	0.258	0.089	3.20703e-170	1	NCOA3
FKBP2	1.78697e-171	0.381315	0.64	0.359	2.94869e-167	1	FKBP2
PET100	1.98826e-171	0.404689	0.401	0.179	3.28083e-167	1	PET100
PDIA6	1.64312e-170	0.392288	0.527	0.269	2.71131e-166	1	PDIA6
ENSMMUG00000049154	3.17114e-169	0.39356	0.634	0.356	5.2327e-165	1	ENSMMUG00000049154
CLDN11	9.00432e-169	0.374743	0.351	0.145	1.4858e-164	1	CLDN11
GCC2	1.73516e-168	0.381299	0.252	0.088	2.86319e-164	1	GCC2
CST3	1.81779e-168	0.256308	0.891	0.668	2.99953e-164	1	CST3
TTC14	9.56766e-168	0.394369	0.251	0.087	1.57876e-163	1	TTC14
MYL6B	3.80937e-167	0.423447	0.411	0.188	6.28583e-163	1	MYL6B
TRA2B	4.88787e-166	0.405021	0.542	0.282	8.06548e-162	1	TRA2B
EGR1	5.30632e-166	0.431964	0.27	0.099	8.75596e-162	1	EGR1
TLN1	1.62869e-165	0.383845	0.294	0.113	2.6875e-161	1	TLN1
UROD	4.23472e-165	0.369501	0.325	0.132	6.98771e-161	1	UROD
PAPOLA	9.87524e-165	0.42218	0.363	0.158	1.62951e-160	1	PAPOLA
SOX4	2.22247e-164	0.398834	0.597	0.329	3.6673e-160	1	SOX4
ZBTB20	1.0348e-162	0.406784	0.273	0.102	1.70752e-158	1	ZBTB20
GNG5	1.27126e-162	0.447699	0.564	0.31	2.09771e-158	1	GNG5
PPP1R15A	2.23727e-162	0.397382	0.409	0.188	3.69172e-158	1	PPP1R15A
LMNA	6.90138e-162	0.417795	0.571	0.313	1.1388e-157	1	LMNA
POGZ	1.12882e-161	0.381288	0.256	0.092	1.86267e-157	1	POGZ
ILF3	2.3267e-161	0.398346	0.363	0.158	3.83928e-157	1	ILF3
SMS	1.41714e-160	0.364049	0.489	0.243	2.33843e-156	1	SMS
PTGDS	5.68839e-160	0.382871	0.319	0.133	9.38642e-156	1	PTGDS
TCAF1	1.90187e-159	0.368573	0.267	0.099	3.13828e-155	1	TCAF1
ARID4B	3.82167e-158	0.419036	0.366	0.162	6.30614e-154	1	ARID4B
CHID1	6.09297e-158	0.339389	0.333	0.138	1.0054e-153	1	CHID1
BTG3	1.23786e-157	0.360501	0.452	0.217	2.04259e-153	1	BTG3
TRIM72	3.13011e-157	0.39021	0.663	0.401	5.165e-153	1	TRIM72
C3H7orf50	1.46443e-156	0.364198	0.597	0.332	2.41645e-152	1	C3H7orf50
DYNC1LI2	7.10774e-156	0.379603	0.275	0.105	1.17285e-151	1	DYNC1LI2
KCTD12	1.28068e-155	0.351943	0.278	0.106	2.11324e-151	1	KCTD12
YWHAB	2.20881e-155	0.408708	0.529	0.283	3.64476e-151	1	YWHAB
RNF216	1.06452e-154	0.377972	0.251	0.092	1.75657e-150	1	RNF216
HMGN3	1.07262e-154	0.369808	0.776	0.531	1.76993e-150	1	HMGN3
TMED10	3.99313e-154	0.385018	0.425	0.205	6.58906e-150	1	TMED10
SNRNP200	4.33818e-154	0.365261	0.301	0.121	7.15844e-150	1	SNRNP200
ENSMMUG00000007970	1.37944e-153	0.343772	0.292	0.115	2.27621e-149	1	ENSMMUG00000007970
CALM3	2.22182e-153	0.372426	0.515	0.269	3.66623e-149	1	CALM3
MATR3	3.00799e-153	0.402595	0.464	0.234	4.96348e-149	1	MATR3
TUBA1A	3.80304e-153	0.329282	0.882	0.723	6.27539e-149	1	TUBA1A
HNRNPH1	7.78504e-152	0.400877	0.574	0.318	1.28461e-147	1	HNRNPH1
SETD5	1.16815e-151	0.37768	0.282	0.11	1.92756e-147	1	SETD5
NDUFA2	1.50986e-151	0.39548	0.543	0.294	2.49142e-147	1	NDUFA2
RERE	3.61942e-151	0.355736	0.256	0.096	5.97241e-147	1	RERE
NONO	8.93815e-151	0.384505	0.425	0.205	1.47488e-146	1	NONO
UPF2	4.95487e-150	0.384334	0.361	0.16	8.17603e-146	1	UPF2
ODC1	1.51117e-149	0.323508	0.265	0.1	2.49358e-145	1	ODC1
ENSMMUG00000055690	1.67396e-149	0.417516	0.416	0.2	2.7622e-145	1	ENSMMUG00000055690
DPH1	1.12108e-148	0.377368	0.292	0.118	1.8499e-144	1	DPH1
RBM17	2.5088e-148	0.379181	0.409	0.193	4.13977e-144	1	RBM17
BRD2	2.65661e-148	0.375914	0.401	0.189	4.38367e-144	1	BRD2
RHOBTB3	5.0551e-148	0.358084	0.356	0.157	8.34143e-144	1	RHOBTB3
BRD3	9.1091e-148	0.339846	0.287	0.115	1.50309e-143	1	BRD3
DEAF1	5.04019e-147	0.327772	0.275	0.108	8.31682e-143	1	DEAF1
ITFG1	2.67325e-146	0.358084	0.364	0.165	4.41113e-142	1	ITFG1
GANAB	5.1229e-146	0.362533	0.288	0.117	8.4533e-142	1	GANAB
ACAA2	7.00871e-146	0.346877	0.351	0.156	1.15651e-141	1	ACAA2
ANXA6	8.56048e-146	0.356559	0.414	0.197	1.41256e-141	1	ANXA6
COX17	1.41555e-145	0.331867	0.37	0.168	2.33579e-141	1	COX17
APMAP	1.72479e-145	0.318469	0.306	0.127	2.84608e-141	1	APMAP
ACIN1	2.16439e-145	0.345836	0.283	0.113	3.57146e-141	1	ACIN1
EIF5B	4.82443e-145	0.369915	0.444	0.22	7.96079e-141	1	EIF5B
SCAF11	4.88002e-145	0.388192	0.413	0.199	8.05252e-141	1	SCAF11
DDOST	1.95153e-144	0.356411	0.714	0.469	3.22021e-140	1	DDOST
NAE1	6.45941e-144	0.338001	0.355	0.158	1.06587e-139	1	NAE1
TAF7	1.85081e-143	0.35271	0.463	0.234	3.05402e-139	1	TAF7
FLNA	2.02378e-143	0.320139	0.301	0.125	3.33944e-139	1	FLNA
HMGN4	1.27768e-142	0.3262	0.4	0.188	2.1083e-138	1	HMGN4
DMAC1	9.16462e-142	0.348532	0.485	0.25	1.51225e-137	1	DMAC1
COX7A2	1.00801e-141	0.375226	0.651	0.405	1.66332e-137	1	COX7A2
ATRX	1.71515e-141	0.377543	0.372	0.172	2.83017e-137	1	ATRX
FNTB	2.29655e-141	0.345337	0.427	0.21	3.78953e-137	1	FNTB
HTATSF1	1.11974e-140	0.342958	0.324	0.141	1.84768e-136	1	HTATSF1
SPINT2	1.48812e-140	0.345905	0.563	0.314	2.45554e-136	1	SPINT2
MAPRE1	6.66883e-140	0.335789	0.275	0.111	1.10042e-135	1	MAPRE1
GNAI2.1	8.46485e-140	0.334946	0.308	0.13	1.39678e-135	1	GNAI2.1
PRDX6	2.66313e-139	0.324844	0.736	0.501	4.39443e-135	1	PRDX6
NOTCH2	8.07682e-138	0.329611	0.319	0.137	1.33276e-133	1	NOTCH2
CDK2AP1	8.2551e-138	0.344014	0.454	0.232	1.36217e-133	1	CDK2AP1
SF3B1	1.6464e-137	0.355014	0.448	0.225	2.71672e-133	1	SF3B1
JAK1	4.04642e-136	0.332317	0.298	0.126	6.677e-132	1	JAK1
MBD3	1.2427e-135	0.354876	0.696	0.45	2.05058e-131	1	MBD3
RPN2	2.03071e-135	0.343712	0.393	0.19	3.35087e-131	1	RPN2
PUF60	6.39492e-135	0.348392	0.497	0.266	1.05523e-130	1	PUF60
BCLAF1	1.53336e-134	0.348491	0.439	0.221	2.5302e-130	1	BCLAF1
DDX42	4.74913e-134	0.338779	0.268	0.109	7.83653e-130	1	DDX42
SLC39A3	2.01692e-133	0.309959	0.278	0.114	3.32812e-129	1	SLC39A3
ACAP2	1.27211e-132	0.363606	0.251	0.099	2.09911e-128	1	ACAP2
ZBED1	1.07443e-131	0.345203	0.369	0.174	1.77292e-127	1	ZBED1
ENSMMUG00000006803	8.4012e-131	0.354527	0.296	0.128	1.38628e-126	1	ENSMMUG00000006803
COX7B	2.09589e-130	0.325897	0.731	0.488	3.45843e-126	1	COX7B
ST3GAL4	2.11642e-130	0.3203	0.382	0.182	3.4923e-126	1	ST3GAL4
CLK1	8.63088e-130	0.356957	0.356	0.166	1.42418e-125	1	CLK1
SERPINB1	1.08855e-129	0.295024	0.252	0.1	1.79622e-125	1	SERPINB1
TIMM8B	1.46429e-129	0.328974	0.506	0.273	2.41623e-125	1	TIMM8B
ISOC2	3.74461e-129	0.304713	0.308	0.135	6.17898e-125	1	ISOC2
HSPA9	3.32701e-128	0.31217	0.298	0.13	5.4899e-124	1	HSPA9
GYG1	3.52802e-128	0.317044	0.419	0.211	5.82158e-124	1	GYG1
ANKRD11	6.41125e-128	0.370476	0.384	0.189	1.05792e-123	1	ANKRD11
NDUFS8	1.50463e-127	0.3087	0.46	0.241	2.48278e-123	1	NDUFS8
YWHAZ	2.42976e-127	0.305321	0.304	0.133	4.00934e-123	1	YWHAZ
URGCP	3.76727e-127	0.327275	0.439	0.226	6.21638e-123	1	URGCP
ACAD10	4.63137e-127	0.308289	0.55	0.309	7.64222e-123	1	ACAD10
MYL6	6.0317e-127	0.258505	0.891	0.729	9.9529e-123	1	MYL6
GPX4	8.91565e-127	0.319609	0.303	0.134	1.47117e-122	1	GPX4
SDF4	9.12611e-127	0.342586	0.354	0.168	1.5059e-122	1	SDF4
GLRX5	1.06385e-125	0.302844	0.303	0.134	1.75546e-121	1	GLRX5
CDC5L	1.25615e-124	0.324554	0.299	0.132	2.07278e-120	1	CDC5L
SDHA	1.74461e-124	0.316072	0.349	0.163	2.87877e-120	1	SDHA
UQCRQ	2.05828e-124	0.320761	0.395	0.197	3.39637e-120	1	UQCRQ
KIFBP	3.15719e-124	0.319052	0.281	0.121	5.20967e-120	1	KIFBP
DDX46	3.66544e-124	0.346292	0.327	0.151	6.04835e-120	1	DDX46
KLHL23	4.81346e-124	0.345663	0.491	0.269	7.94269e-120	1	KLHL23
ZNF292	5.66318e-124	0.334907	0.297	0.131	9.34481e-120	1	ZNF292
BEX2	2.86294e-123	0.291334	0.398	0.196	4.72413e-119	1	BEX2
ROMO1	7.4452e-123	0.318868	0.731	0.496	1.22853e-118	1	ROMO1
STMN1	1.1278e-121	0.272408	0.644	0.396	1.86098e-117	1	STMN1
TRA2A	1.87755e-121	0.319255	0.295	0.131	3.09814e-117	1	TRA2A
UBE3A	5.69308e-121	0.304877	0.262	0.11	9.39415e-117	1	UBE3A
OAZ1	7.57494e-121	0.30114	0.481	0.262	1.24994e-116	1	OAZ1
RAD23B	8.85435e-121	0.291513	0.305	0.137	1.46106e-116	1	RAD23B
WAC	9.84312e-121	0.323013	0.284	0.124	1.62421e-116	1	WAC
HEXIM1	2.87308e-120	0.326635	0.258	0.107	4.74087e-116	1	HEXIM1
DKK3	6.02726e-120	0.302222	0.362	0.173	9.94559e-116	1	DKK3
PRPF38B	1.76469e-119	0.335774	0.354	0.171	2.91192e-115	1	PRPF38B
PTPA	4.34781e-119	0.308483	0.255	0.107	7.17433e-115	1	PTPA
COMMD3	7.783e-119	0.299555	0.284	0.124	1.28427e-114	1	COMMD3
PHACTR2	9.82741e-119	0.309836	0.314	0.144	1.62162e-114	1	PHACTR2
HSPA5	7.50185e-118	0.314383	0.502	0.278	1.23788e-113	1	HSPA5
DCAF8	1.46761e-117	0.316998	0.258	0.109	2.4217e-113	1	DCAF8
TNRC6B	2.67982e-117	0.292614	0.294	0.131	4.42196e-113	1	TNRC6B
EWSR1	1.06587e-116	0.336287	0.381	0.191	1.75879e-112	1	EWSR1
SDHAF4	2.86848e-116	0.294732	0.334	0.158	4.73327e-112	1	SDHAF4
ARID5B	1.28378e-115	0.287539	0.368	0.18	2.11836e-111	1	ARID5B
TMEM97	3.69047e-115	0.275712	0.253	0.106	6.08964e-111	1	TMEM97
PTOV1	4.71263e-115	0.301989	0.596	0.355	7.77631e-111	1	PTOV1
FSCN1	6.3314e-115	0.30002	0.429	0.223	1.04474e-110	1	FSCN1
PUM1	6.40276e-115	0.323205	0.303	0.139	1.05652e-110	1	PUM1
CCNL1	7.67974e-115	0.313659	0.383	0.193	1.26723e-110	1	CCNL1
ZNF75A	9.53748e-113	0.29447	0.279	0.123	1.57378e-108	1	ZNF75A
HNRNPU	1.46336e-112	0.303957	0.487	0.271	2.4147e-108	1	HNRNPU
TMEM160	1.71023e-112	0.306661	0.348	0.171	2.82205e-108	1	TMEM160
RBM39	2.62306e-111	0.31917	0.427	0.226	4.32832e-107	1	RBM39
GTF2H5	2.66406e-111	0.273319	0.394	0.203	4.39597e-107	1	GTF2H5
TIMM10B	7.84499e-111	0.293142	0.374	0.189	1.2945e-106	1	TIMM10B
APP	9.54383e-111	0.309603	0.491	0.274	1.57483e-106	1	APP
COX4I1	5.97554e-110	0.281448	0.826	0.641	9.86024e-106	1	COX4I1
AGA	8.48617e-110	0.275009	0.334	0.161	1.4003e-105	1	AGA
TSPAN6	9.23946e-110	0.298606	0.252	0.108	1.5246e-105	1	TSPAN6
ZFR	3.19025e-109	0.293838	0.311	0.146	5.26423e-105	1	ZFR
ENSMMUG00000047481	8.65107e-109	0.285073	0.552	0.325	1.42751e-104	1	ENSMMUG00000047481
HSPD1	2.15652e-108	0.31833	0.421	0.226	3.55847e-104	1	HSPD1
HSP90B1	1.00483e-107	0.295833	0.614	0.375	1.65807e-103	1	HSP90B1
WASL	2.1902e-107	0.300576	0.387	0.201	3.61405e-103	1	WASL
ENSMMUG00000049722	2.24695e-107	0.28852	0.407	0.214	3.7077e-103	1	ENSMMUG00000049722
CD47	2.66696e-106	0.275376	0.29	0.134	4.40075e-102	1	CD47
HINT2	3.83643e-106	0.268189	0.387	0.2	6.3305e-102	1	HINT2
IST1	5.93509e-106	0.282747	0.304	0.143	9.79349e-102	1	IST1
ETFB	3.80781e-105	0.283297	0.497	0.282	6.28327e-101	1	ETFB
BIRC2	4.72372e-105	0.273598	0.256	0.112	7.79461e-101	1	BIRC2
C10H20orf24	7.89423e-105	0.285551	0.36	0.183	1.30263e-100	1	C10H20orf24
ENSMMUG00000022428	1.02256e-104	0.274352	0.556	0.331	1.68732e-100	1	ENSMMUG00000022428
SUPT16H	1.64424e-104	0.271062	0.279	0.127	2.71316e-100	1	SUPT16H
ENSMMUG00000018740	3.20479e-104	0.299264	0.572	0.348	5.28822e-100	1	ENSMMUG00000018740
PNRC2	1.22207e-103	0.275042	0.376	0.192	2.01654e-99	1	PNRC2
MRPL57	2.81398e-103	0.285563	0.321	0.157	4.64335e-99	1	MRPL57
ATP5F1A	9.64217e-103	0.28106	0.665	0.438	1.59105e-98	1	ATP5F1A
PPM1K	2.06835e-102	0.29722	0.28	0.129	3.41299e-98	1	PPM1K
UBAP2L	2.77244e-102	0.286419	0.267	0.121	4.5748e-98	1	UBAP2L
CNOT4	3.2362e-102	0.276023	0.299	0.142	5.34006e-98	1	CNOT4
SRSF1	4.60596e-102	0.274388	0.438	0.239	7.60029e-98	1	SRSF1
KATNBL1	1.50855e-101	0.284991	0.275	0.126	2.48926e-97	1	KATNBL1
YY1	3.84547e-101	0.272778	0.252	0.112	6.34541e-97	1	YY1
LAMP2	4.13363e-101	0.256549	0.276	0.127	6.8209e-97	1	LAMP2
CTDSP2	7.88108e-101	0.260469	0.311	0.149	1.30046e-96	1	CTDSP2
HEXA	1.62201e-100	0.279025	0.264	0.121	2.67648e-96	1	HEXA
RALBP1	9.57081e-100	0.274711	0.276	0.129	1.57928e-95	1	RALBP1
UBXN4	2.38875e-99	0.295035	0.445	0.248	3.94168e-95	1	UBXN4
NFE2L1	1.52767e-98	0.279714	0.266	0.123	2.5208e-94	1	NFE2L1
ENSMMUG00000044585	6.81402e-98	0.279637	0.712	0.487	1.12438e-93	1	ENSMMUG00000044585
KMT2E	1.10262e-96	0.271223	0.423	0.231	1.81944e-92	1	KMT2E
AKAP9	6.8487e-96	0.275365	0.288	0.138	1.1301e-91	1	AKAP9
SAFB2	2.89108e-95	0.295283	0.264	0.124	4.77057e-91	1	SAFB2
ENSMMUG00000008084	2.95287e-95	0.262035	0.314	0.156	4.87253e-91	1	ENSMMUG00000008084
PRPF40A	3.08183e-95	0.264122	0.29	0.14	5.08532e-91	1	PRPF40A
HYPK	5.64323e-95	0.286475	0.456	0.262	9.31189e-91	1	HYPK
SPSB3	1.10895e-94	0.286365	0.325	0.165	1.82988e-90	1	SPSB3
ENY2	1.28785e-94	0.251967	0.474	0.271	2.12507e-90	1	ENY2
NDUFA6	1.87983e-94	0.276379	0.437	0.245	3.10191e-90	1	NDUFA6
RBM25	3.06573e-92	0.26633	0.335	0.171	5.05876e-88	1	RBM25
HNRNPL	6.29182e-92	0.259598	0.466	0.268	1.03821e-87	1	HNRNPL
C12orf5	2.66133e-90	0.3043	0.348	0.185	4.39145e-86	1	C12orf5
U2SURP	1.21718e-89	0.251361	0.346	0.181	2.00847e-85	1	U2SURP
ZC3H13	1.18007e-86	0.256719	0.267	0.129	1.94724e-82	1	ZC3H13
RSF1	8.99532e-86	0.253039	0.3	0.152	1.48432e-81	1	RSF1
ZNF207	3.7869e-85	0.251766	0.267	0.131	6.24876e-81	1	ZNF207
RBM14	2.58496e-84	0.256727	0.336	0.178	4.26544e-80	1	RBM14
RNF145	3.22158e-84	0.250541	0.306	0.157	5.31593e-80	1	RNF145
PPIG	4.4257e-84	0.264113	0.423	0.241	7.30285e-80	1	PPIG
MFF	5.90394e-84	0.250905	0.396	0.221	9.7421e-80	1	MFF
EPB41L2	1.15976e-83	0.259635	0.29	0.146	1.91372e-79	1	EPB41L2
LMAN2	2.42751e-83	0.256521	0.416	0.236	4.00564e-79	1	LMAN2
PRRC2C	1.21026e-82	0.26447	0.454	0.267	1.99704e-78	1	PRRC2C
FOSB	1.33616e-81	0.259934	0.507	0.316	2.20479e-77	1	FOSB
CHD9	1.66334e-80	0.268825	0.292	0.15	2.74467e-76	1	CHD9
SOCS3	0	1.36357	0.526	0.165	0	2	SOCS3
FOS	0	1.30798	0.987	0.657	0	2	FOS
JUN	0	1.15144	0.998	0.742	0	2	JUN
FOSB1	4.69777e-275	0.79989	0.59	0.309	7.7518e-271	2	FOSB
IGF21	1.72446e-248	0.415271	0.996	0.789	2.84552e-244	2	IGF2
GADD45B	1.88292e-241	1.24787	0.423	0.195	3.10701e-237	2	GADD45B
BTG1	8.63592e-213	0.600296	0.785	0.581	1.42501e-208	2	BTG1
DCN1	3.0044e-207	0.370763	0.924	0.661	4.95757e-203	2	DCN
ENSMMUG000000618241	2.69469e-206	0.36085	0.985	0.966	4.44652e-202	2	ENSMMUG00000061824
C71	1.20918e-194	0.497062	0.737	0.46	1.99526e-190	2	C7
ZFP36	3.29621e-185	0.546531	0.537	0.292	5.43908e-181	2	ZFP36
APOE1	4.45018e-170	0.31547	0.973	0.884	7.34325e-166	2	APOE
TXNIP1	1.24153e-146	0.504848	0.74	0.542	2.04866e-142	2	TXNIP
SERPINE21	1.78096e-145	0.558373	0.627	0.438	2.93877e-141	2	SERPINE2
ENSMMUG00000049151	2.94902e-144	0.374038	0.871	0.79	4.86617e-140	2	ENSMMUG00000049151
DUSP11	1.26937e-142	0.840235	0.491	0.302	2.09458e-138	2	DUSP1
ENSMMUG00000002320	4.77757e-121	0.319824	0.922	0.868	7.88347e-117	2	ENSMMUG00000002320
MMP2	1.331e-117	0.442568	0.612	0.423	2.19629e-113	2	MMP2
C1S1	2.02194e-115	0.441714	0.524	0.326	3.33641e-111	2	C1S
COL6A21	1.23207e-110	0.38909	0.645	0.44	2.03304e-106	2	COL6A2
NR4A1	5.3408e-105	0.884153	0.272	0.134	8.81285e-101	2	NR4A1
MFAP41	3.00854e-97	0.45074	0.516	0.332	4.96439e-93	2	MFAP4
FXYD11	1.00086e-93	0.449833	0.455	0.285	1.65151e-89	2	FXYD1
NDRG21	1.51199e-91	0.45396	0.44	0.277	2.49494e-87	2	NDRG2
SPOCK31	2.04011e-81	0.472209	0.328	0.186	3.36638e-77	2	SPOCK3
HIST1H2AC	1.91795e-79	0.613	0.287	0.16	3.16481e-75	2	HIST1H2AC
PPAP2B1	1.76676e-74	0.385933	0.499	0.352	2.91532e-70	2	PPAP2B
TSC22D31	2.22689e-72	0.427124	0.58	0.457	3.6746e-68	2	TSC22D3
SFRP11	5.63735e-67	0.421596	0.383	0.245	9.30219e-63	2	SFRP1
C1R	6.78326e-67	0.372704	0.406	0.266	1.11931e-62	2	C1R
PMP221	7.07213e-67	0.352027	0.465	0.315	1.16697e-62	2	PMP22
NPM11	4.88493e-66	0.261077	0.856	0.8	8.06062e-62	2	NPM1
EIF4A21	2.40037e-61	0.282223	0.804	0.746	3.96085e-57	2	EIF4A2
RND3	4.94165e-60	0.510592	0.273	0.162	8.15422e-56	2	RND3
SRPX1	6.29095e-60	0.386508	0.321	0.198	1.03807e-55	2	SRPX
HTRA11	7.29106e-60	0.360924	0.434	0.302	1.2031e-55	2	HTRA1
NR2F21	2.40449e-56	0.376055	0.395	0.27	3.96764e-52	2	NR2F2
TGFBR31	5.02771e-53	0.333219	0.41	0.285	8.29623e-49	2	TGFBR3
ZFP36L1	2.03482e-52	0.282762	0.636	0.523	3.35766e-48	2	ZFP36L1
RAMP21	1.04927e-51	0.398433	0.33	0.217	1.73141e-47	2	RAMP2
HSPB1	3.03866e-50	0.481014	0.398	0.289	5.0141e-46	2	HSPB1
PSD3	2.22397e-49	0.402588	0.251	0.151	3.66978e-45	2	PSD3
LTBP41	1.58207e-44	0.275147	0.453	0.333	2.61057e-40	2	LTBP4
SRSF71	3.06044e-43	0.38731	0.617	0.531	5.05004e-39	2	SRSF7
EMP31	3.99835e-43	0.305132	0.529	0.431	6.59768e-39	2	EMP3
SERPING1	1.3014e-37	0.315231	0.357	0.264	2.14745e-33	2	SERPING1
NTRK21	5.88545e-36	0.335784	0.267	0.178	9.71158e-32	2	NTRK2
ENSMMUG000000132571	2.13192e-34	0.299302	0.406	0.315	3.51788e-30	2	ENSMMUG00000013257
NOVA11	3.70933e-34	0.391871	0.315	0.229	6.12077e-30	2	NOVA1
EPHX1	1.86275e-33	0.3205	0.306	0.217	3.07373e-29	2	EPHX1
DHRS21	1.47733e-30	0.299543	0.292	0.206	2.43774e-26	2	DHRS2
ENSMMUG000000647921	1.94631e-30	0.262704	0.465	0.384	3.21161e-26	2	ENSMMUG00000064792
RNASE41	4.42019e-28	0.276269	0.366	0.285	7.29376e-24	2	RNASE4
CTSC1	1.9134e-27	0.279857	0.284	0.204	3.15731e-23	2	CTSC
VGLL41	2.93766e-27	0.306568	0.395	0.327	4.84743e-23	2	VGLL4
ENSMMUG00000032231	8.85601e-27	0.265701	0.344	0.262	1.46133e-22	2	ENSMMUG00000032231
ARL4A	1.34526e-25	0.36609	0.284	0.218	2.21982e-21	2	ARL4A
SERPINH1	2.86407e-20	0.253283	0.375	0.313	4.726e-16	2	SERPINH1
SQSTM11	1.13191e-18	0.259976	0.359	0.304	1.86777e-14	2	SQSTM1
NFIC1	2.23458e-17	0.265267	0.315	0.262	3.68728e-13	2	NFIC
MCL11	5.07644e-17	0.297462	0.316	0.265	8.37663e-13	2	MCL1
BEX11	0	1.20216	0.853	0.431	0	3	BEX1
HPRT11	0	1.12627	0.657	0.248	0	3	HPRT1
ENSMMUG000000164901	0	1.07828	0.768	0.3	0	3	ENSMMUG00000016490
ENSMMUG000000535391	0	1.07333	0.65	0.235	0	3	ENSMMUG00000053539
GSTA31	0	1.07318	0.612	0.231	0	3	GSTA3
CITED11	0	1.06203	0.596	0.24	0	3	CITED1
GATM1	0	1.0446	0.613	0.233	0	3	GATM
PLAAT31	0	1.03991	0.667	0.263	0	3	PLAAT3
PLA2G1B1	0	1.00924	0.759	0.341	0	3	PLA2G1B
INHA1	0	1.0038	0.866	0.351	0	3	INHA
FABP31	0	1.00357	0.479	0.162	0	3	FABP3
ZFAND61	0	0.982507	0.728	0.354	0	3	ZFAND6
C4orf481	0	0.97534	0.616	0.23	0	3	C4orf48
IFI61	0	0.975297	0.784	0.396	0	3	IFI6
LAPTM4B1	0	0.955201	0.665	0.293	0	3	LAPTM4B
COPE1	0	0.947391	0.736	0.369	0	3	COPE
ENO11	0	0.94358	0.826	0.443	0	3	ENO1
PRDX61	0	0.922042	0.819	0.503	0	3	PRDX6
REEP61	0	0.911586	0.494	0.179	0	3	REEP6
APOA11	0	0.903645	0.732	0.306	0	3	APOA1
IFI271	0	0.900153	0.921	0.652	0	3	IFI27
CLU1	0	0.892764	0.928	0.519	0	3	CLU
ENSMMUG000000602871	0	0.890346	0.733	0.4	0	3	ENSMMUG00000060287
DYNLL11	0	0.860952	0.781	0.471	0	3	DYNLL1
AMH1	0	0.807486	0.968	0.434	0	3	AMH
UBB1	0	0.803731	0.981	0.872	0	3	UBB
SERPINA51	0	0.792243	0.586	0.235	0	3	SERPINA5
MYL12A	0	0.725266	0.894	0.697	0	3	MYL12A
RPL28	0	0.628412	0.994	0.955	0	3	RPL28
RPS15	0	0.481839	0.987	0.972	0	3	RPS15
RPL3	0	0.399245	0.988	0.968	0	3	RPL3
ENSMMUG000000627921	2.03394e-306	0.870479	0.362	0.104	3.3562e-302	3	ENSMMUG00000062792
EIF4EBP11	2.72862e-301	0.880572	0.57	0.25	4.5025e-297	3	EIF4EBP1
ATP5F1E1	2.40314e-299	0.670619	0.866	0.643	3.96542e-295	3	ATP5F1E
ENSMMUG000000533201	7.75862e-299	0.909105	0.427	0.144	1.28025e-294	3	ENSMMUG00000053320
SKP1	1.05246e-296	0.641675	0.873	0.67	1.73666e-292	3	SKP1
FTH1.1	9.2905e-296	0.496643	0.948	0.856	1.53302e-291	3	FTH1.1
HMGN51	1.2059e-291	0.877529	0.585	0.256	1.98985e-287	3	HMGN5
ADH51	3.84721e-287	0.853052	0.653	0.342	6.34827e-283	3	ADH5
SCG51	2.90779e-272	0.834495	0.431	0.151	4.79814e-268	3	SCG5
ISYNA11	1.11119e-262	0.79166	0.583	0.272	1.83358e-258	3	ISYNA1
MYL61	8.41888e-260	0.587468	0.888	0.737	1.3892e-255	3	MYL6
CYB5A1	6.32551e-259	0.862311	0.492	0.207	1.04377e-254	3	CYB5A
SMS1	2.08374e-258	0.844174	0.541	0.249	3.43838e-254	3	SMS
PYCARD1	1.6128e-253	0.841098	0.37	0.124	2.66127e-249	3	PYCARD
MARCKSL11	3.13729e-250	0.830601	0.646	0.355	5.17684e-246	3	MARCKSL1
LAPTM4A	2.59814e-244	0.548126	0.915	0.79	4.2872e-240	3	LAPTM4A
RPS29	1.18708e-243	0.312834	0.995	0.991	1.95879e-239	3	RPS29
GAS61	7.15051e-232	0.659573	0.692	0.378	1.1799e-227	3	GAS6
NUDT111	1.35226e-231	0.850854	0.358	0.124	2.23136e-227	3	NUDT11
TCEAL91	6.08205e-229	0.729623	0.762	0.539	1.0036e-224	3	TCEAL9
WFDC21	1.23583e-222	0.820977	0.344	0.118	2.03924e-218	3	WFDC2
HPCAL11	1.72962e-222	0.803452	0.453	0.193	2.85405e-218	3	HPCAL1
ALDH1A11	2.58961e-219	0.808966	0.546	0.27	4.27311e-215	3	ALDH1A1
PRDX11	5.90927e-218	0.737548	0.666	0.401	9.75088e-214	3	PRDX1
MGST31	1.07738e-216	0.655222	0.743	0.506	1.77778e-212	3	MGST3
TSPO1	1.02451e-210	0.744735	0.574	0.305	1.69055e-206	3	TSPO
RPLP2	2.08946e-209	0.308266	0.989	0.98	3.44782e-205	3	RPLP2
ENSMMUG00000055584	1.8494e-208	0.48687	0.901	0.796	3.0517e-204	3	ENSMMUG00000055584
GSTM31	1.212e-205	0.735071	0.785	0.571	1.99992e-201	3	GSTM3
CTSV1	5.57595e-204	0.845381	0.397	0.155	9.20087e-200	3	CTSV
ENSMMUG000000304081	7.07307e-201	0.685162	0.646	0.389	1.16713e-196	3	ENSMMUG00000030408
MT31	2.5004e-196	0.752714	0.276	0.086	4.12591e-192	3	MT3
STMN11	1.96631e-195	0.704975	0.662	0.406	3.24461e-191	3	STMN1
CFL1	2.47705e-195	0.623527	0.754	0.527	4.08739e-191	3	CFL1
GMPR1	4.35616e-195	0.776712	0.441	0.197	7.1881e-191	3	GMPR
TCEAL51	6.77326e-195	0.882019	0.378	0.152	1.11766e-190	3	TCEAL5
ENSMMUG00000017466	7.90482e-193	0.558202	0.818	0.633	1.30437e-188	3	ENSMMUG00000017466
ENSMMUG00000012140	2.28987e-192	0.37833	0.969	0.931	3.77852e-188	3	ENSMMUG00000012140
CST31	7.11825e-191	0.455215	0.875	0.68	1.17458e-186	3	CST3
PDLIM41	5.63413e-189	0.73904	0.408	0.174	9.29687e-185	3	PDLIM4
ENSMMUG000000319111	2.65411e-186	0.737806	0.281	0.092	4.37955e-182	3	ENSMMUG00000031911
ITM2B	2.22456e-184	0.382321	0.953	0.907	3.67074e-180	3	ITM2B
ARPC21	5.02556e-182	0.702724	0.552	0.303	8.29267e-178	3	ARPC2
RPL8	4.86536e-178	0.31955	0.974	0.951	8.02834e-174	3	RPL8
COX7B1	7.07741e-177	0.616393	0.717	0.501	1.16784e-172	3	COX7B
IFI27L2	2.01077e-176	0.487917	0.867	0.747	3.31798e-172	3	IFI27L2
SLC39A41	7.45683e-171	0.731	0.387	0.168	1.23045e-166	3	SLC39A4
ENSMMUG000000491541	1.97651e-170	0.665854	0.612	0.371	3.26144e-166	3	ENSMMUG00000049154
TUBA1A1	7.05463e-169	0.478417	0.878	0.731	1.16408e-164	3	TUBA1A
TESC1	6.59763e-168	0.696831	0.251	0.082	1.08868e-163	3	TESC
ENSMMUG000000451231	1.12614e-162	0.541001	0.762	0.565	1.85825e-158	3	ENSMMUG00000045123
ENSMMUG00000056354	4.678e-162	0.470618	0.846	0.718	7.71917e-158	3	ENSMMUG00000056354
HMGN41	8.79634e-161	0.710796	0.415	0.197	1.45148e-156	3	HMGN4
SERPINB61	3.49472e-159	0.725608	0.372	0.163	5.76663e-155	3	SERPINB6
ATP1B11	4.56358e-158	0.642712	0.551	0.304	7.53036e-154	3	ATP1B1
ATP5PF	8.8687e-158	0.570909	0.727	0.535	1.46342e-153	3	ATP5PF
OAZ11	4.45475e-157	0.65957	0.501	0.269	7.35078e-153	3	OAZ1
TF1	5.35851e-154	0.61066	0.378	0.162	8.84208e-150	3	TF
GTF2H51	2.07325e-150	0.690488	0.424	0.209	3.42107e-146	3	GTF2H5
JPT1	1.37496e-149	0.437862	0.873	0.778	2.26882e-145	3	JPT1
RPS13	5.67103e-148	0.282762	0.991	0.978	9.35776e-144	3	RPS13
TOMM7	4.19418e-147	0.40189	0.891	0.81	6.92082e-143	3	TOMM7
RAC31	1.12166e-146	0.67137	0.306	0.123	1.85085e-142	3	RAC3
UBA52	3.01758e-146	0.295139	0.962	0.933	4.97932e-142	3	UBA52
ATP5C1	1.50183e-144	0.638373	0.588	0.376	2.47817e-140	3	ATP5C1
SNRPN1	2.80269e-144	0.664567	0.487	0.27	4.62471e-140	3	SNRPN
BUD231	6.6268e-143	0.598438	0.464	0.245	1.09349e-138	3	BUD23
DCXR1	8.38053e-143	0.675118	0.473	0.254	1.38287e-138	3	DCXR
NDUFS81	6.28063e-141	0.655205	0.466	0.251	1.03637e-136	3	NDUFS8
SOD1	7.90627e-141	0.528708	0.739	0.57	1.30461e-136	3	SOD1
TNNT11	1.72289e-140	0.62147	0.511	0.286	2.84294e-136	3	TNNT1
TCEA31	1.76779e-138	0.630343	0.492	0.272	2.91704e-134	3	TCEA3
ALDOA	2.53508e-138	0.576731	0.655	0.454	4.18313e-134	3	ALDOA
FDXR1	5.53225e-138	0.629893	0.413	0.205	9.12876e-134	3	FDXR
SAT1	2.76995e-135	0.728388	0.4	0.201	4.57069e-131	3	SAT1
PTGDS1	2.09509e-134	0.718147	0.324	0.141	3.4571e-130	3	PTGDS
ENSMMUG000000224281	3.03031e-134	0.634906	0.551	0.342	5.00032e-130	3	ENSMMUG00000022428
JAM21	7.53427e-130	0.622753	0.311	0.134	1.24323e-125	3	JAM2
RPL27	1.454e-125	0.290586	0.97	0.956	2.39924e-121	3	RPL27
RPL31.1	6.52469e-124	0.371179	0.932	0.904	1.07664e-119	3	RPL31.1
ROMO11	1.22981e-119	0.522103	0.686	0.512	2.02932e-115	3	ROMO1
TSTA31	2.21045e-119	0.617735	0.374	0.188	3.64746e-115	3	TSTA3
NDUFB5	7.51184e-114	0.562883	0.487	0.292	1.23953e-109	3	NDUFB5
C16H17orf49	7.28024e-112	0.475932	0.682	0.507	1.20131e-107	3	C16H17orf49
SVIP1	1.31488e-111	0.643986	0.265	0.113	2.16968e-107	3	SVIP
UBL5	7.58439e-111	0.531347	0.586	0.391	1.2515e-106	3	UBL5
SRP14	2.79503e-110	0.387721	0.844	0.762	4.61208e-106	3	SRP14
BRK1	2.76676e-108	0.482025	0.699	0.543	4.56544e-104	3	BRK1
RTRAF	1.08874e-107	0.556683	0.578	0.39	1.79653e-103	3	RTRAF
HNRNPH2	1.34767e-105	0.365512	0.856	0.767	2.22379e-101	3	HNRNPH2
RPS27L	3.68631e-104	0.542234	0.573	0.399	6.08278e-100	3	RPS27L
COX5B	2.31876e-103	0.483027	0.669	0.506	3.82618e-99	3	COX5B
CALM31	7.81955e-103	0.560359	0.472	0.285	1.2903e-98	3	CALM3
SOX91	1.14126e-102	0.509742	0.333	0.157	1.88319e-98	3	SOX9
ENSMMUG000000445851	1.37502e-100	0.479814	0.666	0.502	2.26892e-96	3	ENSMMUG00000044585
PTOV11	1.01715e-98	0.518187	0.553	0.371	1.67841e-94	3	PTOV1
TMEM258	1.05907e-97	0.481572	0.614	0.435	1.74757e-93	3	TMEM258
UNC1191	1.12381e-97	0.56524	0.296	0.143	1.85441e-93	3	UNC119
ACTB	5.14321e-97	0.254784	0.955	0.898	8.4868e-93	3	ACTB
RPS11	6.1296e-96	0.334957	0.883	0.824	1.01145e-91	3	RPS11
PAIP2	6.45081e-96	0.541276	0.53	0.353	1.06445e-91	3	PAIP2
IGFBP2	1.11295e-94	0.33265	0.402	0.217	1.83648e-90	3	IGFBP2
GPX41	1.96392e-93	0.603372	0.292	0.143	3.24066e-89	3	GPX4
GSTP1	3.74103e-93	0.415736	0.756	0.626	6.17308e-89	3	GSTP1
BCAM1	2.51679e-91	0.452	0.425	0.24	4.15295e-87	3	BCAM
ENSMMUG000000221401	5.17418e-91	0.565109	0.257	0.118	8.53791e-87	3	ENSMMUG00000022140
TECR1	3.10412e-90	0.539062	0.405	0.232	5.12211e-86	3	TECR
C3H7orf501	3.85057e-90	0.483528	0.532	0.351	6.35382e-86	3	C3H7orf50
COX7C	6.67503e-90	0.380456	0.776	0.652	1.10145e-85	3	COX7C
ATP5MC2	4.18697e-88	0.392274	0.748	0.629	6.90893e-84	3	ATP5MC2
ETFB1	2.25905e-87	0.509833	0.466	0.295	3.72765e-83	3	ETFB
GAMT1	2.45951e-87	0.516402	0.353	0.19	4.05843e-83	3	GAMT
CD320	2.0933e-86	0.450633	0.425	0.251	3.45415e-82	3	CD320
FLYWCH21	2.61389e-86	0.582592	0.311	0.162	4.31317e-82	3	FLYWCH2
CALR1	5.56694e-86	0.396111	0.756	0.594	9.186e-82	3	CALR
SLC2A11	8.14258e-85	0.469904	0.667	0.527	1.34361e-80	3	SLC2A11
CTNNAL11	9.48831e-84	0.507893	0.39	0.225	1.56567e-79	3	CTNNAL1
COX7A21	6.72388e-83	0.492092	0.577	0.424	1.10951e-78	3	COX7A2
PMEL1	4.85882e-82	0.48164	0.262	0.124	8.01754e-78	3	PMEL
ARPC1B	2.06063e-81	0.484058	0.486	0.318	3.40025e-77	3	ARPC1B
SPINT21	1.58069e-80	0.464935	0.502	0.332	2.60829e-76	3	SPINT2
CYCS	2.3087e-79	0.505959	0.337	0.187	3.80959e-75	3	CYCS
MGST21	1.64647e-78	0.53806	0.284	0.146	2.71684e-74	3	MGST2
ENSMMUG00000001645	2.21766e-78	0.364279	0.761	0.642	3.65937e-74	3	ENSMMUG00000001645
GYG11	1.09624e-77	0.612711	0.371	0.226	1.8089e-73	3	GYG1
ATP5MG	3.62208e-77	0.443268	0.586	0.432	5.97679e-73	3	ATP5MG
ATP5F1A1	5.90379e-77	0.448509	0.607	0.454	9.74185e-73	3	ATP5F1A
CXXC51	2.82779e-76	0.542775	0.284	0.148	4.66614e-72	3	CXXC5
DMAC11	1.28626e-75	0.487566	0.424	0.268	2.12245e-71	3	DMAC1
ENSMMUG00000051239	2.26376e-75	0.460518	0.589	0.439	3.73543e-71	3	ENSMMUG00000051239
COX4I11	1.11288e-74	0.345676	0.765	0.656	1.83636e-70	3	COX4I1
ENSMMUG000000474811	2.37727e-74	0.464128	0.502	0.341	3.92273e-70	3	ENSMMUG00000047481
GAPDH	4.30335e-74	0.344914	0.832	0.759	7.10095e-70	3	GAPDH
NDUFB11	1.62056e-73	0.474171	0.482	0.325	2.67408e-69	3	NDUFB11
NDUFB2	4.67239e-73	0.437979	0.587	0.439	7.70992e-69	3	NDUFB2
EPN11	8.49877e-73	0.508328	0.34	0.196	1.40238e-68	3	EPN1
TMEM1231	5.7536e-71	0.517887	0.382	0.234	9.49401e-67	3	TMEM123
COX171	1.15529e-70	0.514413	0.322	0.182	1.90635e-66	3	COX17
TSEN341	1.60471e-70	0.498479	0.361	0.215	2.64792e-66	3	TSEN34
MYL6B1	2.73658e-70	0.53049	0.347	0.205	4.51563e-66	3	MYL6B
DRAP1	7.67517e-70	0.481564	0.482	0.331	1.26648e-65	3	DRAP1
PRDX5	1.05828e-69	0.462948	0.472	0.322	1.74626e-65	3	PRDX5
ENSMMUG00000061128	6.45758e-69	0.487805	0.368	0.223	1.06557e-64	3	ENSMMUG00000061128
MED251	7.21517e-69	0.469884	0.314	0.175	1.19057e-64	3	MED25
SPARC1	1.21462e-68	0.257353	0.869	0.755	2.00424e-64	3	SPARC
PET1001	3.86286e-68	0.48033	0.337	0.196	6.37411e-64	3	PET100
MBOAT71	5.67877e-68	0.4942	0.278	0.148	9.37053e-64	3	MBOAT7
ACAD101	1.28378e-67	0.461084	0.479	0.328	2.11837e-63	3	ACAD10
UQCRQ1	1.83761e-67	0.467586	0.353	0.211	3.03224e-63	3	UQCRQ
RBBP71	3.72728e-67	0.47779	0.51	0.362	6.15038e-63	3	RBBP7
CCDC691	1.77859e-66	0.463097	0.261	0.136	2.93485e-62	3	CCDC69
C11H12orf57	1.21877e-64	0.311361	0.783	0.687	2.0111e-60	3	C11H12orf57
HYPK1	2.5203e-64	0.460234	0.42	0.275	4.15874e-60	3	HYPK
SCP2	7.77045e-64	0.444987	0.424	0.278	1.2822e-59	3	SCP2
PPP1CA	8.60452e-64	0.472171	0.289	0.161	1.41983e-59	3	PPP1CA
MAMU-A	1.54001e-62	0.448407	0.471	0.318	2.54117e-58	3	MAMU-A
FKBP21	2.06402e-62	0.429013	0.532	0.383	3.40584e-58	3	FKBP2
MRPS6	3.64473e-62	0.452012	0.336	0.199	6.01418e-58	3	MRPS6
TIMM8B1	5.64471e-62	0.451923	0.434	0.291	9.31433e-58	3	TIMM8B
ARF4	1.01458e-61	0.447841	0.521	0.378	1.67416e-57	3	ARF4
PPDPF	1.74464e-61	0.40102	0.551	0.409	2.87883e-57	3	PPDPF
LSM7	5.97228e-61	0.442472	0.393	0.252	9.85485e-57	3	LSM7
COX6B1	6.85753e-61	0.461906	0.487	0.348	1.13156e-56	3	COX6B1
CDK2AP11	1.74318e-60	0.493272	0.384	0.249	2.87642e-56	3	CDK2AP1
ATOX1	4.76639e-60	0.460551	0.374	0.24	7.86502e-56	3	ATOX1
PUF601	9.63289e-60	0.43628	0.425	0.284	1.58952e-55	3	PUF60
NDUFA21	1.60094e-59	0.442415	0.453	0.315	2.64172e-55	3	NDUFA2
TMEM176B	5.11332e-59	0.469638	0.319	0.189	8.43749e-55	3	TMEM176B
SERPINF11	5.6048e-59	0.361109	0.543	0.39	9.24849e-55	3	SERPINF1
BEX4	1.69071e-57	0.434363	0.514	0.383	2.78984e-53	3	BEX4
PSMB6	2.24551e-57	0.434424	0.372	0.239	3.70532e-53	3	PSMB6
ENY21	3.14366e-57	0.472318	0.418	0.287	5.18735e-53	3	ENY2
MRFAP1	7.49613e-57	0.376219	0.629	0.511	1.23694e-52	3	MRFAP1
MRPL23	6.88097e-56	0.417097	0.306	0.181	1.13543e-51	3	MRPL23
GTF3C6	1.54715e-55	0.457101	0.278	0.161	2.55296e-51	3	GTF3C6
PSMB1	3.7871e-55	0.410667	0.534	0.405	6.2491e-51	3	PSMB1
URGCP1	1.20548e-54	0.462346	0.372	0.243	1.98917e-50	3	URGCP
ARF5	3.99594e-54	0.390043	0.53	0.394	6.59369e-50	3	ARF5
HINT21	1.08558e-53	0.459116	0.337	0.214	1.79132e-49	3	HINT2
COX8A	1.31772e-53	0.449411	0.379	0.248	2.17436e-49	3	COX8A
UQCRB	6.22016e-53	0.425829	0.382	0.253	1.02639e-48	3	UQCRB
ISOC21	1.07486e-52	0.483992	0.259	0.148	1.77363e-48	3	ISOC2
EIF1AY	1.51763e-51	0.44754	0.354	0.229	2.50424e-47	3	EIF1AY
GRN1	1.57821e-51	0.401649	0.271	0.156	2.60421e-47	3	GRN
PIN1	2.59388e-51	0.459834	0.313	0.195	4.28017e-47	3	PIN1
DNAJB6	4.73352e-51	0.388923	0.417	0.285	7.81078e-47	3	DNAJB6
NDUFV2	1.82983e-50	0.420465	0.397	0.27	3.0194e-46	3	NDUFV2
GABARAP	5.63411e-50	0.296202	0.739	0.658	9.29684e-46	3	GABARAP
SNRPD2	6.72083e-50	0.382118	0.577	0.457	1.109e-45	3	SNRPD2
UFC1	8.4736e-50	0.419219	0.293	0.178	1.39823e-45	3	UFC1
PSMB3	3.19113e-49	0.411764	0.265	0.155	5.26569e-45	3	PSMB3
HMGN31	3.71673e-49	0.321078	0.667	0.554	6.13298e-45	3	HMGN3
SLC25A43	4.20521e-49	0.433542	0.324	0.207	6.93901e-45	3	SLC25A43
PSME2	3.6418e-48	0.435849	0.276	0.165	6.00933e-44	3	PSME2
RNASEH2C	5.48772e-48	0.434696	0.319	0.204	9.05528e-44	3	RNASEH2C
SNRPD3	1.49844e-47	0.387677	0.409	0.284	2.47258e-43	3	SNRPD3
DDOST1	2.25909e-47	0.325465	0.615	0.491	3.72773e-43	3	DDOST
ENSMMUG00000012419	2.74164e-47	0.361104	0.536	0.421	4.52398e-43	3	ENSMMUG00000012419
TMED3	3.24013e-47	0.403413	0.357	0.235	5.34654e-43	3	TMED3
CAMTA11	3.45274e-47	0.431732	0.258	0.153	5.69737e-43	3	CAMTA1
RBX1	3.49203e-47	0.373745	0.563	0.446	5.7622e-43	3	RBX1
TRAPPC5	4.81423e-47	0.412222	0.34	0.222	7.94396e-43	3	TRAPPC5
SARS1	6.72905e-47	0.435428	0.396	0.275	1.11036e-42	3	SARS
CTSD1	2.61155e-46	0.38105	0.442	0.317	4.30932e-42	3	CTSD
EDF1	6.67968e-46	0.32688	0.544	0.419	1.10221e-41	3	EDF1
DDX241	1.07933e-45	0.272357	0.527	0.382	1.781e-41	3	DDX24
PDRG1	6.45949e-45	0.419749	0.31	0.199	1.06588e-40	3	PDRG1
UBE2I	7.44107e-45	0.391721	0.466	0.344	1.22785e-40	3	UBE2I
SH3BGRL	5.58714e-44	0.402875	0.413	0.294	9.21933e-40	3	SH3BGRL
RDH5	1.07624e-43	0.388525	0.391	0.274	1.77591e-39	3	RDH5
OST4	6.11768e-43	0.352744	0.53	0.416	1.00948e-38	3	OST4
CLIC1	1.12487e-42	0.389412	0.438	0.322	1.85614e-38	3	CLIC1
COX19	1.7773e-42	0.419001	0.338	0.226	2.93272e-38	3	COX19
YJEFN3	2.01404e-42	0.322743	0.544	0.42	3.32337e-38	3	YJEFN3
SSR4	2.642e-42	0.36536	0.526	0.415	4.35956e-38	3	SSR4
WDR83OS	8.23354e-42	0.286598	0.68	0.588	1.35862e-37	3	WDR83OS
SDCBP	1.86856e-41	0.384285	0.424	0.308	3.08331e-37	3	SDCBP
NDUFB8	3.19864e-41	0.388689	0.361	0.248	5.27807e-37	3	NDUFB8
COX5A	4.77725e-41	0.381088	0.313	0.205	7.88295e-37	3	COX5A
ACAA21	5.27915e-41	0.39443	0.276	0.173	8.71112e-37	3	ACAA2
ENSMMUG000000549761	5.61809e-41	0.362335	0.341	0.228	9.27041e-37	3	ENSMMUG00000054976
LSM2	8.85321e-41	0.367473	0.367	0.251	1.46087e-36	3	LSM2
TMEM147	8.92637e-41	0.376742	0.4	0.289	1.47294e-36	3	TMEM147
AP2S1	4.00485e-40	0.375801	0.308	0.201	6.60841e-36	3	AP2S1
BEX21	4.92931e-40	0.443482	0.318	0.213	8.13386e-36	3	BEX2
GHITM	1.05474e-39	0.394818	0.365	0.253	1.74043e-35	3	GHITM
CETN2	1.70503e-39	0.387661	0.329	0.222	2.81348e-35	3	CETN2
NHP2	2.87929e-38	0.402882	0.299	0.198	4.75112e-34	3	NHP2
ATP5F1D	5.34989e-38	0.323655	0.524	0.415	8.82785e-34	3	ATP5F1D
RNF5	5.36099e-38	0.361197	0.323	0.216	8.84617e-34	3	RNF5
LLPH	2.38801e-37	0.394426	0.295	0.194	3.94046e-33	3	LLPH
HMGB1	2.57669e-37	0.280458	0.778	0.73	4.25179e-33	3	HMGB1
PIN4	4.46349e-37	0.394631	0.285	0.186	7.3652e-33	3	PIN4
NDUFB4	4.84298e-37	0.300719	0.582	0.475	7.9914e-33	3	NDUFB4
PSMA2	1.23829e-36	0.363865	0.413	0.307	2.0433e-32	3	PSMA2
NDUFA61	1.57997e-36	0.38327	0.366	0.262	2.60711e-32	3	NDUFA6
ATP5F1B	1.93366e-36	0.352619	0.398	0.291	3.19074e-32	3	ATP5F1B
PFDN6	2.38737e-36	0.390756	0.252	0.159	3.93941e-32	3	PFDN6
BTF3L4	3.8891e-36	0.370273	0.388	0.285	6.4174e-32	3	BTF3L4
RAN	1.1284e-35	0.329751	0.426	0.317	1.86197e-31	3	RAN
PSMB7	1.21654e-35	0.333356	0.525	0.425	2.00742e-31	3	PSMB7
RNF181	1.59722e-35	0.366949	0.331	0.229	2.63558e-31	3	RNF181
ZYX1	3.57458e-35	0.35979	0.258	0.164	5.89842e-31	3	ZYX
ENSMMUG00000017231	5.12501e-35	0.354217	0.373	0.269	8.45678e-31	3	ENSMMUG00000017231
ENSMMUG000000497221	5.32362e-35	0.366303	0.332	0.231	8.7845e-31	3	ENSMMUG00000049722
TMEM59	6.51948e-35	0.280381	0.646	0.568	1.07578e-30	3	TMEM59
CLTA	7.16688e-35	0.279693	0.621	0.531	1.18261e-30	3	CLTA
MZT2B	3.08363e-34	0.343003	0.459	0.358	5.08829e-30	3	MZT2B
NDUFA4	4.06779e-34	0.271574	0.622	0.528	6.71226e-30	3	NDUFA4
CKB	5.47093e-34	0.379694	0.406	0.303	9.02758e-30	3	CKB
RPS4Y2	9.81137e-34	0.322909	0.446	0.344	1.61897e-29	3	RPS4Y2
ST3GAL41	1.16812e-33	0.345563	0.299	0.2	1.92751e-29	3	ST3GAL4
POLR2G	1.37421e-33	0.405643	0.275	0.183	2.26758e-29	3	POLR2G
MDH1	1.41065e-33	0.335883	0.459	0.356	2.32771e-29	3	MDH1
ENSMMUG00000030508	2.81974e-33	0.292258	0.597	0.51	4.65286e-29	3	ENSMMUG00000030508
PSMB2	8.15457e-33	0.347446	0.264	0.173	1.34558e-28	3	PSMB2
ARPC3	8.60237e-33	0.343322	0.388	0.286	1.41948e-28	3	ARPC3
SEC61G	3.49837e-32	0.31725	0.468	0.367	5.77265e-28	3	SEC61G
CHMP2A	3.65709e-32	0.366673	0.342	0.244	6.03457e-28	3	CHMP2A
SNRPD1	3.94735e-32	0.348824	0.38	0.282	6.51352e-28	3	SNRPD1
NDUFA1	1.04768e-31	0.295784	0.525	0.429	1.72878e-27	3	NDUFA1
SLC25A3	1.23455e-31	0.261023	0.642	0.56	2.03713e-27	3	SLC25A3
ANAPC13	1.92664e-31	0.376896	0.364	0.271	3.17915e-27	3	ANAPC13
HIGD2A	2.50268e-31	0.357725	0.311	0.218	4.12968e-27	3	HIGD2A
NAPA	3.0655e-31	0.366175	0.318	0.225	5.05839e-27	3	NAPA
AGA1	3.143e-31	0.338563	0.267	0.176	5.18627e-27	3	AGA
TRMT112	3.37102e-31	0.290676	0.565	0.475	5.56252e-27	3	TRMT112
CIAO2B	3.43991e-31	0.340328	0.281	0.19	5.67619e-27	3	CIAO2B
MORF4L1	3.44123e-31	0.352138	0.423	0.328	5.67838e-27	3	MORF4L1
DCTN3	7.25076e-31	0.316118	0.494	0.403	1.19645e-26	3	DCTN3
TIMM10B1	2.23519e-30	0.350054	0.296	0.206	3.68828e-26	3	TIMM10B
TBCA.1	3.13133e-30	0.318426	0.446	0.351	5.167e-26	3	TBCA.1
C1QBP	3.81724e-30	0.336542	0.374	0.277	6.29882e-26	3	C1QBP
TMEM1601	5.39978e-30	0.345808	0.276	0.187	8.91017e-26	3	TMEM160
NDUFS6	7.33208e-30	0.344186	0.289	0.199	1.20987e-25	3	NDUFS6
ENSMMUG00000053146	9.60526e-30	0.334202	0.428	0.333	1.58496e-25	3	ENSMMUG00000053146
NDUFAB1	3.4667e-29	0.345675	0.296	0.208	5.72041e-25	3	NDUFAB1
POLR2F	5.97677e-29	0.334463	0.412	0.319	9.86228e-25	3	POLR2F
AMDHD1	8.96596e-29	0.336136	0.296	0.208	1.47947e-24	3	AMDHD1
PDIA61	1.19677e-28	0.311685	0.393	0.295	1.97479e-24	3	PDIA6
BUD31	1.21254e-28	0.372766	0.263	0.18	2.00081e-24	3	BUD31
H2AFV	3.15459e-28	0.33134	0.329	0.238	5.2054e-24	3	H2AFV
NDFIP1	4.948e-28	0.250512	0.536	0.439	8.1647e-24	3	NDFIP1
ANXA61	3.46498e-27	0.347559	0.305	0.219	5.71757e-23	3	ANXA6
PARK7	4.76898e-27	0.29533	0.397	0.303	7.86929e-23	3	PARK7
ANAPC11	4.95072e-27	0.321849	0.358	0.269	8.16918e-23	3	ANAPC11
PFDN2	5.50942e-27	0.327317	0.289	0.203	9.0911e-23	3	PFDN2
BTG31	2.67957e-26	0.342208	0.329	0.241	4.42155e-22	3	BTG3
AKR1C1	2.80798e-26	0.285398	0.316	0.224	4.63345e-22	3	AKR1C1
ENSMMUG00000022769	2.98208e-26	0.279079	0.517	0.433	4.92073e-22	3	ENSMMUG00000022769
OSBPL2	3.37597e-26	0.289268	0.316	0.226	5.57069e-22	3	OSBPL2
ENSMMUG000000187401	3.56999e-26	0.262895	0.466	0.37	5.89084e-22	3	ENSMMUG00000018740
ENSMMUG00000060923	3.9534e-26	0.285504	0.489	0.397	6.52351e-22	3	ENSMMUG00000060923
SYNGR1	5.23276e-26	0.319624	0.275	0.192	8.63457e-22	3	SYNGR1
SNRPB	2.11206e-25	0.296226	0.47	0.387	3.48511e-21	3	SNRPB
C14orf156	2.54335e-25	0.278345	0.495	0.409	4.19679e-21	3	C14orf156
EIF6	2.98813e-25	0.312965	0.357	0.271	4.93071e-21	3	EIF6
TMA7	3.18422e-25	0.256501	0.524	0.439	5.25428e-21	3	TMA7
U2AF21	3.46721e-25	0.312315	0.258	0.178	5.72125e-21	3	U2AF2
LSM4	5.38913e-25	0.313907	0.275	0.194	8.89261e-21	3	LSM4
MDH2	5.96839e-25	0.334431	0.256	0.178	9.84844e-21	3	MDH2
PTPMT1	6.82335e-25	0.323845	0.293	0.211	1.12592e-20	3	PTPMT1
NDUFB7	7.95871e-25	0.28978	0.485	0.399	1.31327e-20	3	NDUFB7
GADD45GIP1	9.8829e-25	0.332259	0.261	0.182	1.63078e-20	3	GADD45GIP1
MRPL40	1.22615e-24	0.349466	0.295	0.214	2.02327e-20	3	MRPL40
AURKAIP1	2.31989e-24	0.321275	0.286	0.206	3.82805e-20	3	AURKAIP1
FAM127C1	2.70858e-24	0.317202	0.312	0.227	4.46943e-20	3	FAM127C
ANAPC16	7.74509e-24	0.291985	0.318	0.233	1.27802e-19	3	ANAPC16
SELENOK	1.78913e-23	0.313974	0.326	0.245	2.95225e-19	3	SELENOK
ZFAND51	1.79587e-23	0.289705	0.336	0.249	2.96337e-19	3	ZFAND5
NDUFA11	2.23213e-23	0.262692	0.404	0.316	3.68324e-19	3	NDUFA11
SNRPE	3.51927e-23	0.262238	0.584	0.509	5.80715e-19	3	SNRPE
SEC61B	4.18547e-23	0.269024	0.493	0.411	6.90644e-19	3	SEC61B
VDAC1	7.94617e-23	0.312741	0.264	0.188	1.3112e-18	3	VDAC1
UQCRFS1	9.29199e-23	0.306096	0.333	0.253	1.53327e-18	3	UQCRFS1
EIF3M	9.87773e-23	0.27626	0.39	0.305	1.62992e-18	3	EIF3M
GABARAPL2	1.15622e-22	0.289256	0.44	0.359	1.90788e-18	3	GABARAPL2
ECHS1	1.48791e-22	0.324666	0.257	0.183	2.4552e-18	3	ECHS1
ENSMMUG00000052202	2.10866e-22	0.302664	0.353	0.274	3.4795e-18	3	ENSMMUG00000052202
ATP5MC1	2.51188e-22	0.311371	0.328	0.246	4.14485e-18	3	ATP5MC1
ERGIC3	3.37086e-22	0.268769	0.47	0.388	5.56226e-18	3	ERGIC3
LAMTOR4	8.65898e-22	0.314613	0.329	0.252	1.42882e-17	3	LAMTOR4
CCDC56	1.51053e-21	0.286201	0.256	0.182	2.49252e-17	3	CCDC56
KRTCAP2	4.09919e-21	0.260286	0.513	0.435	6.76407e-17	3	KRTCAP2
H2AFY	7.94573e-21	0.313872	0.258	0.187	1.31113e-16	3	H2AFY
GTF2A2	9.95619e-21	0.302182	0.255	0.184	1.64287e-16	3	GTF2A2
QDPR	1.37365e-20	0.281965	0.252	0.18	2.26667e-16	3	QDPR
SEM1	4.81812e-20	0.255986	0.486	0.413	7.95038e-16	3	SEM1
TPI1	5.07517e-20	0.254117	0.493	0.418	8.37453e-16	3	TPI1
ATP5PD	6.86421e-20	0.287224	0.355	0.28	1.13266e-15	3	ATP5PD
PGK1	7.45558e-20	0.294917	0.304	0.231	1.23024e-15	3	PGK1
TRIR	1.22124e-19	0.252886	0.459	0.382	2.01517e-15	3	TRIR
ESD	1.31632e-19	0.273808	0.304	0.23	2.17206e-15	3	ESD
RBM8A	1.64567e-19	0.284541	0.322	0.251	2.71553e-15	3	RBM8A
SUMO1	2.39558e-19	0.269047	0.388	0.312	3.95295e-15	3	SUMO1
PSMA7	3.51513e-19	0.293791	0.391	0.318	5.80031e-15	3	PSMA7
MTCH1	9.42871e-19	0.285709	0.298	0.229	1.55583e-14	3	MTCH1
MRPS21	1.1847e-18	0.266345	0.269	0.199	1.95487e-14	3	MRPS21
UBE2L3	1.617e-18	0.279891	0.292	0.22	2.66821e-14	3	UBE2L3
PSMB5	3.00602e-18	0.290826	0.304	0.234	4.96023e-14	3	PSMB5
FNTB1	2.70916e-17	0.312879	0.299	0.234	4.47039e-13	3	FNTB
MICOS13	6.5542e-17	0.253651	0.379	0.31	1.08151e-12	3	MICOS13
ERP29.1	1.08886e-16	0.27328	0.287	0.222	1.79673e-12	3	ERP29.1
DAD1	2.46367e-16	0.27145	0.377	0.309	4.06531e-12	3	DAD1
BZW1	2.4684e-16	0.264883	0.308	0.242	4.07311e-12	3	BZW1
SLC25A4	4.73412e-16	0.289386	0.265	0.204	7.81178e-12	3	SLC25A4
TMED101	7.21431e-16	0.287813	0.293	0.229	1.19043e-11	3	TMED10
ELOC	5.73578e-15	0.250991	0.362	0.298	9.46462e-11	3	ELOC
STUB1	2.48538e-14	0.265026	0.295	0.234	4.10113e-10	3	STUB1
PYURF	7.68369e-14	0.252025	0.347	0.285	1.26789e-09	3	PYURF
PNRC21	2.2863e-12	0.254993	0.265	0.213	3.77262e-08	3	PNRC2
GDI2	2.70515e-11	0.25223	0.338	0.29	4.46377e-07	3	GDI2
PCMT1	3.52688e-10	0.2608	0.273	0.228	5.8197e-06	3	PCMT1
WFDC1	0	1.44453	0.486	0.065	0	4	WFDC1
DLK1	0	1.2765	0.773	0.301	0	4	DLK1
LAMC3	0	1.12522	0.473	0.115	0	4	LAMC3
BGN	0	1.0914	0.453	0.102	0	4	BGN
IGFBP7	0	1.04849	0.939	0.618	0	4	IGFBP7
COL1A11	0	0.984686	0.913	0.506	0	4	COL1A1
ACTA2	0	0.974153	0.263	0.033	0	4	ACTA2
HTRA3	0	0.964139	0.632	0.242	0	4	HTRA3
MYH11	0	0.938505	0.514	0.161	0	4	MYH11
COL3A11	0	0.934801	0.687	0.281	0	4	COL3A1
COL1A2	0	0.910423	0.784	0.391	0	4	COL1A2
SPARCL1	0	0.784218	0.71	0.331	0	4	SPARCL1
DCN2	3.47481e-306	0.608394	0.983	0.664	5.73379e-302	4	DCN
MATN2	7.04185e-301	0.877743	0.312	0.075	1.16197e-296	4	MATN2
LAMB1	1.32098e-285	0.762552	0.272	0.058	2.17975e-281	4	LAMB1
TAGLN	7.51345e-273	1.10567	0.281	0.067	1.23979e-268	4	TAGLN
TPD52L1	3.3419e-271	0.833129	0.462	0.165	5.51447e-267	4	TPD52L1
MMP21	2.86541e-261	0.728462	0.759	0.415	4.72822e-257	4	MMP2
TIMP1	4.32121e-252	0.811445	0.95	0.811	7.13043e-248	4	TIMP1
ECM1	2.42953e-249	0.730825	0.272	0.066	4.00897e-245	4	ECM1
CALD1	1.49272e-238	0.696842	0.755	0.428	2.46314e-234	4	CALD1
EDNRA	1.12207e-237	0.819945	0.33	0.097	1.85153e-233	4	EDNRA
QPCT	2.31268e-225	0.70756	0.306	0.086	3.81615e-221	4	QPCT
CYP1B1	2.06484e-224	0.786909	0.425	0.155	3.40719e-220	4	CYP1B1
NID1	2.96972e-220	0.73289	0.436	0.162	4.90034e-216	4	NID1
ALLC	2.26627e-202	0.689572	0.269	0.075	3.73958e-198	4	ALLC
FBLIM1	2.13837e-198	0.65224	0.282	0.082	3.52853e-194	4	FBLIM1
MSC	7.91239e-181	0.598363	0.303	0.097	1.30562e-176	4	MSC
PDGFRB	1.49634e-180	0.670599	0.396	0.152	2.46911e-176	4	PDGFRB
PDLIM3	6.43904e-164	0.657644	0.477	0.225	1.06251e-159	4	PDLIM3
MGP	2.77384e-160	0.658894	0.562	0.289	4.57711e-156	4	MGP
EMILIN1	5.20096e-158	0.609752	0.347	0.132	8.5821e-154	4	EMILIN1
PLAC1	2.02805e-155	0.582412	0.317	0.114	3.34649e-151	4	PLAC1
SERPINH11	1.07179e-151	0.606458	0.556	0.298	1.76857e-147	4	SERPINH1
COL4A2	1.10678e-145	0.70348	0.409	0.188	1.8263e-141	4	COL4A2
TCF211	1.72019e-141	0.590959	0.419	0.187	2.83849e-137	4	TCF21
DPT1	1.42492e-140	0.519872	0.588	0.313	2.35125e-136	4	DPT
ENG	1.28417e-132	0.641874	0.451	0.225	2.119e-128	4	ENG
COL6A22	1.02878e-124	0.46267	0.711	0.44	1.69759e-120	4	COL6A2
PLAC91	9.43641e-121	0.529434	0.553	0.309	1.5571e-116	4	PLAC9
HTRA12	1.35031e-120	0.51715	0.535	0.297	2.22815e-116	4	HTRA1
LTBP42	1.27061e-114	0.492145	0.573	0.325	2.09664e-110	4	LTBP4
MEST1	3.39788e-113	0.588666	0.513	0.286	5.60684e-109	4	MEST
LRP1	1.57498e-107	0.557821	0.458	0.248	2.59888e-103	4	LRP1
HIPK1	2.01249e-107	0.550383	0.361	0.17	3.32081e-103	4	HIPK1
DHRS22	3.05699e-106	0.513636	0.403	0.198	5.04434e-102	4	DHRS2
SLC7A10	2.3377e-104	0.514452	0.279	0.115	3.85744e-100	4	SLC7A10
ITM2C	8.67499e-103	0.510158	0.518	0.307	1.43146e-98	4	ITM2C
C1S2	4.37489e-100	0.391701	0.574	0.328	7.21901e-96	4	C1S
RRBP1	4.79783e-99	0.581273	0.279	0.122	7.9169e-95	4	RRBP1
NR2F22	2.68975e-96	0.428356	0.485	0.265	4.43835e-92	4	NR2F2
TMEM98	9.3692e-96	0.50142	0.328	0.156	1.54601e-91	4	TMEM98
EEF1A1	4.86457e-93	0.283025	0.973	0.955	8.02702e-89	4	EEF1A1
RASSF2	8.39619e-93	0.488421	0.279	0.123	1.38546e-88	4	RASSF2
EPHX11	3.89719e-87	0.452368	0.4	0.211	6.43076e-83	4	EPHX1
ENSMMUG00000004441	1.05628e-81	0.430227	0.486	0.289	1.74296e-77	4	ENSMMUG00000004441
CYGB	4.17071e-77	0.441945	0.32	0.16	6.88209e-73	4	CYGB
FLNA1	1.13992e-75	0.524219	0.276	0.137	1.88097e-71	4	FLNA
ANGPTL4	4.23691e-74	0.484707	0.301	0.153	6.99133e-70	4	ANGPTL4
ZFP36L11	9.21059e-74	0.365969	0.706	0.52	1.51984e-69	4	ZFP36L1
SNAI2	6.49078e-72	0.372757	0.264	0.123	1.07104e-67	4	SNAI2
GOLM1	1.40274e-61	0.37405	0.335	0.184	2.31466e-57	4	GOLM1
RCN1	9.39562e-61	0.381791	0.355	0.204	1.55037e-56	4	RCN1
SERPINE22	7.4174e-60	0.349621	0.621	0.444	1.22395e-55	4	SERPINE2
C1R1	7.72822e-60	0.346175	0.44	0.268	1.27523e-55	4	C1R
ENSMMUG000000322311	1.30381e-59	0.393711	0.42	0.257	2.15142e-55	4	ENSMMUG00000032231
EFEMP2	1.3585e-59	0.416861	0.286	0.152	2.24166e-55	4	EFEMP2
GPX7	7.38198e-59	0.373157	0.275	0.144	1.2181e-54	4	GPX7
TPM2	7.01158e-57	0.292269	0.334	0.186	1.15698e-52	4	TPM2
TTC3	5.82368e-55	0.35818	0.281	0.152	9.60965e-51	4	TTC3
ENSMMUG00000061959	3.24981e-54	0.318344	0.715	0.58	5.3625e-50	4	ENSMMUG00000061959
MMP14	1.24408e-52	0.393703	0.271	0.145	2.05285e-48	4	MMP14
ENSMMUG00000012273	1.64198e-52	0.306426	0.687	0.536	2.70943e-48	4	ENSMMUG00000012273
AKAP17A	2.08824e-52	0.435362	0.254	0.137	3.44581e-48	4	AKAP17A
SEPTIN7	1.33295e-51	0.377792	0.498	0.343	2.1995e-47	4	SEPTIN7
ITGB1	1.47863e-50	0.377317	0.478	0.33	2.43988e-46	4	ITGB1
EEF1B2	1.91881e-50	0.281901	0.746	0.648	3.16623e-46	4	EEF1B2
SEC62	6.25494e-50	0.307019	0.607	0.448	1.03213e-45	4	SEC62
CYBA	1.31485e-49	0.293782	0.314	0.177	2.16963e-45	4	CYBA
MFAP21	8.04982e-49	0.345732	0.294	0.165	1.3283e-44	4	MFAP2
FKBP7	2.43596e-48	0.324133	0.284	0.16	4.01958e-44	4	FKBP7
MAGEH1	2.11825e-47	0.373241	0.377	0.237	3.49532e-43	4	MAGEH1
SDC2	1.93812e-46	0.375554	0.312	0.186	3.19809e-42	4	SDC2
SSPN	1.13298e-45	0.315945	0.278	0.156	1.86953e-41	4	SSPN
FSTL11	2.03573e-45	0.312075	0.393	0.246	3.35916e-41	4	FSTL1
SOD3	2.82152e-42	0.346859	0.336	0.21	4.65579e-38	4	SOD3
FAM3C	6.81047e-41	0.353664	0.289	0.175	1.1238e-36	4	FAM3C
SLC66A3	1.09425e-40	0.282023	0.254	0.142	1.80562e-36	4	SLC66A3
EPB41L21	2.42358e-40	0.338339	0.265	0.156	3.99915e-36	4	EPB41L2
CALU	2.31862e-38	0.35133	0.308	0.194	3.82595e-34	4	CALU
TPM4	4.7447e-38	0.328868	0.522	0.394	7.82923e-34	4	TPM4
RND31	6.95368e-38	0.264549	0.279	0.165	1.14743e-33	4	RND3
SOX41	1.44926e-34	0.355892	0.479	0.355	2.39143e-30	4	SOX4
NOVA12	1.55829e-34	0.273877	0.351	0.229	2.57134e-30	4	NOVA1
CD63	1.60923e-34	0.255261	0.78	0.67	2.6554e-30	4	CD63
PLAGL1	3.3924e-31	0.323456	0.259	0.163	5.59779e-27	4	PLAGL1
TAX1BP3	5.94711e-31	0.267388	0.426	0.307	9.81332e-27	4	TAX1BP3
CTNNB1	1.86157e-30	0.299742	0.352	0.243	3.07178e-26	4	CTNNB1
PHF14	1.43544e-29	0.275451	0.429	0.313	2.36862e-25	4	PHF14
MAGED1	1.70036e-29	0.287601	0.288	0.188	2.80577e-25	4	MAGED1
SMARCA2	2.63382e-29	0.263276	0.283	0.184	4.34607e-25	4	SMARCA2
TMED9	4.79417e-29	0.285725	0.425	0.315	7.91086e-25	4	TMED9
P4HB	4.85035e-29	0.270405	0.444	0.329	8.00356e-25	4	P4HB
NFIA	2.23358e-28	0.255587	0.388	0.275	3.68563e-24	4	NFIA
FSCN11	3.08447e-27	0.295054	0.344	0.243	5.08969e-23	4	FSCN1
ENSMMUG000000633161	2.12588e-26	0.269257	0.337	0.237	3.50792e-22	4	ENSMMUG00000063316
TIA11	6.14712e-26	0.299748	0.255	0.168	1.01434e-21	4	TIA1
C12orf51	1.67934e-21	0.266782	0.286	0.2	2.77108e-17	4	C12orf5
IGFBP3	0	1.91462	0.655	0.176	0	5	IGFBP3
IGFBP6	0	1.68442	0.66	0.267	0	5	IGFBP6
COL1A12	0	1.05148	0.89	0.521	0	5	COL1A1
DCN3	2.72274e-307	0.918773	0.973	0.675	4.49279e-303	5	DCN
S100A61	1.20018e-300	1.15759	0.771	0.376	1.98042e-296	5	S100A6
RARRES21	2.05682e-254	0.833393	0.901	0.628	3.39396e-250	5	RARRES2
VIM1	7.37275e-198	0.609104	0.954	0.806	1.21658e-193	5	VIM
ENSMMUG00000014256	2.03331e-191	0.493852	0.973	0.796	3.35517e-187	5	ENSMMUG00000014256
MGP1	1.58302e-190	0.998764	0.616	0.294	2.61214e-186	5	MGP
IGFBP5	1.82805e-187	0.660932	0.904	0.6	3.01647e-183	5	IGFBP5
PMP222	1.34575e-180	0.786921	0.647	0.313	2.22062e-176	5	PMP22
THY1	1.48588e-180	0.841318	0.28	0.072	2.45186e-176	5	THY1
COL3A12	1.14424e-170	0.823732	0.612	0.299	1.8881e-166	5	COL3A1
COL1A21	1.20082e-169	0.83825	0.707	0.408	1.98147e-165	5	COL1A2
IGF22	2.71774e-168	0.492663	0.993	0.803	4.48454e-164	5	IGF2
COL6A23	1.79998e-151	0.632337	0.762	0.445	2.97015e-147	5	COL6A2
ANXA2	2.2058e-148	0.820781	0.498	0.228	3.63979e-144	5	ANXA2
S100A4	3.56429e-138	0.998685	0.293	0.094	5.88143e-134	5	S100A4
C1R2	5.81856e-130	0.785119	0.534	0.267	9.60121e-126	5	C1R
PLAC92	1.13499e-129	0.768523	0.586	0.315	1.87285e-125	5	PLAC9
CPE	2.09748e-129	0.80495	0.476	0.223	3.46104e-125	5	CPE
GSN	8.15952e-126	0.872438	0.427	0.189	1.3464e-121	5	GSN
RNASE42	3.20402e-122	0.686729	0.539	0.28	5.28695e-118	5	RNASE4
DHRS23	5.4495e-122	0.730982	0.45	0.201	8.99221e-118	5	DHRS2
TIMP11	7.0893e-122	0.631428	0.928	0.817	1.16981e-117	5	TIMP1
HIPK11	4.72334e-121	0.738246	0.408	0.173	7.79399e-117	5	HIPK1
LTBP43	2.02516e-118	0.634826	0.608	0.331	3.34172e-114	5	LTBP4
C1S3	5.36323e-113	0.665445	0.599	0.334	8.84987e-109	5	C1S
NTRK22	1.45575e-110	0.588073	0.411	0.175	2.40213e-106	5	NTRK2
PPAP2B2	1.13142e-106	0.671017	0.604	0.354	1.86696e-102	5	PPAP2B
APOE2	1.79751e-104	0.402427	0.974	0.89	2.96607e-100	5	APOE
LHFPL6	8.12302e-103	0.669602	0.383	0.169	1.34038e-98	5	LHFPL6
FXYD12	6.71079e-102	0.571634	0.549	0.29	1.10735e-97	5	FXYD1
PCOLCE	9.95181e-101	0.703251	0.287	0.107	1.64215e-96	5	PCOLCE
POSTN	1.19983e-100	0.867948	0.291	0.111	1.97984e-96	5	POSTN
DPT2	2.07804e-100	0.657477	0.567	0.323	3.42898e-96	5	DPT
HSPB6	6.16979e-89	0.589058	0.311	0.129	1.01808e-84	5	HSPB6
C72	2.05806e-88	0.455605	0.743	0.477	3.39601e-84	5	C7
AEBP1	3.65947e-88	0.658285	0.276	0.109	6.03848e-84	5	AEBP1
S100A10	1.22709e-82	0.561796	0.577	0.357	2.02482e-78	5	S100A10
ENSMMUG000000044411	1.41766e-80	0.538271	0.51	0.294	2.33929e-76	5	ENSMMUG00000004441
TCF212	6.60904e-78	0.570426	0.396	0.196	1.09056e-73	5	TCF21
EMP32	3.68293e-76	0.48252	0.642	0.43	6.0772e-72	5	EMP3
CTSC2	1.94187e-72	0.597336	0.388	0.203	3.20428e-68	5	CTSC
SFRP12	6.25407e-72	0.536348	0.453	0.25	1.03198e-67	5	SFRP1
ENSMMUG000000322312	7.65095e-71	0.608575	0.454	0.26	1.26248e-66	5	ENSMMUG00000032231
SERPING11	3.35199e-69	0.592001	0.452	0.264	5.53112e-65	5	SERPING1
MFAP42	3.46481e-68	0.421675	0.571	0.341	5.71729e-64	5	MFAP4
FSTL12	1.07407e-67	0.521649	0.443	0.248	1.77232e-63	5	FSTL1
FBLN1	2.57155e-67	0.589115	0.27	0.119	4.24332e-63	5	FBLN1
SRPX2	4.70025e-66	0.572268	0.383	0.202	7.75588e-62	5	SRPX
ENSMMUG000000132572	1.93798e-65	0.510831	0.514	0.314	3.19786e-61	5	ENSMMUG00000013257
ENSMMUG000000619591	2.85038e-65	0.429452	0.743	0.583	4.70341e-61	5	ENSMMUG00000061959
TGFBR32	2.64846e-61	0.449469	0.486	0.289	4.37022e-57	5	TGFBR3
CYBRD1	1.57839e-59	0.497396	0.265	0.121	2.6045e-55	5	CYBRD1
MEST2	1.70456e-59	0.544354	0.475	0.296	2.8127e-55	5	MEST
SOD31	3.03809e-55	0.628193	0.364	0.213	5.01316e-51	5	SOD3
CD81	7.66716e-55	0.268022	0.9	0.795	1.26516e-50	5	CD81
CALD11	1.03531e-53	0.358875	0.641	0.446	1.70836e-49	5	CALD1
CD34	5.15757e-53	0.365647	0.295	0.143	8.5105e-49	5	CD34
CAVIN2	1.09124e-51	0.478079	0.258	0.123	1.80066e-47	5	CAVIN2
FXYD61	1.71368e-48	0.344616	0.745	0.616	2.82774e-44	5	FXYD6
HTRA31	2.36124e-48	0.443314	0.434	0.266	3.89629e-44	5	HTRA3
ABCA8	7.04338e-48	0.53159	0.338	0.192	1.16223e-43	5	ABCA8
SELENOM	2.54551e-46	0.471722	0.446	0.291	4.20035e-42	5	SELENOM
MFAP22	2.62705e-46	0.407139	0.314	0.168	4.33489e-42	5	MFAP2
FHL1	2.63219e-46	0.501323	0.331	0.191	4.34337e-42	5	FHL1
ITM2A	5.81249e-46	0.441375	0.255	0.127	9.59118e-42	5	ITM2A
ENSMMUG00000018687	3.55439e-44	0.282387	0.816	0.722	5.8651e-40	5	ENSMMUG00000018687
DDAH2	6.31235e-44	0.423728	0.405	0.256	1.0416e-39	5	DDAH2
TIMP3	1.6849e-41	0.409205	0.275	0.146	2.78025e-37	5	TIMP3
MMP22	3.91716e-37	0.293695	0.605	0.436	6.46371e-33	5	MMP2
PTRF	2.10631e-33	0.363951	0.475	0.341	3.47562e-29	5	PTRF
EPHX12	6.77597e-32	0.385059	0.346	0.22	1.1181e-27	5	EPHX1
SERPINH12	4.48627e-30	0.346371	0.44	0.313	7.40279e-26	5	SERPINH1
HTRA13	5.65384e-30	0.337462	0.444	0.31	9.3294e-26	5	HTRA1
ENSMMUG000000122731	1.67959e-28	0.270758	0.66	0.543	2.77149e-24	5	ENSMMUG00000012273
DLK11	1.86748e-28	0.46134	0.453	0.335	3.08152e-24	5	DLK1
LITAF	3.91013e-27	0.340189	0.268	0.163	6.45211e-23	5	LITAF
GLUL1	6.33944e-26	0.320511	0.413	0.295	1.04607e-21	5	GLUL
ARL6IP5	1.8359e-25	0.337271	0.327	0.219	3.02941e-21	5	ARL6IP5
PDLIM31	1.24334e-24	0.326442	0.35	0.241	2.05164e-20	5	PDLIM3
RAMP22	2.84984e-24	0.267019	0.344	0.224	4.70251e-20	5	RAMP2
APOD	1.29291e-23	0.33389	0.303	0.199	2.13343e-19	5	APOD
HNMT	3.95898e-23	0.291844	0.281	0.18	6.53271e-19	5	HNMT
MMP23B	9.16137e-22	0.28738	0.394	0.281	1.51172e-17	5	MMP23B
ANXA5	1.0088e-21	0.288792	0.472	0.368	1.66462e-17	5	ANXA5
NOVA13	1.01075e-19	0.305028	0.333	0.234	1.66785e-15	5	NOVA1
MXRA8	1.50425e-19	0.288981	0.373	0.272	2.48216e-15	5	MXRA8
TSC22D32	3.87911e-18	0.268364	0.56	0.466	6.40092e-14	5	TSC22D3
NID11	4.28741e-18	0.279363	0.27	0.181	7.07466e-14	5	NID1
TPD52L11	8.17918e-15	0.273314	0.264	0.187	1.34965e-10	5	TPD52L1
C15H9orf152	1.90536e-13	0.2512	0.457	0.387	3.14404e-09	5	C15H9orf152
AKR1C11	2.73276e-13	0.322558	0.297	0.229	4.50932e-09	5	AKR1C1
SRI	2.97191e-12	0.259641	0.26	0.194	4.90395e-08	5	SRI
AMH2	0	1.85223	1	0.459	0	6	AMH
INHA2	0	1.62553	0.964	0.372	0	6	INHA
CLU2	0	1.60047	0.997	0.536	0	6	CLU
SERPINA52	0	1.40505	0.8	0.242	0	6	SERPINA5
APOA12	0	1.36601	0.854	0.321	0	6	APOA1
TF2	0	1.24856	0.609	0.161	0	6	TF
PLA2G1B2	0	1.234	0.824	0.358	0	6	PLA2G1B
IFI62	0	1.17938	0.838	0.413	0	6	IFI6
GAS62	0	1.17582	0.853	0.386	0	6	GAS6
ENSMMUG000000164902	0	1.13321	0.789	0.322	0	6	ENSMMUG00000016490
PMEL2	6.08402e-308	1.16633	0.483	0.12	1.00392e-303	6	PMEL
ENSMMUG000000535392	2.42931e-291	1.14563	0.685	0.254	4.00861e-287	6	ENSMMUG00000053539
BCAM2	9.35452e-290	1.13319	0.663	0.237	1.54359e-285	6	BCAM
ITM2B1	9.985e-289	0.685472	0.989	0.907	1.64763e-284	6	ITM2B
ENO12	1.84707e-283	1.01245	0.857	0.461	3.04785e-279	6	ENO1
C4orf482	2.26135e-281	1.08647	0.676	0.247	3.73145e-277	6	C4orf48
GATM2	3.42233e-274	1.10315	0.677	0.249	5.64719e-270	6	GATM
UBB2	3.64678e-267	0.697427	0.973	0.878	6.01756e-263	6	UBB
ZFAND62	2.50993e-258	0.99042	0.774	0.37	4.14163e-254	6	ZFAND6
LAPTM4B2	2.18977e-254	0.997019	0.721	0.309	3.61333e-250	6	LAPTM4B
HPRT12	1.12318e-253	1.03576	0.675	0.268	1.85335e-249	6	HPRT1
SCG52	1.05743e-245	1.05662	0.522	0.161	1.74487e-241	6	SCG5
BEX12	2.55841e-243	0.941071	0.828	0.454	4.22164e-239	6	BEX1
COPE2	1.20288e-228	0.929394	0.769	0.386	1.98487e-224	6	COPE
WFDC22	2.55356e-226	0.994197	0.441	0.124	4.21363e-222	6	WFDC2
CST32	3.04934e-225	0.72254	0.926	0.687	5.03171e-221	6	CST3
LAPTM4A1	3.73479e-225	0.739607	0.955	0.794	6.16278e-221	6	LAPTM4A
RPL281	7.9087e-224	0.509979	0.976	0.958	1.30501e-219	6	RPL28
ISYNA12	8.51148e-213	0.979652	0.666	0.283	1.40448e-208	6	ISYNA1
REEP62	1.99583e-206	0.958552	0.542	0.192	3.29331e-202	6	REEP6
CITED12	2.34677e-200	1.05378	0.618	0.257	3.8724e-196	6	CITED1
PLAAT32	7.1919e-200	0.877088	0.655	0.284	1.18674e-195	6	PLAAT3
GSTA32	1.05644e-198	0.87595	0.614	0.25	1.74323e-194	6	GSTA3
CALR2	9.13314e-194	0.871976	0.863	0.597	1.50706e-189	6	CALR
RPL31	1.14703e-189	0.416951	0.993	0.968	1.89272e-185	6	RPL3
SERPINF12	1.17707e-189	0.932269	0.745	0.388	1.94228e-185	6	SERPINF1
PRDX62	5.11864e-186	0.792849	0.81	0.52	8.44627e-182	6	PRDX6
FABP32	2.83781e-184	0.915845	0.497	0.178	4.68267e-180	6	FABP3
ENSMMUG000000533202	1.61047e-180	0.925866	0.464	0.156	2.65744e-176	6	ENSMMUG00000053320
IFI272	8.26455e-180	0.684549	0.905	0.666	1.36373e-175	6	IFI27
EIF4EBP12	9.27581e-180	0.88075	0.614	0.264	1.5306e-175	6	EIF4EBP1
SPARC2	1.88331e-179	0.637324	0.952	0.757	3.10765e-175	6	SPARC
PSAP1	2.11178e-179	0.838754	0.862	0.577	3.48465e-175	6	PSAP
ALDH1A12	5.50186e-177	0.952082	0.614	0.28	9.07862e-173	6	ALDH1A1
CTSV2	2.6875e-175	1.21158	0.459	0.164	4.43465e-171	6	CTSV
ENSMMUG000000627922	9.23774e-163	0.804793	0.378	0.116	1.52432e-158	6	ENSMMUG00000062792
GRN2	1.03215e-158	0.972283	0.431	0.154	1.70316e-154	6	GRN
ENSMMUG000000602872	7.1533e-145	0.757041	0.728	0.417	1.18037e-140	6	ENSMMUG00000060287
ATP1B12	6.01658e-143	0.787155	0.636	0.312	9.92796e-139	6	ATP1B1
GMPR2	4.74745e-142	0.865488	0.493	0.207	7.83377e-138	6	GMPR
MARCKSL12	4.59765e-141	0.820114	0.666	0.369	7.58659e-137	6	MARCKSL1
DYNLL12	1.03608e-140	0.726465	0.763	0.488	1.70963e-136	6	DYNLL1
PDLIM42	3.12586e-140	0.818476	0.464	0.183	5.15798e-136	6	PDLIM4
PTGDS2	9.69729e-140	0.879704	0.405	0.147	1.60015e-135	6	PTGDS
RPS151	9.39207e-139	0.441445	0.971	0.973	1.54979e-134	6	RPS15
TTYH11	3.52436e-138	0.841062	0.316	0.096	5.81555e-134	6	TTYH1
ADH52	4.29262e-138	0.789322	0.661	0.357	7.08325e-134	6	ADH5
HMGN52	1.2454e-137	0.788623	0.585	0.273	2.05504e-133	6	HMGN5
LGALS3BP1	3.03291e-134	0.839517	0.435	0.168	5.0046e-130	6	LGALS3BP
HPCAL12	3.12146e-133	0.788849	0.484	0.204	5.15072e-129	6	HPCAL1
ENSMMUG000000549762	1.33287e-132	0.877489	0.507	0.226	2.19937e-128	6	ENSMMUG00000054976
PRDX12	3.02859e-132	0.722194	0.697	0.412	4.99748e-128	6	PRDX1
DCXR2	8.17562e-132	0.821931	0.549	0.261	1.34906e-127	6	DCXR
DDOST2	9.13441e-131	0.740165	0.76	0.49	1.50727e-126	6	DDOST
NUDT112	1.82408e-128	0.806259	0.378	0.135	3.00991e-124	6	NUDT11
FTH1.11	9.14888e-125	0.420171	0.947	0.86	1.50966e-120	6	FTH1.1
ENSMMUG000000015221	1.27106e-124	0.79269	0.294	0.091	2.09738e-120	6	ENSMMUG00000001522
MYL12A1	1.30508e-120	0.532933	0.871	0.708	2.15352e-116	6	MYL12A
IGFBP21	4.61437e-120	0.657146	0.501	0.222	7.61416e-116	6	IGFBP2
CTSD2	3.5318e-118	0.765511	0.597	0.316	5.82783e-114	6	CTSD
SPOCK21	3.11422e-113	0.782123	0.295	0.097	5.13878e-109	6	SPOCK2
SKP11	2.256e-110	0.535289	0.838	0.682	3.72263e-106	6	SKP1
RAC32	3.83343e-110	0.716186	0.351	0.13	6.32555e-106	6	RAC3
SMS2	4.06069e-105	0.713995	0.53	0.264	6.70055e-101	6	SMS
JAM22	1.68181e-101	0.769688	0.357	0.141	2.77516e-97	6	JAM2
CST9L1	4.23556e-101	0.919826	0.279	0.094	6.9891e-97	6	CST9L
TSPO2	6.41503e-101	0.662164	0.589	0.318	1.05854e-96	6	TSPO
MGST32	1.66346e-100	0.591768	0.737	0.519	2.74488e-96	6	MGST3
TMPRSS91	5.39125e-100	0.682521	0.278	0.093	8.89611e-96	6	TMPRSS9
PDIA62	2.29476e-99	0.7532	0.549	0.292	3.78659e-95	6	PDIA6
SPINT22	4.91152e-99	0.680915	0.594	0.336	8.1045e-95	6	SPINT2
ATP5F1E2	4.88681e-97	0.520153	0.804	0.657	8.06372e-93	6	ATP5F1E
CYB5A2	7.62396e-96	0.66621	0.468	0.223	1.25803e-91	6	CYB5A
ENSMMUG000000555841	1.51621e-95	0.422255	0.902	0.801	2.50189e-91	6	ENSMMUG00000055584
SLC39A42	6.69968e-95	0.695786	0.405	0.178	1.10551e-90	6	SLC39A4
MT32	7.31218e-94	0.647974	0.278	0.096	1.20658e-89	6	MT3
PYCARD2	1.46509e-90	0.665475	0.341	0.138	2.41754e-86	6	PYCARD
OMA11	2.48643e-90	0.889143	0.282	0.102	4.10286e-86	6	OMA1
MBOAT72	2.49195e-89	0.755577	0.356	0.151	4.11197e-85	6	MBOAT7
HMGN42	3.93012e-89	0.722113	0.433	0.207	6.48509e-85	6	HMGN4
PTOV12	3.87316e-88	0.662726	0.624	0.377	6.39111e-84	6	PTOV1
TCEAL92	3.96405e-87	0.566275	0.749	0.551	6.54108e-83	6	TCEAL9
ENSMMUG000000174661	6.92877e-87	0.478785	0.81	0.643	1.14332e-82	6	ENSMMUG00000017466
ARPC22	9.00722e-87	0.641629	0.558	0.315	1.48628e-82	6	ARPC2
TUBA1A2	3.14026e-86	0.438741	0.894	0.738	5.18174e-82	6	TUBA1A
RPLP21	7.47751e-86	0.264702	0.983	0.981	1.23386e-81	6	RPLP2
PIGT1	4.43885e-85	0.755304	0.298	0.116	7.32455e-81	6	PIGT
ENSMMUG000000304082	5.08964e-85	0.592735	0.633	0.403	8.39841e-81	6	ENSMMUG00000030408
AGA2	2.94692e-82	0.660308	0.385	0.174	4.86272e-78	6	AGA
MAMU-A1	4.11532e-80	0.655354	0.559	0.321	6.79069e-76	6	MAMU-A
TSTA32	9.14292e-80	0.599819	0.414	0.195	1.50867e-75	6	TSTA3
ACAD102	3.14646e-79	0.659324	0.561	0.331	5.19198e-75	6	ACAD10
TNNT12	3.78984e-79	0.619128	0.53	0.296	6.25362e-75	6	TNNT1
TCEA32	4.2623e-78	0.581608	0.522	0.281	7.03322e-74	6	TCEA3
MYL62	2.61053e-77	0.410942	0.858	0.746	4.30763e-73	6	MYL6
ALDOA1	2.70671e-77	0.575806	0.675	0.463	4.46634e-73	6	ALDOA
SERPINB62	3.27502e-77	0.689782	0.374	0.173	5.40411e-73	6	SERPINB6
TOMM71	3.60321e-77	0.380947	0.876	0.815	5.94565e-73	6	TOMM7
ADGRG11	2.92224e-74	0.614579	0.31	0.129	4.82199e-70	6	ADGRG1
FKBP22	9.50801e-72	0.605098	0.603	0.387	1.56892e-67	6	FKBP2
OAZ12	1.15378e-71	0.629986	0.495	0.281	1.90385e-67	6	OAZ1
TECR2	1.44701e-71	0.620658	0.451	0.238	2.3877e-67	6	TECR
ENSMMUG000000187402	2.53354e-71	0.628335	0.587	0.368	4.1806e-67	6	ENSMMUG00000018740
ENSMMUG000000491542	3.46233e-71	0.587397	0.597	0.384	5.71319e-67	6	ENSMMUG00000049154
LAMP1	2.26106e-70	0.625139	0.521	0.305	3.73098e-66	6	LAMP1
STMN12	2.65388e-70	0.570184	0.632	0.42	4.37916e-66	6	STMN1
TCEAL52	2.72178e-70	0.664351	0.356	0.164	4.49121e-66	6	TCEAL5
ENSMMUG000000319112	5.33738e-70	0.598928	0.262	0.103	8.80721e-66	6	ENSMMUG00000031911
A4GALT1	5.43753e-70	0.700889	0.253	0.098	8.97246e-66	6	A4GALT
CFL11	8.4642e-70	0.486275	0.735	0.54	1.39668e-65	6	CFL1
GSTM32	4.68259e-69	0.56442	0.757	0.583	7.72673e-65	6	GSTM3
BUD232	9.19953e-68	0.531706	0.47	0.256	1.51801e-63	6	BUD23
GUSB1	7.55059e-67	0.67215	0.271	0.112	1.24592e-62	6	GUSB
MMD1	1.57248e-66	0.534956	0.251	0.097	2.59475e-62	6	MMD
FDXR2	8.82676e-66	0.611063	0.415	0.215	1.4565e-61	6	FDXR
ATP5C11	9.93432e-66	0.552205	0.595	0.386	1.63926e-61	6	ATP5C1
TMEM591	4.25329e-65	0.505105	0.74	0.567	7.01836e-61	6	TMEM59
ENSMMUG000000121401	3.61902e-64	0.272335	0.955	0.934	5.97174e-60	6	ENSMMUG00000012140
GTF2H52	9.3937e-64	0.597703	0.415	0.22	1.55005e-59	6	GTF2H5
CTNNAL12	1.97156e-63	0.558753	0.44	0.231	3.25327e-59	6	CTNNAL1
TM7SF21	2.67488e-63	0.624135	0.252	0.103	4.41381e-59	6	TM7SF2
GAMT2	5.33988e-63	0.583583	0.388	0.196	8.81133e-59	6	GAMT
RPN21	1.69056e-62	0.63554	0.397	0.209	2.7896e-58	6	RPN2
ENSMMUG000000224282	3.03864e-62	0.54058	0.558	0.352	5.01407e-58	6	ENSMMUG00000022428
ACTB1	3.52664e-62	0.289787	0.972	0.9	5.81931e-58	6	ACTB
ATP5F1A2	5.15085e-61	0.531097	0.658	0.459	8.49943e-57	6	ATP5F1A
SNRPN2	1.16611e-60	0.621887	0.476	0.281	1.9242e-56	6	SNRPN
SARS2	1.85263e-58	0.569044	0.473	0.277	3.05703e-54	6	SARS
PPIB	3.461e-57	0.420221	0.784	0.649	5.711e-53	6	PPIB
FLYWCH22	6.54705e-57	0.592268	0.337	0.169	1.08033e-52	6	FLYWCH2
SSR41	1.59763e-55	0.50866	0.602	0.417	2.63625e-51	6	SSR4
RPS111	3.81025e-55	0.329072	0.89	0.826	6.28729e-51	6	RPS11
CHCHD10	3.86055e-55	0.532572	0.251	0.108	6.37029e-51	6	CHCHD10
SOX92	1.69667e-54	0.469646	0.342	0.165	2.79967e-50	6	SOX9
MED252	1.22295e-53	0.567595	0.349	0.181	2.01798e-49	6	MED25
ENSMMUG000000451232	6.67269e-53	0.41616	0.731	0.577	1.10106e-48	6	ENSMMUG00000045123
C3H7orf502	1.05314e-52	0.483305	0.551	0.359	1.73779e-48	6	C3H7orf50
CALM32	1.20987e-52	0.521822	0.477	0.294	1.99641e-48	6	CALM3
TMED31	3.85523e-52	0.517382	0.42	0.238	6.36152e-48	6	TMED3
MGST22	5.55344e-52	0.517201	0.309	0.152	9.16374e-48	6	MGST2
PHGDH1	1.20548e-51	0.564757	0.289	0.137	1.98916e-47	6	PHGDH
C16H17orf491	1.60811e-51	0.45173	0.672	0.516	2.65354e-47	6	C16H17orf49
ENSMMUG000000563541	1.28768e-50	0.366576	0.818	0.726	2.12479e-46	6	ENSMMUG00000056354
GSTP11	3.69882e-50	0.385951	0.774	0.632	6.10343e-46	6	GSTP1
NECTIN21	5.3315e-50	0.57858	0.289	0.14	8.7975e-46	6	NECTIN2
TSEN342	3.63633e-49	0.545877	0.391	0.221	6.00031e-45	6	TSEN34
NDUFB51	3.69478e-49	0.488645	0.483	0.302	6.09676e-45	6	NDUFB5
CXXC52	6.98083e-49	0.505961	0.31	0.153	1.15191e-44	6	CXXC5
JPT11	1.78162e-48	0.312015	0.861	0.784	2.93986e-44	6	JPT1
CHID11	2.59791e-48	0.575873	0.308	0.158	4.28681e-44	6	CHID1
TMEM1232	6.69201e-48	0.557438	0.41	0.24	1.10425e-43	6	TMEM123
ATP5PF1	1.46057e-47	0.395767	0.705	0.546	2.41008e-43	6	ATP5PF
NDUFS82	1.63512e-47	0.516283	0.435	0.263	2.69811e-43	6	NDUFS8
UNC1192	2.40978e-47	0.544762	0.298	0.15	3.97637e-43	6	UNC119
APMAP1	9.25663e-47	0.60806	0.289	0.144	1.52744e-42	6	APMAP
HNRNPH21	1.13597e-46	0.310403	0.842	0.772	1.87447e-42	6	HNRNPH2
GLRX51	2.58855e-46	0.567821	0.294	0.15	4.27137e-42	6	GLRX5
EPN12	1.80344e-45	0.599406	0.359	0.202	2.97585e-41	6	EPN1
SOD11	2.2471e-45	0.37741	0.719	0.58	3.70794e-41	6	SOD1
ATP5F1B1	1.01301e-43	0.540509	0.461	0.293	1.67156e-39	6	ATP5F1B
RBBP72	1.4773e-43	0.507821	0.541	0.368	2.4377e-39	6	RBBP7
ARPC1B1	4.74167e-43	0.473626	0.498	0.326	7.82423e-39	6	ARPC1B
SLC39A31	6.47044e-43	0.482621	0.267	0.13	1.06769e-38	6	SLC39A3
UBL51	1.25906e-42	0.434915	0.573	0.402	2.07758e-38	6	UBL5
SH3BP51	1.29022e-42	0.537068	0.27	0.135	2.12898e-38	6	SH3BP5
CHPF1	1.69978e-42	0.596971	0.26	0.129	2.8048e-38	6	CHPF
TMEM2581	3.43372e-41	0.447428	0.599	0.444	5.66599e-37	6	TMEM258
IFI27L21	4.22604e-41	0.336928	0.828	0.755	6.97338e-37	6	IFI27L2
COX7B2	1.30334e-40	0.409555	0.651	0.515	2.15064e-36	6	COX7B
NDUFB21	1.40232e-40	0.388226	0.61	0.446	2.31397e-36	6	NDUFB2
ERGIC31	2.03559e-40	0.445456	0.555	0.388	3.35893e-36	6	ERGIC3
CD3201	3.34933e-40	0.388569	0.43	0.26	5.52673e-36	6	CD320
MYL6B2	5.18782e-40	0.517491	0.362	0.211	8.56042e-36	6	MYL6B
RPL31.11	9.07558e-40	0.30901	0.88	0.908	1.49756e-35	6	RPL31.1
RTRAF1	1.3488e-39	0.414762	0.566	0.4	2.22566e-35	6	RTRAF
PPDPF1	1.83162e-39	0.408329	0.582	0.414	3.02236e-35	6	PPDPF
GPX42	9.13361e-39	0.475271	0.284	0.151	1.50714e-34	6	GPX4
ATOX11	2.76669e-38	0.464273	0.397	0.245	4.56532e-34	6	ATOX1
GYG12	2.66931e-37	0.585351	0.374	0.233	4.40463e-33	6	GYG1
ZYX2	3.20853e-37	0.533805	0.301	0.166	5.2944e-33	6	ZYX
LRPAP1	1.29908e-36	0.477299	0.443	0.291	2.14361e-32	6	LRPAP1
ENSMMUG000000474812	4.37198e-36	0.422868	0.505	0.349	7.21421e-32	6	ENSMMUG00000047481
DMAC12	8.84794e-36	0.435704	0.43	0.275	1.46e-31	6	DMAC1
HEXA1	1.54955e-35	0.462669	0.258	0.135	2.55691e-31	6	HEXA
ATP5MC21	4.77917e-34	0.320479	0.741	0.636	7.88611e-30	6	ATP5MC2
ENSMMUG000000016451	1.06743e-33	0.309704	0.754	0.648	1.76137e-29	6	ENSMMUG00000001645
PUF602	1.83889e-33	0.43811	0.442	0.29	3.03435e-29	6	PUF60
ISOC22	3.77797e-33	0.468546	0.277	0.153	6.23403e-29	6	ISOC2
ETFB2	4.50632e-33	0.428963	0.452	0.305	7.43589e-29	6	ETFB
SCP21	4.84677e-33	0.434473	0.432	0.285	7.99766e-29	6	SCP2
HINT22	7.11897e-33	0.399944	0.36	0.219	1.1747e-28	6	HINT2
PSMB61	1.2781e-32	0.442156	0.387	0.245	2.10899e-28	6	PSMB6
GET3	7.89329e-32	0.451608	0.275	0.153	1.30247e-27	6	GET3
CKB1	1.87752e-31	0.434416	0.453	0.306	3.0981e-27	6	CKB
PAIP21	1.96456e-31	0.428428	0.507	0.363	3.24172e-27	6	PAIP2
PDIA4	3.9897e-31	0.49737	0.302	0.178	6.5834e-27	6	PDIA4
MDH11	5.79179e-31	0.412925	0.504	0.359	9.55704e-27	6	MDH1
COX5B1	8.79174e-31	0.327435	0.654	0.515	1.45073e-26	6	COX5B
COX8A1	2.14576e-30	0.389615	0.396	0.254	3.54071e-26	6	COX8A
LSM71	5.85989e-30	0.426804	0.393	0.259	9.6694e-26	6	LSM7
ARF41	8.3442e-30	0.407151	0.526	0.385	1.37688e-25	6	ARF4
CCDC692	1.2388e-29	0.403712	0.258	0.143	2.04414e-25	6	CCDC69
DDX242	1.69387e-29	0.329332	0.547	0.389	2.79505e-25	6	DDX24
AP2S11	1.93872e-29	0.408803	0.337	0.205	3.19909e-25	6	AP2S1
ZCCHC17	2.59773e-29	0.44706	0.26	0.147	4.28651e-25	6	ZCCHC17
ANXA62	4.10608e-29	0.469648	0.347	0.221	6.77544e-25	6	ANXA6
ACAA22	4.99842e-29	0.456468	0.299	0.177	8.2479e-25	6	ACAA2
C11H12orf571	7.01039e-29	0.262863	0.776	0.692	1.15679e-24	6	C11H12orf57
ITFG11	2.96455e-28	0.455759	0.308	0.186	4.89181e-24	6	ITFG1
NDUFB111	4.45715e-28	0.374108	0.468	0.334	7.35474e-24	6	NDUFB11
ATP6AP1	7.47718e-28	0.478154	0.301	0.18	1.23381e-23	6	ATP6AP1
MZT2B1	8.02934e-28	0.360812	0.5	0.361	1.32492e-23	6	MZT2B
NDFIP11	1.01016e-27	0.357402	0.578	0.442	1.66686e-23	6	NDFIP1
TRAPPC51	4.035e-27	0.431535	0.353	0.228	6.65815e-23	6	TRAPPC5
GAPDH1	4.23698e-27	0.273915	0.828	0.763	6.99144e-23	6	GAPDH
RNASEH2C1	5.76334e-27	0.363218	0.334	0.209	9.51008e-23	6	RNASEH2C
ATP1A11	6.41949e-27	0.445789	0.257	0.15	1.05928e-22	6	ATP1A1
CDK2AP12	1.43482e-26	0.414694	0.381	0.256	2.3676e-22	6	CDK2AP1
MRPL231	1.64372e-26	0.338613	0.308	0.187	2.71231e-22	6	MRPL23
PGK11	4.23385e-26	0.403238	0.356	0.232	6.98628e-22	6	PGK1
MRPS61	5.15466e-26	0.366082	0.328	0.207	8.5057e-22	6	MRPS6
ERP29.11	5.79518e-26	0.415981	0.347	0.222	9.56262e-22	6	ERP29.1
PRDX51	7.63676e-26	0.340094	0.466	0.33	1.26014e-21	6	PRDX5
ENSMMUG000000611281	1.63318e-25	0.385507	0.353	0.231	2.69491e-21	6	ENSMMUG00000061128
DRAP11	2.02044e-25	0.398994	0.468	0.34	3.33392e-21	6	DRAP1
PPP1CA1	2.25302e-25	0.385859	0.281	0.168	3.71771e-21	6	PPP1CA
ENSMMUG000000445852	2.94077e-25	0.337891	0.629	0.512	4.85256e-21	6	ENSMMUG00000044585
FKBP10	5.21968e-25	0.451423	0.309	0.194	8.613e-21	6	FKBP10
COX4I12	1.0916e-24	0.279404	0.744	0.663	1.80126e-20	6	COX4I1
ATP5MG1	2.90284e-24	0.33384	0.559	0.441	4.78998e-20	6	ATP5MG
MAGED2	4.06354e-24	0.307719	0.738	0.63	6.70525e-20	6	MAGED2
FAM234A1	6.32248e-24	0.472271	0.254	0.153	1.04327e-19	6	FAM234A
PDRG11	8.46143e-24	0.367048	0.319	0.204	1.39622e-19	6	PDRG1
TIMM8B2	1.26406e-23	0.362176	0.423	0.299	2.08583e-19	6	TIMM8B
HIGD2A1	1.5566e-23	0.360158	0.337	0.221	2.56855e-19	6	HIGD2A
NDUFB81	1.97919e-23	0.361764	0.373	0.253	3.26586e-19	6	NDUFB8
TMEM1471	2.06773e-23	0.353584	0.417	0.293	3.41196e-19	6	TMEM147
TMEM219	2.43815e-23	0.35683	0.262	0.159	4.02318e-19	6	TMEM219
BTF3L41	4.15653e-23	0.362888	0.41	0.289	6.8587e-19	6	BTF3L4
HYPK2	4.17036e-23	0.337179	0.409	0.283	6.88151e-19	6	HYPK
MRFAP11	4.75136e-23	0.316018	0.624	0.517	7.84022e-19	6	MRFAP1
ATP5F1D1	5.00404e-23	0.328367	0.545	0.42	8.25716e-19	6	ATP5F1D
C1QBP1	5.5432e-23	0.345823	0.403	0.28	9.14683e-19	6	C1QBP
ST3GAL42	8.54314e-23	0.379594	0.316	0.204	1.4097e-18	6	ST3GAL4
UQCRQ2	1.08288e-22	0.364931	0.333	0.219	1.78685e-18	6	UQCRQ
ENY22	1.69075e-22	0.348259	0.416	0.293	2.7899e-18	6	ENY2
PIN11	2.0002e-22	0.380298	0.311	0.201	3.30054e-18	6	PIN1
PDHB	3.62023e-22	0.357013	0.253	0.152	5.97374e-18	6	PDHB
URGCP2	5.47647e-22	0.366137	0.366	0.25	9.03672e-18	6	URGCP
HMGN32	6.42769e-22	0.266295	0.668	0.559	1.06063e-17	6	HMGN3
CLTA1	6.65618e-22	0.306668	0.635	0.535	1.09834e-17	6	CLTA
BRK11	7.83387e-22	0.290419	0.643	0.554	1.29267e-17	6	BRK1
YJEFN31	9.7839e-22	0.318249	0.541	0.427	1.61444e-17	6	YJEFN3
COX6B11	1.22371e-21	0.338822	0.478	0.355	2.01924e-17	6	COX6B1
TMEM176B1	1.94949e-21	0.400828	0.303	0.197	3.21685e-17	6	TMEM176B
TMEM1602	1.98634e-21	0.377658	0.294	0.191	3.27766e-17	6	TMEM160
SNRPD31	2.88304e-21	0.339641	0.407	0.29	4.75731e-17	6	SNRPD3
POLR2G1	4.44591e-21	0.358186	0.292	0.187	7.3362e-17	6	POLR2G
SAT11	5.03781e-21	0.295516	0.326	0.215	8.31288e-17	6	SAT1
UQCRFS11	6.90806e-21	0.37742	0.367	0.256	1.1399e-16	6	UQCRFS1
UFC11	7.35247e-21	0.334018	0.289	0.184	1.21323e-16	6	UFC1
DPP71	7.71623e-21	0.380778	0.345	0.234	1.27325e-16	6	DPP7
SLC2A111	1.09137e-20	0.29281	0.634	0.536	1.80088e-16	6	SLC2A11
NDUFA22	2.12035e-20	0.301672	0.443	0.322	3.49878e-16	6	NDUFA2
U2AF22	3.95408e-20	0.340168	0.282	0.181	6.52462e-16	6	U2AF2
SSR2	4.01781e-20	0.324146	0.564	0.458	6.62978e-16	6	SSR2
ROMO12	4.13755e-20	0.298096	0.624	0.524	6.82737e-16	6	ROMO1
RPS27L1	5.08398e-20	0.32104	0.522	0.41	8.38908e-16	6	RPS27L
BEX41	5.91527e-20	0.310302	0.51	0.39	9.76078e-16	6	BEX4
NAPA1	6.72925e-20	0.348215	0.337	0.229	1.11039e-15	6	NAPA
COX5A1	9.51847e-20	0.333568	0.317	0.211	1.57064e-15	6	COX5A
COX7A22	1.2776e-19	0.294009	0.539	0.433	2.10817e-15	6	COX7A2
COX191	1.42813e-19	0.310465	0.341	0.231	2.35655e-15	6	COX19
UQCRB1	1.67609e-19	0.319907	0.371	0.26	2.76571e-15	6	UQCRB
RNASET2	2.00464e-19	0.319648	0.397	0.283	3.30786e-15	6	RNASET2
COX172	2.20864e-19	0.293874	0.294	0.19	3.64448e-15	6	COX17
PRDX4	2.53303e-19	0.382677	0.347	0.242	4.17976e-15	6	PRDX4
WDR83OS1	3.136e-19	0.266947	0.671	0.593	5.17471e-15	6	WDR83OS
DNAJB61	3.44601e-19	0.273991	0.41	0.292	5.68626e-15	6	DNAJB6
GTF3C61	4.35614e-19	0.354799	0.261	0.167	7.18806e-15	6	GTF3C6
NUCB1	8.5321e-19	0.382111	0.342	0.237	1.40788e-14	6	NUCB1
RDH51	9.91156e-19	0.302851	0.391	0.28	1.63551e-14	6	RDH5
CYCS1	1.40707e-18	0.350404	0.294	0.196	2.3218e-14	6	CYCS
SLC25A431	1.43125e-18	0.378009	0.311	0.213	2.36171e-14	6	SLC25A43
PFDN21	1.68287e-18	0.318303	0.308	0.206	2.7769e-14	6	PFDN2
SH3BGRL1	2.85318e-18	0.365753	0.404	0.3	4.70803e-14	6	SH3BGRL
HNRNPL1	3.25391e-18	0.348423	0.399	0.29	5.36928e-14	6	HNRNPL
ENSMMUG00000050257	3.6041e-18	0.308306	0.293	0.193	5.94713e-14	6	ENSMMUG00000050257
RBX11	4.05414e-18	0.279544	0.557	0.452	6.68974e-14	6	RBX1
DKK31	5.21875e-18	0.362072	0.294	0.194	8.61147e-14	6	DKK3
HSPA51	5.71649e-18	0.379584	0.41	0.304	9.43277e-14	6	HSPA5
PET1002	6.59987e-18	0.321864	0.303	0.205	1.08904e-13	6	PET100
TRMT1121	7.72222e-18	0.277499	0.585	0.478	1.27424e-13	6	TRMT112
TUFM	8.20745e-18	0.34897	0.322	0.222	1.35431e-13	6	TUFM
SDF41	1.03314e-17	0.402838	0.281	0.189	1.70478e-13	6	SDF4
ARPC31	1.99194e-17	0.274552	0.401	0.291	3.2869e-13	6	ARPC3
MRPL571	3.24219e-17	0.303431	0.267	0.175	5.34994e-13	6	MRPL57
NDUFS61	3.42576e-17	0.280204	0.302	0.203	5.65285e-13	6	NDUFS6
CIAO2B1	4.38776e-17	0.313299	0.29	0.195	7.24025e-13	6	CIAO2B
TMED1	6.0317e-17	0.324671	0.258	0.168	9.9529e-13	6	TMED1
ZFAND52	6.32561e-17	0.357813	0.356	0.253	1.04379e-12	6	ZFAND5
PIN41	7.35193e-17	0.341617	0.284	0.191	1.21314e-12	6	PIN4
MCFD21	8.81614e-17	0.323457	0.262	0.172	1.45475e-12	6	MCFD2
PLD3	9.21925e-17	0.397587	0.456	0.358	1.52127e-12	6	PLD3
NDUFV21	1.31087e-16	0.312586	0.377	0.278	2.16307e-12	6	NDUFV2
ARF51	2.34894e-16	0.30235	0.501	0.403	3.87598e-12	6	ARF5
NDUFS7	2.98211e-16	0.344419	0.252	0.166	4.92078e-12	6	NDUFS7
PARK71	3.85975e-16	0.284071	0.41	0.307	6.36897e-12	6	PARK7
ANAPC111	5.47775e-16	0.330149	0.37	0.273	9.03883e-12	6	ANAPC11
TMED102	9.5434e-16	0.32661	0.325	0.23	1.57476e-11	6	TMED10
COMMD6	1.1393e-15	0.255995	0.562	0.47	1.87996e-11	6	COMMD6
ENSMMUG000000522021	1.2553e-15	0.28401	0.381	0.277	2.07137e-11	6	ENSMMUG00000052202
ANAPC131	2.66802e-15	0.287061	0.376	0.275	4.4025e-11	6	ANAPC13
VKORC1	3.01667e-15	0.320886	0.265	0.178	4.97781e-11	6	VKORC1
EDF11	4.7065e-15	0.279653	0.519	0.426	7.7662e-11	6	EDF1
AKR1C12	5.52819e-15	0.265407	0.325	0.228	9.12207e-11	6	AKR1C1
CLIC11	6.72006e-15	0.268227	0.432	0.328	1.10888e-10	6	CLIC1
AURKAIP11	7.14373e-15	0.335094	0.296	0.209	1.17879e-10	6	AURKAIP1
H2AFY1	7.21889e-15	0.358853	0.273	0.19	1.19119e-10	6	H2AFY
SEC61G1	8.75668e-15	0.26828	0.464	0.373	1.44494e-10	6	SEC61G
BUD311	1.02736e-14	0.292184	0.269	0.184	1.69524e-10	6	BUD31
SYNGR11	1.03738e-14	0.310583	0.284	0.196	1.71178e-10	6	SYNGR1
OSBPL21	1.30436e-14	0.333478	0.32	0.23	2.15232e-10	6	OSBPL2
CCDC561	1.32965e-14	0.266926	0.272	0.185	2.19406e-10	6	CCDC56
ECHS11	1.3522e-14	0.335898	0.269	0.186	2.23126e-10	6	ECHS1
SDCBP1	1.36697e-14	0.320764	0.405	0.315	2.25564e-10	6	SDCBP
SLC25A31	1.52808e-14	0.257689	0.638	0.565	2.52148e-10	6	SLC25A3
VDAC11	1.63527e-14	0.375314	0.273	0.191	2.69836e-10	6	VDAC1
SNRPB1	1.74274e-14	0.29189	0.489	0.39	2.87569e-10	6	SNRPB
ENSMMUG000000512391	2.0669e-14	0.289207	0.539	0.449	3.41059e-10	6	ENSMMUG00000051239
NHP21	2.07651e-14	0.273138	0.292	0.204	3.42645e-10	6	NHP2
PSMA21	2.17399e-14	0.297619	0.406	0.313	3.5873e-10	6	PSMA2
PSMB71	3.29188e-14	0.266791	0.525	0.43	5.43193e-10	6	PSMB7
CD59	3.54782e-14	0.326706	0.405	0.315	5.85426e-10	6	CD59
PCMT11	5.24846e-14	0.341679	0.314	0.228	8.66049e-10	6	PCMT1
PSMB51	9.95176e-14	0.312433	0.323	0.237	1.64214e-09	6	PSMB5
FSCN12	1.06987e-13	0.272434	0.341	0.247	1.7654e-09	6	FSCN1
SLC25A41	1.40551e-13	0.354904	0.287	0.206	2.31922e-09	6	SLC25A4
FNTB2	1.73795e-13	0.325521	0.321	0.236	2.86779e-09	6	FNTB
LSM21	3.19945e-13	0.271017	0.344	0.258	5.27941e-09	6	LSM2
H2AFV1	5.09439e-13	0.268653	0.33	0.242	8.40626e-09	6	H2AFV
MDH21	5.98846e-13	0.309041	0.259	0.181	9.88156e-09	6	MDH2
UBE2I1	7.13651e-13	0.261064	0.44	0.351	1.1776e-08	6	UBE2I
GHITM1	1.02234e-12	0.275493	0.347	0.26	1.68697e-08	6	GHITM
ESD1	1.04413e-12	0.258794	0.321	0.233	1.72291e-08	6	ESD
DECR1	1.75393e-12	0.259152	0.252	0.173	2.89417e-08	6	DECR1
FAM127A	3.51331e-12	0.283684	0.254	0.179	5.79732e-08	6	FAM127A
JTB	4.09123e-12	0.252303	0.265	0.188	6.75094e-08	6	JTB
BZW11	5.36237e-12	0.291315	0.323	0.244	8.84845e-08	6	BZW1
NDUFAB11	6.30455e-12	0.27699	0.292	0.212	1.04031e-07	6	NDUFAB1
PYURF1	6.38211e-12	0.27132	0.374	0.287	1.05311e-07	6	PYURF
BTG32	8.06056e-12	0.277963	0.33	0.246	1.33007e-07	6	BTG3
TBCB	9.59038e-12	0.290107	0.28	0.206	1.58251e-07	6	TBCB
NDUFA62	1.54933e-11	0.262918	0.351	0.268	2.55655e-07	6	NDUFA6
RNF51	3.84217e-11	0.257287	0.301	0.223	6.33997e-07	6	RNF5
RNF1811	4.16462e-11	0.257219	0.311	0.235	6.87203e-07	6	RNF181
HSPA8	6.10544e-11	0.323872	0.411	0.335	1.00746e-06	6	HSPA8
ENSMMUG000000172311	8.0427e-11	0.253269	0.357	0.275	1.32713e-06	6	ENSMMUG00000017231
ARL2	8.62573e-11	0.2845	0.26	0.189	1.42333e-06	6	ARL2
PRKCSH	1.01139e-10	0.320571	0.252	0.185	1.6689e-06	6	PRKCSH
BEX22	1.70224e-10	0.271344	0.294	0.22	2.80886e-06	6	BEX2
SDHA1	1.9764e-10	0.28944	0.255	0.185	3.26126e-06	6	SDHA
BCAP31	3.43728e-10	0.284199	0.301	0.23	5.67185e-06	6	BCAP31
QDPR1	3.62458e-10	0.286207	0.252	0.184	5.98091e-06	6	QDPR
EIF61	4.72286e-10	0.255483	0.352	0.276	7.79319e-06	6	EIF6
MRPL401	6.32588e-10	0.261557	0.288	0.218	1.04383e-05	6	MRPL40
HSPD11	8.45972e-10	0.258873	0.323	0.249	1.39594e-05	6	HSPD1
UQCRC1	1.5967e-09	0.30844	0.265	0.2	2.63471e-05	6	UQCRC1
NUDC	2.1157e-09	0.254596	0.363	0.288	3.49112e-05	6	NUDC
TIMM10B2	4.75158e-09	0.257584	0.278	0.211	7.84057e-05	6	TIMM10B
P4HB1	9.48276e-09	0.316313	0.4	0.336	0.000156475	6	P4HB
EIF4A1	1.53033e-08	0.260372	0.489	0.432	0.00025252	6	EIF4A1
AP2M1	1.75352e-08	0.264657	0.369	0.299	0.000289348	6	AP2M1
MTCH11	4.32195e-07	0.281306	0.29	0.233	0.00713165	6	MTCH1
IGFBP51	0	1.73122	1	0.599	0	7	IGFBP5
C73	5.35107e-124	0.673863	0.782	0.478	8.82981e-120	7	C7
DCN4	2.88136e-118	0.507004	0.942	0.68	4.75453e-114	7	DCN
COL1A13	5.24622e-96	0.49718	0.807	0.529	8.65679e-92	7	COL1A1
2023-06-01	1.00006e-80	0.422837	0.925	0.765	1.65019e-76	7	JUN
MFAP43	1.56857e-76	0.646326	0.579	0.343	2.5883e-72	7	MFAP4
IGF23	1.68641e-70	0.315966	0.992	0.805	2.78275e-66	7	IGF2
DPT3	1.15459e-64	0.580935	0.538	0.328	1.90519e-60	7	DPT
PMP223	2.67905e-61	0.529229	0.533	0.323	4.4207e-57	7	PMP22
COL6A24	9.59907e-59	0.440486	0.665	0.454	1.58394e-54	7	COL6A2
TXNIP2	7.21902e-53	0.371366	0.756	0.556	1.19121e-48	7	TXNIP
CD811	6.97289e-50	0.337078	0.879	0.797	1.1506e-45	7	CD81
PPAP2B3	8.74846e-48	0.531819	0.538	0.361	1.44358e-43	7	PPAP2B
TGFBR33	3.56703e-46	0.534393	0.459	0.292	5.88595e-42	7	TGFBR3
CALD12	3.97337e-46	0.428617	0.618	0.449	6.55646e-42	7	CALD1
NTRK23	6.64403e-45	0.541742	0.334	0.181	1.09633e-40	7	NTRK2
SPOCK32	3.39021e-44	0.539479	0.349	0.196	5.59418e-40	7	SPOCK3
SFRP13	3.08011e-43	0.516895	0.416	0.254	5.08249e-39	7	SFRP1
TSC22D33	3.6717e-43	0.433313	0.621	0.464	6.05867e-39	7	TSC22D3
LTBP44	7.73742e-42	0.421986	0.512	0.339	1.27675e-37	7	LTBP4
RARRES22	3.3027e-39	0.384114	0.741	0.639	5.44978e-35	7	RARRES2
RNASE43	2.40335e-38	0.489539	0.435	0.288	3.96576e-34	7	RNASE4
COL1A22	2.55663e-37	0.354343	0.574	0.418	4.21869e-33	7	COL1A2
NR2F23	9.51487e-36	0.483081	0.42	0.278	1.57005e-31	7	NR2F2
C1S4	6.3607e-34	0.40506	0.497	0.342	1.04958e-29	7	C1S
COL3A13	7.34183e-33	0.408603	0.454	0.31	1.21148e-28	7	COL3A1
MMP23	5.35624e-32	0.378629	0.577	0.439	8.83833e-28	7	MMP2
HTRA32	2.45064e-30	0.441417	0.403	0.27	4.0438e-26	7	HTRA3
PNISR1	9.827e-30	0.346733	0.656	0.543	1.62155e-25	7	PNISR
IGFBP31	9.0071e-29	0.523246	0.321	0.198	1.48626e-24	7	IGFBP3
EIF4A22	2.23934e-27	0.289983	0.799	0.751	3.69514e-23	7	EIF4A2
NOVA14	2.31926e-26	0.471648	0.349	0.234	3.82701e-22	7	NOVA1
FSTL13	3.30946e-26	0.422414	0.37	0.254	5.46093e-22	7	FSTL1
PTN	9.72942e-26	0.536973	0.274	0.167	1.60545e-21	7	PTN
FXYD13	2.31884e-25	0.344137	0.428	0.299	3.82632e-21	7	FXYD1
CYP1B11	5.24802e-25	0.405711	0.284	0.174	8.65975e-21	7	CYP1B1
VGLL42	3.39566e-24	0.3938	0.438	0.33	5.60318e-20	7	VGLL4
SSPN1	3.92358e-24	0.448674	0.263	0.162	6.4743e-20	7	SSPN
FXYD62	4.98504e-24	0.295776	0.696	0.62	8.22581e-20	7	FXYD6
HTRA14	3.19192e-23	0.387661	0.425	0.313	5.26698e-19	7	HTRA1
PNN	6.88045e-23	0.421229	0.448	0.349	1.13534e-18	7	PNN
RAMP23	1.34526e-22	0.429541	0.335	0.226	2.21981e-18	7	RAMP2
EMP33	1.00587e-19	0.322607	0.533	0.438	1.65978e-15	7	EMP3
SRPX3	3.20931e-19	0.407898	0.304	0.208	5.29568e-15	7	SRPX
ENSMMUG000000647922	5.99788e-19	0.367978	0.477	0.389	9.8971e-15	7	ENSMMUG00000064792
LHFPL61	2.94244e-16	0.365382	0.263	0.178	4.85531e-12	7	LHFPL6
NID12	8.95981e-16	0.396373	0.264	0.182	1.47846e-11	7	NID1
MFAP23	1.40391e-15	0.389034	0.253	0.172	2.31659e-11	7	MFAP2
MEST3	1.47505e-15	0.327429	0.393	0.302	2.43399e-11	7	MEST
ZFP36L12	1.25659e-14	0.252584	0.608	0.533	2.0735e-10	7	ZFP36L1
CPE1	1.42907e-14	0.308694	0.318	0.234	2.35811e-10	7	CPE
ENSMMUG000000132573	4.37233e-14	0.252484	0.411	0.322	7.21478e-10	7	ENSMMUG00000013257
S100A62	1.4344e-13	0.339148	0.475	0.396	2.36691e-09	7	S100A6
C1R3	1.77229e-13	0.316942	0.36	0.279	2.92446e-09	7	C1R
TCF213	3.30746e-13	0.338247	0.283	0.204	5.45764e-09	7	TCF21
EPHX13	3.38226e-13	0.306246	0.302	0.224	5.58106e-09	7	EPHX1
SPCS1	2.10815e-11	0.254262	0.559	0.538	3.47866e-07	7	SPCS1
GLUL2	2.63771e-11	0.319618	0.361	0.299	4.35249e-07	7	GLUL
IGFBP61	2.74468e-10	0.377616	0.356	0.287	4.52899e-06	7	IGFBP6
SEC621	3.63983e-10	0.269317	0.497	0.461	6.00609e-06	7	SEC62
NFIC2	1.60507e-09	0.289977	0.326	0.266	2.64853e-05	7	NFIC
KDELR11	5.16921e-09	0.251393	0.497	0.462	8.52972e-05	7	KDELR1
CTSC3	8.50406e-09	0.275733	0.271	0.211	0.000140325	7	CTSC
SERPINH13	1.50673e-08	0.250194	0.371	0.318	0.000248626	7	SERPINH1
NDN	9.37565e-08	0.259326	0.386	0.346	0.00154708	7	NDN
MXRA81	3.09291e-07	0.289831	0.319	0.276	0.00510361	7	MXRA8
RBFOX2	3.44296e-07	0.28498	0.271	0.224	0.00568122	7	RBFOX2
ENSMMUG000000322313	3.72435e-07	0.263873	0.319	0.269	0.00614555	7	ENSMMUG00000032231
IP6K21	8.40895e-07	0.269068	0.323	0.279	0.0138756	7	IP6K2
NFIA1	9.44519e-07	0.320838	0.32	0.283	0.0155855	7	NFIA
SNRNP70	9.0858e-05	0.268484	0.304	0.279	1	7	SNRNP70
ZFP361	0	2.33364	1	0.294	0	8	ZFP36
FOS1	2.95838e-250	0.926137	0.986	0.685	4.88162e-246	8	FOS
2023-06-02	3.9435e-215	0.739512	0.998	0.764	6.50716e-211	8	JUN
SOCS31	5.26709e-136	0.80025	0.514	0.195	8.69122e-132	8	SOCS3
DCN5	4.45709e-105	0.507074	0.956	0.681	7.35465e-101	8	DCN
FOSB2	3.31144e-91	0.687648	0.618	0.331	5.4642e-87	8	FOSB
IGF24	3.52234e-89	0.416041	0.997	0.806	5.81221e-85	8	IGF2
NR4A11	1.65347e-77	0.966524	0.344	0.142	2.72838e-73	8	NR4A1
C74	2.83243e-61	0.415965	0.761	0.482	4.67379e-57	8	C7
C1S5	5.72635e-55	0.437454	0.588	0.34	9.44906e-51	8	C1S
BTG2	3.67103e-54	0.774477	0.282	0.124	6.05757e-50	8	BTG2
APOE3	8.75845e-53	0.268039	0.983	0.891	1.44523e-48	8	APOE
SERPINE23	2.39018e-50	0.496799	0.661	0.452	3.94404e-46	8	SERPINE2
PPAP2B4	2.24015e-43	0.423124	0.568	0.361	3.69647e-39	8	PPAP2B
C1R4	6.06104e-43	0.428903	0.475	0.275	1.00013e-38	8	C1R
IGFBP52	2.77629e-41	0.297877	0.82	0.61	4.58115e-37	8	IGFBP5
GADD45B1	4.46865e-41	0.476552	0.386	0.215	7.37372e-37	8	GADD45B
MMP24	5.91877e-40	0.386803	0.63	0.438	9.76656e-36	8	MMP2
ENSMMUG000000132574	1.65817e-39	0.417227	0.516	0.318	2.73615e-35	8	ENSMMUG00000013257
COL6A25	1.62343e-38	0.327344	0.677	0.455	2.67882e-34	8	COL6A2
ENSMMUG000000491511	5.58676e-37	0.296203	0.892	0.796	9.21871e-33	8	ENSMMUG00000049151
PMP224	1.25162e-36	0.35909	0.523	0.325	2.0653e-32	8	PMP22
ENSMMUG000000023201	1.64181e-36	0.271389	0.944	0.871	2.70915e-32	8	ENSMMUG00000002320
BTG11	1.7333e-35	0.355854	0.763	0.598	2.86012e-31	8	BTG1
FXYD14	4.61398e-33	0.354789	0.484	0.298	7.61353e-29	8	FXYD1
NDRG22	5.31312e-33	0.332731	0.476	0.289	8.76718e-29	8	NDRG2
DUSP12	9.27778e-33	0.479988	0.483	0.318	1.53093e-28	8	DUSP1
ADAMTS1	3.41922e-32	0.478384	0.265	0.134	5.64206e-28	8	ADAMTS1
S100A63	4.1608e-31	0.3516	0.571	0.392	6.86573e-27	8	S100A6
TXNIP3	1.51566e-30	0.314552	0.734	0.558	2.50099e-26	8	TXNIP
IGFBP32	5.285e-28	0.277697	0.348	0.198	8.72079e-24	8	IGFBP3
HIST1H2AC1	7.62031e-28	0.502166	0.298	0.17	1.25743e-23	8	HIST1H2AC
MGP2	1.19546e-27	0.280252	0.474	0.306	1.97263e-23	8	MGP
SPOCK33	1.26987e-27	0.3449	0.342	0.198	2.09541e-23	8	SPOCK3
SRPX4	5.58251e-27	0.341326	0.351	0.207	9.2117e-23	8	SRPX
HTRA15	1.24339e-26	0.35268	0.473	0.311	2.05171e-22	8	HTRA1
HSPB11	3.29419e-26	0.453507	0.44	0.297	5.43574e-22	8	HSPB1
ZFP36L13	6.20823e-26	0.313022	0.679	0.531	1.02442e-21	8	ZFP36L1
SFRP14	7.995e-26	0.347645	0.405	0.256	1.31926e-21	8	SFRP1
NR2F24	1.08411e-25	0.363869	0.429	0.279	1.78889e-21	8	NR2F2
ENSMMUG000000322314	1.37895e-25	0.352749	0.414	0.266	2.2754e-21	8	ENSMMUG00000032231
DHRS24	1.41612e-25	0.389539	0.35	0.21	2.33673e-21	8	DHRS2
NTRK24	1.50849e-25	0.338073	0.318	0.183	2.48916e-21	8	NTRK2
RND32	3.63725e-25	0.456623	0.296	0.17	6.00183e-21	8	RND3
EPHX14	8.15514e-25	0.34334	0.359	0.222	1.34568e-20	8	EPHX1
TGFBR34	3.08663e-24	0.314598	0.449	0.294	5.09325e-20	8	TGFBR3
IGFBP62	2.85309e-23	0.298635	0.429	0.284	4.70788e-19	8	IGFBP6
CTSC4	6.72315e-22	0.327972	0.334	0.208	1.10939e-17	8	CTSC
MFAP44	3.58126e-21	0.262295	0.508	0.348	5.90943e-17	8	MFAP4
PSD31	8.44057e-20	0.30349	0.27	0.159	1.39278e-15	8	PSD3
MYH111	2.22728e-19	0.270009	0.303	0.187	3.67524e-15	8	MYH11
EMP34	3.20396e-19	0.25228	0.571	0.437	5.28686e-15	8	EMP3
TCF214	7.96122e-19	0.268022	0.324	0.203	1.31368e-14	8	TCF21
NID13	1.61792e-16	0.284398	0.287	0.182	2.66974e-12	8	NID1
GSTM2	6.85332e-16	0.272841	0.831	0.801	1.13087e-11	8	GSTM2
HNMT1	1.55344e-15	0.292645	0.281	0.182	2.56333e-11	8	HNMT
MCL12	1.91841e-15	0.350967	0.366	0.268	3.16556e-11	8	MCL1
RNASE44	3.49886e-15	0.271127	0.4	0.291	5.77348e-11	8	RNASE4
RAMP24	4.3426e-15	0.290526	0.335	0.227	7.16573e-11	8	RAMP2
LHFPL62	4.58945e-15	0.254385	0.278	0.178	7.57306e-11	8	LHFPL6
SSPN2	1.19373e-14	0.26993	0.257	0.163	1.96977e-10	8	SSPN
SERPINH14	2.64517e-14	0.273736	0.426	0.316	4.3648e-10	8	SERPINH1
SSBP2	4.67688e-14	0.268152	0.253	0.162	7.71732e-10	8	SSBP2
TSC22D34	7.21837e-14	0.255646	0.571	0.468	1.1911e-09	8	TSC22D3
ANXA51	5.99448e-13	0.261083	0.465	0.37	9.89149e-09	8	ANXA5
ANXA21	9.62513e-13	0.262236	0.334	0.24	1.58824e-08	8	ANXA2
NOVA15	1.62846e-12	0.251516	0.334	0.236	2.68713e-08	8	NOVA1
ARL4A1	5.18656e-10	0.28291	0.301	0.222	8.55834e-06	8	ARL4A
ID2	2.76887e-08	0.253772	0.265	0.198	0.000456892	8	ID2
GPIHBP1	0	2.68827	0.691	0.007	0	9	GPIHBP1
CCN2	0	2.66944	0.699	0.071	0	9	CCN2
CLDN5	0	2.50086	0.675	0.008	0	9	CLDN5
APOD1	0	2.42081	0.832	0.185	0	9	APOD
IGFBP22	0	2.3925	0.864	0.215	0	9	IGFBP2
EGFL7	0	2.30966	0.791	0.051	0	9	EGFL7
CD74	0	2.24508	0.681	0.035	0	9	CD74
VWF	0	2.18518	0.63	0.007	0	9	VWF
RNASE1	0	2.0874	0.481	0.011	0	9	RNASE1
ENSMMUG00000055242	0	2.0798	0.92	0.191	0	9	ENSMMUG00000055242
GNG11	0	2.01669	0.81	0.148	0	9	GNG11
SRGN	0	2.01029	0.739	0.014	0	9	SRGN
PRND	0	1.89903	0.52	0.026	0	9	PRND
CD341	0	1.89122	0.782	0.132	0	9	CD34
GRB10	0	1.8545	0.609	0.015	0	9	GRB10
CD36	0	1.83081	0.503	0.022	0	9	CD36
TGFBR2	0	1.77971	0.619	0.036	0	9	TGFBR2
MT1X	0	1.75406	0.571	0.041	0	9	MT1X
ETS1	0	1.73143	0.661	0.035	0	9	ETS1
ENSMMUG000000142561	0	1.7075	0.993	0.8	0	9	ENSMMUG00000014256
EFNA1	0	1.66253	0.673	0.052	0	9	EFNA1
DEPP1	0	1.64444	0.375	0.018	0	9	DEPP1
B2M	0	1.61929	0.997	0.824	0	9	B2M
ADGRL4	0	1.60622	0.579	0.002	0	9	ADGRL4
ESAM	0	1.60435	0.587	0.007	0	9	ESAM
Mamu-B	0	1.59878	0.935	0.381	0	9	Mamu-B
HLA-DRB5	0	1.59229	0.471	0.039	0	9	HLA-DRB5
CD3202	0	1.58778	0.781	0.252	0	9	CD320
S100A16	0	1.58524	0.704	0.11	0	9	S100A16
NET1	0	1.57402	0.555	0.095	0	9	NET1
HSPG2	0	1.57307	0.661	0.097	0	9	HSPG2
PECAM1	0	1.56953	0.527	0.003	0	9	PECAM1
HLA-DRA	0	1.56688	0.518	0.029	0	9	HLA-DRA
CAV1	0	1.56536	0.639	0.06	0	9	CAV1
CD93	0	1.56132	0.537	0.005	0	9	CD93
S100A101	0	1.551	0.875	0.354	0	9	S100A10
PODXL	0	1.51815	0.473	0.004	0	9	PODXL
RGCC	0	1.50979	0.434	0.014	0	9	RGCC
TM4SF1	0	1.50111	0.559	0.047	0	9	TM4SF1
TMEM88	0	1.48445	0.514	0.009	0	9	TMEM88
ENSMMUG00000064140	0	1.47987	0.506	0.033	0	9	ENSMMUG00000064140
CALCRL	0	1.46993	0.511	0.023	0	9	CALCRL
SPARCL11	0	1.43619	0.853	0.349	0	9	SPARCL1
MAMU-A2	0	1.32574	0.892	0.315	0	9	MAMU-A
MCAM	0	1.28522	0.541	0.058	0	9	MCAM
ELK3	0	1.2759	0.536	0.045	0	9	ELK3
MEF2C	0	1.26212	0.601	0.103	0	9	MEF2C
ADAM15	0	1.23869	0.464	0.027	0	9	ADAM15
SLC9A3R2	0	1.23547	0.428	0.038	0	9	SLC9A3R2
GIMAP4	0	1.21407	0.439	0.004	0	9	GIMAP4
NUAK1	0	1.20811	0.4	0.008	0	9	NUAK1
LIMS2	0	1.1997	0.433	0.006	0	9	LIMS2
IFI16	0	1.19667	0.677	0.145	0	9	IFI16
TAGLN2	0	1.19332	0.656	0.139	0	9	TAGLN2
CRIP2	0	1.19307	0.464	0.037	0	9	CRIP2
CRIP1	0	1.13952	0.361	0.024	0	9	CRIP1
STX3	0	1.13498	0.471	0.05	0	9	STX3
EMCN	0	1.11016	0.405	0.002	0	9	EMCN
SOCS2	0	1.10299	0.507	0.053	0	9	SOCS2
FLI1	0	1.09778	0.405	0.003	0	9	FLI1
LMO2	0	1.07095	0.402	0.006	0	9	LMO2
SOX17	0	1.06872	0.321	0.004	0	9	SOX17
SNRK	0	1.06707	0.445	0.035	0	9	SNRK
EHD4	0	1.05581	0.409	0.026	0	9	EHD4
KIAA0355	0	1.04374	0.475	0.052	0	9	KIAA0355
SMTN	0	1.03109	0.392	0.021	0	9	SMTN
FAM171A1	0	1.02932	0.488	0.06	0	9	FAM171A1
ENTPD1	0	1.01294	0.361	0.016	0	9	ENTPD1
CLEC14A	0	1.00463	0.353	0.011	0	9	CLEC14A
KDR	0	0.983758	0.33	0.001	0	9	KDR
ITGA1	0	0.974119	0.355	0.006	0	9	ITGA1
ROBO4	0	0.96808	0.332	0.001	0	9	ROBO4
GMFG	0	0.96237	0.356	0.019	0	9	GMFG
F11R	0	0.959075	0.366	0.021	0	9	F11R
FILIP1	0	0.956975	0.352	0.02	0	9	FILIP1
ENSMMUG00000062238	0	0.955352	0.361	0.019	0	9	ENSMMUG00000062238
PSMB8	0	0.953255	0.455	0.059	0	9	PSMB8
TACC1	0	0.949563	0.429	0.056	0	9	TACC1
ADCY4	0	0.93965	0.33	0.002	0	9	ADCY4
ARHGAP29	0	0.934406	0.399	0.031	0	9	ARHGAP29
ENSMMUG00000008797	0	0.919491	0.356	0.014	0	9	ENSMMUG00000008797
CAV2	0	0.916048	0.518	0.083	0	9	CAV2
HHEX	0	0.915465	0.319	0.004	0	9	HHEX
TTYH2	0	0.906091	0.4	0.04	0	9	TTYH2
ITGA5	0	0.906077	0.339	0.01	0	9	ITGA5
TIE1	0	0.904773	0.327	0.001	0	9	TIE1
ERG	0	0.885847	0.327	0.001	0	9	ERG
PRKCH	0	0.884153	0.357	0.004	0	9	PRKCH
PALM2AKAP2	0	0.870087	0.377	0.027	0	9	PALM2AKAP2
MCF2L	0	0.861464	0.316	0.002	0	9	MCF2L
S1PR1	0	0.857965	0.317	0.003	0	9	S1PR1
PSMB9	0	0.848668	0.359	0.036	0	9	PSMB9
DYSF	0	0.836065	0.27	0.008	0	9	DYSF
TEK	0	0.83421	0.306	0.003	0	9	TEK
SLCO2B1	0	0.825226	0.346	0.011	0	9	SLCO2B1
MFNG	0	0.817205	0.326	0.004	0	9	MFNG
ENSMMUG00000049295	0	0.813543	0.304	0.002	0	9	ENSMMUG00000049295
CLEC3B	0	0.807683	0.283	0.013	0	9	CLEC3B
F8	0	0.802691	0.293	0.008	0	9	F8
TRIM22	0	0.802122	0.34	0.03	0	9	TRIM22
DLL4	0	0.801078	0.266	0.002	0	9	DLL4
ARAP1	0	0.78853	0.359	0.04	0	9	ARAP1
PIEZO1	0	0.759674	0.279	0.004	0	9	PIEZO1
TM6SF1	0	0.740175	0.269	0.004	0	9	TM6SF1
NPR1	0	0.73576	0.28	0.014	0	9	NPR1
FZD6	0	0.727007	0.3	0.012	0	9	FZD6
CTHRC1	0	0.715913	0.261	0.002	0	9	CTHRC1
ENSMMUG00000061756	0	0.709911	0.258	0.018	0	9	ENSMMUG00000061756
ENSMMUG00000057747	0	0.639549	0.293	0.028	0	9	ENSMMUG00000057747
TSPAN12	0	0.635445	0.262	0.01	0	9	TSPAN12
PPP2R5A	0	0.628906	0.314	0.032	0	9	PPP2R5A
PXN	0	0.604454	0.266	0.02	0	9	PXN
KIF1C	0	0.599601	0.253	0.022	0	9	KIF1C
CFLAR	1.65397e-306	0.646934	0.304	0.032	2.72921e-302	9	CFLAR
ARHGEF3	1.73316e-300	0.885961	0.415	0.061	2.85989e-296	9	ARHGEF3
MAP3K11	1.28562e-298	0.847407	0.421	0.063	2.1214e-294	9	MAP3K11
DUSP6	3.46367e-297	0.937582	0.364	0.048	5.7154e-293	9	DUSP6
RPS6KA3	2.07487e-295	0.574077	0.284	0.029	3.42375e-291	9	RPS6KA3
SERINC2	5.84787e-295	0.99258	0.528	0.099	9.64958e-291	9	SERINC2
TJP11	8.17498e-292	1.02032	0.488	0.087	1.34895e-287	9	TJP1
HDAC7	5.85908e-289	0.746101	0.387	0.054	9.66806e-285	9	HDAC7
TMEM159	1.97439e-279	0.670983	0.362	0.049	3.25795e-275	9	TMEM159
MSN	1.68418e-272	0.722654	0.409	0.063	2.77907e-268	9	MSN
APCDD1	2.34192e-268	0.59182	0.257	0.026	3.86441e-264	9	APCDD1
RPS28	6.1711e-260	0.806305	1	0.986	1.01829e-255	9	RPS28
LUZP1	4.57106e-256	0.601948	0.262	0.028	7.54271e-252	9	LUZP1
SEC14L11	9.4905e-255	0.9119	0.463	0.087	1.56603e-250	9	SEC14L1
CASKIN2	2.4223e-245	0.614456	0.284	0.035	3.99703e-241	9	CASKIN2
CTSH	4.96746e-242	0.63292	0.271	0.032	8.1968e-238	9	CTSH
SH3BP52	1.826e-238	0.95167	0.551	0.128	3.01308e-234	9	SH3BP5
TIMP31	2.5128e-235	0.97289	0.584	0.14	4.14637e-231	9	TIMP3
CCDC85B	3.84857e-235	1.06706	0.683	0.21	6.35052e-231	9	CCDC85B
TGFB1	1.08016e-232	0.548622	0.261	0.031	1.78237e-228	9	TGFB1
TAPBP	2.05933e-229	0.810795	0.471	0.096	3.3981e-225	9	TAPBP
FYN	2.57898e-228	0.6082	0.302	0.042	4.25558e-224	9	FYN
CLIC4	1.16582e-224	0.824026	0.45	0.089	1.92373e-220	9	CLIC4
RASAL2	4.75381e-219	0.642536	0.322	0.049	7.84427e-215	9	RASAL2
ENG1	7.24782e-218	1.13692	0.694	0.231	1.19596e-213	9	ENG
GUK1	4.80356e-213	0.951331	0.623	0.177	7.92635e-209	9	GUK1
SHC1	2.18449e-207	0.838982	0.507	0.117	3.60462e-203	9	SHC1
CD82	2.49682e-206	0.731047	0.385	0.07	4.12e-202	9	CD82
MAPK3	3.59388e-206	0.606621	0.321	0.051	5.93025e-202	9	MAPK3
ARHGDIB	2.99683e-205	0.837577	0.318	0.051	4.94506e-201	9	ARHGDIB
PLEKHO1	3.59001e-203	0.715976	0.379	0.07	5.92388e-199	9	PLEKHO1
CD9	3.42673e-202	0.682772	0.299	0.046	5.65445e-198	9	CD9
NPDC1	4.69314e-196	0.950011	0.555	0.149	7.74416e-192	9	NPDC1
IGF2BP2	1.10119e-195	0.593367	0.351	0.061	1.81708e-191	9	IGF2BP2
ECE1	2.53669e-184	0.686307	0.39	0.079	4.1858e-180	9	ECE1
PKN1	8.84006e-184	0.538131	0.292	0.047	1.4587e-179	9	PKN1
GNAI2.11	1.78244e-183	0.838998	0.531	0.143	2.9412e-179	9	GNAI2.1
MYH91	2.08239e-183	0.806029	0.558	0.155	3.43615e-179	9	MYH9
THY11	3.7574e-180	0.736478	0.374	0.075	6.20008e-176	9	THY1
RNF144A	9.3501e-179	0.4569	0.253	0.036	1.54286e-174	9	RNF144A
IL13RA1	3.09399e-178	0.494914	0.262	0.039	5.10539e-174	9	IL13RA1
MRRF	3.77144e-174	0.545069	0.296	0.05	6.22325e-170	9	MRRF
RALB	2.902e-172	0.645364	0.342	0.066	4.78858e-168	9	RALB
IL6ST1	2.12128e-169	0.927068	0.613	0.205	3.50032e-165	9	IL6ST
ADAM101	1.24391e-168	0.680519	0.442	0.106	2.05257e-164	9	ADAM10
JUP	1.13333e-166	0.59083	0.287	0.05	1.8701e-162	9	JUP
BNIP2	2.50318e-166	0.622795	0.372	0.078	4.1305e-162	9	BNIP2
TNS2	6.49852e-166	0.62546	0.353	0.071	1.07232e-161	9	TNS2
GNAQ	1.12306e-165	0.61442	0.381	0.082	1.85315e-161	9	GNAQ
SAT12	1.07218e-164	1.18775	0.6	0.208	1.7692e-160	9	SAT1
CAVIN21	6.41827e-164	0.784501	0.471	0.12	1.05908e-159	9	CAVIN2
CD151	8.94483e-161	0.676076	0.452	0.114	1.47599e-156	9	CD151
MOB2	1.46995e-159	0.625747	0.455	0.113	2.42556e-155	9	MOB2
NFIB	8.63169e-159	0.558899	0.318	0.061	1.42432e-154	9	NFIB
BTG12	7.72325e-154	0.827727	0.909	0.595	1.27441e-149	9	BTG1
NCOA71	4.6649e-153	0.769928	0.424	0.107	7.69755e-149	9	NCOA7
ENSMMUG000000502571	2.1061e-152	0.887151	0.575	0.186	3.47528e-148	9	ENSMMUG00000050257
TSNAX	5.55791e-151	0.646328	0.463	0.122	9.17111e-147	9	TSNAX
IFIT3	2.21596e-149	0.64738	0.323	0.067	3.65656e-145	9	IFIT3
NCK1	5.16634e-148	0.595197	0.378	0.087	8.52498e-144	9	NCK1
PPP3CA	9.16016e-148	0.570918	0.403	0.097	1.51152e-143	9	PPP3CA
YES1	6.07401e-146	0.554588	0.355	0.079	1.00227e-141	9	YES1
SETX	6.39456e-144	0.595864	0.301	0.06	1.05517e-139	9	SETX
GADD45A	1.27334e-143	0.64129	0.329	0.071	2.10114e-139	9	GADD45A
FRMD8	1.7743e-143	0.549403	0.28	0.053	2.92778e-139	9	FRMD8
ACTN41	1.92004e-143	0.684094	0.553	0.172	3.16825e-139	9	ACTN4
RAMP25	6.49121e-141	0.755339	0.63	0.218	1.07111e-136	9	RAMP2
CAPN2	8.84602e-140	0.457414	0.316	0.065	1.45968e-135	9	CAPN2
SWAP70	4.94764e-137	0.466386	0.3	0.061	8.1641e-133	9	SWAP70
NFKBIA	1.1749e-136	0.857931	0.717	0.305	1.9387e-132	9	NFKBIA
NEDD9	1.01097e-135	0.515223	0.254	0.047	1.6682e-131	9	NEDD9
LIMS1	2.50588e-135	0.766277	0.493	0.15	4.13496e-131	9	LIMS1
NECAP2	1.65047e-132	0.509658	0.327	0.073	2.72344e-128	9	NECAP2
DCLK2	1.67225e-130	0.498929	0.261	0.05	2.75938e-126	9	DCLK2
AOPEP	2.93084e-130	0.551555	0.353	0.085	4.83618e-126	9	AOPEP
TXNIP4	4.15978e-130	0.903619	0.88	0.556	6.86405e-126	9	TXNIP
TAOK2	7.06376e-128	0.431025	0.267	0.053	1.16559e-123	9	TAOK2
NAA38.1	2.24003e-127	0.684473	0.477	0.147	3.69628e-123	9	NAA38.1
RGL2	3.43109e-127	0.43291	0.259	0.05	5.66164e-123	9	RGL2
FKBP1A	2.87502e-125	0.787498	0.652	0.271	4.74408e-121	9	FKBP1A
CTBP2	2.99201e-124	0.580941	0.407	0.111	4.93712e-120	9	CTBP2
DDIT41	4.09855e-124	0.841735	0.596	0.228	6.76301e-120	9	DDIT4
BTN2A2	3.39763e-121	0.478598	0.305	0.069	5.60643e-117	9	BTN2A2
BTG21	2.51763e-120	0.583655	0.421	0.121	4.15435e-116	9	BTG2
VASP	4.43103e-120	0.491926	0.266	0.055	7.31165e-116	9	VASP
ZFP36L14	2.76082e-119	0.842022	0.819	0.528	4.55563e-115	9	ZFP36L1
ENSMMUG000000132575	1.48875e-117	0.694057	0.741	0.313	2.45658e-113	9	ENSMMUG00000013257
HIPK3	1.95242e-116	0.424412	0.271	0.058	3.2217e-112	9	HIPK3
RABGAP1	4.3886e-116	0.496851	0.326	0.079	7.24164e-112	9	RABGAP1
DAB2	6.00741e-116	0.554391	0.305	0.072	9.91283e-112	9	DAB2
SPRY1	3.18804e-115	0.507456	0.259	0.054	5.26058e-111	9	SPRY1
PZP	4.54842e-115	0.559606	0.302	0.071	7.50534e-111	9	PZP
PDK4	7.17698e-113	0.509485	0.334	0.084	1.18427e-108	9	PDK4
KCTD121	9.97072e-113	0.867899	0.395	0.121	1.64527e-108	9	KCTD12
IQGAP1	1.73692e-112	0.49153	0.392	0.109	2.86609e-108	9	IQGAP1
NADK	7.93506e-112	0.470753	0.348	0.091	1.30936e-107	9	NADK
REXO2	3.95815e-111	0.582457	0.447	0.139	6.53135e-107	9	REXO2
TPST2	6.51862e-111	0.523705	0.284	0.066	1.07564e-106	9	TPST2
RNF1812	4.56056e-110	0.63852	0.598	0.227	7.52539e-106	9	RNF181
TTF1	2.08458e-108	0.517436	0.304	0.074	3.43977e-104	9	TTF1
CHST12	1.15431e-107	0.411573	0.28	0.064	1.90473e-103	9	CHST12
NOSTRIN	3.03492e-106	0.572657	0.389	0.113	5.00792e-102	9	NOSTRIN
TBC1D16	6.01575e-106	0.416517	0.266	0.06	9.92659e-102	9	TBC1D16
BCAM3	4.7675e-105	0.677387	0.61	0.246	7.86685e-101	9	BCAM
ZBTB16	5.03317e-105	0.459999	0.385	0.108	8.30524e-101	9	ZBTB16
EHD2	2.82037e-102	0.544574	0.429	0.134	4.65389e-98	9	EHD2
CPD	6.05376e-100	0.441899	0.276	0.067	9.98931e-96	9	CPD
FGFR1	8.04883e-100	0.454883	0.364	0.103	1.32814e-95	9	FGFR1
PTRF1	6.40078e-98	0.693273	0.694	0.338	1.05619e-93	9	PTRF
TSPAN14	7.68277e-98	0.421525	0.349	0.098	1.26773e-93	9	TSPAN14
KLF6	3.98919e-97	0.684708	0.515	0.194	6.58255e-93	9	KLF6
LDB2	5.88615e-97	0.410691	0.288	0.072	9.71273e-93	9	LDB2
CTNND11	1.54912e-95	0.415429	0.33	0.091	2.55621e-91	9	CTNND1
DDX3X	3.03724e-94	0.510239	0.364	0.11	5.01175e-90	9	DDX3X
ENSMMUG000000556901	2.90713e-93	1.01122	0.548	0.22	4.79705e-89	9	ENSMMUG00000055690
TMSB10	3.43436e-92	0.641036	0.943	0.818	5.66704e-88	9	TMSB10
PPFIBP1	1.73233e-91	0.384933	0.348	0.1	2.85852e-87	9	PPFIBP1
DPYSL2	4.78823e-90	0.399225	0.309	0.085	7.90106e-86	9	DPYSL2
NCOA31	8.89478e-90	0.446061	0.352	0.105	1.46773e-85	9	NCOA3
TSPAN4	9.54078e-90	0.464286	0.357	0.108	1.57432e-85	9	TSPAN4
OXR1	1.36697e-88	0.449638	0.306	0.085	2.25564e-84	9	OXR1
PFKL	5.74468e-88	0.360384	0.318	0.089	9.4793e-84	9	PFKL
VAT1	8.50356e-88	0.411901	0.272	0.071	1.40317e-83	9	VAT1
ID1	1.41213e-87	0.747535	0.291	0.082	2.33016e-83	9	ID1
CLIC2	2.01395e-87	0.346049	0.259	0.064	3.32322e-83	9	CLIC2
GPX43	3.29825e-87	0.467486	0.433	0.149	5.44244e-83	9	GPX4
PLOD1	7.80116e-87	0.383554	0.265	0.067	1.28727e-82	9	PLOD1
PICALM	1.50511e-84	0.430414	0.306	0.088	2.48359e-80	9	PICALM
ADAR	3.29522e-84	0.412411	0.3	0.085	5.43744e-80	9	ADAR
[truncated: 2,780 more rows]

## Sheet: Fig. 1C- Human
	p_val	avg_logFC	pct.1	pct.2	p_val_adj	cluster	gene
MIR202HG	0	1.51421	0.882	0.286	0	0	MIR202HG
AMH	0	1.43671	0.903	0.325	0	0	AMH
INHA	0	1.09431	0.767	0.237	0	0	INHA
BEX1	0	1.06905	0.906	0.364	0	0	BEX1
PABPN1	0	1.03482	0.617	0.211	0	0	PABPN1
SOX9	0	1.03428	0.574	0.123	0	0	SOX9
APOA1	0	1.02599	0.933	0.504	0	0	APOA1
MT-ND1	0	0.960677	0.931	0.927	0	0	MT-ND1
ACSM3	0	0.960278	0.476	0.101	0	0	ACSM3
MUM1	0	0.95398	0.578	0.21	0	0	MUM1
SERPINA5	0	0.936038	0.763	0.338	0	0	SERPINA5
G6PD	0	0.923777	0.624	0.193	0	0	G6PD
SYNE2	0	0.90334	0.646	0.246	0	0	SYNE2
MT-CO3	0	0.902078	0.959	0.983	0	0	MT-CO3
INHBB	0	0.901555	0.435	0.079	0	0	INHBB
MT-CO1	0	0.899158	0.953	0.981	0	0	MT-CO1
MT-ND3	0	0.895571	0.924	0.912	0	0	MT-ND3
CTSV	0	0.876303	0.671	0.217	0	0	CTSV
GATM	0	0.871084	0.622	0.185	0	0	GATM
WIPF3	0	0.848773	0.491	0.142	0	0	WIPF3
CLDN11	0	0.832208	0.616	0.216	0	0	CLDN11
MT-ND4	0	0.828408	0.948	0.972	0	0	MT-ND4
FDXR	0	0.821822	0.561	0.162	0	0	FDXR
TMC5	0	0.818966	0.291	0.043	0	0	TMC5
RNASE1	0	0.812069	0.902	0.522	0	0	RNASE1
CITED1	0	0.804271	0.687	0.255	0	0	CITED1
LIPH	0	0.80189	0.32	0.045	0	0	LIPH
TANC2	0	0.800277	0.414	0.084	0	0	TANC2
CADM1	0	0.790166	0.434	0.106	0	0	CADM1
PLEKHH2	0	0.789245	0.369	0.095	0	0	PLEKHH2
CLEC4M	0	0.785787	0.31	0.052	0	0	CLEC4M
REEP1	0	0.785199	0.373	0.072	0	0	REEP1
MSI2	0	0.781158	0.475	0.148	0	0	MSI2
PRNP	0	0.77691	0.658	0.285	0	0	PRNP
MAP3K21	0	0.775908	0.349	0.051	0	0	MAP3K21
2023-09-06	0	0.772641	0.517	0.166	0	0	2023-09-06
ARAP2	0	0.767385	0.33	0.06	0	0	ARAP2
VCL	0	0.765688	0.46	0.13	0	0	VCL
OBSL1	0	0.761638	0.503	0.185	0	0	OBSL1
ZBTB20	0	0.751478	0.657	0.337	0	0	ZBTB20
FN3K	0	0.749347	0.33	0.064	0	0	FN3K
SCD	0	0.746427	0.376	0.071	0	0	SCD
CDH2	0	0.745163	0.413	0.098	0	0	CDH2
ARHGEF10	0	0.737795	0.324	0.068	0	0	ARHGEF10
MT-ND4L	0	0.733196	0.666	0.332	0	0	MT-ND4L
GSTA1	0	0.730094	0.767	0.32	0	0	GSTA1
SUSD3	0	0.728453	0.516	0.155	0	0	SUSD3
REEP6	0	0.72834	0.595	0.219	0	0	REEP6
HLTF	0	0.726461	0.486	0.168	0	0	HLTF
FSCN1	0	0.726157	0.549	0.203	0	0	FSCN1
TNNI3	0	0.723432	0.509	0.152	0	0	TNNI3
CACNB4	0	0.723223	0.299	0.055	0	0	CACNB4
SPOCK2	0	0.722836	0.376	0.078	0	0	SPOCK2
FHOD3	0	0.722546	0.31	0.049	0	0	FHOD3
RIMS4	0	0.71673	0.353	0.065	0	0	RIMS4
PTBP3	0	0.716463	0.402	0.105	0	0	PTBP3
PSME4	0	0.711251	0.363	0.077	0	0	PSME4
KIF21A	0	0.708253	0.344	0.072	0	0	KIF21A
CLU	0	0.706742	0.798	0.402	0	0	CLU
NKX3-1	0	0.705741	0.37	0.078	0	0	NKX3-1
AXL	0	0.704843	0.429	0.121	0	0	AXL
WNT6	0	0.704749	0.327	0.056	0	0	WNT6
FATE1	0	0.704594	0.597	0.214	0	0	FATE1
ZFAND5	0	0.702237	0.642	0.341	0	0	ZFAND5
KLHL23	0	0.698506	0.37	0.094	0	0	KLHL23
PLXNC1	0	0.697677	0.323	0.052	0	0	PLXNC1
ADGRG1	0	0.694708	0.351	0.076	0	0	ADGRG1
ZMYND8	0	0.694363	0.378	0.116	0	0	ZMYND8
MT-ND2	0	0.693065	0.943	0.968	0	0	MT-ND2
ABRACL	0	0.692709	0.521	0.171	0	0	ABRACL
C4orf48	0	0.683437	0.656	0.285	0	0	C4orf48
MBOAT7	0	0.682966	0.443	0.139	0	0	MBOAT7
SLC27A3	0	0.681964	0.391	0.106	0	0	SLC27A3
ZNF431	0	0.6819	0.31	0.082	0	0	ZNF431
SEMA7A	0	0.680341	0.323	0.054	0	0	SEMA7A
DDX17	0	0.672341	0.696	0.413	0	0	DDX17
SERINC5	0	0.67184	0.416	0.132	0	0	SERINC5
ATP1B1	0	0.661693	0.559	0.256	0	0	ATP1B1
BEX2	0	0.652234	0.499	0.173	0	0	BEX2
PPM1K	0	0.651117	0.396	0.128	0	0	PPM1K
TMEM123	0	0.64703	0.563	0.272	0	0	TMEM123
POMC	0	0.637154	0.366	0.116	0	0	POMC
MT-ATP6	0	0.637137	0.926	0.951	0	0	MT-ATP6
PPIF	0	0.636149	0.442	0.133	0	0	PPIF
KTN1	0	0.635934	0.722	0.427	0	0	KTN1
ERBB4	0	0.635424	0.257	0.039	0	0	ERBB4
DCBLD2	0	0.633026	0.361	0.099	0	0	DCBLD2
COPE	0	0.6322	0.834	0.53	0	0	COPE
GPC1	0	0.630449	0.339	0.091	0	0	GPC1
MT-CO2	0	0.626662	0.935	0.964	0	0	MT-CO2
DAG1	0	0.619105	0.361	0.094	0	0	DAG1
TMX4	0	0.618697	0.488	0.203	0	0	TMX4
KIF5C	0	0.615854	0.283	0.065	0	0	KIF5C
CSDC2	0	0.611626	0.323	0.067	0	0	CSDC2
GNG7	0	0.610685	0.403	0.11	0	0	GNG7
ASTN2	0	0.61048	0.298	0.057	0	0	ASTN2
HUWE1	0	0.610367	0.375	0.115	0	0	HUWE1
DOCK5	0	0.610006	0.297	0.07	0	0	DOCK5
TMEM97	0	0.609182	0.518	0.201	0	0	TMEM97
MT-CYB	0	0.604579	0.932	0.966	0	0	MT-CYB
MED25	0	0.602457	0.357	0.113	0	0	MED25
PLA2G16	0	0.600053	0.503	0.202	0	0	PLA2G16
PLA2G12A	0	0.598898	0.313	0.087	0	0	PLA2G12A
GPRC5B	0	0.596922	0.368	0.107	0	0	GPRC5B
GATA4	0	0.593114	0.411	0.126	0	0	GATA4
PRKAR2B	0	0.592057	0.404	0.146	0	0	PRKAR2B
WT1	0	0.588279	0.41	0.14	0	0	WT1
HERC5	0	0.587815	0.515	0.205	0	0	HERC5
FOXO3	0	0.581348	0.416	0.155	0	0	FOXO3
FUS	0	0.578345	0.825	0.618	0	0	FUS
RIC3	0	0.576924	0.302	0.092	0	0	RIC3
HK2	0	0.576057	0.258	0.041	0	0	HK2
SMIM1	0	0.574477	0.438	0.15	0	0	SMIM1
TCEAL2	0	0.572622	0.422	0.145	0	0	TCEAL2
NOTCH2	0	0.572555	0.374	0.118	0	0	NOTCH2
CAMSAP3	0	0.571962	0.259	0.041	0	0	CAMSAP3
MMP15	0	0.571821	0.316	0.077	0	0	MMP15
SEMA6C	0	0.570999	0.253	0.047	0	0	SEMA6C
MTRNR2L8	0	0.570253	0.417	0.147	0	0	MTRNR2L8
USP13	0	0.569751	0.276	0.059	0	0	USP13
CHPF	0	0.567871	0.383	0.124	0	0	CHPF
GADD45G	0	0.567107	0.629	0.317	0	0	GADD45G
NCOA2	0	0.56375	0.291	0.071	0	0	NCOA2
TMEM181	0	0.560518	0.286	0.076	0	0	TMEM181
ACSL4	0	0.560209	0.287	0.066	0	0	ACSL4
FLNB	0	0.556313	0.31	0.089	0	0	FLNB
KIF1B	0	0.554239	0.308	0.094	0	0	KIF1B
ZMYM3	0	0.548598	0.277	0.074	0	0	ZMYM3
MGST3	0	0.535717	0.82	0.604	0	0	MGST3
CYP27A1	0	0.535079	0.326	0.09	0	0	CYP27A1
ITGAV	0	0.532355	0.275	0.068	0	0	ITGAV
TRIM55	0	0.5297	0.315	0.081	0	0	TRIM55
HMGN5	0	0.527377	0.527	0.222	0	0	HMGN5
MTSS1	0	0.520733	0.276	0.072	0	0	MTSS1
CXADR	0	0.517052	0.286	0.07	0	0	CXADR
BRICD5	0	0.514434	0.289	0.071	0	0	BRICD5
MBNL3	0	0.510403	0.274	0.068	0	0	MBNL3
NUDT11	0	0.508546	0.394	0.141	0	0	NUDT11
GNG2	0	0.505662	0.311	0.081	0	0	GNG2
FSTL3	0	0.501858	0.272	0.072	0	0	FSTL3
JCAD	0	0.500496	0.272	0.075	0	0	JCAD
TMEM176B	0	0.497363	0.411	0.148	0	0	TMEM176B
SERPINF1	0	0.497197	0.834	0.517	0	0	SERPINF1
AC022075.1	0	0.493959	0.251	0.06	0	0	AC022075.1
ENDOD1	0	0.474865	0.265	0.07	0	0	ENDOD1
PEG10	0	0.47099	0.311	0.085	0	0	PEG10
BBX	1.05995e-303	0.636246	0.639	0.357	2.71983e-299	0	BBX
TSPYL2	7.26126e-302	0.607261	0.555	0.273	1.86324e-297	0	TSPYL2
CHML	1.05364e-300	0.474187	0.26	0.071	2.70365e-296	0	CHML
HMGCS1	3.33634e-298	0.549519	0.344	0.118	8.56104e-294	0	HMGCS1
ATP1A1	4.98642e-297	0.575966	0.518	0.241	1.27952e-292	0	ATP1A1
TCEAL5	7.21241e-297	0.517759	0.408	0.153	1.8507e-292	0	TCEAL5
CFI	1.75764e-293	0.494266	0.316	0.101	4.51011e-289	0	CFI
TFF3	2.52752e-293	0.379191	0.339	0.111	6.48561e-289	0	TFF3
WDFY2	9.03873e-293	0.501924	0.297	0.092	2.31934e-288	0	WDFY2
MTMR4	6.82972e-291	0.504968	0.266	0.076	1.75251e-286	0	MTMR4
TCEA3	3.49394e-290	0.486273	0.373	0.135	8.96545e-286	0	TCEA3
MT-ND5	2.00489e-287	0.442467	0.841	0.754	5.14455e-283	0	MT-ND5
TMEM41A	7.79629e-285	0.488419	0.311	0.102	2.00053e-280	0	TMEM41A
IFI27L1	7.57183e-284	0.537247	0.526	0.247	1.94293e-279	0	IFI27L1
IL11RA	2.42466e-281	0.539917	0.445	0.185	6.22167e-277	0	IL11RA
RBBP7	8.21987e-280	0.57945	0.683	0.406	2.10922e-275	0	RBBP7
ATP2B4	1.0595e-279	0.467267	0.281	0.086	2.71869e-275	0	ATP2B4
TSTD1	1.26174e-278	0.462127	0.396	0.15	3.23762e-274	0	TSTD1
PEG3	5.44029e-278	0.561681	0.445	0.187	1.39598e-273	0	PEG3
ZNF280B	3.23843e-274	0.488275	0.287	0.09	8.3098e-270	0	ZNF280B
GAS6	7.53201e-274	0.586864	0.492	0.229	1.93271e-269	0	GAS6
ISYNA1	3.7062e-272	0.571662	0.575	0.294	9.51011e-268	0	ISYNA1
BEX3	1.55254e-258	0.412977	0.859	0.674	3.98383e-254	0	BEX3
AFF4	2.36932e-258	0.530402	0.419	0.179	6.07966e-254	0	AFF4
CTNND1	6.13622e-258	0.485396	0.341	0.126	1.57455e-253	0	CTNND1
RUFY3	7.12328e-258	0.624969	0.34	0.127	1.82783e-253	0	RUFY3
PDPN	1.09875e-256	0.437286	0.268	0.083	2.81939e-252	0	PDPN
SLC25A37	1.88949e-256	0.547862	0.356	0.137	4.84842e-252	0	SLC25A37
NUDT10	5.88533e-253	0.449455	0.32	0.113	1.51018e-248	0	NUDT10
SLC25A4	2.03933e-252	0.513744	0.448	0.197	5.23292e-248	0	SLC25A4
NEAT1	4.80392e-250	0.431231	0.831	0.559	1.23269e-245	0	NEAT1
SMOC1	9.6785e-250	0.46296	0.321	0.114	2.4835e-245	0	SMOC1
MCL1	7.58573e-249	0.571041	0.524	0.275	1.9465e-244	0	MCL1
MYL6B	2.7177e-243	0.527186	0.573	0.315	6.97361e-239	0	MYL6B
FAM98A	1.97408e-241	0.45515	0.339	0.128	5.06549e-237	0	FAM98A
B4GALT1	1.72813e-240	0.443021	0.279	0.093	4.43439e-236	0	B4GALT1
ATF7IP2	2.45409e-240	0.489165	0.331	0.124	6.29721e-236	0	ATF7IP2
SAT2	5.84311e-240	0.566867	0.587	0.325	1.49934e-235	0	SAT2
BEX5	7.37182e-240	0.39293	0.265	0.084	1.89161e-235	0	BEX5
TUBA1A	4.77614e-239	0.505119	0.742	0.526	1.22556e-234	0	TUBA1A
MAP4K4	9.00308e-239	0.46472	0.382	0.157	2.31019e-234	0	MAP4K4
GTF2I	1.14564e-238	0.570688	0.544	0.288	2.93971e-234	0	GTF2I
CRTC3	3.04682e-236	0.424586	0.28	0.095	7.81813e-232	0	CRTC3
MAGED1	6.38308e-235	0.4818	0.418	0.185	1.6379e-230	0	MAGED1
STMN1	1.58665e-231	0.420474	0.738	0.464	4.07134e-227	0	STMN1
SPARC	8.98732e-231	0.407325	0.835	0.654	2.30615e-226	0	SPARC
PRDX6	5.17778e-229	0.431874	0.775	0.573	1.32862e-224	0	PRDX6
ADAM17	1.1515e-228	0.431716	0.252	0.082	2.95475e-224	0	ADAM17
CYP11A1	7.07416e-226	0.460423	0.338	0.132	1.81523e-221	0	CYP11A1
SLC7A5	7.14434e-222	0.323352	0.277	0.095	1.83324e-217	0	SLC7A5
WDR6	4.45955e-221	0.473871	0.28	0.099	1.14432e-216	0	WDR6
SCML1	4.90263e-220	0.510189	0.361	0.15	1.25801e-215	0	SCML1
RAC3	8.14631e-219	0.39659	0.323	0.123	2.09034e-214	0	RAC3
ABCA8	1.37061e-217	0.497443	0.354	0.142	3.51698e-213	0	ABCA8
ATXN2	2.74793e-217	0.534612	0.354	0.149	7.0512e-213	0	ATXN2
UBA6	1.47986e-216	0.522182	0.261	0.09	3.79731e-212	0	UBA6
SLC25A36	5.99595e-216	0.516936	0.454	0.222	1.53856e-211	0	SLC25A36
JAM2	7.57917e-216	0.417979	0.352	0.145	1.94482e-211	0	JAM2
KMT2C	3.31048e-214	0.469598	0.332	0.133	8.4947e-210	0	KMT2C
NRIP1	5.94346e-212	0.394771	0.258	0.088	1.52509e-207	0	NRIP1
SPINT2	3.82486e-210	0.38842	0.473	0.224	9.81458e-206	0	SPINT2
SQLE	2.36086e-207	0.444138	0.381	0.168	6.05797e-203	0	SQLE
TMEM245	3.07556e-206	0.488981	0.31	0.123	7.89189e-202	0	TMEM245
CCND2	6.52302e-204	0.462403	0.409	0.189	1.67381e-199	0	CCND2
QKI	2.01168e-203	0.478274	0.388	0.177	5.16198e-199	0	QKI
COL1A2	5.86513e-202	0.398105	0.76	0.504	1.50499e-197	0	COL1A2
SGCE	9.05184e-202	0.43868	0.352	0.146	2.3227e-197	0	SGCE
CELF1	1.49708e-201	0.508233	0.372	0.168	3.84152e-197	0	CELF1
BOD1L1	2.30816e-201	0.47673	0.359	0.155	5.92274e-197	0	BOD1L1
LIMCH1	2.65066e-201	0.443076	0.284	0.107	6.8016e-197	0	LIMCH1
RAD21	1.01034e-200	0.46374	0.515	0.278	2.59254e-196	0	RAD21
PHGDH	1.60108e-200	0.460762	0.507	0.262	4.10838e-196	0	PHGDH
NUMA1	5.71563e-200	0.439452	0.32	0.13	1.46663e-195	0	NUMA1
GMPR	1.38377e-196	0.428405	0.336	0.14	3.55076e-192	0	GMPR
LRPPRC	3.57323e-196	0.412708	0.287	0.11	9.16892e-192	0	LRPPRC
GSTA4	3.30065e-195	0.426519	0.412	0.191	8.46947e-191	0	GSTA4
MTRNR2L12	1.91367e-194	0.336801	0.279	0.104	4.91048e-190	0	MTRNR2L12
RBM6	5.12382e-194	0.601378	0.347	0.152	1.31477e-189	0	RBM6
RBP1	1.47095e-193	0.378743	0.487	0.243	3.77445e-189	0	RBP1
TINAGL1	1.47618e-193	0.370666	0.274	0.102	3.78789e-189	0	TINAGL1
ZYX	4.28243e-192	0.433815	0.322	0.133	1.09887e-187	0	ZYX
SOX4	1.35601e-189	0.524786	0.569	0.333	3.47953e-185	0	SOX4
IVNS1ABP	2.96172e-189	0.382181	0.258	0.094	7.59978e-185	0	IVNS1ABP
KAT2A	5.91257e-189	0.581634	0.253	0.093	1.51717e-184	0	KAT2A
MARCKSL1	1.198e-188	0.374919	0.804	0.645	3.07407e-184	0	MARCKSL1
SLMAP	8.50815e-188	0.437777	0.307	0.126	2.18319e-183	0	SLMAP
FNIP1	1.01385e-187	0.406331	0.352	0.155	2.60154e-183	0	FNIP1
CKB	1.02592e-186	0.356211	0.696	0.438	2.63251e-182	0	CKB
BMPR2	3.44134e-186	0.395849	0.3	0.122	8.83048e-182	0	BMPR2
CAND1	4.15216e-185	0.406028	0.372	0.169	1.06544e-180	0	CAND1
FOXN3	5.54373e-185	0.415636	0.298	0.121	1.42252e-180	0	FOXN3
TRA2A	1.23419e-182	0.513301	0.373	0.175	3.16694e-178	0	TRA2A
DDB1	2.32601e-182	0.45805	0.406	0.2	5.96855e-178	0	DDB1
EPM2AIP1	8.55661e-182	0.392764	0.314	0.131	2.19563e-177	0	EPM2AIP1
CD99	6.62938e-181	0.392296	0.78	0.618	1.7011e-176	0	CD99
MDM4	1.9341e-180	0.532868	0.356	0.163	4.96289e-176	0	MDM4
PPP3CA	1.13725e-176	0.446726	0.322	0.141	2.91817e-172	0	PPP3CA
ZKSCAN1	1.43904e-176	0.444511	0.325	0.142	3.69259e-172	0	ZKSCAN1
INSR	1.46376e-176	0.391812	0.399	0.192	3.756e-172	0	INSR
HELZ	1.60177e-175	0.409336	0.251	0.094	4.11013e-171	0	HELZ
DDX24	1.59812e-174	0.411387	0.679	0.461	4.10078e-170	0	DDX24
HNRNPH1	1.88901e-174	0.580197	0.498	0.282	4.84719e-170	0	HNRNPH1
COL18A1	1.23585e-173	0.46909	0.371	0.175	3.1712e-169	0	COL18A1
WNK1	4.93678e-171	0.408997	0.324	0.144	1.26678e-166	0	WNK1
STK24	1.64306e-170	0.382685	0.289	0.12	4.2161e-166	0	STK24
UBA1	1.80652e-170	0.404653	0.324	0.143	4.63554e-166	0	UBA1
MLLT6	1.37398e-168	0.460512	0.291	0.122	3.52564e-164	0	MLLT6
CXXC5	4.25714e-167	0.370515	0.274	0.112	1.09238e-162	0	CXXC5
POGZ	1.315e-165	0.494236	0.328	0.15	3.3743e-161	0	POGZ
ITGA6	4.84239e-164	0.337713	0.284	0.118	1.24256e-159	0	ITGA6
SEC14L1	2.13892e-163	0.36265	0.348	0.161	5.48848e-159	0	SEC14L1
ASS1	4.85557e-163	0.412458	0.332	0.151	1.24594e-158	0	ASS1
S100A16	2.54869e-161	0.398145	0.534	0.303	6.53993e-157	0	S100A16
USP22	3.01297e-160	0.397546	0.322	0.146	7.73129e-156	0	USP22
PEBP1	3.28212e-160	0.3624	0.779	0.62	8.42191e-156	0	PEBP1
SLC38A2	6.30481e-160	0.349742	0.394	0.195	1.61782e-155	0	SLC38A2
RABGAP1	4.64103e-159	0.390368	0.252	0.1	1.19089e-154	0	RABGAP1
VPS35	8.77749e-159	0.407445	0.424	0.221	2.2523e-154	0	VPS35
EGR1	1.57559e-158	0.465651	0.617	0.415	4.04297e-154	0	EGR1
LSR	1.96566e-158	0.350397	0.264	0.108	5.04388e-154	0	LSR
SETD5	3.86058e-155	0.390593	0.321	0.147	9.90624e-151	0	SETD5
HIGD2A	4.27371e-155	0.393963	0.518	0.299	1.09663e-150	0	HIGD2A
TGIF1	5.16388e-155	0.33912	0.274	0.115	1.32505e-150	0	TGIF1
IFRD1	1.30459e-154	0.42692	0.416	0.22	3.34757e-150	0	IFRD1
ADNP	3.47437e-154	0.352523	0.268	0.111	8.91524e-150	0	ADNP
USP11	5.22321e-154	0.351978	0.353	0.166	1.34028e-149	0	USP11
MIR99AHG	2.71684e-151	0.407571	0.364	0.176	6.97142e-147	0	MIR99AHG
HPRT1	1.08744e-150	0.357252	0.435	0.229	2.79037e-146	0	HPRT1
TAOK3	1.18458e-149	0.351383	0.279	0.12	3.03964e-145	0	TAOK3
CITED4	1.5989e-149	0.331209	0.276	0.118	4.10277e-145	0	CITED4
MRPL16	1.22492e-147	0.402648	0.383	0.196	3.14315e-143	0	MRPL16
RHOBTB3	9.36764e-147	0.404851	0.465	0.255	2.40374e-142	0	RHOBTB3
TTC14	4.32316e-143	0.460449	0.307	0.143	1.10932e-138	0	TTC14
TCEAL9	1.85294e-140	0.346129	0.691	0.499	4.75465e-136	0	TCEAL9
BEX4	1.10729e-136	0.346007	0.439	0.242	2.84131e-132	0	BEX4
MAP2K7	4.55381e-136	0.325571	0.253	0.108	1.16851e-131	0	MAP2K7
LAPTM4A	3.45799e-135	0.290163	0.865	0.752	8.87321e-131	0	LAPTM4A
CTNNAL1	8.81033e-135	0.34012	0.384	0.198	2.26073e-130	0	CTNNAL1
ZMYM2	2.33637e-134	0.417241	0.331	0.162	5.99513e-130	0	ZMYM2
RBM5	9.35436e-134	0.435155	0.31	0.149	2.40033e-129	0	RBM5
RNF19A	2.84574e-133	0.355038	0.286	0.131	7.30217e-129	0	RNF19A
MVP	1.17308e-132	0.347138	0.259	0.114	3.01013e-128	0	MVP
MAP1B	1.87202e-132	0.330932	0.393	0.204	4.80361e-128	0	MAP1B
TNRC6B	5.28852e-132	0.394756	0.422	0.234	1.35704e-127	0	TNRC6B
MT-ND6	1.14184e-131	0.299655	0.285	0.13	2.92997e-127	0	MT-ND6
SRSF9	2.08701e-131	0.358956	0.635	0.439	5.35526e-127	0	SRSF9
MAT2A	4.50835e-131	0.368407	0.306	0.147	1.15684e-126	0	MAT2A
ST5	1.15774e-130	0.360634	0.348	0.174	2.97076e-126	0	ST5
FBXO21	1.50055e-129	0.400389	0.431	0.244	3.85042e-125	0	FBXO21
ALDH1A1	3.99033e-126	0.312272	0.524	0.312	1.02392e-121	0	ALDH1A1
SPTAN1	9.26008e-126	0.350508	0.336	0.17	2.37614e-121	0	SPTAN1
SLF2	6.71384e-125	0.364034	0.382	0.203	1.72277e-120	0	SLF2
TIA1	1.03899e-124	0.416101	0.255	0.115	2.66606e-120	0	TIA1
HSPH1	5.25653e-124	0.445515	0.405	0.228	1.34882e-119	0	HSPH1
PRRC2B	6.27387e-124	0.314974	0.275	0.127	1.60987e-119	0	PRRC2B
C5orf24	8.37289e-123	0.324734	0.302	0.146	2.14848e-118	0	C5orf24
TSEN34	9.37594e-123	0.343341	0.41	0.228	2.40587e-118	0	TSEN34
MID1IP1	2.37635e-122	0.262076	0.253	0.111	6.09772e-118	0	MID1IP1
TSPYL1	3.85398e-122	0.316929	0.336	0.17	9.88932e-118	0	TSPYL1
KIDINS220	4.71419e-122	0.335098	0.261	0.118	1.20966e-117	0	KIDINS220
SMARCA1	9.36443e-122	0.359553	0.355	0.186	2.40291e-117	0	SMARCA1
TJP1	1.31788e-120	0.380501	0.384	0.211	3.38168e-116	0	TJP1
PDCD6IP	4.95079e-119	0.418165	0.291	0.143	1.27037e-114	0	PDCD6IP
CKAP4	8.0157e-119	0.293152	0.282	0.133	2.05683e-114	0	CKAP4
PLEKHJ1	1.26863e-118	0.321014	0.363	0.192	3.25531e-114	0	PLEKHJ1
DST	1.70529e-117	0.316565	0.324	0.163	4.37577e-113	0	DST
DNAJB4	7.33199e-117	0.282996	0.257	0.117	1.88139e-112	0	DNAJB4
SREK1IP1	5.54319e-116	0.330914	0.348	0.184	1.42238e-111	0	SREK1IP1
TRIM33	6.31513e-116	0.324222	0.253	0.117	1.62046e-111	0	TRIM33
ERG28	1.00425e-115	0.323095	0.411	0.232	2.5769e-111	0	ERG28
TNRC6A	1.49728e-115	0.341115	0.277	0.133	3.84203e-111	0	TNRC6A
BAZ2B	4.38699e-115	0.374362	0.307	0.156	1.1257e-110	0	BAZ2B
XPO1	6.53014e-115	0.318131	0.269	0.127	1.67563e-110	0	XPO1
ADAR	1.77627e-113	0.360079	0.354	0.191	4.55792e-109	0	ADAR
MAP3K13	3.14148e-111	0.338029	0.33	0.172	8.06105e-107	0	MAP3K13
BSDC1	3.96356e-111	0.366357	0.281	0.139	1.01705e-106	0	BSDC1
THUMPD3-AS1	6.0042e-111	0.430986	0.318	0.166	1.54068e-106	0	THUMPD3-AS1
TCF25	4.09251e-110	0.42003	0.499	0.322	1.05014e-105	0	TCF25
N4BP2L2	5.62307e-110	0.46606	0.662	0.479	1.44288e-105	0	N4BP2L2
TSC2	1.1361e-109	0.389134	0.296	0.15	2.91522e-105	0	TSC2
CLK1	1.32376e-109	0.325449	0.383	0.213	3.39677e-105	0	CLK1
CTSA	1.03272e-108	0.305687	0.26	0.124	2.64996e-104	0	CTSA
LUC7L3	3.20702e-108	0.488589	0.562	0.381	8.22921e-104	0	LUC7L3
BRWD1	5.43676e-107	0.374803	0.295	0.151	1.39507e-102	0	BRWD1
ENO1	1.11517e-105	0.32735	0.638	0.465	2.86152e-101	0	ENO1
EXOC7	1.52245e-105	0.335586	0.285	0.143	3.90661e-101	0	EXOC7
ECH1	1.77632e-105	0.349445	0.518	0.342	4.55804e-101	0	ECH1
TSC22D4	6.93629e-105	0.308395	0.273	0.134	1.77985e-100	0	TSC22D4
SF1	2.07795e-104	0.376141	0.553	0.383	5.33202e-100	0	SF1
MYO6	4.86059e-103	0.48523	0.269	0.136	1.24723e-98	0	MYO6
APPBP2	5.40638e-103	0.310361	0.266	0.131	1.38728e-98	0	APPBP2
ABI2	1.12239e-102	0.334584	0.311	0.165	2.88006e-98	0	ABI2
RAB6A	2.36189e-102	0.329447	0.301	0.158	6.06061e-98	0	RAB6A
SMAD2	7.5821e-102	0.293044	0.256	0.125	1.94557e-97	0	SMAD2
SCRG1	7.87307e-102	0.278561	0.294	0.149	2.02023e-97	0	SCRG1
TUT4	7.92001e-102	0.350068	0.299	0.157	2.03227e-97	0	TUT4
CCDC28B	1.40358e-101	0.267053	0.26	0.126	3.60159e-97	0	CCDC28B
UPF2	2.68436e-101	0.361972	0.319	0.171	6.88807e-97	0	UPF2
PRPF4B	8.37719e-101	0.303973	0.32	0.17	2.14959e-96	0	PRPF4B
MTF2	3.68732e-100	0.342107	0.313	0.167	9.46167e-96	0	MTF2
SMARCA5	4.53346e-99	0.287612	0.376	0.214	1.16329e-94	0	SMARCA5
CAMTA1	4.96755e-99	0.319413	0.457	0.284	1.27467e-94	0	CAMTA1
BAZ2A	6.26387e-99	0.331732	0.301	0.16	1.60731e-94	0	BAZ2A
ZNF518A	1.02221e-98	0.392082	0.284	0.146	2.62298e-94	0	ZNF518A
COMT	4.4164e-97	0.297322	0.453	0.278	1.13325e-92	0	COMT
WAC	1.1737e-95	0.336024	0.34	0.192	3.01171e-91	0	WAC
GRN	1.35764e-95	0.285127	0.393	0.229	3.48371e-91	0	GRN
SERINC1	1.75219e-95	0.27654	0.328	0.18	4.49611e-91	0	SERINC1
PLIN3	3.69185e-95	0.291342	0.277	0.143	9.47329e-91	0	PLIN3
DNAJB1	1.2837e-94	0.301379	0.563	0.398	3.29398e-90	0	DNAJB1
TXN2	2.66718e-94	0.322398	0.391	0.233	6.84397e-90	0	TXN2
ARID5B	5.38172e-93	0.274437	0.294	0.155	1.38095e-88	0	ARID5B
IRF2BP2	1.60107e-92	0.253896	0.274	0.142	4.10835e-88	0	IRF2BP2
INTS6	1.74744e-91	0.29361	0.38	0.223	4.48393e-87	0	INTS6
CMTM6	1.7908e-91	0.274072	0.257	0.13	4.59518e-87	0	CMTM6
GGA1	1.57748e-90	0.346739	0.269	0.14	4.04781e-86	0	GGA1
TSTA3	6.26288e-90	0.266607	0.293	0.156	1.60705e-85	0	TSTA3
MPZL1	1.14947e-89	0.260928	0.287	0.152	2.94955e-85	0	MPZL1
SFPQ	1.33435e-89	0.343093	0.574	0.406	3.42394e-85	0	SFPQ
EIF4G1	4.28873e-89	0.262365	0.267	0.138	1.10049e-84	0	EIF4G1
POLR2F	6.3019e-89	0.34018	0.481	0.316	1.61707e-84	0	POLR2F
SRSF11	9.10723e-87	0.42668	0.547	0.384	2.33692e-82	0	SRSF11
NFE2L2	2.09717e-86	0.318585	0.459	0.296	5.38133e-82	0	NFE2L2
PHIP	2.63901e-85	0.320618	0.332	0.191	6.7717e-81	0	PHIP
MACF1	4.58076e-85	0.315367	0.299	0.165	1.17542e-80	0	MACF1
VGLL4	1.22972e-84	0.265712	0.367	0.216	3.15546e-80	0	VGLL4
CHD4	1.44447e-84	0.260527	0.324	0.185	3.70652e-80	0	CHD4
SRPK2	1.84565e-84	0.3126	0.357	0.21	4.73594e-80	0	SRPK2
SNRNP200	2.41321e-84	0.282263	0.286	0.155	6.19231e-80	0	SNRNP200
ATP5MD	2.99514e-83	0.257129	0.602	0.436	7.68553e-79	0	ATP5MD
S100A13	3.66483e-83	0.273987	0.569	0.402	9.40395e-79	0	S100A13
ARL6IP1	7.72878e-83	0.263615	0.468	0.305	1.9832e-78	0	ARL6IP1
ENAH	8.24863e-82	0.291466	0.366	0.218	2.1166e-77	0	ENAH
MARK3	7.82519e-81	0.291425	0.284	0.157	2.00794e-76	0	MARK3
OGA	7.26873e-80	0.30261	0.31	0.176	1.86516e-75	0	OGA
KANSL1	9.60238e-80	0.277685	0.302	0.17	2.46397e-75	0	KANSL1
HNRNPA2B1	5.75621e-79	0.273218	0.781	0.664	1.47704e-74	0	HNRNPA2B1
CTNNB1	1.80961e-78	0.28916	0.323	0.188	4.64347e-74	0	CTNNB1
LAPTM4B	3.07637e-78	0.267193	0.335	0.197	7.89397e-74	0	LAPTM4B
PURA	5.36117e-78	0.255613	0.296	0.167	1.37568e-73	0	PURA
NDFIP1	9.34536e-78	0.271452	0.459	0.301	2.39802e-73	0	NDFIP1
KMT2E	1.26922e-76	0.321486	0.442	0.291	3.25683e-72	0	KMT2E
HMGN1	1.02277e-75	0.29118	0.652	0.507	2.62442e-71	0	HMGN1
RBBP4	1.41661e-74	0.277064	0.346	0.208	3.63502e-70	0	RBBP4
AHI1	2.56156e-74	0.348909	0.274	0.154	6.57297e-70	0	AHI1
ABCD4	2.52795e-72	0.290095	0.26	0.144	6.48672e-68	0	ABCD4
WSB1	2.12903e-70	0.293475	0.541	0.388	5.46309e-66	0	WSB1
UROD	2.48818e-70	0.265361	0.347	0.211	6.38467e-66	0	UROD
HNRNPU	1.27889e-69	0.275991	0.575	0.43	3.28163e-65	0	HNRNPU
NONO	1.4463e-69	0.263828	0.407	0.263	3.7112e-65	0	NONO
ZFAND6	1.69479e-69	0.272162	0.425	0.276	4.34884e-65	0	ZFAND6
SRSF6	1.36413e-67	0.310676	0.301	0.179	3.50036e-63	0	SRSF6
IP6K2	4.61063e-67	0.272946	0.316	0.19	1.18309e-62	0	IP6K2
NKTR	2.49003e-65	0.320349	0.509	0.358	6.38943e-61	0	NKTR
BPTF	6.82876e-65	0.273022	0.387	0.25	1.75226e-60	0	BPTF
HMGN3	2.64811e-64	0.253668	0.556	0.406	6.79504e-60	0	HMGN3
HP1BP3	8.68378e-64	0.274967	0.402	0.265	2.22826e-59	0	HP1BP3
EIF4G2	9.24859e-63	0.252602	0.556	0.413	2.37319e-58	0	EIF4G2
SRSF10	3.08945e-59	0.251871	0.446	0.306	7.92753e-55	0	SRSF10
SH3BP5	1.1921e-57	0.267316	0.322	0.2	3.05892e-53	0	SH3BP5
RBM39	9.30789e-57	0.265903	0.599	0.461	2.3884e-52	0	RBM39
ALDH9A1	1.34504e-56	0.256391	0.4	0.27	3.45136e-52	0	ALDH9A1
CHD9	1.52992e-52	0.271506	0.412	0.285	3.92577e-48	0	CHD9
TMEM259	2.70193e-51	0.264964	0.26	0.158	6.93317e-47	0	TMEM259
ZNF207	7.67012e-49	0.250653	0.337	0.223	1.96815e-44	0	ZNF207
USP34	8.71691e-49	0.255903	0.259	0.159	2.23676e-44	0	USP34
SRSF5	6.07759e-48	0.280057	0.655	0.534	1.55951e-43	0	SRSF5
ZRANB2	8.54338e-36	0.25974	0.297	0.204	2.19223e-31	0	ZRANB2
CFD	0	2.36279	0.376	0.08	0	1	CFD
DCN	0	1.98124	0.966	0.298	0	1	DCN
C7	0	1.66689	0.638	0.124	0	1	C7
PENK	0	1.58331	0.404	0.096	0	1	PENK
LUM	0	1.39454	0.321	0.029	0	1	LUM
DLK1	0	1.39295	0.614	0.204	0	1	DLK1
IGFBP5	0	1.32792	0.494	0.12	0	1	IGFBP5
C1R	0	1.2	0.583	0.163	0	1	C1R
IGF1	0	1.18813	0.43	0.096	0	1	IGF1
C1S	0	1.16439	0.672	0.187	0	1	C1S
COL1A1	0	1.15196	0.803	0.273	0	1	COL1A1
SFRP1	0	1.1349	0.434	0.181	0	1	SFRP1
COL3A1	0	1.04535	0.665	0.217	0	1	COL3A1
VIM	0	1.03263	0.986	0.763	0	1	VIM
ADIRF	0	1.00711	0.499	0.164	0	1	ADIRF
LHX9	0	1.00641	0.441	0.087	0	1	LHX9
MDK	0	0.994443	0.574	0.216	0	1	MDK
DPT	0	0.993083	0.284	0.062	0	1	DPT
SELENOP	0	0.972868	0.736	0.325	0	1	SELENOP
MEST	0	0.966052	0.406	0.101	0	1	MEST
SERPING1	0	0.965736	0.427	0.132	0	1	SERPING1
SERPINE2	0	0.951242	0.542	0.198	0	1	SERPINE2
PCOLCE	0	0.928802	0.344	0.071	0	1	PCOLCE
GSTM5	0	0.920277	0.376	0.086	0	1	GSTM5
CTSC	0	0.916026	0.426	0.114	0	1	CTSC
LTBP4	0	0.901235	0.67	0.245	0	1	LTBP4
RARRES2	0	0.900253	0.568	0.19	0	1	RARRES2
COL6A2	0	0.863323	0.7	0.269	0	1	COL6A2
FXYD1	0	0.855308	0.401	0.085	0	1	FXYD1
INHBA	0	0.840399	0.346	0.074	0	1	INHBA
OLFML3	0	0.820811	0.312	0.051	0	1	OLFML3
PLPP3	0	0.813944	0.397	0.141	0	1	PLPP3
THY1	0	0.797676	0.32	0.098	0	1	THY1
PLAC9	0	0.78069	0.619	0.224	0	1	PLAC9
ANGPTL1	0	0.757059	0.336	0.086	0	1	ANGPTL1
OSR2	0	0.756562	0.58	0.204	0	1	OSR2
PMP22	0	0.746743	0.458	0.168	0	1	PMP22
FCGRT	0	0.745271	0.638	0.27	0	1	FCGRT
MEG3	0	0.738136	0.787	0.295	0	1	MEG3
NDRG2	0	0.734612	0.439	0.174	0	1	NDRG2
FTL	0	0.720356	0.973	0.807	0	1	FTL
HSPB6	0	0.694481	0.342	0.098	0	1	HSPB6
NR2F2	0	0.692133	0.709	0.294	0	1	NR2F2
MFAP4	0	0.690308	0.396	0.135	0	1	MFAP4
CYGB	0	0.689537	0.265	0.049	0	1	CYGB
BST2	0	0.667631	0.681	0.312	0	1	BST2
CXCL12	0	0.666133	0.312	0.078	0	1	CXCL12
CYP1B1	0	0.654879	0.367	0.116	0	1	CYP1B1
RPL10	0	0.654646	0.997	0.934	0	1	RPL10
OGN	0	0.64578	0.325	0.097	0	1	OGN
COL6A1	0	0.637917	0.489	0.184	0	1	COL6A1
TIMP1	0	0.613794	0.865	0.538	0	1	TIMP1
MMP2	0	0.597059	0.532	0.214	0	1	MMP2
RPL6	0	0.582863	0.978	0.821	0	1	RPL6
RPL10A	0	0.560756	0.98	0.849	0	1	RPL10A
RPL7	0	0.552868	0.995	0.909	0	1	RPL7
RPS5	0	0.552529	0.955	0.82	0	1	RPS5
EEF1A1	0	0.539057	0.998	0.959	0	1	EEF1A1
RPL12	0	0.507676	0.988	0.873	0	1	RPL12
RPS8	0	0.501411	0.993	0.92	0	1	RPS8
RACK1	0	0.499538	0.962	0.814	0	1	RACK1
RPL13A	0	0.478846	0.998	0.954	0	1	RPL13A
RPL13	0	0.47783	0.997	0.954	0	1	RPL13
RPL8	0	0.476327	0.988	0.898	0	1	RPL8
RPS3A	0	0.465341	0.992	0.917	0	1	RPS3A
RPL15	0	0.452024	0.989	0.923	0	1	RPL15
RPL7A	0	0.451905	0.975	0.867	0	1	RPL7A
RPL29	0	0.435031	0.977	0.859	0	1	RPL29
RPL21	0	0.430005	0.994	0.936	0	1	RPL21
RPL5	0	0.428738	0.978	0.874	0	1	RPL5
RPL9	0	0.426035	0.987	0.9	0	1	RPL9
RPS2	0	0.42483	0.986	0.929	0	1	RPS2
RPS9	0	0.404592	0.984	0.888	0	1	RPS9
RPS18	0	0.360973	0.997	0.966	0	1	RPS18
RPL18A	2.33489e-303	0.403436	0.988	0.904	5.99133e-299	1	RPL18A
RPL11	1.10374e-297	0.358649	0.992	0.929	2.8322e-293	1	RPL11
CD81	1.20298e-294	0.879976	0.71	0.457	3.08684e-290	1	CD81
PLTP	5.40173e-292	0.856611	0.365	0.13	1.38608e-287	1	PLTP
COL1A21	1.22919e-290	0.603965	0.811	0.505	3.1541e-286	1	COL1A2
RPL24	3.84606e-289	0.442709	0.962	0.816	9.869e-285	1	RPL24
LHFPL6	3.27503e-288	0.684662	0.346	0.119	8.40373e-284	1	LHFPL6
RPS27A	3.84456e-287	0.380186	0.995	0.938	9.86514e-283	1	RPS27A
RPS7	6.97896e-285	0.400853	0.972	0.855	1.7908e-280	1	RPS7
F10	7.16264e-284	0.63479	0.348	0.116	1.83793e-279	1	F10
RPL19	5.10811e-281	0.357128	0.987	0.911	1.31074e-276	1	RPL19
PTN	5.96094e-273	0.673801	0.404	0.154	1.52958e-268	1	PTN
SSPN	2.46297e-270	0.637358	0.409	0.161	6.31999e-266	1	SSPN
RPL18	6.76015e-270	0.372416	0.982	0.896	1.73465e-265	1	RPL18
RPS23	8.17531e-269	0.375577	0.993	0.919	2.09778e-264	1	RPS23
NDN	1.79641e-265	0.618593	0.554	0.279	4.60959e-261	1	NDN
RPS13	4.96677e-262	0.376418	0.985	0.871	1.27447e-257	1	RPS13
IGF2.1	8.2649e-257	0.535166	0.263	0.075	2.12077e-252	1	IGF2.1
CALD1	1.85018e-253	0.424002	0.8	0.484	4.74756e-249	1	CALD1
NACA	4.05306e-253	0.409637	0.944	0.797	1.04002e-248	1	NACA
RPL3	1.06916e-252	0.307894	0.993	0.952	2.74346e-248	1	RPL3
FTH1	7.61459e-252	0.344972	0.989	0.932	1.9539e-247	1	FTH1
TMEM98	1.44778e-248	0.581082	0.385	0.152	3.71501e-244	1	TMEM98
SOD3	1.81149e-247	0.613563	0.314	0.107	4.64829e-243	1	SOD3
RPS24	3.29783e-244	0.360795	0.986	0.916	8.46224e-240	1	RPS24
EPHX1	6.03465e-243	0.717254	0.479	0.239	1.54849e-238	1	EPHX1
TSHZ2	3.31057e-239	0.384836	0.56	0.252	8.49492e-235	1	TSHZ2
CD63	4.92983e-238	0.522771	0.903	0.713	1.265e-233	1	CD63
EMP3	7.21583e-238	0.59344	0.522	0.266	1.85158e-233	1	EMP3
ANXA2	1.1613e-234	0.749064	0.523	0.271	2.9799e-230	1	ANXA2
RPLP0	3.66021e-227	0.389719	0.952	0.823	9.3921e-223	1	RPLP0
RPL4	1.01352e-225	0.412448	0.922	0.768	2.60068e-221	1	RPL4
FSTL1	1.15023e-225	0.563122	0.323	0.12	2.9515e-221	1	FSTL1
RPS16	6.68241e-225	0.349454	0.979	0.879	1.71471e-220	1	RPS16
CFH	1.13315e-223	0.598741	0.258	0.082	2.90766e-219	1	CFH
EBF1	1.67311e-223	0.559267	0.251	0.079	4.29319e-219	1	EBF1
MMP23B	4.83522e-222	0.550125	0.318	0.116	1.24072e-217	1	MMP23B
SELENOM	9.64255e-220	0.580949	0.496	0.248	2.47428e-215	1	SELENOM
TCF21	1.05533e-218	0.481896	0.26	0.082	2.70798e-214	1	TCF21
ISLR	6.54497e-218	0.568567	0.352	0.14	1.67944e-213	1	ISLR
RPS4X	8.79677e-218	0.31416	0.988	0.89	2.25725e-213	1	RPS4X
C6orf48	3.38518e-217	0.507456	0.715	0.47	8.68638e-213	1	C6orf48
NPM1	1.09872e-216	0.488146	0.874	0.723	2.81932e-212	1	NPM1
CPE	2.30547e-215	0.551726	0.641	0.372	5.91584e-211	1	CPE
RPS12	2.72125e-215	0.308963	0.987	0.908	6.98272e-211	1	RPS12
MFAP2	1.41717e-210	0.521051	0.273	0.092	3.63646e-206	1	MFAP2
TUBB	4.67316e-205	0.493597	0.76	0.55	1.19913e-200	1	TUBB
FBLN5	6.43861e-205	0.540667	0.319	0.119	1.65215e-200	1	FBLN5
EFEMP2	5.54933e-203	0.535428	0.305	0.116	1.42396e-198	1	EFEMP2
RPS15A	2.47899e-202	0.362324	0.98	0.905	6.3611e-198	1	RPS15A
SLC25A6	1.39236e-200	0.470615	0.795	0.589	3.5728e-196	1	SLC25A6
CIRBP	1.48623e-198	0.406938	0.908	0.756	3.81365e-194	1	CIRBP
JUN	2.36189e-198	0.46795	0.891	0.701	6.0606e-194	1	JUN
SPRY1	3.05549e-191	0.56044	0.27	0.098	7.84039e-187	1	SPRY1
EEF2	6.43411e-191	0.418703	0.842	0.658	1.65099e-186	1	EEF2
PDGFRA	3.8867e-189	0.456883	0.29	0.107	9.97327e-185	1	PDGFRA
RPSA	2.21895e-188	0.351825	0.906	0.746	5.69382e-184	1	RPSA
ACTG1	2.24997e-180	0.348365	0.95	0.813	5.77342e-176	1	ACTG1
BTF3	2.26003e-175	0.376561	0.893	0.725	5.79925e-171	1	BTF3
JUNB	4.27625e-175	0.444085	0.83	0.609	1.09729e-170	1	JUNB
APOE	9.47578e-173	0.450925	0.63	0.38	2.43148e-168	1	APOE
RPS11	3.05035e-169	0.326378	0.942	0.818	7.8272e-165	1	RPS11
RPL30	6.35148e-168	0.304122	0.97	0.887	1.62979e-163	1	RPL30
MXRA8	1.78301e-162	0.429624	0.267	0.103	4.57521e-158	1	MXRA8
IGFBP6	7.9355e-162	0.701748	0.342	0.155	2.03625e-157	1	IGFBP6
RPS20	5.06735e-157	0.279456	0.973	0.869	1.30028e-152	1	RPS20
NBL1	5.12949e-157	0.572877	0.363	0.177	1.31623e-152	1	NBL1
EMILIN1	2.06801e-156	0.366956	0.305	0.126	5.30651e-152	1	EMILIN1
SMOC2	1.00933e-154	0.383296	0.376	0.168	2.58993e-150	1	SMOC2
HNRNPA1	1.23835e-154	0.422464	0.88	0.757	3.17761e-150	1	HNRNPA1
NENF	3.39633e-154	0.449344	0.497	0.29	8.71498e-150	1	NENF
RPL23A	8.5002e-151	0.261974	0.98	0.905	2.18115e-146	1	RPL23A
IGFBP4	2.55785e-149	0.434385	0.605	0.386	6.56345e-145	1	IGFBP4
RPS3	1.2724e-148	0.265575	0.984	0.92	3.26497e-144	1	RPS3
MAFB	6.46617e-146	0.430691	0.295	0.128	1.65922e-141	1	MAFB
TCIM	9.59647e-143	0.358564	0.345	0.16	2.46246e-138	1	TCIM
ABCA81	8.21368e-134	0.519244	0.317	0.151	2.10763e-129	1	ABCA8
RAB34	2.89771e-129	0.455022	0.329	0.165	7.43551e-125	1	RAB34
ITM2B	1.0672e-128	0.373275	0.882	0.753	2.73843e-124	1	ITM2B
SERPINH1	3.07085e-128	0.441336	0.432	0.252	7.87981e-124	1	SERPINH1
RPL35A	3.19416e-128	0.272132	0.979	0.913	8.19622e-124	1	RPL35A
BGN	7.15656e-127	0.381373	0.403	0.206	1.83637e-122	1	BGN
H1FX	3.95289e-126	0.459693	0.5	0.319	1.01431e-121	1	H1FX
LGALS3BP	6.74178e-126	0.451474	0.514	0.322	1.72994e-121	1	LGALS3BP
BNIP3L	2.04766e-125	0.457058	0.504	0.33	5.25429e-121	1	BNIP3L
CRISPLD2	2.78397e-125	0.431701	0.296	0.136	7.14367e-121	1	CRISPLD2
S100A6	8.28951e-121	0.485752	0.574	0.376	2.12709e-116	1	S100A6
FOS	1.28372e-120	0.366966	0.823	0.641	3.29402e-116	1	FOS
RPL22	2.90693e-120	0.307074	0.903	0.786	7.45918e-116	1	RPL22
GSTP1	1.60582e-119	0.371808	0.713	0.537	4.12054e-115	1	GSTP1
C11orf96	3.18435e-118	0.437239	0.508	0.32	8.17104e-114	1	C11orf96
IGFBP7	1.70616e-117	0.474295	0.805	0.642	4.37801e-113	1	IGFBP7
AHNAK	4.20677e-117	0.379128	0.36	0.189	1.07946e-112	1	AHNAK
EIF3L	6.18772e-117	0.417421	0.566	0.397	1.58777e-112	1	EIF3L
RPL34	4.27176e-115	0.266672	0.994	0.949	1.09613e-110	1	RPL34
MARCKS	2.85516e-111	0.419742	0.446	0.275	7.32634e-107	1	MARCKS
TCEAL4	5.00771e-111	0.337335	0.687	0.506	1.28498e-106	1	TCEAL4
EIF3E	2.47262e-110	0.363129	0.686	0.53	6.34475e-106	1	EIF3E
RPL27	2.96537e-110	0.290701	0.909	0.798	7.60914e-106	1	RPL27
LGALS3	7.03128e-108	0.608128	0.392	0.238	1.80423e-103	1	LGALS3
PTGDS	1.73901e-107	0.778123	0.746	0.663	4.46231e-103	1	PTGDS
ZFP36L2	3.0536e-106	0.35505	0.606	0.422	7.83553e-102	1	ZFP36L2
PRDX2	6.29218e-105	0.362744	0.556	0.383	1.61457e-100	1	PRDX2
MFGE8	5.7861e-103	0.370865	0.359	0.203	1.48471e-98	1	MFGE8
ANXA5	7.51825e-102	0.387319	0.492	0.325	1.92918e-97	1	ANXA5
RPS26	6.58426e-101	0.269788	0.892	0.753	1.68952e-96	1	RPS26
EIF3F	6.93983e-101	0.386907	0.54	0.384	1.78076e-96	1	EIF3F
COL15A1	1.09654e-100	0.345831	0.402	0.226	2.81373e-96	1	COL15A1
DDAH2	3.78925e-99	0.429203	0.321	0.177	9.72323e-95	1	DDAH2
PLD3	9.9155e-96	0.387678	0.451	0.297	2.54432e-91	1	PLD3
CEBPD	4.00961e-95	0.409044	0.354	0.203	1.02887e-90	1	CEBPD
FHL2	4.60258e-95	0.305277	0.352	0.187	1.18102e-90	1	FHL2
FXYD6	2.51724e-94	0.364342	0.543	0.375	6.45924e-90	1	FXYD6
ZFAS1	1.28363e-90	0.339693	0.592	0.436	3.2938e-86	1	ZFAS1
PTMS	2.98815e-90	0.296213	0.642	0.469	7.66759e-86	1	PTMS
SSR2	1.41187e-87	0.329417	0.585	0.433	3.62286e-83	1	SSR2
TMEM59	4.52921e-87	0.327927	0.602	0.454	1.1622e-82	1	TMEM59
PPIB	4.48156e-86	0.298995	0.678	0.52	1.14997e-81	1	PPIB
KLF4	4.83809e-86	0.431923	0.337	0.199	1.24145e-81	1	KLF4
SPATS2L	5.09993e-86	0.378313	0.306	0.173	1.30864e-81	1	SPATS2L
ZFP36	1.1217e-85	0.275156	0.573	0.398	2.87828e-81	1	ZFP36
RCN1	1.96041e-85	0.379969	0.267	0.143	5.03041e-81	1	RCN1
LY6E	1.11222e-81	0.279597	0.597	0.433	2.85397e-77	1	LY6E
GADD45B	2.08211e-78	0.335223	0.509	0.35	5.34269e-74	1	GADD45B
CLEC11A	2.76618e-78	0.332678	0.261	0.139	7.09802e-74	1	CLEC11A
NOP53	7.22431e-78	0.288956	0.669	0.515	1.85376e-73	1	NOP53
IMPDH2	1.16119e-75	0.393802	0.378	0.25	2.97961e-71	1	IMPDH2
C12orf57	1.4495e-75	0.304847	0.54	0.4	3.71942e-71	1	C12orf57
EEF1B2	2.32521e-75	0.279748	0.761	0.636	5.96648e-71	1	EEF1B2
ZFP36L1	2.03287e-74	0.253303	0.647	0.485	5.21635e-70	1	ZFP36L1
SERPINF11	1.76553e-73	0.339178	0.716	0.539	4.53035e-69	1	SERPINF1
CTSF	2.07587e-73	0.372568	0.262	0.147	5.32669e-69	1	CTSF
GSTM3	5.169e-73	0.341572	0.577	0.43	1.32637e-68	1	GSTM3
CNBP	2.78818e-70	0.284941	0.611	0.476	7.15448e-66	1	CNBP
KDELR2	4.40501e-70	0.326459	0.412	0.283	1.13033e-65	1	KDELR2
TSPAN4	6.30534e-69	0.377612	0.284	0.169	1.61795e-64	1	TSPAN4
NPC2	6.95397e-68	0.299131	0.555	0.427	1.78439e-63	1	NPC2
CNN3	3.65965e-66	0.299609	0.414	0.282	9.39065e-62	1	CNN3
ALDH1A11	5.01351e-65	0.324438	0.464	0.324	1.28647e-60	1	ALDH1A1
HSP90B1	3.2566e-64	0.264833	0.628	0.486	8.35642e-60	1	HSP90B1
HMGN2	1.55001e-61	0.258944	0.641	0.515	3.97733e-57	1	HMGN2
RBM3	1.96298e-61	0.256039	0.627	0.501	5.037e-57	1	RBM3
EMP2	2.51614e-61	0.308634	0.298	0.183	6.45643e-57	1	EMP2
ESD	3.57834e-59	0.307066	0.454	0.336	9.18202e-55	1	ESD
LRP1	1.19308e-57	0.260244	0.271	0.16	3.06145e-53	1	LRP1
CITED2	3.17553e-56	0.360491	0.295	0.189	8.14841e-52	1	CITED2
QSOX1	1.16163e-53	0.337614	0.278	0.177	2.98075e-49	1	QSOX1
TSC22D3	1.23573e-53	0.279612	0.317	0.204	3.17087e-49	1	TSC22D3
OSTC	9.70389e-53	0.283207	0.438	0.327	2.49002e-48	1	OSTC
EIF3H	1.33468e-52	0.267722	0.54	0.427	3.42479e-48	1	EIF3H
SELENOF	3.61447e-52	0.282246	0.382	0.274	9.27473e-48	1	SELENOF
NME4	4.70333e-51	0.299339	0.303	0.2	1.20688e-46	1	NME4
NFIA	4.91121e-50	0.251937	0.402	0.289	1.26022e-45	1	NFIA
CAVIN3	2.8613e-47	0.269416	0.3	0.198	7.34209e-43	1	CAVIN3
KDELR1	2.90286e-47	0.297812	0.382	0.281	7.44873e-43	1	KDELR1
LEPROT	5.72338e-47	0.282932	0.374	0.271	1.46862e-42	1	LEPROT
PGRMC1	6.25131e-47	0.253835	0.419	0.309	1.60409e-42	1	PGRMC1
ITM2C	2.1952e-45	0.269175	0.317	0.214	5.63288e-41	1	ITM2C
RSL1D1	1.18772e-44	0.255375	0.431	0.328	3.04769e-40	1	RSL1D1
LDHA	7.66065e-44	0.251338	0.442	0.336	1.96572e-39	1	LDHA
SQSTM1	1.06535e-41	0.29689	0.403	0.309	2.73368e-37	1	SQSTM1
PRPS2	3.18838e-41	0.365642	0.297	0.206	8.18137e-37	1	PRPS2
GCSH	4.45e-41	0.267135	0.273	0.183	1.14187e-36	1	GCSH
NFIC	1.97731e-40	0.25468	0.362	0.268	5.07378e-36	1	NFIC
ATRAID	1.51873e-39	0.260863	0.41	0.319	3.89706e-35	1	ATRAID
GINM1	2.50933e-39	0.261431	0.262	0.177	6.43894e-35	1	GINM1
IRF1	1.49902e-37	0.260482	0.311	0.217	3.84647e-33	1	IRF1
SYNGR1	1.8412e-36	0.27849	0.261	0.178	4.72452e-32	1	SYNGR1
CST3	6.01162e-35	0.265368	0.772	0.702	1.54258e-30	1	CST3
REXO2	1.23212e-33	0.34344	0.341	0.266	3.16162e-29	1	REXO2
AP3S1	5.77862e-32	0.252004	0.329	0.249	1.48279e-27	1	AP3S1
BEX11	6.55139e-177	0.703127	0.615	0.413	1.68109e-172	2	BEX1
COPE1	1.11494e-142	0.652275	0.677	0.556	2.86095e-138	2	COPE
DYNLL1	1.75768e-138	0.436584	0.811	0.745	4.5102e-134	2	DYNLL1
STMN11	1.59062e-115	0.509859	0.631	0.484	4.08153e-111	2	STMN1
GSTA11	2.46362e-113	0.562392	0.525	0.36	6.32166e-109	2	GSTA1
CITED11	2.19745e-111	0.642113	0.458	0.294	5.63865e-107	2	CITED1
APOA11	9.82142e-107	0.495046	0.679	0.545	2.52018e-102	2	APOA1
HPRT11	5.10309e-96	0.615855	0.386	0.241	1.30945e-91	2	HPRT1
C4orf481	1.11827e-89	0.536373	0.467	0.317	2.86949e-85	2	C4orf48
FATE11	1.61065e-88	0.64806	0.391	0.249	4.13292e-84	2	FATE1
MLF1	6.20298e-75	0.793112	0.268	0.152	1.59168e-70	2	MLF1
CKB1	6.74298e-75	0.438471	0.583	0.459	1.73025e-70	2	CKB
AMH1	1.12057e-74	0.302227	0.555	0.381	2.87538e-70	2	AMH
UBB	4.22032e-70	0.294341	0.835	0.8	1.08293e-65	2	UBB
GATM1	3.4656e-69	0.49735	0.356	0.227	8.89272e-65	2	GATM
MIR202HG1	1.06944e-66	0.31306	0.491	0.347	2.74418e-62	2	MIR202HG
CTSV1	2.79931e-62	0.404356	0.394	0.261	7.18304e-58	2	CTSV
SPINT21	9.94091e-62	0.552056	0.359	0.244	2.55084e-57	2	SPINT2
INHA1	3.7716e-59	0.362813	0.427	0.29	9.67793e-55	2	INHA
RNASE11	3.08651e-57	0.406466	0.628	0.563	7.91998e-53	2	RNASE1
SKP1	2.78275e-56	0.301959	0.756	0.743	7.14053e-52	2	SKP1
HERC51	3.23132e-56	0.506683	0.344	0.233	8.29158e-52	2	HERC5
MYL6B1	3.13179e-53	0.521076	0.432	0.338	8.03617e-49	2	MYL6B
HMGN51	4.4616e-53	0.605082	0.353	0.251	1.14485e-48	2	HMGN5
TNNI31	1.14112e-52	0.473026	0.293	0.187	2.9281e-48	2	TNNI3
MT-CO31	1.52577e-50	0.253073	0.946	0.983	3.91511e-46	2	MT-CO3
DDX241	3.28387e-50	0.394112	0.56	0.481	8.42642e-46	2	DDX24
REEP61	4.28349e-48	0.460967	0.359	0.256	1.09914e-43	2	REEP6
BEX31	1.5545e-47	0.367831	0.687	0.698	3.98885e-43	2	BEX3
PEBP11	2.86414e-47	0.339551	0.664	0.638	7.34937e-43	2	PEBP1
PPIF1	3.06703e-46	0.430818	0.258	0.163	7.86999e-42	2	PPIF
TCEAL21	5.02926e-46	0.50946	0.262	0.171	1.29051e-41	2	TCEAL2
SRSF91	5.48495e-46	0.404392	0.525	0.457	1.40744e-41	2	SRSF9
TMEM971	1.58812e-45	0.406493	0.333	0.231	4.0751e-41	2	TMEM97
PRDX61	7.49416e-45	0.440812	0.605	0.597	1.923e-40	2	PRDX6
TSTD11	3.35371e-43	0.438269	0.263	0.172	8.60561e-39	2	TSTD1
CALM2	2.14651e-42	0.294965	0.758	0.77	5.50794e-38	2	CALM2
CLU1	8.42645e-41	0.27899	0.538	0.442	2.16223e-36	2	CLU
BEX21	5.41884e-39	0.431763	0.293	0.206	1.39047e-34	2	BEX2
MGST31	7.72216e-39	0.360468	0.631	0.631	1.98151e-34	2	MGST3
JPT1	2.92198e-38	0.406761	0.285	0.2	7.49779e-34	2	JPT1
SMIM11	2.36726e-36	0.4335	0.26	0.178	6.0744e-32	2	SMIM1
TCEAL51	1.92277e-33	0.406286	0.257	0.177	4.93383e-29	2	TCEAL5
FDXR1	8.73634e-33	0.390504	0.285	0.205	2.24174e-28	2	FDXR
DYNLT1	1.13502e-32	0.380828	0.437	0.373	2.91245e-28	2	DYNLT1
CKS2	4.50135e-31	0.385492	0.279	0.2	1.15505e-26	2	CKS2
ABRACL1	1.98349e-30	0.389317	0.283	0.208	5.08962e-26	2	ABRACL
GSTM31	4.58754e-29	0.379594	0.498	0.44	1.17716e-24	2	GSTM3
G6PD1	1.08662e-28	0.34301	0.318	0.239	2.78828e-24	2	G6PD
IFI27L11	3.81995e-28	0.367811	0.346	0.275	9.80198e-24	2	IFI27L1
BTG3	2.99269e-26	0.406302	0.252	0.186	7.67924e-22	2	BTG3
MORF4L1	5.44169e-26	0.295869	0.619	0.615	1.39634e-21	2	MORF4L1
ENO11	2.06034e-25	0.332477	0.519	0.483	5.28683e-21	2	ENO1
RPA2	2.77486e-25	0.387096	0.252	0.188	7.12029e-21	2	RPA2
HLTF1	6.97788e-25	0.349639	0.27	0.201	1.79052e-20	2	HLTF
ATP5F1E	1.12473e-24	0.261896	0.665	0.674	2.88605e-20	2	ATP5F1E
PAIP2	2.04282e-24	0.360702	0.431	0.383	5.24187e-20	2	PAIP2
MARCKSL11	1.23233e-23	0.303506	0.638	0.668	3.16217e-19	2	MARCKSL1
UQCRH	4.59816e-23	0.301762	0.565	0.552	1.17989e-18	2	UQCRH
UBE2N	1.01395e-22	0.641025	0.286	0.229	2.60179e-18	2	UBE2N
SUSD31	1.71156e-22	0.351473	0.259	0.194	4.39187e-18	2	SUSD3
TMEM258	3.87611e-22	0.299697	0.505	0.468	9.94609e-18	2	TMEM258
DRAP1	6.05894e-22	0.334568	0.455	0.413	1.55472e-17	2	DRAP1
RTRAF	1.07206e-21	0.324401	0.476	0.44	2.75092e-17	2	RTRAF
PLA2G161	1.35454e-21	0.360798	0.294	0.234	3.47576e-17	2	PLA2G16
ECH11	2.41313e-21	0.339953	0.408	0.36	6.19208e-17	2	ECH1
BUD23	3.9135e-21	0.571789	0.303	0.252	1.0042e-16	2	BUD23
RAN	5.15389e-21	0.323755	0.501	0.474	1.32249e-16	2	RAN
ELOB	2.23822e-20	0.261956	0.584	0.569	5.74326e-16	2	ELOB
NDUFB9	6.08557e-20	0.322924	0.465	0.434	1.56156e-15	2	NDUFB9
ARPP19	4.90413e-19	0.337859	0.311	0.258	1.2584e-14	2	ARPP19
AURKAIP1	5.46859e-19	0.370994	0.34	0.293	1.40324e-14	2	AURKAIP1
YWHAE	8.07797e-19	0.296913	0.519	0.497	2.07281e-14	2	YWHAE
S100A131	4.0441e-18	0.393709	0.444	0.421	1.03772e-13	2	S100A13
ZFAND61	4.24173e-17	0.3195	0.338	0.29	1.08843e-12	2	ZFAND6
RBBP71	1.38975e-16	0.253579	0.475	0.437	3.5661e-12	2	RBBP7
SEM1	1.42652e-16	0.259596	0.514	0.499	3.66045e-12	2	SEM1
PRDX4	2.05846e-15	0.349601	0.415	0.387	5.282e-11	2	PRDX4
ISYNA11	6.83899e-14	0.317833	0.361	0.326	1.75489e-09	2	ISYNA1
UQCR10	1.31161e-13	0.299287	0.446	0.431	3.36558e-09	2	UQCR10
TIMM8B	7.42239e-13	0.297996	0.295	0.259	1.90459e-08	2	TIMM8B
ISCU	8.55647e-13	0.268721	0.399	0.37	2.19559e-08	2	ISCU
ATP5MD1	3.46343e-12	0.312728	0.457	0.457	8.88716e-08	2	ATP5MD
CAMTA11	4.84548e-12	0.286492	0.333	0.302	1.24335e-07	2	CAMTA1
GSTA41	4.98695e-12	0.276115	0.257	0.215	1.27965e-07	2	GSTA4
NDUFA2	2.424e-11	0.270795	0.359	0.328	6.21999e-07	2	NDUFA2
EIF1B	5.42564e-11	0.319297	0.356	0.328	1.39222e-06	2	EIF1B
MRPL161	6.17539e-11	0.292458	0.253	0.216	1.5846e-06	2	MRPL16
FAM96B	9.76062e-11	0.263493	0.352	0.323	2.50458e-06	2	FAM96B
PFDN2	1.2589e-10	0.253248	0.342	0.31	3.23033e-06	2	PFDN2
EIF5B	2.55987e-10	0.331605	0.336	0.31	6.56862e-06	2	EIF5B
DDOST	3.72047e-10	0.404739	0.296	0.271	9.54673e-06	2	DDOST
CCT2	4.16464e-10	0.285165	0.305	0.272	1.06865e-05	2	CCT2
POLR2F1	4.45366e-10	0.25445	0.36	0.335	1.14281e-05	2	POLR2F
RANBP1	5.31562e-10	0.271152	0.398	0.378	1.36399e-05	2	RANBP1
MPC2	9.27391e-10	0.35437	0.258	0.228	2.37969e-05	2	MPC2
SELENOH	1.20095e-09	0.252267	0.353	0.33	3.08163e-05	2	SELENOH
TUBB4B	2.30749e-09	0.251494	0.417	0.397	5.92103e-05	2	TUBB4B
COX5A	3.72673e-09	0.255226	0.297	0.268	9.56279e-05	2	COX5A
TXNDC17	3.74013e-09	0.283926	0.265	0.234	9.59717e-05	2	TXNDC17
UBE2B	6.07951e-09	0.271588	0.331	0.31	0.000156	2	UBE2B
HIGD2A1	1.5999e-08	0.291048	0.342	0.325	0.000410533	2	HIGD2A
SMC3	1.83818e-08	0.594867	0.275	0.257	0.000471677	2	SMC3
SPCS1	4.09544e-08	0.33033	0.423	0.435	0.00105089	2	SPCS1
SNRPN	6.62471e-08	0.301802	0.253	0.228	0.0016999	2	SNRPN
NDUFB5	7.33909e-08	0.274705	0.309	0.288	0.00188321	2	NDUFB5
NDUFB6	9.28059e-08	0.277974	0.296	0.275	0.0023814	2	NDUFB6
GTF2A2	1.08167e-07	0.273115	0.302	0.281	0.00277556	2	GTF2A2
ALDH1A12	1.31936e-07	0.286672	0.354	0.337	0.00338549	2	ALDH1A1
ATP6V0B	1.61175e-07	0.293065	0.283	0.263	0.00413575	2	ATP6V0B
PTGES3	1.90057e-07	0.262267	0.44	0.444	0.00487687	2	PTGES3
ANAPC11	2.03017e-07	0.254753	0.36	0.347	0.00520941	2	ANAPC11
BEX41	1.01887e-06	0.256079	0.285	0.264	0.0261442	2	BEX4
UQCRFS1	1.91475e-06	0.264337	0.286	0.269	0.0491324	2	UQCRFS1
ROMO1	3.6849e-06	0.259444	0.312	0.296	0.0945545	2	ROMO1
ILF2	7.71836e-06	0.273703	0.273	0.258	0.198053	2	ILF2
TAX1BP1	8.73293e-06	0.265428	0.306	0.295	0.224087	2	TAX1BP1
XRCC6	8.9844e-06	0.289973	0.333	0.325	0.23054	2	XRCC6
SNRPB	2.94312e-05	0.25412	0.367	0.367	0.755203	2	SNRPB
POLR2L	6.69929e-05	0.25656	0.389	0.396	1	2	POLR2L
BZW1	6.80333e-05	0.298809	0.276	0.265	1	2	BZW1
MIF	0.00271706	0.256476	0.391	0.408	1	2	MIF
CCT3	0.003717	0.254279	0.301	0.303	1	2	CCT3
GPX4	0.00431954	0.768075	0.402	0.422	1	2	GPX4
LMAN2	0.00997255	0.28272	0.253	0.254	1	2	LMAN2
TSHZ21	0	1.19313	0.652	0.253	0	3	TSHZ2
MEG31	0	1.15414	0.762	0.311	0	3	MEG3
COL1A11	0	1.13277	0.688	0.298	0	3	COL1A1
COL15A11	0	1.12202	0.527	0.221	0	3	COL15A1
COL3A11	0	1.04309	0.568	0.238	0	3	COL3A1
LTBP41	0	1.02466	0.601	0.263	0	3	LTBP4
MALAT1	0	0.746299	0.999	0.964	0	3	MALAT1
AEBP1	5.64742e-266	1.04309	0.391	0.138	1.44913e-261	3	AEBP1
CALD11	6.5314e-256	0.908247	0.71	0.5	1.67596e-251	3	CALD1
MYH11	2.4894e-251	1.21649	0.36	0.122	6.3878e-247	3	MYH11
PDGFRB	1.49389e-249	1.06271	0.351	0.119	3.83331e-245	3	PDGFRB
DCN1	5.47422e-227	0.421965	0.693	0.34	1.40469e-222	3	DCN
ACTA2	1.96539e-222	0.874937	0.45	0.185	5.04319e-218	3	ACTA2
NR2F21	1.01846e-219	0.792458	0.585	0.316	2.61336e-215	3	NR2F2
PLAC91	2.47358e-216	0.862591	0.505	0.244	6.34722e-212	3	PLAC9
MMP21	4.66955e-216	0.861796	0.483	0.227	1.19821e-211	3	MMP2
ENG	1.56761e-212	0.846997	0.572	0.318	4.0225e-208	3	ENG
LAMC3	2.04886e-206	0.875184	0.276	0.087	5.25739e-202	3	LAMC3
PTCH1	3.83761e-197	0.978825	0.337	0.13	9.8473e-193	3	PTCH1
CRISPLD21	9.02464e-194	0.889619	0.346	0.137	2.31572e-189	3	CRISPLD2
EMILIN11	6.45615e-190	0.896356	0.332	0.129	1.65665e-185	3	EMILIN1
COL6A21	2.10736e-188	0.803649	0.537	0.294	5.40748e-184	3	COL6A2
SMOC21	2.03417e-183	0.81856	0.395	0.172	5.21968e-179	3	SMOC2
OSR21	7.30648e-175	0.733398	0.463	0.225	1.87484e-170	3	OSR2
PTGDS1	1.71713e-172	1.08521	0.751	0.665	4.40615e-168	3	PTGDS
DPEP1	9.16425e-170	0.749205	0.4	0.179	2.35155e-165	3	DPEP1
KCNMB1	6.01631e-165	0.875156	0.281	0.104	1.54378e-160	3	KCNMB1
APOE1	9.43621e-163	0.846527	0.596	0.39	2.42133e-158	3	APOE
PDGFRA1	6.84007e-155	0.804655	0.288	0.112	1.75516e-150	3	PDGFRA
TPM2	5.32433e-139	0.783485	0.486	0.292	1.36622e-134	3	TPM2
C1S1	2.62351e-138	0.678799	0.428	0.221	6.73193e-134	3	C1S
BGN1	1.92998e-135	0.736703	0.412	0.211	4.95232e-131	3	BGN
COL6A11	2.69479e-126	0.781503	0.384	0.201	6.91483e-122	3	COL6A1
TIMP11	5.05967e-121	0.58991	0.681	0.562	1.29831e-116	3	TIMP1
MATN2	1.64663e-116	0.733098	0.352	0.18	4.22525e-112	3	MATN2
F3	2.23343e-113	0.683727	0.261	0.112	5.73098e-109	3	F3
WFDC1	4.21941e-112	0.623805	0.279	0.122	1.0827e-107	3	WFDC1
COL1A22	4.23634e-109	0.548873	0.688	0.524	1.08705e-104	3	COL1A2
IGFBP61	2.68143e-105	0.719833	0.325	0.162	6.88054e-101	3	IGFBP6
FHL21	1.66835e-95	0.621254	0.355	0.191	4.28099e-91	3	FHL2
PLPP31	4.54708e-93	0.677527	0.302	0.156	1.16678e-88	3	PLPP3
TNS1	8.04349e-92	0.660005	0.282	0.141	2.06396e-87	3	TNS1
TAGLN	1.35519e-88	0.480586	0.288	0.138	3.47741e-84	3	TAGLN
FBLN51	3.45906e-86	0.604893	0.268	0.129	8.87594e-82	3	FBLN5
SPTBN1	1.42182e-78	0.676816	0.414	0.282	3.64838e-74	3	SPTBN1
AHNAK1	1.67601e-73	0.654777	0.331	0.196	4.30064e-69	3	AHNAK
TIMP3	3.21904e-72	0.612092	0.447	0.308	8.26005e-68	3	TIMP3
PTN1	2.02463e-55	0.528819	0.286	0.171	5.1952e-51	3	PTN
TPM1	3.67018e-55	0.562934	0.367	0.254	9.41767e-51	3	TPM1
MYLK	9.64797e-55	0.588558	0.297	0.185	2.47567e-50	3	MYLK
ABLIM1	6.92959e-54	0.526194	0.264	0.156	1.77813e-49	3	ABLIM1
C71	1.29409e-53	0.619853	0.283	0.168	3.32062e-49	3	C7
MFAP41	9.01558e-53	0.457276	0.266	0.153	2.3134e-48	3	MFAP4
TCEAL41	1.37262e-52	0.478841	0.568	0.521	3.52215e-48	3	TCEAL4
SSPN1	4.01473e-50	0.489606	0.286	0.178	1.03018e-45	3	SSPN
IGFBP71	5.29608e-50	0.499661	0.683	0.657	1.35898e-45	3	IGFBP7
DLK11	2.04097e-47	0.385028	0.362	0.237	5.23712e-43	3	DLK1
KCNQ1OT1	7.51703e-45	0.677669	0.359	0.267	1.92887e-40	3	KCNQ1OT1
SVIL	4.19097e-43	0.524976	0.254	0.161	1.0754e-38	3	SVIL
IGFBP51	2.41146e-42	0.422077	0.251	0.151	6.18781e-38	3	IGFBP5
FLNA	3.04983e-42	0.558901	0.309	0.214	7.82586e-38	3	FLNA
C11orf961	6.37371e-41	0.387903	0.436	0.331	1.63549e-36	3	C11orf96
LRP11	1.65243e-40	0.552313	0.254	0.165	4.24015e-36	3	LRP1
NBL11	1.45655e-34	0.429872	0.279	0.19	3.73751e-30	3	NBL1
C1R1	1.52886e-33	0.36493	0.293	0.199	3.92306e-29	3	C1R
TIMP2	8.22248e-32	0.520365	0.421	0.362	2.10989e-27	3	TIMP2
TCEAL1	7.25676e-30	0.483777	0.272	0.194	1.86208e-25	3	TCEAL1
PTMS1	4.90004e-29	0.377655	0.523	0.484	1.25735e-24	3	PTMS
N4BP2L21	4.01058e-27	0.389888	0.53	0.5	1.02912e-22	3	N4BP2L2
GOLGB1	1.63646e-24	0.431638	0.265	0.198	4.19915e-20	3	GOLGB1
LUC7L31	3.40853e-24	0.42713	0.443	0.4	8.74629e-20	3	LUC7L3
SLF21	8.53394e-24	0.481187	0.286	0.22	2.18981e-19	3	SLF2
RARRES21	1.86979e-23	0.331303	0.299	0.223	4.79789e-19	3	RARRES2
CPE1	4.69645e-21	0.342536	0.44	0.397	1.20511e-16	3	CPE
PNISR	6.14024e-21	0.366911	0.512	0.501	1.57558e-16	3	PNISR
TTC3	1.41827e-16	0.361696	0.381	0.346	3.63928e-12	3	TTC3
MYL9	2.29446e-16	0.317476	0.471	0.464	5.88758e-12	3	MYL9
PMP221	1.62596e-15	0.288425	0.251	0.194	4.1722e-11	3	PMP22
ITGB1	7.68172e-14	0.389991	0.384	0.363	1.97113e-09	3	ITGB1
NUPR1	2.05595e-11	0.300004	0.432	0.421	5.27557e-07	3	NUPR1
SELENOM1	2.31207e-11	0.254379	0.313	0.27	5.93277e-07	3	SELENOM
MDK1	2.84674e-11	0.345415	0.294	0.25	7.30474e-07	3	MDK
C6orf481	3.21739e-10	0.250962	0.494	0.496	8.25583e-06	3	C6orf48
GABPB1-AS1	6.50128e-10	0.43219	0.283	0.254	1.66823e-05	3	GABPB1-AS1
NUCKS1	7.07567e-10	0.305708	0.486	0.515	1.81562e-05	3	NUCKS1
MAP1B1	1.84965e-09	0.30483	0.26	0.225	4.74621e-05	3	MAP1B
RASD1	3.48261e-09	0.336994	0.255	0.217	8.93639e-05	3	RASD1
NFIA1	2.22069e-08	0.355505	0.318	0.299	0.00056983	3	NFIA
EMP31	1.49416e-07	0.301069	0.312	0.291	0.00383402	3	EMP3
ATRX	3.36453e-06	0.291599	0.31	0.297	0.0863339	3	ATRX
NFIC1	1.37117e-05	0.315046	0.287	0.277	0.351842	3	NFIC
DDX171	3.29635e-05	0.251981	0.434	0.45	0.845843	3	DDX17
TPM4	0.00278915	0.259197	0.323	0.331	1	3	TPM4
PHF14	0.00416315	0.309042	0.282	0.285	1	3	PHF14
RPL61	0	0.646405	0.962	0.827	0	4	RPL6
RPS81	0	0.602367	0.989	0.922	0	4	RPS8
RPL71	0	0.592262	0.986	0.912	0	4	RPL7
RPL10A1	0	0.563416	0.973	0.853	0	4	RPL10A
RPS241	0	0.559115	0.989	0.918	0	4	RPS24
RPS3A1	0	0.549548	0.989	0.92	0	4	RPS3A
RPL131	0	0.541807	0.997	0.955	0	4	RPL13
RPL101	0	0.518617	0.995	0.936	0	4	RPL10
RPL13A1	0	0.514209	0.996	0.956	0	4	RPL13A
RPS231	0	0.509488	0.989	0.921	0	4	RPS23
RPS27A1	0	0.498999	0.993	0.94	0	4	RPS27A
RPL151	0	0.478435	0.987	0.925	0	4	RPL15
RPS181	0	0.469444	0.999	0.967	0	4	RPS18
RPS15A1	4.97319e-306	0.567025	0.986	0.907	1.27612e-301	4	RPS15A
RPS71	2.11292e-304	0.519576	0.965	0.859	5.42176e-300	4	RPS7
RPL91	4.92169e-301	0.463612	0.987	0.903	1.26291e-296	4	RPL9
RPL51	2.0384e-299	0.484552	0.969	0.878	5.23052e-295	4	RPL5
RPL121	2.16269e-293	0.485283	0.978	0.877	5.54947e-289	4	RPL12
RPS19	4.01316e-273	0.454124	0.989	0.942	1.02978e-268	4	RPS19
RPS121	1.112e-268	0.4431	0.99	0.91	2.8534e-264	4	RPS12
RPL211	1.43033e-267	0.453682	0.994	0.938	3.67024e-263	4	RPL21
EEF1A11	1.69213e-267	0.417406	0.992	0.96	4.34201e-263	4	EEF1A1
RPS4X1	3.47612e-267	0.421864	0.984	0.894	8.91973e-263	4	RPS4X
RPL301	4.39726e-258	0.497805	0.979	0.888	1.12834e-253	4	RPL30
RPL341	2.26127e-257	0.531844	0.995	0.95	5.80242e-253	4	RPL34
RPL291	2.10317e-255	0.475186	0.976	0.862	5.39674e-251	4	RPL29
RPL181	4.56347e-255	0.428338	0.983	0.899	1.17099e-250	4	RPL18
RPL35A1	2.77066e-253	0.48469	0.987	0.914	7.10952e-249	4	RPL35A
RPLP1	1.84821e-252	0.387358	0.997	0.966	4.74252e-248	4	RPLP1
RPL18A1	8.53411e-251	0.441531	0.986	0.907	2.18985e-246	4	RPL18A
RPL41	1.42735e-248	0.449382	0.997	0.957	3.66258e-244	4	RPL41
RPS131	7.72635e-246	0.472086	0.978	0.875	1.98258e-241	4	RPS13
RPL7A1	2.67608e-244	0.438069	0.972	0.871	6.86681e-240	4	RPL7A
RPL32	5.69436e-244	0.420883	0.993	0.948	1.46117e-239	4	RPL32
RPS15	4.67678e-243	0.39827	0.99	0.927	1.20006e-238	4	RPS15
RPL111	1.97125e-237	0.3962	0.989	0.931	5.05822e-233	4	RPL11
RPL33	8.5145e-230	0.341846	0.997	0.953	2.18482e-225	4	RPL3
RPS161	1.20694e-228	0.437681	0.975	0.882	3.09701e-224	4	RPS16
RPL241	3.34529e-226	0.458328	0.949	0.821	8.58403e-222	4	RPL24
RPS6	2.19695e-221	0.368282	0.987	0.927	5.63738e-217	4	RPS6
PLAC92	1.66574e-220	0.588958	0.545	0.241	4.27428e-216	4	PLAC9
RPL23A1	4.88511e-210	0.393482	0.987	0.907	1.25352e-205	4	RPL23A
RPS91	5.08852e-208	0.385814	0.975	0.891	1.30571e-203	4	RPS9
RACK11	2.75393e-206	0.440834	0.952	0.819	7.06659e-202	4	RACK1
RPS14	2.09536e-200	0.353301	0.988	0.925	5.37669e-196	4	RPS14
TSHZ22	8.17717e-200	0.512807	0.562	0.26	2.09826e-195	4	TSHZ2
RPS201	3.21396e-197	0.413107	0.967	0.872	8.24703e-193	4	RPS20
RPL31	2.07717e-194	0.472132	0.973	0.886	5.33003e-190	4	RPL31
RPL42	5.20315e-192	0.461447	0.908	0.774	1.33513e-187	4	RPL4
RPL27A	9.90447e-192	0.388978	0.973	0.9	2.54149e-187	4	RPL27A
RPS21	1.04688e-191	0.396385	0.992	0.931	2.68628e-187	4	RPS2
RPS51	2.72488e-189	0.445745	0.945	0.825	6.99204e-185	4	RPS5
NACA1	4.6872e-189	0.409849	0.929	0.803	1.20274e-184	4	NACA
RPL39	2.52503e-188	0.537699	0.976	0.893	6.47923e-184	4	RPL39
RPL191	2.84817e-188	0.34725	0.985	0.913	7.30842e-184	4	RPL19
RPL271	4.86047e-186	0.449051	0.93	0.799	1.2472e-181	4	RPL27
APOE2	2.41093e-183	0.991646	0.637	0.387	6.18643e-179	4	APOE
RPL81	3.11138e-179	0.363586	0.979	0.901	7.98379e-175	4	RPL8
RPL26	6.71181e-179	0.40365	0.967	0.882	1.72225e-174	4	RPL26
OSR22	7.08496e-177	0.631952	0.482	0.223	1.818e-172	4	OSR2
RPLP01	5.05867e-174	0.441276	0.943	0.827	1.29805e-169	4	RPLP0
BGN2	1.4509e-172	0.563382	0.458	0.207	3.72302e-168	4	BGN
MDK2	6.47907e-172	0.79244	0.469	0.235	1.66253e-167	4	MDK
RPL23	2.23804e-168	0.404456	0.944	0.82	5.74281e-164	4	RPL23
RPS25	6.51799e-167	0.380282	0.972	0.9	1.67252e-162	4	RPS25
MEG32	1.59631e-161	0.350712	0.632	0.322	4.09614e-157	4	MEG3
RPL221	3.79893e-161	0.438967	0.922	0.788	9.74806e-157	4	RPL22
RPL37	9.79188e-152	0.44175	0.964	0.86	2.5126e-147	4	RPL37
MFAP42	1.01898e-151	0.517076	0.354	0.146	2.6147e-147	4	MFAP4
RPS111	8.58777e-151	0.385723	0.94	0.821	2.20362e-146	4	RPS11
RPL37A	3.67999e-146	0.383196	0.974	0.91	9.44286e-142	4	RPL37A
TIMP12	4.88348e-144	0.571007	0.748	0.557	1.2531e-139	4	TIMP1
RPS27	2.81221e-142	0.371724	0.986	0.949	7.21613e-138	4	RPS27
C6orf482	7.9617e-139	0.509571	0.688	0.479	2.04297e-134	4	C6orf48
RPL35	1.01105e-137	0.35811	0.967	0.885	2.59436e-133	4	RPL35
NPM11	2.47308e-136	0.448751	0.864	0.728	6.34593e-132	4	NPM1
RPL36	2.54204e-135	0.390126	0.97	0.894	6.52286e-131	4	RPL36
RPS31	5.12894e-135	0.313121	0.99	0.921	1.31609e-130	4	RPS3
FTH11	3.76813e-130	0.250388	0.989	0.934	9.66902e-126	4	FTH1
RPS261	9.05453e-127	0.375477	0.892	0.757	2.32339e-122	4	RPS26
BTF31	3.87697e-117	0.35268	0.882	0.731	9.9483e-113	4	BTF3
LHX91	8.76514e-117	0.499083	0.272	0.111	2.24913e-112	4	LHX9
NR2F22	4.12792e-114	0.399075	0.554	0.319	1.05922e-109	4	NR2F2
COL3A12	5.57798e-114	0.314213	0.479	0.245	1.43131e-109	4	COL3A1
MMP22	5.83799e-113	0.365583	0.451	0.23	1.49803e-108	4	MMP2
RPLP2	1.59681e-109	0.29294	0.988	0.943	4.09741e-105	4	RPLP2
HNRNPA11	2.32146e-109	0.393845	0.875	0.761	5.95687e-105	4	HNRNPA1
NDN1	2.68518e-107	0.466457	0.489	0.293	6.89018e-103	4	NDN
RPL38	2.91773e-104	0.380273	0.927	0.825	7.4869e-100	4	RPL38
RPSA1	8.93538e-103	0.311389	0.889	0.752	2.29282e-98	4	RPSA
RPL14	1.06235e-102	0.291773	0.947	0.839	2.72598e-98	4	RPL14
SLC25A61	1.82782e-101	0.389782	0.76	0.598	4.6902e-97	4	SLC25A6
SMOC22	1.39657e-99	0.467669	0.354	0.176	3.5836e-95	4	SMOC2
PTN2	5.87728e-98	0.449013	0.337	0.166	1.50811e-93	4	PTN
DLK12	3.02684e-97	0.379881	0.428	0.231	7.76688e-93	4	DLK1
WFDC11	8.78633e-94	0.379057	0.275	0.122	2.25457e-89	4	WFDC1
TPM21	8.23097e-91	0.516214	0.47	0.294	2.11207e-86	4	TPM2
APOC1	1.03544e-90	0.523298	0.278	0.134	2.65695e-86	4	APOC1
FAU	1.9247e-89	0.268359	0.943	0.85	4.93878e-85	4	FAU
C1S2	4.50557e-86	0.316373	0.413	0.222	1.15613e-81	4	C1S
TCEAL42	7.12199e-86	0.410362	0.66	0.513	1.8275e-81	4	TCEAL4
SELENOP1	3.5221e-84	0.385529	0.539	0.353	9.03772e-80	4	SELENOP
MYH111	3.29801e-83	0.519457	0.274	0.129	8.4627e-79	4	MYH11
LTBP42	3.40728e-81	0.272567	0.474	0.274	8.74308e-77	4	LTBP4
DPEP11	3.67713e-81	0.493672	0.343	0.184	9.43551e-77	4	DPEP1
RPL28	3.23232e-80	0.256147	0.973	0.909	8.29413e-76	4	RPL28
RPS29	6.32116e-77	0.356787	0.935	0.873	1.62201e-72	4	RPS29
F101	3.17743e-76	0.378907	0.267	0.13	8.1533e-72	4	F10
PTGDS2	8.32629e-76	0.758311	0.769	0.663	2.13653e-71	4	PTGDS
COL6A22	2.32128e-74	0.291394	0.488	0.299	5.95641e-70	4	COL6A2
ACTA21	8.39076e-72	0.599331	0.341	0.194	2.15307e-67	4	ACTA2
FHL22	4.74372e-71	0.596296	0.332	0.193	1.21724e-66	4	FHL2
CIRBP1	6.34614e-71	0.28	0.873	0.764	1.62842e-66	4	CIRBP
RARRES22	1.34928e-70	0.358142	0.374	0.217	3.46226e-66	4	RARRES2
UBA52	1.43146e-70	0.257378	0.892	0.771	3.67313e-66	4	UBA52
CALD12	4.01919e-70	0.347487	0.655	0.505	1.03132e-65	4	CALD1
BST21	6.63675e-69	0.36303	0.515	0.336	1.70299e-64	4	BST2
PTMS2	2.23582e-67	0.334583	0.627	0.476	5.7371e-63	4	PTMS
ZFAS11	2.66626e-66	0.40257	0.584	0.441	6.84161e-62	4	ZFAS1
MATN21	5.65427e-65	0.330944	0.325	0.183	1.45089e-60	4	MATN2
RAB341	8.9846e-64	0.37282	0.302	0.171	2.30545e-59	4	RAB34
RPS4Y1	1.47326e-62	0.280582	0.839	0.717	3.78039e-58	4	RPS4Y1
PFDN5	4.5216e-61	0.261218	0.809	0.676	1.16024e-56	4	PFDN5
UQCRB	5.16595e-61	0.286211	0.79	0.666	1.32558e-56	4	UQCRB
PRDX21	2.28309e-59	0.345785	0.526	0.391	5.85841e-55	4	PRDX2
EEF21	1.59877e-57	0.271893	0.779	0.669	4.10244e-53	4	EEF2
RPS28	6.12333e-56	0.253055	0.97	0.896	1.57125e-51	4	RPS28
PMP222	1.17661e-55	0.316535	0.319	0.188	3.01919e-51	4	PMP22
RPS17	1.40543e-55	0.343205	0.681	0.55	3.60633e-51	4	RPS17
SSPN2	1.49085e-54	0.332582	0.303	0.177	3.82553e-50	4	SSPN
AEBP11	1.63715e-53	0.378902	0.267	0.149	4.20092e-49	4	AEBP1
TMEM981	6.60173e-51	0.342471	0.284	0.167	1.694e-46	4	TMEM98
FCGRT1	4.16485e-50	0.288607	0.444	0.297	1.0687e-45	4	FCGRT
C12orf571	8.67515e-49	0.317268	0.523	0.405	2.22604e-44	4	C12orf57
EIF3E1	3.39535e-48	0.282629	0.658	0.537	8.71247e-44	4	EIF3E
EEF1B21	8.19012e-47	0.262933	0.747	0.641	2.10159e-42	4	EEF1B2
FXYD61	9.38008e-47	0.314249	0.513	0.382	2.40693e-42	4	FXYD6
NAP1L1	9.24577e-46	0.257781	0.7	0.598	2.37246e-41	4	NAP1L1
EMP32	2.5399e-45	0.295265	0.41	0.283	6.51738e-41	4	EMP3
COMMD6	7.61896e-43	0.28781	0.651	0.548	1.95503e-38	4	COMMD6
EIF3H1	2.79242e-42	0.300789	0.541	0.43	7.16535e-38	4	EIF3H
GCSH1	5.75807e-40	0.323005	0.286	0.184	1.47752e-35	4	GCSH
TPM11	1.02791e-39	0.330841	0.363	0.254	2.63762e-35	4	TPM1
TCEAL11	7.64704e-38	0.302955	0.294	0.192	1.96223e-33	4	TCEAL1
SSR21	7.89746e-38	0.287336	0.545	0.44	2.02649e-33	4	SSR2
MORF4L2	2.52817e-35	0.263614	0.488	0.388	6.48729e-31	4	MORF4L2
EIF3F1	1.45895e-34	0.278832	0.493	0.392	3.74368e-30	4	EIF3F
SNRPD2	2.86543e-34	0.259954	0.578	0.482	7.3527e-30	4	SNRPD2
PHPT1	8.47948e-34	0.255431	0.509	0.409	2.17583e-29	4	PHPT1
RSL1D11	2.97168e-33	0.290434	0.427	0.331	7.62532e-29	4	RSL1D1
NBL12	3.05074e-33	0.269954	0.287	0.189	7.82819e-29	4	NBL1
EIF3L1	3.94722e-33	0.290348	0.5	0.408	1.01286e-28	4	EIF3L
SELENOM2	4.83733e-33	0.270852	0.369	0.266	1.24126e-28	4	SELENOM
RPL36A	2.21619e-32	0.269224	0.655	0.536	5.68675e-28	4	RPL36A
NENF1	5.31486e-32	0.260614	0.404	0.303	1.36379e-27	4	NENF
GAMT	1.97699e-31	0.263285	0.261	0.171	5.07296e-27	4	GAMT
PEMT	1.86648e-30	0.307439	0.254	0.169	4.7894e-26	4	PEMT
C11orf962	4.18422e-30	0.256297	0.436	0.331	1.07367e-25	4	C11orf96
IGFBP62	7.64023e-28	0.277248	0.255	0.168	1.96048e-23	4	IGFBP6
RPL17	4.3262e-26	0.27743	0.439	0.351	1.1101e-21	4	RPL17
EPB41L4A-AS1	6.84275e-23	0.259999	0.336	0.262	1.75585e-18	4	EPB41L4A-AS1
MYL91	4.49518e-07	0.254852	0.462	0.465	0.0115346	4	MYL9
AMH2	0	1.42001	0.95	0.353	0	5	AMH
APOA12	0	1.41329	0.985	0.523	0	5	APOA1
INHA2	0	1.36189	0.848	0.26	0	5	INHA
BEX12	0	1.33842	0.951	0.39	0	5	BEX1
CITED12	0	1.28778	0.781	0.271	0	5	CITED1
RNASE12	0	1.26094	0.963	0.537	0	5	RNASE1
GSTA12	0	1.23115	0.852	0.337	0	5	GSTA1
CLU2	0	1.22793	0.883	0.417	0	5	CLU
FATE12	0	1.1821	0.686	0.228	0	5	FATE1
COPE2	0	1.11634	0.915	0.54	0	5	COPE
CTSV2	0	1.11245	0.728	0.237	0	5	CTSV
SERPINA51	0	1.10354	0.815	0.357	0	5	SERPINA5
C4orf482	0	1.05028	0.761	0.296	0	5	C4orf48
MYL6B2	0	1.04463	0.691	0.32	0	5	MYL6B
MIR202HG2	0	1.03885	0.856	0.321	0	5	MIR202HG
REEP62	0	0.996312	0.67	0.234	0	5	REEP6
TNNI32	0	0.987	0.566	0.167	0	5	TNNI3
GATM2	0	0.980819	0.67	0.205	0	5	GATM
G6PD2	0	0.976299	0.648	0.215	0	5	G6PD
HMGN52	0	0.970883	0.609	0.232	0	5	HMGN5
ABRACL2	0	0.958293	0.583	0.185	0	5	ABRACL
SERPINF12	0	0.935894	0.92	0.528	0	5	SERPINF1
SUSD32	0	0.915497	0.559	0.171	0	5	SUSD3
TMEM972	0	0.91241	0.606	0.212	0	5	TMEM97
SMIM12	0	0.895494	0.506	0.16	0	5	SMIM1
MGST32	0	0.891275	0.896	0.61	0	5	MGST3
PRDX62	0	0.887491	0.86	0.577	0	5	PRDX6
PRNP1	0	0.826556	0.675	0.304	0	5	PRNP
IFI27L12	0	0.818675	0.604	0.256	0	5	IFI27L1
FDXR2	0	0.817029	0.546	0.185	0	5	FDXR
TSTD12	0	0.811849	0.5	0.155	0	5	TSTD1
PLA2G162	0	0.805026	0.557	0.214	0	5	PLA2G16
CD991	0	0.790154	0.863	0.62	0	5	CD99
STMN12	0	0.787311	0.823	0.472	0	5	STMN1
TFF31	0	0.786398	0.445	0.115	0	5	TFF3
NUDT111	0	0.773189	0.461	0.149	0	5	NUDT11
PPIF2	0	0.77162	0.462	0.148	0	5	PPIF
BEX32	0	0.759129	0.921	0.679	0	5	BEX3
GNG71	0	0.752008	0.43	0.124	0	5	GNG7
SOX91	0	0.711423	0.495	0.154	0	5	SOX9
MARCKSL12	0	0.704998	0.878	0.648	0	5	MARCKSL1
PEBP12	0	0.701562	0.858	0.623	0	5	PEBP1
RPS291	0	0.671955	0.986	0.869	0	5	RPS29
DYNLL11	0	0.618212	0.895	0.739	0	5	DYNLL1
LAPTM4A1	0	0.615921	0.923	0.753	0	5	LAPTM4A
LGALS1	2.02069e-307	0.620217	0.929	0.76	5.1851e-303	5	LGALS1
RPL281	2.30125e-305	0.458639	0.971	0.91	5.905e-301	5	RPL28
TCEAL22	2.52127e-304	0.75958	0.459	0.157	6.46959e-300	5	TCEAL2
TMEM176B1	1.65888e-301	0.765329	0.461	0.158	4.25668e-297	5	TMEM176B
TRIM551	8.95852e-301	0.644313	0.344	0.092	2.29876e-296	5	TRIM55
CLDN111	7.32956e-292	0.85293	0.576	0.241	1.88077e-287	5	CLDN11
BEX22	2.31394e-287	0.768674	0.501	0.191	5.93758e-283	5	BEX2
TCEAL52	1.57617e-283	0.738956	0.458	0.163	4.04446e-279	5	TCEAL5
RPLP11	2.53843e-283	0.374659	0.998	0.966	6.51361e-279	5	RPLP1
CKB2	3.70332e-276	0.682055	0.78	0.446	9.50271e-272	5	CKB
RPLP21	3.68495e-259	0.408221	0.979	0.944	9.45558e-255	5	RPLP2
AC022075.11	2.01065e-258	0.584893	0.274	0.068	5.15933e-254	5	AC022075.1
COX7C	5.58667e-257	0.555811	0.884	0.702	1.43354e-252	5	COX7C
RPL391	5.40231e-256	0.451746	0.983	0.892	1.38623e-251	5	RPL39
RBP11	6.67519e-251	0.703159	0.559	0.25	1.71285e-246	5	RBP1
HPRT12	5.8569e-242	0.726276	0.526	0.233	1.50288e-237	5	HPRT1
RPS271	4.04188e-238	0.396014	0.992	0.948	1.03715e-233	5	RPS27
BRICD51	9.59903e-237	0.616993	0.294	0.083	2.46311e-232	5	BRICD5
GSTA42	2.0021e-232	0.684669	0.475	0.198	5.13739e-228	5	GSTA4
ATP5MD2	2.40648e-232	0.689337	0.698	0.438	6.17502e-228	5	ATP5MD
S100A161	9.55467e-232	0.667192	0.614	0.309	2.45173e-227	5	S100A16
BEX51	1.87655e-231	0.629251	0.306	0.091	4.81522e-227	5	BEX5
NUDT101	9.61911e-230	0.621947	0.359	0.121	2.46826e-225	5	NUDT10
FSCN11	2.93263e-229	0.63129	0.518	0.225	7.52512e-225	5	FSCN1
RPL361	1.3183e-224	0.413093	0.973	0.894	3.38277e-220	5	RPL36
WNT61	2.79853e-224	0.531848	0.275	0.075	7.18102e-220	5	WNT6
SPOCK21	1.35581e-223	0.566936	0.32	0.099	3.479e-219	5	SPOCK2
ECH12	8.54807e-223	0.668643	0.631	0.343	2.19343e-218	5	ECH1
RPL411	2.35391e-219	0.35241	0.997	0.957	6.04014e-215	5	RPL41
GMPR1	4.00309e-219	0.656517	0.393	0.146	1.02719e-214	5	GMPR
TUBA1A1	7.4822e-218	0.617788	0.773	0.535	1.91993e-213	5	TUBA1A
S100A10	7.86682e-215	0.530511	0.788	0.49	2.01863e-210	5	S100A10
TCEA31	4.25211e-212	0.620024	0.389	0.146	1.09109e-207	5	TCEA3
POMC1	1.35548e-211	0.672983	0.364	0.13	3.47815e-207	5	POMC
SPARC1	2.67571e-210	0.518335	0.875	0.661	6.86586e-206	5	SPARC
RPS32	3.58141e-210	0.34818	0.986	0.922	9.1899e-206	5	RPS3
RPL37A1	4.10011e-207	0.365509	0.972	0.91	1.05209e-202	5	RPL37A
HIGD2A2	2.11933e-206	0.633182	0.587	0.306	5.43821e-202	5	HIGD2A
ERG281	1.58227e-205	0.667386	0.499	0.235	4.06012e-201	5	ERG28
ALDH1A13	3.24347e-205	0.636065	0.608	0.317	8.32273e-201	5	ALDH1A1
NDUFS5	2.0468e-203	0.608645	0.75	0.53	5.25209e-199	5	NDUFS5
NKX3-11	2.74398e-199	0.531059	0.309	0.099	7.04105e-195	5	NKX3-1
MBOAT71	8.68245e-198	0.606151	0.403	0.158	2.22792e-193	5	MBOAT7
SPINT22	9.27412e-194	0.594076	0.509	0.234	2.37974e-189	5	SPINT2
RPS281	2.94605e-192	0.370235	0.972	0.896	7.55956e-188	5	RPS28
MYL6	2.51642e-186	0.393236	0.922	0.801	6.45712e-182	5	MYL6
TMEM1231	6.30028e-186	0.648716	0.554	0.289	1.61665e-181	5	TMEM123
ATP5MC2	4.18707e-184	0.539804	0.811	0.615	1.0744e-179	5	ATP5MC2
CADM11	2.99912e-183	0.567444	0.349	0.131	7.69574e-179	5	CADM1
GNG21	3.77322e-182	0.488791	0.29	0.095	9.68208e-178	5	GNG2
SRSF92	1.10312e-177	0.588268	0.687	0.445	2.83062e-173	5	SRSF9
REEP11	1.2012e-175	0.494423	0.287	0.095	3.08229e-171	5	REEP1
ISYNA12	6.76845e-173	0.620637	0.575	0.309	1.73678e-168	5	ISYNA1
DYNLT11	8.87031e-172	0.612076	0.608	0.36	2.27612e-167	5	DYNLT1
SERF2	6.62884e-171	0.431131	0.87	0.771	1.70096e-166	5	SERF2
GADD45G1	1.35548e-170	0.539436	0.616	0.335	3.47816e-166	5	GADD45G
SLC25A41	1.69151e-166	0.589413	0.449	0.211	4.34041e-162	5	SLC25A4
ENO12	9.00414e-165	0.556159	0.7	0.469	2.31046e-160	5	ENO1
CSDC21	3.73066e-163	0.468647	0.264	0.086	9.57288e-159	5	CSDC2
INHBB1	7.09813e-163	0.487294	0.305	0.109	1.82138e-158	5	INHBB
CYP11A11	1.30184e-161	0.541133	0.354	0.142	3.34053e-157	5	CYP11A1
S100A132	2.0469e-160	0.610051	0.651	0.405	5.25234e-156	5	S100A13
PHGDH1	7.98244e-160	0.545581	0.528	0.274	2.04829e-155	5	PHGDH
CFI1	8.02705e-160	0.562221	0.307	0.114	2.05974e-155	5	CFI
1961-09-01	3.52224e-159	0.532634	0.428	0.192	9.03806e-155	5	2023-09-06
RBBP72	5.58078e-158	0.535193	0.666	0.422	1.43203e-153	5	RBBP7
SCRG11	1.24695e-155	0.628391	0.36	0.151	3.19967e-151	5	SCRG1
FAM98A1	2.62609e-155	0.547703	0.343	0.139	6.73855e-151	5	FAM98A
AXL1	3.73287e-154	0.594975	0.352	0.144	9.57854e-150	5	AXL
TCEAL91	8.51287e-154	0.503649	0.738	0.505	2.1844e-149	5	TCEAL9
BEX42	3.71952e-152	0.552037	0.487	0.248	9.54429e-148	5	BEX4
RPL23A2	1.32642e-151	0.317607	0.98	0.908	3.4036e-147	5	RPL23A
CHPF1	2.11262e-150	0.512054	0.346	0.141	5.42099e-146	5	CHPF
ANG	8.52353e-147	0.499874	0.274	0.099	2.18714e-142	5	ANG
RPL27A1	1.60658e-146	0.317073	0.964	0.901	4.1225e-142	5	RPL27A
WT11	3.95356e-146	0.478604	0.369	0.158	1.01448e-141	5	WT1
TOMM7	4.88983e-146	0.471443	0.781	0.593	1.25473e-141	5	TOMM7
GSTM32	3.39661e-145	0.573903	0.663	0.428	8.7157e-141	5	GSTM3
RPL381	5.95835e-145	0.356769	0.921	0.826	1.52891e-140	5	RPL38
JAM21	4.71825e-144	0.528216	0.359	0.155	1.2107e-139	5	JAM2
ATP5F1E1	6.26314e-144	0.455365	0.81	0.662	1.60712e-139	5	ATP5F1E
PRDX1	1.04234e-143	0.496454	0.756	0.567	2.67463e-139	5	PRDX1
TMEM2581	1.66008e-143	0.514103	0.672	0.455	4.25976e-139	5	TMEM258
HERC52	3.38624e-143	0.442806	0.468	0.225	8.68909e-139	5	HERC5
ADGRG11	4.57785e-143	0.463829	0.27	0.097	1.17468e-138	5	ADGRG1
MGARP	1.44362e-141	0.493112	0.253	0.088	3.70433e-137	5	MGARP
SCD1	1.54212e-141	0.433132	0.268	0.096	3.95707e-137	5	SCD
UQCRH1	2.73417e-141	0.498135	0.731	0.539	7.01588e-137	5	UQCRH
UQCR101	3.52948e-140	0.534028	0.637	0.416	9.05665e-136	5	UQCR10
MIF1	2.74492e-139	0.606258	0.614	0.39	7.04346e-135	5	MIF
ACSM31	1.24534e-137	0.445364	0.328	0.133	3.19555e-133	5	ACSM3
SLC27A31	1.50079e-136	0.468467	0.315	0.128	3.85101e-132	5	SLC27A3
IL11RA1	4.69668e-134	0.524699	0.415	0.202	1.20517e-129	5	IL11RA
GNG5	2.6861e-129	0.524945	0.608	0.394	6.89252e-125	5	GNG5
CYP27A11	2.8067e-129	0.478376	0.276	0.107	7.20198e-125	5	CYP27A1
CDH21	3.40108e-128	0.483248	0.302	0.124	8.72717e-124	5	CDH2
TSTA31	1.30854e-125	0.481161	0.35	0.159	3.35772e-121	5	TSTA3
RTRAF1	4.46235e-124	0.51771	0.635	0.428	1.14504e-119	5	RTRAF
TGIF11	4.57818e-122	0.459185	0.294	0.122	1.17476e-117	5	TGIF1
COX8A	3.9582e-120	0.492734	0.596	0.387	1.01567e-115	5	COX8A
RAC31	2.43861e-119	0.460062	0.312	0.134	6.25747e-115	5	RAC3
ASS11	3.8746e-119	0.502427	0.345	0.16	9.94221e-115	5	ASS1
RPL351	6.31472e-119	0.289404	0.939	0.887	1.62036e-114	5	RPL35
MRPL162	1.94251e-115	0.486845	0.4	0.205	4.98448e-111	5	MRPL16
CHCHD10	2.98418e-115	0.458372	0.357	0.169	7.65741e-111	5	CHCHD10
RPS211	4.71897e-115	0.373533	0.855	0.707	1.21089e-110	5	RPS21
DRAP11	9.51232e-115	0.497835	0.607	0.401	2.44086e-110	5	DRAP1
COX7A2	2.90585e-114	0.437249	0.679	0.496	7.4564e-110	5	COX7A2
COMT1	5.40797e-114	0.505261	0.493	0.284	1.38769e-109	5	COMT
COX5B	1.04204e-113	0.421957	0.734	0.56	2.67387e-109	5	COX5B
JPT11	2.89899e-113	0.458671	0.388	0.194	7.43881e-109	5	JPT1
BLOC1S1	9.22771e-113	0.512151	0.433	0.236	2.36783e-108	5	BLOC1S1
ATP5IF1	3.94756e-112	0.473159	0.603	0.401	1.01294e-107	5	ATP5IF1
MAGED11	1.8928e-111	0.458863	0.394	0.2	4.85693e-107	5	MAGED1
TMSB10	4.23837e-111	0.306677	0.945	0.868	1.08757e-106	5	TMSB10
TRAPPC1	1.07625e-110	0.46934	0.456	0.253	2.76167e-106	5	TRAPPC1
SMS	4.09806e-110	0.466662	0.455	0.249	1.05156e-105	5	SMS
GATA41	9.17285e-110	0.385991	0.328	0.148	2.35375e-105	5	GATA4
PRKAR2B1	1.50818e-109	0.430707	0.348	0.165	3.86998e-105	5	PRKAR2B
KLHL231	6.73003e-108	0.402564	0.278	0.117	1.72693e-103	5	KLHL23
NDFIP11	3.09869e-106	0.492039	0.506	0.305	7.95124e-102	5	NDFIP1
TMX41	4.79015e-106	0.495597	0.417	0.225	1.22915e-101	5	TMX4
ATP5F1C	5.18544e-106	0.49377	0.589	0.405	1.33058e-101	5	ATP5F1C
RPS132	8.72412e-106	0.285479	0.953	0.877	2.23861e-101	5	RPS13
ATP5F1B	2.45498e-105	0.454041	0.63	0.439	6.29948e-101	5	ATP5F1B
CCDC28B1	2.09295e-103	0.422991	0.293	0.131	5.37052e-99	5	CCDC28B
DMAC1	3.39456e-103	0.490192	0.427	0.239	8.71044e-99	5	DMAC1
TIMM8B1	3.45746e-103	0.458543	0.443	0.248	8.87183e-99	5	TIMM8B
ZFAND51	4.41025e-103	0.443023	0.567	0.364	1.13167e-98	5	ZFAND5
PLEKHJ11	5.69985e-103	0.434394	0.386	0.2	1.46258e-98	5	PLEKHJ1
ARF4	8.45648e-103	0.485013	0.571	0.373	2.16993e-98	5	ARF4
COMMD61	1.20747e-101	0.441221	0.711	0.544	3.09837e-97	5	COMMD6
ATP1B11	2.70006e-100	0.48707	0.474	0.279	6.92835e-96	5	ATP1B1
ZFAND62	3.01601e-100	0.459372	0.476	0.28	7.73907e-96	5	ZFAND6
GPRC5B1	2.19701e-99	0.410839	0.286	0.128	5.63752e-95	5	GPRC5B
UBB1	1.35145e-98	0.299074	0.89	0.796	3.46782e-94	5	UBB
HLTF2	3.35626e-98	0.383726	0.381	0.194	8.61216e-94	5	HLTF
GPC11	4.78353e-98	0.411405	0.259	0.111	1.22745e-93	5	GPC1
MYL12B	4.23891e-97	0.405952	0.752	0.607	1.08771e-92	5	MYL12B
NDUFA1	4.87997e-96	0.448812	0.59	0.401	1.2522e-91	5	NDUFA1
EID1	6.4786e-96	0.362119	0.788	0.65	1.66241e-91	5	EID1
ATF7IP21	1.95921e-95	0.399036	0.297	0.138	5.02734e-91	5	ATF7IP2
ARL6IP11	1.7313e-94	0.501571	0.502	0.311	4.44251e-90	5	ARL6IP1
NDUFA21	2.18369e-94	0.465836	0.506	0.317	5.60336e-90	5	NDUFA2
IFI27L2	4.31423e-94	0.441512	0.443	0.255	1.10703e-89	5	IFI27L2
RAB13	7.86585e-94	0.441292	0.519	0.325	2.01838e-89	5	RAB13
RPS4Y11	9.12091e-94	0.349518	0.849	0.717	2.34042e-89	5	RPS4Y1
BTF3L4	2.44744e-93	0.459789	0.386	0.209	6.28014e-89	5	BTF3L4
DUSP23	2.7073e-93	0.402861	0.286	0.133	6.94694e-89	5	DUSP23
TBCA	6.44505e-92	0.436123	0.605	0.423	1.6538e-87	5	TBCA
SAT21	2.44991e-91	0.387059	0.546	0.342	6.28647e-87	5	SAT2
VDAC1	5.34489e-90	0.446206	0.392	0.218	1.3715e-85	5	VDAC1
HMGN31	9.01411e-89	0.401553	0.598	0.411	2.31302e-84	5	HMGN3
NDUFB1	2.07376e-87	0.413376	0.501	0.314	5.32128e-83	5	NDUFB1
SEM11	4.39835e-87	0.40115	0.654	0.488	1.12862e-82	5	SEM1
FABP5	9.86092e-87	0.317578	0.351	0.18	2.53031e-82	5	FABP5
MSMO1	2.56295e-86	0.387458	0.287	0.136	6.57654e-82	5	MSMO1
DDX242	3.10324e-86	0.37594	0.661	0.475	7.96292e-82	5	DDX24
TXNDC171	5.54187e-86	0.395701	0.398	0.224	1.42204e-81	5	TXNDC17
WIPF31	5.61188e-85	0.357762	0.34	0.173	1.44001e-80	5	WIPF3
RPL231	4.18836e-84	0.251406	0.926	0.822	1.07473e-79	5	RPL23
VCL1	2.5957e-83	0.372898	0.317	0.16	6.66056e-79	5	VCL
SLC25A5	1.06389e-82	0.446937	0.548	0.377	2.72995e-78	5	SLC25A5
ALDH9A11	4.45684e-82	0.455704	0.444	0.273	1.14362e-77	5	ALDH9A1
PPDPF	2.78334e-81	0.44232	0.644	0.496	7.14206e-77	5	PPDPF
VKORC1	5.83256e-81	0.42428	0.439	0.266	1.49664e-76	5	VKORC1
ZYX1	9.96659e-80	0.4083	0.291	0.146	2.55743e-75	5	ZYX
CSTB	2.8687e-78	0.381975	0.594	0.428	7.36109e-74	5	CSTB
OST4	2.04582e-77	0.385405	0.652	0.499	5.24959e-73	5	OST4
COPS9	5.19465e-77	0.402922	0.488	0.319	1.33295e-72	5	COPS9
TMEM141	1.32362e-76	0.409295	0.334	0.181	3.3964e-72	5	TMEM141
ATP6V1G1	1.60383e-76	0.387903	0.677	0.525	4.11543e-72	5	ATP6V1G1
SNRPN1	3.51846e-76	0.417853	0.377	0.218	9.02836e-72	5	SNRPN
GAS61	3.55491e-76	0.447837	0.416	0.249	9.1219e-72	5	GAS6
CAMTA12	8.61779e-76	0.386305	0.464	0.292	2.21132e-71	5	CAMTA1
PTBP31	2.97351e-75	0.306077	0.272	0.132	7.63004e-71	5	PTBP3
NDUFB91	5.68917e-75	0.387726	0.597	0.424	1.45984e-70	5	NDUFB9
MED251	6.27434e-75	0.320911	0.273	0.133	1.61e-70	5	MED25
JTB	2.37923e-74	0.389553	0.487	0.318	6.10509e-70	5	JTB
UQCRQ	8.80774e-74	0.407646	0.586	0.427	2.26007e-69	5	UQCRQ
GRHPR	1.72935e-73	0.408916	0.396	0.236	4.4375e-69	5	GRHPR
CMAS	5.23369e-73	0.387363	0.315	0.169	1.34296e-68	5	CMAS
ATP5ME	1.84422e-72	0.370011	0.564	0.395	4.73227e-68	5	ATP5ME
CTSA1	3.99941e-72	0.399299	0.264	0.131	1.02625e-67	5	CTSA
CTNNAL11	9.06053e-72	0.357881	0.369	0.209	2.32493e-67	5	CTNNAL1
WDR83OS	4.4334e-71	0.389624	0.563	0.401	1.13761e-66	5	WDR83OS
MGST2	1.12304e-70	0.323996	0.427	0.252	2.88171e-66	5	MGST2
TMA7	2.45483e-70	0.322827	0.737	0.608	6.29909e-66	5	TMA7
DCTPP1	8.962e-70	0.383382	0.284	0.149	2.29965e-65	5	DCTPP1
HSBP1	4.62589e-69	0.370777	0.576	0.412	1.187e-64	5	HSBP1
TSPYL21	2.36232e-68	0.29773	0.469	0.295	6.06171e-64	5	TSPYL2
NDUFA11	6.33364e-68	0.410445	0.469	0.309	1.62521e-63	5	NDUFA11
NDUFA4	1.09504e-67	0.327075	0.749	0.635	2.80988e-63	5	NDUFA4
C1orf122	1.68722e-67	0.367663	0.372	0.22	4.3294e-63	5	C1orf122
LLPH	8.48465e-67	0.355684	0.254	0.127	2.17716e-62	5	LLPH
SELENOH1	1.62918e-66	0.379905	0.484	0.32	4.18048e-62	5	SELENOH
TSEN341	1.1516e-65	0.361635	0.392	0.24	2.955e-61	5	TSEN34
NDUFC1	1.712e-65	0.376885	0.497	0.339	4.39299e-61	5	NDUFC1
HMGN11	2.10476e-65	0.335267	0.664	0.514	5.40081e-61	5	HMGN1
UBL5	2.86473e-65	0.358326	0.658	0.514	7.3509e-61	5	UBL5
ATP5MF	3.0235e-65	0.360246	0.541	0.385	7.75831e-61	5	ATP5MF
RAD211	5.30802e-65	0.32623	0.46	0.295	1.36204e-60	5	RAD21
ROMO11	6.63664e-65	0.362915	0.444	0.286	1.70296e-60	5	ROMO1
ATOX1	1.17197e-64	0.361532	0.43	0.276	3.00727e-60	5	ATOX1
AP2S1	9.3549e-64	0.38213	0.437	0.284	2.40047e-59	5	AP2S1
GAPDH	2.12892e-63	0.267581	0.868	0.784	5.4628e-59	5	GAPDH
PPM1K1	3.30971e-63	0.35403	0.284	0.152	8.49272e-59	5	PPM1K
PDRG1	9.13067e-63	0.356774	0.283	0.152	2.34293e-58	5	PDRG1
SERINC51	2.24967e-62	0.325878	0.291	0.157	5.77265e-58	5	SERINC5
KTN11	7.47442e-62	0.332764	0.613	0.452	1.91794e-57	5	KTN1
NDUFA13	1.38529e-61	0.435507	0.429	0.281	3.55467e-57	5	NDUFA13
ATP1A11	5.46691e-61	0.331439	0.42	0.264	1.40281e-56	5	ATP1A1
ECI2	4.6856e-60	0.352591	0.323	0.189	1.20233e-55	5	ECI2
CARHSP1	9.91045e-60	0.307395	0.349	0.207	2.54302e-55	5	CARHSP1
PRDX41	3.33942e-59	0.376056	0.53	0.379	8.56895e-55	5	PRDX4
SMOC11	4.22157e-59	0.309275	0.253	0.13	1.08326e-54	5	SMOC1
SKP11	8.53154e-59	0.278734	0.84	0.736	2.18919e-54	5	SKP1
UQCRB1	2.83968e-58	0.288177	0.767	0.668	7.28663e-54	5	UQCRB
RPS10	1.4597e-57	0.427769	0.637	0.507	3.7456e-53	5	RPS10
SUMO2	1.7078e-57	0.297105	0.775	0.672	4.38222e-53	5	SUMO2
NDUFS8	1.96978e-57	0.356231	0.417	0.273	5.05444e-53	5	NDUFS8
CALR	1.10284e-56	0.395065	0.569	0.44	2.8299e-52	5	CALR
TXNDC12	1.97698e-56	0.36599	0.31	0.181	5.07292e-52	5	TXNDC12
LGALS3BP1	2.40586e-56	0.337256	0.499	0.33	6.17343e-52	5	LGALS3BP
HINT2	2.63156e-56	0.320442	0.302	0.173	6.7526e-52	5	HINT2
HMGCS11	3.44199e-56	0.252017	0.26	0.137	8.83216e-52	5	HMGCS1
UQCR11	4.59811e-56	0.384495	0.529	0.381	1.17988e-51	5	UQCR11
ELOB1	1.00635e-55	0.312527	0.683	0.561	2.58229e-51	5	ELOB
DECR1	1.08877e-55	0.343145	0.331	0.198	2.79379e-51	5	DECR1
STMP1	1.38898e-55	0.31133	0.345	0.208	3.56412e-51	5	STMP1
VPS351	1.90668e-55	0.329481	0.376	0.236	4.89255e-51	5	VPS35
MAP3K131	1.77877e-54	0.335172	0.311	0.182	4.56433e-50	5	MAP3K13
TCEAL8	2.0413e-54	0.336273	0.417	0.27	5.23797e-50	5	TCEAL8
NDUFB51	1.33953e-53	0.384011	0.42	0.279	3.43722e-49	5	NDUFB5
COX6B1	8.33166e-53	0.315203	0.595	0.461	2.1379e-48	5	COX6B1
COX7B	8.7245e-53	0.325466	0.49	0.344	2.23871e-48	5	COX7B
FAM96B1	1.59019e-52	0.325418	0.46	0.315	4.08043e-48	5	FAM96B
MAGED2	4.09002e-52	0.271172	0.67	0.51	1.0495e-47	5	MAGED2
TRMT112	5.16541e-52	0.275544	0.678	0.538	1.32544e-47	5	TRMT112
LAPTM4B1	6.28723e-52	0.34422	0.334	0.205	1.6133e-47	5	LAPTM4B
NAXE	8.50633e-52	0.329193	0.278	0.158	2.18272e-47	5	NAXE
PAIP21	1.39368e-51	0.31495	0.52	0.377	3.57619e-47	5	PAIP2
TPI1	2.00334e-51	0.318291	0.689	0.563	5.14057e-47	5	TPI1
CNIH1	9.0096e-51	0.349532	0.287	0.167	2.31186e-46	5	CNIH1
NDUFB61	1.00848e-50	0.34304	0.403	0.267	2.58775e-46	5	NDUFB6
NDUFB7	1.05857e-50	0.33071	0.553	0.41	2.7163e-46	5	NDUFB7
CHMP4B	2.12504e-50	0.31537	0.402	0.265	5.45284e-46	5	CHMP4B
POLR2L1	2.31975e-50	0.376962	0.522	0.385	5.95248e-46	5	POLR2L
UROD1	2.54516e-50	0.321112	0.349	0.218	6.53088e-46	5	UROD
ATP5MPL	3.31312e-49	0.30074	0.633	0.504	8.50146e-45	5	ATP5MPL
EIF3M	5.7235e-49	0.322057	0.479	0.339	1.46865e-44	5	EIF3M
TXN21	8.13088e-49	0.328619	0.378	0.243	2.08638e-44	5	TXN2
BBX1	2.80829e-48	0.26825	0.529	0.381	7.20606e-44	5	BBX
COX6A1	3.46432e-48	0.311029	0.611	0.481	8.88945e-44	5	COX6A1
TECR	5.60474e-48	0.355897	0.426	0.289	1.43818e-43	5	TECR
TPM3	7.59388e-48	0.299374	0.348	0.219	1.94859e-43	5	TPM3
MRPL57	2.77706e-47	0.31081	0.396	0.265	7.12592e-43	5	MRPL57
SMARCA11	4.91836e-47	0.291116	0.324	0.197	1.26205e-42	5	SMARCA1
FAM200B	7.08202e-47	0.319294	0.273	0.158	1.81725e-42	5	FAM200B
LAMTOR2	1.74746e-46	0.287571	0.283	0.168	4.48398e-42	5	LAMTOR2
SREK1IP11	4.94605e-46	0.329487	0.315	0.195	1.26916e-41	5	SREK1IP1
RPL36A1	6.81548e-46	0.370886	0.669	0.535	1.74885e-41	5	RPL36A
NOTCH21	1.02967e-45	0.288665	0.254	0.142	2.64212e-41	5	NOTCH2
ANP32A	1.16367e-45	0.310861	0.263	0.154	2.98599e-41	5	ANP32A
FKBP3	1.54614e-45	0.314572	0.345	0.219	3.96739e-41	5	FKBP3
OAZ1	1.84725e-45	0.260269	0.717	0.608	4.74006e-41	5	OAZ1
HADHB	4.78483e-45	0.296552	0.345	0.223	1.22779e-40	5	HADHB
NFE2L21	6.72751e-45	0.305238	0.442	0.306	1.72628e-40	5	NFE2L2
GADD45GIP1	9.30976e-45	0.323469	0.501	0.37	2.38888e-40	5	GADD45GIP1
PLIN31	1.08121e-44	0.330512	0.259	0.151	2.77438e-40	5	PLIN3
ATP5PF	1.36165e-44	0.294299	0.589	0.472	3.494e-40	5	ATP5PF
NDUFC2	1.77739e-44	0.307426	0.495	0.364	4.56078e-40	5	NDUFC2
SGCE1	4.26941e-44	0.268911	0.281	0.163	1.09553e-39	5	SGCE
NDUFB11	1.41706e-43	0.294061	0.473	0.34	3.63617e-39	5	NDUFB11
LRPAP1	3.08275e-43	0.360955	0.439	0.313	7.91035e-39	5	LRPAP1
SMIM26	3.12202e-43	0.310826	0.383	0.257	8.01111e-39	5	SMIM26
UQCRFS11	3.76123e-43	0.31002	0.388	0.261	9.65132e-39	5	UQCRFS1
TMED10	1.57285e-42	0.315351	0.461	0.332	4.03592e-38	5	TMED10
ATP6V0B1	1.8009e-42	0.297557	0.38	0.255	4.62111e-38	5	ATP6V0B
EAPP	4.65346e-42	0.325383	0.345	0.227	1.19408e-37	5	EAPP
FBL	8.658e-42	0.292829	0.441	0.313	2.22164e-37	5	FBL
MORF4L11	1.02101e-41	0.274606	0.72	0.607	2.61991e-37	5	MORF4L1
POLR2F2	1.07956e-41	0.295351	0.46	0.327	2.77015e-37	5	POLR2F
TSPYL11	1.37951e-41	0.283837	0.297	0.183	3.53982e-37	5	TSPYL1
SEC61G	2.30173e-41	0.26599	0.557	0.429	5.90624e-37	5	SEC61G
ARPC5	2.71106e-41	0.308754	0.438	0.312	6.95658e-37	5	ARPC5
SNRPE	6.29012e-41	0.284077	0.565	0.442	1.61405e-36	5	SNRPE
TIMM13	6.97067e-41	0.296285	0.47	0.34	1.78867e-36	5	TIMM13
RPS171	1.01326e-40	0.291015	0.678	0.55	2.60002e-36	5	RPS17
LSM7	1.88349e-40	0.270473	0.455	0.325	4.83303e-36	5	LSM7
GRN1	3.55879e-40	0.32478	0.36	0.241	9.13185e-36	5	GRN
YWHAE1	5.08815e-40	0.262817	0.616	0.49	1.30562e-35	5	YWHAE
AURKAIP11	2.12317e-39	0.28395	0.412	0.288	5.44805e-35	5	AURKAIP1
ARL3	6.53631e-39	0.287733	0.327	0.213	1.67722e-34	5	ARL3
CCND21	8.04384e-39	0.252632	0.324	0.208	2.06405e-34	5	CCND2
CYB5A	3.01505e-38	0.259481	0.365	0.246	7.73662e-34	5	CYB5A
FLYWCH2	9.36086e-38	0.26241	0.254	0.153	2.402e-33	5	FLYWCH2
FOXO31	1.28496e-37	0.255167	0.288	0.18	3.29721e-33	5	FOXO3
LSM5	1.80329e-37	0.267185	0.4	0.278	4.62724e-33	5	LSM5
TBCB	4.68479e-37	0.290393	0.449	0.328	1.20212e-32	5	TBCB
FKBP2	6.36443e-37	0.26729	0.508	0.387	1.63311e-32	5	FKBP2
HSF1	1.32862e-36	0.265992	0.258	0.158	3.40925e-32	5	HSF1
NOP10	1.35318e-36	0.286582	0.386	0.272	3.47225e-32	5	NOP10
NUTF2	1.66295e-36	0.287928	0.282	0.179	4.26713e-32	5	NUTF2
SLIRP	2.08554e-36	0.273098	0.411	0.293	5.35149e-32	5	SLIRP
RHOC	4.61125e-36	0.284432	0.546	0.422	1.18325e-31	5	RHOC
GLO1	4.64704e-36	0.298874	0.341	0.23	1.19243e-31	5	GLO1
HNRNPK	1.05728e-35	0.255327	0.645	0.534	2.71298e-31	5	HNRNPK
UBE2E1	1.12342e-35	0.267598	0.262	0.163	2.8827e-31	5	UBE2E1
IAH1	2.22305e-35	0.276762	0.264	0.163	5.70436e-31	5	IAH1
NDUFB2	3.65871e-35	0.276737	0.514	0.403	9.38824e-31	5	NDUFB2
MRPS6	4.49404e-35	0.263301	0.322	0.213	1.15317e-30	5	MRPS6
TMEM14A	6.89844e-35	0.274719	0.282	0.18	1.77014e-30	5	TMEM14A
MDH1	1.2759e-34	0.275328	0.366	0.254	3.27396e-30	5	MDH1
PET100	2.1127e-34	0.275152	0.3	0.197	5.4212e-30	5	PET100
ARF5	6.86464e-34	0.287674	0.295	0.192	1.76147e-29	5	ARF5
BRK1	1.18725e-33	0.27942	0.572	0.463	3.04647e-29	5	BRK1
PUF60	1.27488e-33	0.26095	0.368	0.255	3.27133e-29	5	PUF60
ATP5F1D	1.59442e-33	0.254192	0.541	0.424	4.09129e-29	5	ATP5F1D
GTF2H5	3.47698e-33	0.251288	0.409	0.294	8.92193e-29	5	GTF2H5
RNF5	9.7835e-33	0.301333	0.291	0.193	2.51045e-28	5	RNF5
MRPL33	9.87057e-32	0.264689	0.421	0.311	2.53279e-27	5	MRPL33
EIF1AY	1.09402e-31	0.257298	0.266	0.171	2.80726e-27	5	EIF1AY
FBXO211	1.42911e-30	0.268182	0.365	0.26	3.6671e-26	5	FBXO21
MTCH1	4.94824e-30	0.255876	0.407	0.299	1.26972e-25	5	MTCH1
AP2M1	8.32571e-30	0.253759	0.488	0.374	2.13638e-25	5	AP2M1
SCP2	7.92876e-26	0.261988	0.335	0.241	2.03452e-21	5	SCP2
SRP9	6.63341e-25	0.255923	0.492	0.393	1.70213e-20	5	SRP9
SUPT4H1	3.93001e-24	0.258169	0.306	0.219	1.00844e-19	5	SUPT4H1
FAM213A	2.02297e-20	0.258123	0.305	0.223	5.19093e-16	5	FAM213A
PSMA2	1.43994e-18	0.258928	0.272	0.201	3.69489e-14	5	PSMA2
CTGF	0	2.15405	0.767	0.136	0	6	CTGF
GNG11	0	2.15098	0.976	0.171	0	6	GNG11
HLA-B	0	1.95305	0.979	0.283	0	6	HLA-B
HLA-C	0	1.90317	0.961	0.319	0	6	HLA-C
ITM2A	0	1.89831	0.871	0.148	0	6	ITM2A
SPARCL1	0	1.83916	0.996	0.384	0	6	SPARCL1
HLA-E	0	1.8172	0.947	0.232	0	6	HLA-E
VWF	0	1.80948	0.849	0.064	0	6	VWF
RBP7	0	1.77967	0.745	0.05	0	6	RBP7
TM4SF1	0	1.76542	0.9	0.171	0	6	TM4SF1
B2M	0	1.74769	1	0.737	0	6	B2M
MGP	0	1.72907	0.929	0.326	0	6	MGP
IFI27	0	1.72385	0.815	0.169	0	6	IFI27
CAV1	0	1.71303	0.901	0.208	0	6	CAV1
APOD	0	1.65024	0.557	0.208	0	6	APOD
CLDN5	0	1.64652	0.731	0.048	0	6	CLDN5
HLA-A	0	1.64646	0.978	0.454	0	6	HLA-A
A2M	0	1.64291	0.855	0.112	0	6	A2M
CD34	0	1.6218	0.803	0.087	0	6	CD34
CLEC14A	0	1.58332	0.742	0.045	0	6	CLEC14A
PRSS23	0	1.57929	0.751	0.116	0	6	PRSS23
CA4	0	1.47574	0.488	0.015	0	6	CA4
TMSB4X	0	1.4608	0.999	0.706	0	6	TMSB4X
SPP1	0	1.45704	0.39	0.017	0	6	SPP1
RAMP2	0	1.4424	0.797	0.121	0	6	RAMP2
TM4SF18	0	1.43848	0.681	0.059	0	6	TM4SF18
BCAM	0	1.43592	0.869	0.203	0	6	BCAM
ESAM	0	1.42724	0.707	0.04	0	6	ESAM
PCAT19	0	1.38949	0.657	0.039	0	6	PCAT19
GIMAP7	0	1.373	0.637	0.046	0	6	GIMAP7
CRIP2	0	1.36934	0.738	0.09	0	6	CRIP2
EGFL7	0	1.36032	0.793	0.127	0	6	EGFL7
RAMP3	0	1.33971	0.496	0.025	0	6	RAMP3
GSN	0	1.32819	0.905	0.409	0	6	GSN
EHD4	0	1.32704	0.69	0.061	0	6	EHD4
SOCS3	0	1.2862	0.656	0.127	0	6	SOCS3
SLC9A3R2	0	1.28068	0.759	0.162	0	6	SLC9A3R2
SOX18	0	1.27993	0.571	0.04	0	6	SOX18
TNFSF10	0	1.27622	0.595	0.04	0	6	TNFSF10
RGCC	0	1.27288	0.35	0.027	0	6	RGCC
ANGPT2	0	1.27081	0.345	0.037	0	6	ANGPT2
ID1	0	1.26139	0.722	0.188	0	6	ID1
EMCN	0	1.26024	0.602	0.035	0	6	EMCN
KLF2	0	1.25675	0.777	0.249	0	6	KLF2
PALMD	0	1.20175	0.583	0.053	0	6	PALMD
ADGRL4	0	1.18891	0.549	0.03	0	6	ADGRL4
ETS2	0	1.18576	0.628	0.076	0	6	ETS2
ECSCR	0	1.17592	0.596	0.032	0	6	ECSCR
EFNA1	0	1.1661	0.561	0.037	0	6	EFNA1
CD74	0	1.16337	0.688	0.117	0	6	CD74
TXNIP	0	1.15974	0.824	0.391	0	6	TXNIP
ZFP361	0	1.15718	0.808	0.386	0	6	ZFP36
GPIHBP1	0	1.14537	0.495	0.024	0	6	GPIHBP1
CTHRC1	0	1.13891	0.472	0.029	0	6	CTHRC1
ANXA1	0	1.12374	0.651	0.1	0	6	ANXA1
NOTCH4	0	1.11378	0.549	0.048	0	6	NOTCH4
CAVIN1	0	1.10823	0.786	0.215	0	6	CAVIN1
AP1S2	0	1.09912	0.669	0.116	0	6	AP1S2
IGFBP72	0	1.09196	0.995	0.633	0	6	IGFBP7
SAT1	0	1.08158	0.883	0.476	0	6	SAT1
NOSTRIN	0	1.08058	0.67	0.128	0	6	NOSTRIN
FXYD5	0	1.05022	0.582	0.059	0	6	FXYD5
AFAP1L1	0	1.04481	0.488	0.031	0	6	AFAP1L1
VAMP5	0	1.02974	0.661	0.132	0	6	VAMP5
SOX17	0	1.0293	0.499	0.04	0	6	SOX17
GIMAP4	0	1.0284	0.526	0.036	0	6	GIMAP4
CALCRL	0	1.0224	0.522	0.042	0	6	CALCRL
GADD45A	0	1.01839	0.636	0.171	0	6	GADD45A
ROBO4	0	1.0179	0.476	0.021	0	6	ROBO4
GMFG	0	1.01544	0.506	0.029	0	6	GMFG
EMP1	0	1.01459	0.531	0.056	0	6	EMP1
ICAM2	0	1.01188	0.504	0.033	0	6	ICAM2
NFIB	0	1.00445	0.648	0.135	0	6	NFIB
S100A101	0	0.994197	0.922	0.481	0	6	S100A10
FKBP1A	0	0.989439	0.798	0.326	0	6	FKBP1A
LY6E1	0	0.986712	0.851	0.419	0	6	LY6E
TMEM88	0	0.981325	0.406	0.018	0	6	TMEM88
LCN6	0	0.978321	0.416	0.033	0	6	LCN6
NUAK1	0	0.978044	0.464	0.036	0	6	NUAK1
IFI16	0	0.977914	0.665	0.15	0	6	IFI16
CYYR1	0	0.976771	0.483	0.025	0	6	CYYR1
SLC3A2	0	0.972367	0.656	0.207	0	6	SLC3A2
LMO2	0	0.967182	0.476	0.054	0	6	LMO2
TSPAN7	0	0.960855	0.523	0.067	0	6	TSPAN7
HSPG2	0	0.959029	0.512	0.082	0	6	HSPG2
PSMB8	0	0.957068	0.573	0.092	0	6	PSMB8
SRGN	0	0.948254	0.594	0.068	0	6	SRGN
TSC22D1	0	0.947976	0.801	0.397	0	6	TSC22D1
CD59	0	0.94307	0.783	0.333	0	6	CD59
MYCT1	0	0.94027	0.472	0.025	0	6	MYCT1
DUSP1	0	0.939019	0.834	0.407	0	6	DUSP1
SNHG7	0	0.935419	0.759	0.293	0	6	SNHG7
TCF4	0	0.922321	0.726	0.254	0	6	TCF4
PSMB9	0	0.90834	0.525	0.066	0	6	PSMB9
IRF11	0	0.905417	0.608	0.197	0	6	IRF1
FAM110D	0	0.905011	0.408	0.02	0	6	FAM110D
CAV2	0	0.904227	0.605	0.122	0	6	CAV2
MGST21	0	0.900136	0.732	0.23	0	6	MGST2
HLA-DRB1	0	0.898928	0.572	0.068	0	6	HLA-DRB1
SELE	0	0.898796	0.255	0.01	0	6	SELE
TAGLN2	0	0.889892	0.711	0.24	0	6	TAGLN2
EPAS1	0	0.883959	0.536	0.088	0	6	EPAS1
DEPP1	0	0.881013	0.339	0.07	0	6	DEPP1
KANK3	0	0.879538	0.434	0.024	0	6	KANK3
ECM1	0	0.879224	0.321	0.023	0	6	ECM1
SLC2A3	0	0.877075	0.617	0.177	0	6	SLC2A3
IFITM2	0	0.876359	0.838	0.385	0	6	IFITM2
NFKBIA	0	0.862787	0.7	0.285	0	6	NFKBIA
LPAR6	0	0.860164	0.498	0.065	0	6	LPAR6
ADGRF5	0	0.855892	0.429	0.031	0	6	ADGRF5
FLI1	0	0.85568	0.414	0.022	0	6	FLI1
GIMAP1	0	0.854759	0.421	0.025	0	6	GIMAP1
ID3	0	0.854269	0.695	0.284	0	6	ID3
CCDC85B	0	0.85243	0.785	0.358	0	6	CCDC85B
SMTN	0	0.851991	0.481	0.074	0	6	SMTN
ETS1	0	0.847778	0.459	0.051	0	6	ETS1
IER2	0	0.847762	0.797	0.371	0	6	IER2
ITGA1	0	0.847761	0.407	0.03	0	6	ITGA1
PLK2	0	0.846566	0.533	0.101	0	6	PLK2
LDB2	0	0.844066	0.52	0.081	0	6	LDB2
IFITM1	0	0.84072	0.375	0.081	0	6	IFITM1
FAM84A	0	0.835607	0.361	0.082	0	6	FAM84A
HLA-F	0	0.830367	0.426	0.037	0	6	HLA-F
GADD45B1	0	0.82811	0.722	0.339	0	6	GADD45B
CDH5	0	0.827999	0.425	0.026	0	6	CDH5
TGFBR2	0	0.826966	0.435	0.044	0	6	TGFBR2
C2CD4B	0	0.825109	0.305	0.014	0	6	C2CD4B
ARHGAP29	0	0.805018	0.541	0.1	0	6	ARHGAP29
CXCL2	0	0.802026	0.272	0.031	0	6	CXCL2
KDR	0	0.796462	0.338	0.022	0	6	KDR
IL32	0	0.791464	0.482	0.148	0	6	IL32
MMRN2	0	0.787144	0.389	0.026	0	6	MMRN2
ACTN4	0	0.772326	0.583	0.168	0	6	ACTN4
FAM43A	0	0.7708	0.488	0.096	0	6	FAM43A
IFITM3	0	0.765631	0.962	0.706	0	6	IFITM3
SDCBP	0	0.7647	0.634	0.211	0	6	SDCBP
LIFR	0	0.762926	0.407	0.068	0	6	LIFR
CD93	0	0.754101	0.375	0.037	0	6	CD93
GIMAP8	0	0.752701	0.376	0.02	0	6	GIMAP8
PTMA	0	0.752521	0.992	0.896	0	6	PTMA
ID2	0	0.747967	0.69	0.278	0	6	ID2
TNFRSF4	0	0.744177	0.271	0.014	0	6	TNFRSF4
SLCO2B1	0	0.737616	0.334	0.025	0	6	SLCO2B1
LIMS1	0	0.734515	0.583	0.181	0	6	LIMS1
GIMAP6	0	0.7327	0.351	0.018	0	6	GIMAP6
TMEM204	0	0.72579	0.418	0.064	0	6	TMEM204
PIM3	0	0.721511	0.397	0.067	0	6	PIM3
LRRFIP1	0	0.72092	0.497	0.116	0	6	LRRFIP1
MTUS1	0	0.716014	0.467	0.113	0	6	MTUS1
CD320	0	0.714871	0.409	0.1	0	6	CD320
ARHGAP18	0	0.714813	0.376	0.066	0	6	ARHGAP18
HSPA2	0	0.709101	0.438	0.084	0	6	HSPA2
FAM13C	0	0.705843	0.348	0.046	0	6	FAM13C
ISG15	0	0.704593	0.441	0.115	0	6	ISG15
CAPN2	0	0.703843	0.537	0.141	0	6	CAPN2
CXorf36	0	0.703495	0.316	0.014	0	6	CXorf36
C1orf115	0	0.696506	0.463	0.105	0	6	C1orf115
APOL3	0	0.691657	0.352	0.024	0	6	APOL3
LMCD1	0	0.68827	0.447	0.102	0	6	LMCD1
CAVIN2	0	0.687148	0.389	0.066	0	6	CAVIN2
MEF2C	0	0.684678	0.588	0.193	0	6	MEF2C
STOM	0	0.680875	0.502	0.125	0	6	STOM
DYSF	0	0.676622	0.283	0.013	0	6	DYSF
FLT1	0	0.676546	0.376	0.042	0	6	FLT1
CRHBP	0	0.671347	0.302	0.032	0	6	CRHBP
PDLIM1	0	0.670249	0.385	0.061	0	6	PDLIM1
RGS3	0	0.670102	0.37	0.098	0	6	RGS3
GPR146	0	0.668424	0.296	0.015	0	6	GPR146
ERG	0	0.666171	0.322	0.016	0	6	ERG
MSN	0	0.665764	0.474	0.11	0	6	MSN
TMEM173	0	0.663762	0.409	0.065	0	6	TMEM173
CLEC2B	0	0.662514	0.352	0.042	0	6	CLEC2B
IFI44L	0	0.662481	0.382	0.063	0	6	IFI44L
ELK3	0	0.654991	0.38	0.046	0	6	ELK3
TIE1	0	0.65195	0.343	0.023	0	6	TIE1
BTNL9	0	0.64897	0.293	0.036	0	6	BTNL9
XAF1	0	0.643551	0.351	0.049	0	6	XAF1
EFNB2	0	0.642363	0.317	0.027	0	6	EFNB2
SOCS2	0	0.640629	0.513	0.133	0	6	SOCS2
TNFAIP8L1	0	0.639318	0.322	0.037	0	6	TNFAIP8L1
SNCG	0	0.638221	0.35	0.051	0	6	SNCG
CD300LG	0	0.633709	0.254	0.023	0	6	CD300LG
CLIC1	0	0.630765	0.665	0.276	0	6	CLIC1
EGLN1	0	0.627625	0.402	0.095	0	6	EGLN1
PRCP	0	0.62656	0.382	0.103	0	6	PRCP
PTPRB	0	0.626444	0.328	0.024	0	6	PTPRB
UTRN	0	0.625252	0.448	0.089	0	6	UTRN
TSPO	0	0.621413	0.517	0.144	0	6	TSPO
SYPL1	0	0.618985	0.57	0.192	0	6	SYPL1
NRP2	0	0.617088	0.296	0.025	0	6	NRP2
TIMP31	0	0.614725	0.772	0.284	0	6	TIMP3
PDE2A	0	0.612814	0.28	0.013	0	6	PDE2A
MGLL	0	0.611376	0.367	0.081	0	6	MGLL
NPDC1	0	0.610149	0.56	0.197	0	6	NPDC1
TPD52L1	0	0.609824	0.322	0.054	0	6	TPD52L1
LAYN	0	0.608414	0.345	0.055	0	6	LAYN
HDAC7	0	0.605748	0.393	0.065	0	6	HDAC7
F8	0	0.603864	0.413	0.093	0	6	F8
FCGRT2	0	0.600628	0.699	0.278	0	6	FCGRT
MT2A	0	0.597764	0.436	0.125	0	6	MT2A
S100A162	0	0.596673	0.714	0.302	0	6	S100A16
SMAD1	0	0.594244	0.293	0.035	0	6	SMAD1
SORBS2	0	0.589882	0.298	0.043	0	6	SORBS2
FAM241A	0	0.588882	0.314	0.031	0	6	FAM241A
RFLNB	0	0.587905	0.269	0.032	0	6	RFLNB
LUZP1	0	0.586983	0.429	0.099	0	6	LUZP1
TACC1	0	0.586213	0.515	0.164	0	6	TACC1
SH3BGRL3	0	0.585408	0.576	0.186	0	6	SH3BGRL3
FLOT1	0	0.585091	0.442	0.116	0	6	FLOT1
RASIP1	0	0.5849	0.351	0.049	0	6	RASIP1
NES	0	0.584842	0.359	0.077	0	6	NES
HLA-DRA	0	0.583438	0.459	0.052	0	6	HLA-DRA
IFIT3	0	0.577928	0.296	0.055	0	6	IFIT3
GGT5	0	0.577859	0.285	0.027	0	6	GGT5
ADCY4	0	0.577313	0.283	0.02	0	6	ADCY4
PRKCH	0	0.575832	0.298	0.02	0	6	PRKCH
PLS3	0	0.575506	0.406	0.11	0	6	PLS3
IFNGR1	0	0.569369	0.414	0.1	0	6	IFNGR1
PODXL	0	0.56835	0.28	0.027	0	6	PODXL
LEPR	0	0.565341	0.292	0.025	0	6	LEPR
ADAM15	0	0.565311	0.324	0.042	0	6	ADAM15
AC020916.1	0	0.56139	0.298	0.053	0	6	AC020916.1
DLL4	0	0.560793	0.269	0.015	0	6	DLL4
BAALC	0	0.560094	0.254	0.009	0	6	BAALC
ITGA10	0	0.559221	0.266	0.022	0	6	ITGA10
RPS61	0	0.558126	0.99	0.927	0	6	RPS6
ARL4A	0	0.557609	0.514	0.169	0	6	ARL4A
ARHGEF15	0	0.555071	0.26	0.012	0	6	ARHGEF15
ENTPD1	0	0.54943	0.29	0.023	0	6	ENTPD1
PECAM1	0	0.546741	0.275	0.022	0	6	PECAM1
SP100	0	0.537392	0.377	0.075	0	6	SP100
FAM198B	0	0.534072	0.324	0.069	0	6	FAM198B
MAP3K11	0	0.533747	0.371	0.08	0	6	MAP3K11
CSRP2	0	0.528512	0.257	0.046	0	6	CSRP2
MX1	0	0.524692	0.278	0.047	0	6	MX1
DUSP6	0	0.522995	0.33	0.067	0	6	DUSP6
PPFIBP1	0	0.520204	0.411	0.116	0	6	PPFIBP1
NRP1	0	0.519981	0.323	0.05	0	6	NRP1
TESC	0	0.518767	0.303	0.049	0	6	TESC
UBE2L6	0	0.506662	0.34	0.072	0	6	UBE2L6
IER3	0	0.504795	0.366	0.078	0	6	IER3
ABCB1	0	0.504426	0.252	0.017	0	6	ABCB1
MCAM	0	0.50193	0.258	0.034	0	6	MCAM
BHLHE40	0	0.496737	0.255	0.033	0	6	BHLHE40
RASAL2	0	0.496592	0.322	0.057	0	6	RASAL2
ARPC1B	0	0.491514	0.343	0.074	0	6	ARPC1B
VSIR	0	0.488816	0.276	0.039	0	6	VSIR
HOXD9	0	0.482365	0.347	0.078	0	6	HOXD9
PKP4	0	0.480471	0.283	0.046	0	6	PKP4
FYN	0	0.476869	0.33	0.079	0	6	FYN
TPT1	0	0.476677	0.982	0.882	0	6	TPT1
FAM171A1	0	0.470179	0.29	0.052	0	6	FAM171A1
RPL310	0	0.464859	0.997	0.953	0	6	RPL3
HLA-DPA1	0	0.461059	0.392	0.068	0	6	HLA-DPA1
ODF2L	0	0.44693	0.341	0.076	0	6	ODF2L
GBP4	0	0.443624	0.265	0.05	0	6	GBP4
SWAP70	0	0.431927	0.28	0.058	0	6	SWAP70
BACE2	0	0.430947	0.259	0.05	0	6	BACE2
NFKBIZ	0	0.411119	0.293	0.054	0	6	NFKBIZ
CYBA	0	0.380778	0.344	0.072	0	6	CYBA
HLA-DPB1	0	0.303527	0.317	0.062	0	6	HLA-DPB1
CDKN1A	4.13034e-304	0.4839	0.302	0.068	1.05985e-299	6	CDKN1A
CTSZ	5.90259e-304	0.413152	0.254	0.049	1.51461e-299	6	CTSZ
JUNB1	5.71377e-301	0.713018	0.883	0.613	1.46615e-296	6	JUNB
TMOD3	5.3368e-300	0.446305	0.331	0.081	1.36942e-295	6	TMOD3
LGALS31	7.71605e-300	0.557256	0.607	0.227	1.97994e-295	6	LGALS3
STARD3	4.86809e-295	0.435937	0.323	0.078	1.24915e-290	6	STARD3
DGKE	3.90005e-294	0.418018	0.251	0.05	1.00075e-289	6	DGKE
CEBPD1	1.219e-293	0.711819	0.531	0.195	3.12795e-289	6	CEBPD
CTNNAL12	2.99717e-293	0.578074	0.541	0.196	7.69075e-289	6	CTNNAL1
VWA1	5.44832e-290	0.531385	0.444	0.138	1.39804e-285	6	VWA1
ARHGDIB	7.59936e-288	0.396777	0.287	0.063	1.94999e-283	6	ARHGDIB
CCND3	2.03793e-285	0.427986	0.341	0.087	5.22934e-281	6	CCND3
THBD	2.35527e-285	0.44561	0.297	0.068	6.04362e-281	6	THBD
ITGA61	1.17312e-284	0.501005	0.399	0.118	3.01023e-280	6	ITGA6
CDC42EP1	1.59685e-283	0.407883	0.284	0.064	4.09753e-279	6	CDC42EP1
LTC4S	8.28915e-282	0.46288	0.274	0.06	2.127e-277	6	LTC4S
KLF41	1.22501e-280	0.655258	0.517	0.19	3.14338e-276	6	KLF4
ANXA21	5.11543e-279	0.478208	0.669	0.269	1.31262e-274	6	ANXA2
IRF9	4.37337e-276	0.441577	0.322	0.081	1.12221e-271	6	IRF9
UBE2J1	4.62579e-276	0.48054	0.371	0.106	1.18698e-271	6	UBE2J1
BST22	1.05777e-275	0.561834	0.737	0.32	2.71425e-271	6	BST2
TSPAN41	1.43807e-275	0.49927	0.475	0.158	3.6901e-271	6	TSPAN4
CFLAR	1.33416e-274	0.491078	0.445	0.144	3.42344e-270	6	CFLAR
NCK1	2.07326e-274	0.43168	0.326	0.084	5.31998e-270	6	NCK1
SLC7A51	4.81262e-270	0.585801	0.351	0.1	1.23492e-265	6	SLC7A5
ZBTB16	8.39022e-270	0.415144	0.273	0.062	2.15293e-265	6	ZBTB16
SEC14L11	2.58586e-264	0.50188	0.469	0.163	6.63532e-260	6	SEC14L1
GYPC	9.05152e-264	0.439616	0.338	0.09	2.32262e-259	6	GYPC
SERTAD1	2.71308e-262	0.530466	0.487	0.172	6.96176e-258	6	SERTAD1
FOXP1	1.63784e-261	0.463419	0.451	0.152	4.2027e-257	6	FOXP1
NECTIN2	2.44258e-261	0.469701	0.413	0.131	6.26766e-257	6	NECTIN2
HES1	7.83561e-261	0.779072	0.615	0.257	2.01062e-256	6	HES1
CDC37	1.84914e-259	0.531556	0.618	0.263	4.74488e-255	6	CDC37
SYNE1	8.56892e-258	0.40771	0.326	0.087	2.19878e-253	6	SYNE1
IQGAP1	1.89394e-257	0.45336	0.368	0.109	4.85984e-253	6	IQGAP1
ENG1	1.33413e-256	0.47405	0.722	0.308	3.42338e-252	6	ENG
PSME1	5.39562e-256	0.554231	0.647	0.287	1.38452e-251	6	PSME1
LDHA1	1.02201e-255	0.602625	0.677	0.322	2.62246e-251	6	LDHA
TSC22D31	2.79436e-254	0.586167	0.514	0.193	7.17033e-250	6	TSC22D3
KIAA0355	3.9539e-250	0.418337	0.3	0.078	1.01457e-245	6	KIAA0355
WWTR1	9.27931e-250	0.453874	0.386	0.119	2.38107e-245	6	WWTR1
HSPB1	1.16221e-249	0.63036	0.855	0.55	2.98223e-245	6	HSPB1
CDC42EP4	3.09828e-247	0.407847	0.327	0.091	7.95018e-243	6	CDC42EP4
NCOA7	5.09286e-247	0.434469	0.314	0.085	1.30683e-242	6	NCOA7
PRMT1	5.60401e-246	0.58306	0.7	0.349	1.43799e-241	6	PRMT1
MYL12A	1.23707e-245	0.561296	0.842	0.53	3.17433e-241	6	MYL12A
RDX	1.38761e-245	0.639143	0.777	0.435	3.56061e-241	6	RDX
VIM1	2.9171e-244	0.41354	0.977	0.771	7.48529e-240	6	VIM
C14orf119	5.96929e-244	0.492705	0.424	0.144	1.53172e-239	6	C14orf119
YWHAH	1.68339e-241	0.431271	0.412	0.135	4.31958e-237	6	YWHAH
HSD17B11	3.04628e-241	0.408699	0.381	0.118	7.81674e-237	6	HSD17B11
IGFBP41	9.63959e-241	0.634837	0.74	0.383	2.47352e-236	6	IGFBP4
MAPK3	1.84381e-236	0.390834	0.299	0.08	4.73122e-232	6	MAPK3
ZFP36L21	3.41042e-236	0.596539	0.755	0.417	8.75114e-232	6	ZFP36L2
NDRG1	1.10386e-235	0.376281	0.27	0.067	2.83251e-231	6	NDRG1
SCARB1	3.0461e-235	0.412428	0.259	0.063	7.8163e-231	6	SCARB1
ELF1	1.03849e-234	0.367747	0.317	0.088	2.66476e-230	6	ELF1
ADM	1.00232e-233	0.536361	0.315	0.088	2.57196e-229	6	ADM
TAPBP	4.88057e-232	0.377126	0.34	0.1	1.25235e-227	6	TAPBP
TNFRSF1A	1.90985e-230	0.370394	0.335	0.096	4.90068e-226	6	TNFRSF1A
NUDT14	3.789e-230	0.345371	0.273	0.069	9.72257e-226	6	NUDT14
RPL102	5.82796e-229	0.345883	0.995	0.936	1.49545e-224	6	RPL10
TRIM47	1.79571e-227	0.374669	0.329	0.096	4.6078e-223	6	TRIM47
MYH9	8.26076e-225	0.428098	0.471	0.175	2.11971e-220	6	MYH9
GALNT18	3.86376e-223	0.389743	0.264	0.068	9.9144e-219	6	GALNT18
FKBP9	1.74526e-222	0.367337	0.301	0.084	4.47834e-218	6	FKBP9
FDPS	4.53859e-219	0.497234	0.511	0.205	1.1646e-214	6	FDPS
GSDMD	1.70876e-218	0.349199	0.281	0.075	4.38469e-214	6	GSDMD
RPS22	4.16565e-217	0.347719	0.991	0.931	1.0689e-212	6	RPS2
LIMS2	1.0986e-216	0.34506	0.292	0.081	2.81901e-212	6	LIMS2
PLK3	1.45812e-215	0.369237	0.338	0.104	3.74152e-211	6	PLK3
CALCOCO2	6.21092e-215	0.393367	0.323	0.097	1.59372e-210	6	CALCOCO2
TMSB101	2.70639e-214	0.420251	0.98	0.866	6.94459e-210	6	TMSB10
GNAI2	4.94425e-210	0.48874	0.529	0.225	1.26869e-205	6	GNAI2
GUK1	6.20286e-210	0.523341	0.72	0.387	1.59165e-205	6	GUK1
LAP3	7.94147e-210	0.380729	0.314	0.094	2.03778e-205	6	LAP3
IGFBP2	1.83557e-209	0.487354	0.634	0.285	4.71008e-205	6	IGFBP2
CAPZA2	2.06772e-209	0.475868	0.541	0.232	5.30576e-205	6	CAPZA2
ST6GALNAC1	1.11551e-208	0.363335	0.276	0.076	2.8624e-204	6	ST6GALNAC1
UBC	1.95595e-208	0.454012	0.942	0.784	5.01898e-204	6	UBC
PSME2	6.17923e-207	0.481451	0.499	0.204	1.58559e-202	6	PSME2
RAB11A	6.16388e-206	0.473415	0.573	0.256	1.58165e-201	6	RAB11A
FN1	1.20454e-205	0.353687	0.293	0.083	3.09086e-201	6	FN1
ZFP36L11	2.07127e-201	0.503582	0.795	0.479	5.31487e-197	6	ZFP36L1
VASP	1.47886e-197	0.328047	0.286	0.083	3.79476e-193	6	VASP
SPTBN11	2.65672e-195	0.397855	0.601	0.268	6.81715e-191	6	SPTBN1
PPP1R15A	1.96285e-194	0.432782	0.661	0.329	5.03666e-190	6	PPP1R15A
NECAP2	1.58292e-192	0.394545	0.387	0.139	4.06178e-188	6	NECAP2
CTSH	1.81661e-191	0.341551	0.284	0.083	4.66143e-187	6	CTSH
CD151	1.32229e-190	0.406859	0.515	0.216	3.39301e-186	6	CD151
CORO1B	9.33794e-190	0.315538	0.301	0.092	2.39611e-185	6	CORO1B
PLSCR1	1.31857e-189	0.335018	0.365	0.125	3.38345e-185	6	PLSCR1
CHST12	2.76675e-186	0.359209	0.339	0.113	7.09948e-182	6	CHST12
SH3BP51	2.08175e-183	0.438923	0.472	0.196	5.34177e-179	6	SH3BP5
CNN31	1.01044e-181	0.4312	0.587	0.273	2.5928e-177	6	CNN3
FOS1	1.49452e-181	0.519152	0.849	0.645	3.83494e-177	6	FOS
S100A11	2.58603e-179	0.390743	0.593	0.28	6.63576e-175	6	S100A11
GRAMD1A	4.80595e-177	0.292145	0.252	0.072	1.23321e-172	6	GRAMD1A
RILPL2	6.6095e-175	0.353078	0.266	0.08	1.696e-170	6	RILPL2
LMNA	1.08163e-174	0.522268	0.661	0.363	2.77546e-170	6	LMNA
COX7A1	2.01723e-174	0.362499	0.414	0.158	5.17622e-170	6	COX7A1
MIDN	2.57307e-173	0.334328	0.348	0.123	6.60248e-169	6	MIDN
CTNNB11	1.32677e-172	0.425204	0.451	0.186	3.40449e-168	6	CTNNB1
CCDC50	1.65181e-168	0.326241	0.333	0.116	4.23855e-164	6	CCDC50
SLC39A14	2.77533e-168	0.342592	0.259	0.079	7.12149e-164	6	SLC39A14
RALB	3.70149e-167	0.344904	0.306	0.104	9.49801e-163	6	RALB
RPS4X2	4.62544e-167	0.321068	0.984	0.894	1.18689e-162	6	RPS4X
TMEM219	1.54777e-166	0.389729	0.488	0.213	3.97157e-162	6	TMEM219
CSRP1	3.30852e-165	0.308877	0.367	0.134	8.48966e-161	6	CSRP1
GNAQ	6.78805e-165	0.286412	0.33	0.116	1.74181e-160	6	GNAQ
RPL261	2.77479e-164	0.316168	0.977	0.881	7.12011e-160	6	RPL26
LIMCH11	9.16419e-164	0.358189	0.323	0.114	2.35153e-159	6	LIMCH1
NOP531	5.50445e-163	0.422734	0.796	0.51	1.41244e-158	6	NOP53
PFN1	4.88869e-159	0.440459	0.815	0.534	1.25444e-154	6	PFN1
TMEM243	6.71788e-156	0.291237	0.298	0.101	1.72381e-151	6	TMEM243
DAB2	8.63884e-155	0.322735	0.314	0.111	2.21673e-150	6	DAB2
EIF3D	1.17107e-154	0.378055	0.553	0.266	3.00497e-150	6	EIF3D
ARHGEF3	3.44862e-154	0.265197	0.254	0.079	8.84916e-150	6	ARHGEF3
ARL2	4.5217e-154	0.355058	0.457	0.198	1.16027e-149	6	ARL2
KLF3	3.24524e-153	0.29626	0.285	0.096	8.32728e-149	6	KLF3
WT12	2.03957e-152	0.285434	0.399	0.157	5.23353e-148	6	WT1
GNAS	2.96193e-152	0.436141	0.709	0.409	7.60032e-148	6	GNAS
TSNAX	6.73652e-151	0.329413	0.368	0.145	1.72859e-146	6	TSNAX
BTG2	4.29513e-146	0.37172	0.529	0.255	1.10213e-141	6	BTG2
BTG1	1.9041e-145	0.364701	0.844	0.591	4.88593e-141	6	BTG1
TPM31	1.10302e-144	0.320476	0.468	0.211	2.83034e-140	6	TPM3
MGMT	1.15641e-144	0.290855	0.408	0.168	2.96734e-140	6	MGMT
RAP1A	8.75338e-144	0.299777	0.323	0.12	2.24612e-139	6	RAP1A
RRAS	9.37537e-141	0.277651	0.253	0.082	2.40572e-136	6	RRAS
HTRA1	9.01987e-140	0.301407	0.32	0.117	2.3145e-135	6	HTRA1
C19orf66	1.68331e-139	0.264876	0.288	0.102	4.31938e-135	6	C19orf66
GSTK1	3.39623e-139	0.284229	0.398	0.165	8.71474e-135	6	GSTK1
CAST	1.48796e-138	0.313648	0.4	0.17	3.8181e-134	6	CAST
PTTG1IP	1.51867e-138	0.313109	0.461	0.207	3.8969e-134	6	PTTG1IP
PEA15	3.16172e-138	0.276733	0.274	0.095	8.11298e-134	6	PEA15
SNAP23	3.57346e-138	0.274213	0.266	0.091	9.1695e-134	6	SNAP23
TRIM56	8.44193e-138	0.281146	0.35	0.138	2.1662e-133	6	TRIM56
CALM1	4.79839e-136	0.403005	0.844	0.58	1.23127e-131	6	CALM1
MGAT1	1.47715e-135	0.273207	0.323	0.124	3.79037e-131	6	MGAT1
PTPN12	2.1859e-135	0.251135	0.285	0.102	5.60901e-131	6	PTPN12
2023-06-01	2.27394e-135	0.368359	0.873	0.709	5.83492e-131	6	JUN
PON2	3.06355e-135	0.312926	0.318	0.123	7.86108e-131	6	PON2
STAT3	5.92233e-135	0.317554	0.539	0.267	1.51967e-130	6	STAT3
TFPI	1.97333e-134	0.260272	0.252	0.084	5.06355e-130	6	TFPI
LEPROT1	4.38407e-133	0.354592	0.528	0.262	1.12495e-128	6	LEPROT
RPS282	2.22229e-132	0.295344	0.979	0.896	5.70239e-128	6	RPS28
RHOB	8.41852e-132	0.388784	0.722	0.437	2.16019e-127	6	RHOB
IFI6	1.36506e-131	0.381833	0.544	0.275	3.50273e-127	6	IFI6
CAP1	1.60728e-131	0.337787	0.482	0.23	4.12427e-127	6	CAP1
RSRP1	8.70448e-131	0.271102	0.517	0.249	2.23357e-126	6	RSRP1
NUCB1	1.13246e-130	0.304112	0.446	0.203	2.90589e-126	6	NUCB1
FEZ2	1.97577e-130	0.291345	0.44	0.199	5.06982e-126	6	FEZ2
DAD1	1.63035e-128	0.365169	0.695	0.413	4.18347e-124	6	DAD1
OSBPL1A	4.91848e-128	0.287738	0.303	0.116	1.26208e-123	6	OSBPL1A
SNX3	7.82656e-127	0.361487	0.727	0.442	2.0083e-122	6	SNX3
RPS141	4.71391e-126	0.257881	0.99	0.926	1.20959e-121	6	RPS14
KLF6	2.43512e-125	0.354701	0.514	0.261	6.24853e-121	6	KLF6
SLC39A1	1.16265e-124	0.290963	0.279	0.104	2.98336e-120	6	SLC39A1
ZNHIT1	4.447e-124	0.313757	0.503	0.248	1.1411e-119	6	ZNHIT1
CFAP20	1.40003e-122	0.317477	0.33	0.135	3.59248e-118	6	CFAP20
RPL122	2.04379e-121	0.265572	0.973	0.878	5.24437e-117	6	RPL12
RACK12	3.85054e-121	0.270847	0.951	0.819	9.88048e-117	6	RACK1
TMEM50A	6.88334e-121	0.316682	0.472	0.227	1.76626e-116	6	TMEM50A
HSD17B12	9.44451e-121	0.295605	0.369	0.159	2.42346e-116	6	HSD17B12
RPS92	1.55623e-120	0.275007	0.976	0.892	3.99329e-116	6	RPS9
TMBIM4	2.28455e-120	0.305635	0.496	0.247	5.86217e-116	6	TMBIM4
SNHG8	1.829e-119	0.322201	0.575	0.308	4.69323e-115	6	SNHG8
KCTD12	9.42061e-118	0.281893	0.356	0.152	2.41733e-113	6	KCTD12
DSTN	4.2662e-117	0.280359	0.731	0.441	1.09471e-112	6	DSTN
SCP21	5.76598e-116	0.294218	0.473	0.23	1.47955e-111	6	SCP2
SOD2	4.27295e-114	0.272321	0.263	0.1	1.09644e-109	6	SOD2
S100A61	1.29306e-113	0.371994	0.651	0.377	3.31799e-109	6	S100A6
NAA38	2.45411e-113	0.329846	0.429	0.206	6.29726e-109	6	NAA38
NEAT11	6.18622e-113	0.322724	0.844	0.574	1.58738e-108	6	NEAT1
ARHGDIA	5.68554e-111	0.258949	0.387	0.176	1.45891e-106	6	ARHGDIA
OS9	1.57583e-110	0.274687	0.396	0.183	4.04358e-106	6	OS9
BNIP2	7.25198e-110	0.257542	0.313	0.131	1.86086e-105	6	BNIP2
EEF1D	7.20458e-109	0.311699	0.861	0.648	1.8487e-104	6	EEF1D
RTF2	6.05046e-108	0.275211	0.438	0.212	1.55255e-103	6	RTF2
INSR1	1.17867e-107	0.607427	0.405	0.203	3.02447e-103	6	INSR
SERPINB6	1.17881e-107	0.265742	0.428	0.205	3.02484e-103	6	SERPINB6
SSBP4	2.7692e-107	0.25909	0.365	0.162	7.10578e-103	6	SSBP4
COL4A1	5.01142e-107	0.306383	0.3	0.124	1.28593e-102	6	COL4A1
ABHD17A	5.40175e-107	0.271342	0.282	0.113	1.38609e-102	6	ABHD17A
TPRKB	7.47709e-106	0.303156	0.423	0.207	1.91862e-101	6	TPRKB
UBXN1	3.20261e-105	0.292906	0.565	0.308	8.21789e-101	6	UBXN1
CAPNS1	8.31202e-105	0.270728	0.356	0.16	2.13286e-100	6	CAPNS1
DDX3X	2.07159e-103	0.251418	0.467	0.235	5.3157e-99	6	DDX3X
YBX3	6.66997e-103	0.250773	0.571	0.311	1.71152e-98	6	YBX3
ARGLU1	6.94032e-103	0.29896	0.672	0.41	1.78089e-98	6	ARGLU1
METTL9	1.78253e-102	0.261973	0.347	0.155	4.57397e-98	6	METTL9
CFL1	2.31723e-102	0.32836	0.859	0.649	5.94601e-98	6	CFL1
RAB131	4.79731e-102	0.256453	0.585	0.321	1.23099e-97	6	RAB13
RAB5C	6.79948e-102	0.265911	0.436	0.214	1.74475e-97	6	RAB5C
ANXA51	5.54905e-99	0.269251	0.586	0.324	1.42389e-94	6	ANXA5
CCNL1	1.10519e-98	0.250111	0.618	0.36	2.83592e-94	6	CCNL1
JAK1	1.11436e-98	0.250032	0.359	0.165	2.85944e-94	6	JAK1
EIF3E2	1.79462e-96	0.304575	0.772	0.529	4.60499e-92	6	EIF3E
RHOC1	6.89521e-95	0.298801	0.672	0.413	1.76931e-90	6	RHOC
WASF2	1.45702e-93	0.273748	0.494	0.264	3.73872e-89	6	WASF2
APP	2.97985e-93	0.288727	0.647	0.39	7.64628e-89	6	APP
SQSTM11	4.45758e-92	0.280462	0.539	0.302	1.14381e-87	6	SQSTM1
ATF3	1.70853e-89	0.261704	0.284	0.124	4.3841e-85	6	ATF3
RRAGA	6.16556e-89	0.251712	0.389	0.193	1.58208e-84	6	RRAGA
SERBP1	1.46264e-84	0.264791	0.643	0.401	3.75313e-80	6	SERBP1
RAC1	3.46194e-82	0.267777	0.805	0.58	8.88335e-78	6	RAC1
DDIT4	5.08114e-82	0.334938	0.452	0.249	1.30382e-77	6	DDIT4
ACTB	1.31751e-81	0.299716	0.98	0.883	3.38074e-77	6	ACTB
DNAJA1	2.51845e-80	0.261914	0.658	0.414	6.46235e-76	6	DNAJA1
VAMP2	7.2454e-77	0.261948	0.637	0.406	1.85917e-72	6	VAMP2
H1FX1	9.17793e-71	0.25767	0.535	0.323	2.35506e-66	6	H1FX
ZFYVE21	3.63013e-66	0.251155	0.454	0.263	9.3149e-62	6	ZFYVE21
JUND	5.44975e-66	0.291946	0.561	0.356	1.39841e-61	6	JUND
HSPA1A	2.88443e-52	0.299083	0.773	0.585	7.40145e-48	6	HSPA1A
VWF1	0	1.73553	0.585	0.093	0	7	VWF
A2M1	0	1.66702	0.658	0.136	0	7	A2M
IFI271	0	1.56809	0.693	0.187	0	7	IFI27
GNG111	0	1.54852	0.766	0.197	0	7	GNG11
RBP71	0	1.51197	0.487	0.077	0	7	RBP7
HLA-E1	0	1.48636	0.777	0.254	0	7	HLA-E
HLA-B1	0	1.4815	0.834	0.303	0	7	HLA-B
MGP1	0	1.43146	0.777	0.345	0	7	MGP
CLDN51	0	1.42769	0.421	0.078	0	7	CLDN5
SPARCL11	0	1.40219	0.905	0.4	0	7	SPARCL1
B2M1	0	1.39618	0.981	0.743	0	7	B2M
SLC9A3R21	0	1.39076	0.566	0.183	0	7	SLC9A3R2
ID11	0	1.35886	0.583	0.205	0	7	ID1
TM4SF11	0	1.32663	0.657	0.198	0	7	TM4SF1
GIMAP71	0	1.26406	0.397	0.07	0	7	GIMAP7
NOTCH41	0	1.25541	0.36	0.068	0	7	NOTCH4
CAV11	0	1.25446	0.656	0.235	0	7	CAV1
CLEC14A1	0	1.24513	0.414	0.076	0	7	CLEC14A
RAMP21	0	1.24146	0.521	0.148	0	7	RAMP2
KLF21	0	1.22468	0.635	0.266	0	7	KLF2
HLA-A1	0	1.2015	0.825	0.472	0	7	HLA-A
GSN1	0	1.17557	0.761	0.426	0	7	GSN
CRIP21	0	1.16876	0.464	0.117	0	7	CRIP2
BCAM1	0	1.16387	0.606	0.229	0	7	BCAM
CD341	0	1.16383	0.471	0.119	0	7	CD34
HLA-C1	0	1.15582	0.735	0.344	0	7	HLA-C
EGFL71	0	1.15406	0.517	0.155	0	7	EGFL7
EHD41	0	1.12806	0.376	0.09	0	7	EHD4
SOX181	0	1.12543	0.351	0.062	0	7	SOX18
TMSB4X1	0	1.10374	0.963	0.713	0	7	TMSB4X
PALMD1	0	1.08604	0.356	0.075	0	7	PALMD
EMCN1	0	1.08108	0.333	0.06	0	7	EMCN
LCN61	0	1.07765	0.283	0.047	0	7	LCN6
SRGN1	0	1.07486	0.378	0.089	0	7	SRGN
CALCRL1	0	1.06529	0.31	0.063	0	7	CALCRL
PCAT191	0	0.983294	0.322	0.069	0	7	PCAT19
ESAM1	0	0.983052	0.333	0.073	0	7	ESAM
CD741	0	0.750225	0.501	0.138	0	7	CD74
ADGRF51	3.47622e-304	0.992679	0.262	0.048	8.91997e-300	7	ADGRF5
ANXA11	1.05349e-295	1.07459	0.426	0.123	2.70327e-291	7	ANXA1
ADGRL41	2.98711e-292	0.89995	0.276	0.054	7.66493e-288	7	ADGRL4
NUAK11	7.11326e-292	0.953477	0.274	0.055	1.82526e-287	7	NUAK1
PTMA1	1.88383e-286	0.680494	0.949	0.9	4.8339e-282	7	PTMA
ITM2A1	1.99055e-284	1.05779	0.513	0.182	5.10776e-280	7	ITM2A
GIMAP41	1.4947e-282	0.87869	0.283	0.059	3.83541e-278	7	GIMAP4
HLA-DRB11	7.2519e-281	0.718802	0.358	0.089	1.86084e-276	7	HLA-DRB1
ECSCR1	1.43559e-271	0.851889	0.281	0.06	3.68372e-267	7	ECSCR
SOX171	2.46918e-268	1.06843	0.28	0.061	6.33591e-264	7	SOX17
ETS21	2.85145e-251	1.03256	0.355	0.101	7.31682e-247	7	ETS2
TNFSF101	3.37297e-248	0.914437	0.289	0.068	8.65505e-244	7	TNFSF10
EFNA11	5.69847e-244	0.885461	0.273	0.062	1.46223e-239	7	EFNA1
PRSS231	7.31015e-244	1.02254	0.429	0.145	1.87578e-239	7	PRSS23
EPAS11	4.04456e-229	1.02164	0.35	0.106	1.03783e-224	7	EPAS1
TXNIP1	1.36303e-228	1.0807	0.674	0.407	3.49754e-224	7	TXNIP
HLA-DRA1	1.3255e-217	0.361219	0.285	0.069	3.40123e-213	7	HLA-DRA
MALAT11	1.96896e-211	0.523309	0.995	0.965	5.05236e-207	7	MALAT1
FXYD51	3.94287e-209	0.852028	0.303	0.084	1.01174e-204	7	FXYD5
LIFR1	1.5836e-204	0.97509	0.29	0.08	4.06352e-200	7	LIFR
CTGF1	7.23773e-199	0.974772	0.435	0.166	1.8572e-194	7	CTGF
TMSB102	4.98593e-194	0.605568	0.942	0.87	1.27939e-189	7	TMSB10
CAVIN11	3.74995e-184	0.862246	0.514	0.241	9.62238e-180	7	CAVIN1
S100A102	4.315e-184	0.790286	0.735	0.499	1.10723e-179	7	S100A10
TM4SF181	1.82779e-178	0.860737	0.299	0.092	4.69011e-174	7	TM4SF18
ETS11	1.70776e-174	0.848362	0.252	0.07	4.38212e-170	7	ETS1
SOCS31	2.43457e-174	1.00862	0.393	0.151	6.2471e-170	7	SOCS3
NFIB1	3.57835e-169	0.904361	0.393	0.159	9.18204e-165	7	NFIB
IFI161	1.14614e-167	0.881349	0.413	0.174	2.941e-163	7	IFI16
UTRN1	6.55751e-167	0.894615	0.307	0.103	1.68266e-162	7	UTRN
LRRFIP11	5.60306e-164	0.904472	0.347	0.131	1.43774e-159	7	LRRFIP1
HSPG21	1.82502e-158	0.891015	0.3	0.101	4.68301e-154	7	HSPG2
IFITM31	2.09962e-155	0.614307	0.843	0.717	5.38763e-151	7	IFITM3
TCF41	7.57866e-151	0.884861	0.51	0.275	1.94468e-146	7	TCF4
IRF12	1.84809e-150	0.994541	0.444	0.214	4.7422e-146	7	IRF1
LDB21	1.26976e-146	0.804484	0.292	0.102	3.2582e-142	7	LDB2
EMP11	2.40769e-143	0.727079	0.255	0.081	6.17814e-139	7	EMP1
IER21	2.77989e-143	0.770992	0.63	0.388	7.1332e-139	7	IER2
ARHGAP291	2.73259e-141	0.812312	0.319	0.121	7.01182e-137	7	ARHGAP29
IGFBP73	1.7784e-139	0.366827	0.88	0.646	4.56338e-135	7	IGFBP7
PSMB91	8.29585e-133	0.767254	0.262	0.09	2.12871e-128	7	PSMB9
TIMP32	8.05745e-132	0.667935	0.572	0.304	2.06754e-127	7	TIMP3
MEF2C1	1.63134e-128	0.940693	0.418	0.209	4.18602e-124	7	MEF2C
NEAT12	2.02891e-127	0.733865	0.767	0.583	5.20619e-123	7	NEAT1
NOSTRIN1	5.0503e-127	0.823414	0.356	0.155	1.29591e-122	7	NOSTRIN
DUSP11	2.43378e-124	0.762634	0.638	0.426	6.24509e-120	7	DUSP1
SNHG71	2.75066e-120	0.798284	0.515	0.315	7.0582e-116	7	SNHG7
ZFP362	2.56876e-118	0.845862	0.612	0.404	6.59143e-114	7	ZFP36
IFITM21	5.32627e-108	0.738551	0.587	0.407	1.36672e-103	7	IFITM2
SLC2A31	6.09283e-108	0.903924	0.387	0.198	1.56342e-103	7	SLC2A3
ID31	2.41303e-103	0.859663	0.501	0.303	6.19185e-99	7	ID3
SAT11	1.28492e-100	0.897686	0.659	0.496	3.29711e-96	7	SAT1
JUNB2	3.11708e-97	0.558557	0.762	0.624	7.99842e-93	7	JUNB
RDX1	1.73184e-96	0.811514	0.594	0.452	4.4439e-92	7	RDX
S100A62	2.40818e-95	0.741026	0.577	0.386	6.17939e-91	7	S100A6
CAV21	4.94246e-87	0.662599	0.312	0.147	1.26824e-82	7	CAV2
NFKBIA1	6.32477e-87	0.713635	0.483	0.305	1.62293e-82	7	NFKBIA
ID21	4.53678e-86	0.817549	0.476	0.297	1.16414e-81	7	ID2
AP1S21	2.68082e-85	0.675646	0.307	0.147	6.87898e-81	7	AP1S2
MGST22	2.46631e-83	0.672514	0.427	0.256	6.32854e-79	7	MGST2
SOCS21	2.781e-80	0.671882	0.308	0.152	7.13603e-76	7	SOCS2
PSMB81	6.72395e-80	0.616958	0.263	0.119	1.72537e-75	7	PSMB8
CFLAR1	4.11941e-79	0.792724	0.307	0.158	1.05704e-74	7	CFLAR
FOXP11	5.05226e-77	0.70783	0.317	0.165	1.29641e-72	7	FOXP1
CD591	2.98625e-73	0.671672	0.501	0.357	7.66271e-69	7	CD59
ARGLU11	7.97628e-71	0.652891	0.551	0.421	2.04671e-66	7	ARGLU1
TAGLN21	2.11428e-68	0.634867	0.42	0.265	5.42524e-64	7	TAGLN2
PLK21	2.81414e-68	0.690831	0.258	0.124	7.22108e-64	7	PLK2
SPTBN12	9.31231e-66	0.61242	0.436	0.283	2.38954e-61	7	SPTBN1
MSN1	1.01115e-65	0.619882	0.262	0.129	2.5946e-61	7	MSN
[truncated: 6,150 more rows]

## Sheet: Fig. 1D - Baboon
	p_val	avg_logFC	pct.1	pct.2	p_val_adj	cluster	gene
CD74	0	3.30148	0.794	0.013	0	Endothelial	CD74
RBP7	0	3.00543	0.809	0.006	0	Endothelial	RBP7
EGFL7	0	2.73368	0.879	0.017	0	Endothelial	EGFL7
GNG11	0	2.60498	0.871	0.081	0	Endothelial	GNG11
VWF	0	2.45779	0.747	0.005	0	Endothelial	VWF
APOD	0	2.44581	0.753	0.097	0	Endothelial	APOD
CAV1	0	2.38542	0.747	0.011	0	Endothelial	CAV1
CLDN5	0	2.26091	0.721	0.002	0	Endothelial	CLDN5
SOX18	0	2.22785	0.709	0.003	0	Endothelial	SOX18
SRGN	0	2.18771	0.771	0.016	0	Endothelial	SRGN
CD320	0	2.10428	0.756	0.116	0	Endothelial	CD320
GPIHBP1	0	2.04663	0.641	0.021	0	Endothelial	GPIHBP1
TM4SF1	0	1.96506	0.682	0.006	0	Endothelial	TM4SF1
TAGLN2	0	1.95493	0.762	0.08	0	Endothelial	TAGLN2
RAMP2	0	1.94235	0.765	0.062	0	Endothelial	RAMP2
TNFSF10	0	1.80455	0.656	0.01	0	Endothelial	TNFSF10
LOC101021633	0	1.74669	0.782	0.124	0	Endothelial	LOC101021633
LOC101018551	0	1.72904	0.574	0.02	0	Endothelial	LOC101018551
LOC116268485	0	1.65097	0.497	0.007	0	Endothelial	LOC116268485
CALCRL	0	1.64768	0.597	0.021	0	Endothelial	CALCRL
ECSCR	0	1.6171	0.653	0.002	0	Endothelial	ECSCR
PODXL	0	1.61644	0.582	0.002	0	Endothelial	PODXL
EMCN	0	1.61483	0.632	0.001	0	Endothelial	EMCN
ADGRL4	0	1.61465	0.609	0.001	0	Endothelial	ADGRL4
TMEM88	0	1.61157	0.597	0.017	0	Endothelial	TMEM88
RAMP3	0	1.60918	0.571	0.006	0	Endothelial	RAMP3
AQP1	0	1.58268	0.509	0.003	0	Endothelial	AQP1
CLEC14A	0	1.58154	0.588	0.008	0	Endothelial	CLEC14A
LIFR	0	1.58029	0.606	0.068	0	Endothelial	LIFR
LOC103883612	0	1.55137	0.526	0.006	0	Endothelial	LOC103883612
ESAM	0	1.54985	0.612	0.003	0	Endothelial	ESAM
PSMB9	0	1.53782	0.641	0.045	0	Endothelial	PSMB9
NFIB	0	1.53157	0.621	0.047	0	Endothelial	NFIB
SOX17	0	1.52448	0.5	0.005	0	Endothelial	SOX17
C1H1orf115	0	1.52266	0.65	0.057	0	Endothelial	C1H1orf115
EFNA1	0	1.4987	0.591	0.024	0	Endothelial	EFNA1
RGCC	0	1.4663	0.409	0.01	0	Endothelial	RGCC
ETS1	0	1.46474	0.559	0.048	0	Endothelial	ETS1
EPAS1	0	1.4248	0.571	0.043	0	Endothelial	EPAS1
MYCT1	0	1.37152	0.541	0.002	0	Endothelial	MYCT1
LOC101021493	0	1.3545	0.526	0.034	0	Endothelial	LOC101021493
PSMB8	0	1.35304	0.6	0.04	0	Endothelial	PSMB8
CD93	0	1.32143	0.497	0.001	0	Endothelial	CD93
PTP4A3	0	1.30196	0.506	0.02	0	Endothelial	PTP4A3
TGFBR2	0	1.29955	0.524	0.016	0	Endothelial	TGFBR2
APLNR	0	1.27704	0.432	0.001	0	Endothelial	APLNR
ARHGAP29	0	1.27689	0.556	0.036	0	Endothelial	ARHGAP29
LPAR6	0	1.26464	0.515	0.02	0	Endothelial	LPAR6
SLCO2B1	0	1.2646	0.5	0.008	0	Endothelial	SLCO2B1
ABCB1	0	1.26372	0.462	0.004	0	Endothelial	ABCB1
PECAM1	0	1.25979	0.421	0.002	0	Endothelial	PECAM1
ETS2	0	1.25502	0.479	0.012	0	Endothelial	ETS2
CAV2	0	1.25385	0.571	0.025	0	Endothelial	CAV2
DEPP1	0	1.2236	0.362	0.003	0	Endothelial	DEPP1
ELK3	0	1.21932	0.509	0.018	0	Endothelial	ELK3
S100A16	0	1.20137	0.544	0.04	0	Endothelial	S100A16
GIMAP4	0	1.17816	0.453	0.003	0	Endothelial	GIMAP4
PDGFB	0	1.16738	0.465	0.019	0	Endothelial	PDGFB
KANK3	0	1.16276	0.485	0.002	0	Endothelial	KANK3
LMO2	0	1.16104	0.462	0.007	0	Endothelial	LMO2
LOC103880102	0	1.16002	0.459	0.001	0	Endothelial	LOC103880102
CYYR1	0	1.14103	0.471	0.001	0	Endothelial	CYYR1
TIE1	0	1.1337	0.474	0.001	0	Endothelial	TIE1
ADAM15	0	1.12667	0.476	0.028	0	Endothelial	ADAM15
TRIM22	0	1.12629	0.538	0.027	0	Endothelial	TRIM22
EMP1	0	1.12123	0.409	0.002	0	Endothelial	EMP1
DOCK9	0	1.09614	0.453	0.035	0	Endothelial	DOCK9
PTPRB	0	1.08338	0.435	0.001	0	Endothelial	PTPRB
CD36	0	1.08226	0.415	0.026	0	Endothelial	CD36
FAM167B	0	1.07453	0.362	0.001	0	Endothelial	FAM167B
CDH5	0	1.06791	0.438	0	0	Endothelial	CDH5
JAG1	0	1.03226	0.406	0.028	0	Endothelial	JAG1
ADGRF5	0	1.01914	0.385	0.002	0	Endothelial	ADGRF5
KDR	0	1.01361	0.326	0.001	0	Endothelial	KDR
NIBAN1	0	1.01059	0.403	0.01	0	Endothelial	NIBAN1
CRIP2	0	0.98952	0.429	0.032	0	Endothelial	CRIP2
SMAD1	0	0.98568	0.432	0.019	0	Endothelial	SMAD1
LOC116275312	0	0.970813	0.418	0.007	0	Endothelial	LOC116275312
GIMAP1	0	0.96344	0.394	0.003	0	Endothelial	GIMAP1
LOC101020671	0	0.943171	0.412	0.012	0	Endothelial	LOC101020671
ITGA1	0	0.895548	0.385	0.026	0	Endothelial	ITGA1
LOC116273246	0	0.891438	0.344	0.009	0	Endothelial	LOC116273246
GMFG	0	0.888967	0.341	0.008	0	Endothelial	GMFG
PLXND1	0	0.883158	0.382	0.019	0	Endothelial	PLXND1
FAM110D	0	0.877363	0.332	0.008	0	Endothelial	FAM110D
CCM2L	0	0.873657	0.368	0.002	0	Endothelial	CCM2L
C9H12orf75	0	0.840118	0.335	0.019	0	Endothelial	C9H12orf75
MMRN2	0	0.832464	0.332	0.001	0	Endothelial	MMRN2
DYSF	0	0.830769	0.3	0.004	0	Endothelial	DYSF
LOC101026217	0	0.824037	0.391	0.023	0	Endothelial	LOC101026217
RASSF3	0	0.814804	0.329	0.006	0	Endothelial	RASSF3
CX3CL1	0	0.812539	0.282	0.009	0	Endothelial	CX3CL1
FLT1	0	0.80423	0.368	0.003	0	Endothelial	FLT1
ST3GAL1	0	0.789344	0.335	0.009	0	Endothelial	ST3GAL1
PLCB1	0	0.785712	0.288	0.007	0	Endothelial	PLCB1
PRKCH	0	0.785143	0.347	0.003	0	Endothelial	PRKCH
ABCG2	0	0.782674	0.315	0.006	0	Endothelial	ABCG2
GRB10	0	0.781729	0.335	0.005	0	Endothelial	GRB10
LOC110742924	0	0.776862	0.321	0.002	0	Endothelial	LOC110742924
ROBO4	0	0.769077	0.321	0.001	0	Endothelial	ROBO4
LOC110744090	0	0.75714	0.294	0	0	Endothelial	LOC110744090
THY1	0	0.748738	0.288	0.011	0	Endothelial	THY1
C1QTNF5	0	0.744576	0.353	0.009	0	Endothelial	C1QTNF5
SNCG	0	0.7431	0.326	0.016	0	Endothelial	SNCG
GIMAP6	0	0.728658	0.321	0.002	0	Endothelial	GIMAP6
EFNB2	0	0.727247	0.312	0.007	0	Endothelial	EFNB2
FAM89A	0	0.724051	0.312	0.008	0	Endothelial	FAM89A
ERG	0	0.710076	0.309	0.001	0	Endothelial	ERG
FLI1	0	0.698147	0.3	0.001	0	Endothelial	FLI1
MCF2L	0	0.693529	0.271	0.004	0	Endothelial	MCF2L
PTPRM	0	0.692621	0.329	0.011	0	Endothelial	PTPRM
NMB	0	0.681755	0.309	0.006	0	Endothelial	NMB
GBP1	0	0.678233	0.276	0.008	0	Endothelial	GBP1
GRASP	0	0.676382	0.315	0.012	0	Endothelial	GRASP
CDA	0	0.672398	0.282	0.002	0	Endothelial	CDA
AFAP1L1	0	0.669112	0.288	0.001	0	Endothelial	AFAP1L1
LOC101016024	0	0.666227	0.268	0.002	0	Endothelial	LOC101016024
MECOM	0	0.663788	0.274	0.001	0	Endothelial	MECOM
CASP10	0	0.662405	0.256	0.002	0	Endothelial	CASP10
RPS6KA2	0	0.657821	0.294	0.005	0	Endothelial	RPS6KA2
LOC101001046	0	0.652072	0.321	0.016	0	Endothelial	LOC101001046
MFNG	0	0.648112	0.3	0.003	0	Endothelial	MFNG
SASH1	0	0.639723	0.312	0.007	0	Endothelial	SASH1
TEK	0	0.637417	0.312	0.001	0	Endothelial	TEK
GGT5	0	0.630092	0.259	0.011	0	Endothelial	GGT5
SHROOM4	0	0.626327	0.259	0.01	0	Endothelial	SHROOM4
SMTN	0	0.614953	0.274	0.01	0	Endothelial	SMTN
AHR	0	0.594504	0.256	0.007	0	Endothelial	AHR
LRRC8C	0	0.587049	0.268	0.011	0	Endothelial	LRRC8C
MYOF	0	0.5516	0.265	0.006	0	Endothelial	MYOF
LIMS2	0	0.550105	0.282	0.011	0	Endothelial	LIMS2
CTTNBP2	0	0.545873	0.265	0.005	0	Endothelial	CTTNBP2
MSN	3.72711e-299	0.952411	0.415	0.032	8.13516e-295	Endothelial	MSN
IGFBP7	2.43977e-298	2.35151	0.926	0.22	5.32529e-294	Endothelial	IGFBP7
ID3	1.30099e-289	2.24525	0.7	0.11	2.83967e-285	Endothelial	ID3
LOC116273051	1.11955e-286	1.62393	0.791	0.143	2.44364e-282	Endothelial	LOC116273051
NES	7.7392e-286	0.710008	0.253	0.012	1.68924e-281	Endothelial	NES
LOC101011798	3.6203e-281	0.639148	0.259	0.012	7.90202e-277	Endothelial	LOC101011798
CLIC2	9.71565e-277	0.750567	0.371	0.027	2.12063e-272	Endothelial	CLIC2
LOC103876647	1.70077e-272	1.0072	0.479	0.048	3.71226e-268	Endothelial	LOC103876647
LOC116272783	1.32104e-271	2.5726	0.944	0.3	2.88344e-267	Endothelial	LOC116272783
HSPG2	1.80542e-271	1.70808	0.694	0.112	3.94068e-267	Endothelial	HSPG2
APOL4	1.40987e-269	1.05109	0.503	0.051	3.07733e-265	Endothelial	APOL4
CLIC4	1.44823e-268	0.950344	0.438	0.04	3.16104e-264	Endothelial	CLIC4
VPS35L	2.01464e-267	1.18802	0.521	0.059	4.39736e-263	Endothelial	VPS35L
CHRNA7	2.4973e-267	0.584371	0.265	0.014	5.45087e-263	Endothelial	CHRNA7
MYO1B	2.74732e-260	0.651942	0.259	0.014	5.99658e-256	Endothelial	MYO1B
PXDN	7.32184e-259	0.662677	0.274	0.015	1.59814e-254	Endothelial	PXDN
LOC101000083	2.36455e-256	1.85875	0.862	0.199	5.16111e-252	Endothelial	LOC101000083
SP100	1.69192e-245	0.555516	0.274	0.016	3.69296e-241	Endothelial	SP100
TMSB4X	1.82934e-243	2.89795	0.985	0.432	3.99289e-239	Endothelial	TMSB4X
EMP2	1.27775e-235	0.737913	0.409	0.039	2.78894e-231	Endothelial	EMP2
ID1	1.09409e-232	2.0066	0.6	0.096	2.38807e-228	Endothelial	ID1
LOC101009503	2.28398e-230	1.90422	0.8	0.201	4.98524e-226	Endothelial	LOC101009503
AHNAK	1.54644e-226	1.10771	0.6	0.085	3.37542e-222	Endothelial	AHNAK
LDB2	5.9253e-223	0.665091	0.315	0.024	1.29331e-218	Endothelial	LDB2
CAVIN2	4.27518e-217	1.16948	0.556	0.076	9.33143e-213	Endothelial	CAVIN2
LOC116273535	1.18264e-215	0.65625	0.271	0.019	2.58134e-211	Endothelial	LOC116273535
GAL	2.87397e-214	0.687326	0.324	0.027	6.27302e-210	Endothelial	GAL
LOC101014185	3.01464e-212	1.91941	0.879	0.301	6.58006e-208	Endothelial	LOC101014185
TNS2	9.33366e-211	0.736269	0.397	0.041	2.03726e-206	Endothelial	TNS2
STOM	1.15548e-206	0.895154	0.444	0.053	2.52208e-202	Endothelial	STOM
GPR146	3.80453e-205	0.71177	0.303	0.025	8.30415e-201	Endothelial	GPR146
FXYD5	2.15156e-201	0.983334	0.506	0.072	4.69621e-197	Endothelial	FXYD5
ENG	1.16311e-195	1.30782	0.656	0.128	2.53873e-191	Endothelial	ENG
ABCC4	4.70817e-193	0.695873	0.303	0.026	1.02765e-188	Endothelial	ABCC4
LOC101002482	1.74845e-189	1.01741	0.444	0.057	3.81635e-185	Endothelial	LOC101002482
SOCS2	1.38793e-184	0.648767	0.332	0.032	3.02943e-180	Endothelial	SOCS2
CSGALNACT1	1.36776e-182	0.704151	0.347	0.036	2.98541e-178	Endothelial	CSGALNACT1
LOC101015560	4.34043e-179	1.97586	0.941	0.592	9.47386e-175	Endothelial	LOC101015560
LOC116272574	3.42582e-173	0.447954	0.259	0.021	7.47754e-169	Endothelial	LOC116272574
LOC116275302	1.63228e-172	0.760303	0.344	0.038	3.56277e-168	Endothelial	LOC116275302
CPNE2	7.53912e-172	0.534731	0.276	0.024	1.64556e-167	Endothelial	CPNE2
HOMER2	4.40893e-171	0.508558	0.271	0.024	9.62337e-167	Endothelial	HOMER2
LOC101025279	1.21218e-165	0.651538	0.326	0.035	2.64582e-161	Endothelial	LOC101025279
CAVIN3	2.70155e-165	0.703783	0.412	0.054	5.89667e-161	Endothelial	CAVIN3
SHC1	3.30223e-162	0.96925	0.512	0.087	7.20777e-158	Endothelial	SHC1
CFH	1.87273e-160	0.839367	0.409	0.057	4.08761e-156	Endothelial	CFH
VIM	1.89335e-159	1.55334	0.982	0.759	4.13261e-155	Endothelial	VIM
TMEM204	1.68386e-154	0.608768	0.265	0.025	3.67536e-150	Endothelial	TMEM204
CTHRC1	1.73478e-154	1.14691	0.497	0.089	3.7865e-150	Endothelial	CTHRC1
IER2	2.02116e-154	1.15794	0.712	0.174	4.41159e-150	Endothelial	IER2
NPDC1	2.28451e-153	1.23119	0.697	0.183	4.98639e-149	Endothelial	NPDC1
SLC9A3R2	4.0336e-153	1.63592	0.682	0.188	8.80413e-149	Endothelial	SLC9A3R2
ZEB1	3.24129e-152	0.605573	0.353	0.043	7.07476e-148	Endothelial	ZEB1
CARD16	5.0488e-149	0.550243	0.271	0.026	1.102e-144	Endothelial	CARD16
RRAS	3.1565e-147	0.713	0.341	0.042	6.88968e-143	Endothelial	RRAS
LGALS3	1.65253e-145	0.539011	0.309	0.035	3.60697e-141	Endothelial	LGALS3
IFI16	1.84635e-144	1.31865	0.709	0.2	4.03002e-140	Endothelial	IFI16
B2M	1.30472e-143	1.88613	0.929	0.585	2.84781e-139	Endothelial	B2M
SOCS3	5.18758e-140	0.940241	0.468	0.079	1.13229e-135	Endothelial	SOCS3
GASK1B	9.21407e-139	0.856941	0.432	0.068	2.01115e-134	Endothelial	GASK1B
FZD4	2.52676e-136	0.701504	0.365	0.052	5.51515e-132	Endothelial	FZD4
TCIM	5.49829e-135	0.585356	0.35	0.046	1.20011e-130	Endothelial	TCIM
S100A10	5.50982e-135	1.45318	0.879	0.474	1.20263e-130	Endothelial	S100A10
TGM2	5.66723e-135	0.820567	0.388	0.061	1.23699e-130	Endothelial	TGM2
HOXD9	2.15828e-134	0.543491	0.344	0.045	4.71087e-130	Endothelial	HOXD9
MRTFB	6.60303e-132	0.806165	0.394	0.063	1.44124e-127	Endothelial	MRTFB
TMSB10	2.00214e-130	1.27952	0.979	0.754	4.37007e-126	Endothelial	TMSB10
ASAP1	7.69231e-127	0.613411	0.315	0.041	1.679e-122	Endothelial	ASAP1
UCP2	2.16956e-126	0.581761	0.262	0.029	4.7355e-122	Endothelial	UCP2
IGFBP4	5.05018e-126	0.984829	0.771	0.223	1.1023e-121	Endothelial	IGFBP4
PLK2	1.62609e-125	0.567343	0.279	0.033	3.54926e-121	Endothelial	PLK2
SH3BGRL3	4.59059e-124	0.983897	0.591	0.148	1.00199e-119	Endothelial	SH3BGRL3
LOC116272953	1.18514e-123	1.63064	0.821	0.37	2.5868e-119	Endothelial	LOC116272953
ITM2A	1.57238e-122	0.810694	0.474	0.088	3.43202e-118	Endothelial	ITM2A
PPP3CA	2.79164e-120	0.773895	0.468	0.092	6.0933e-116	Endothelial	PPP3CA
IRF1	1.91332e-118	0.722206	0.318	0.045	4.17621e-114	Endothelial	IRF1
SPARCL1	1.03306e-117	1.45272	0.829	0.428	2.25487e-113	Endothelial	SPARCL1
TAP1	1.04668e-117	0.606945	0.306	0.042	2.28459e-113	Endothelial	TAP1
LOC100997583	3.55195e-117	1.14741	0.385	0.071	7.75284e-113	Endothelial	LOC100997583
DHRS3	8.08462e-117	0.674856	0.326	0.047	1.76463e-112	Endothelial	DHRS3
PALM2AKAP2	1.74774e-116	0.820642	0.438	0.086	3.81478e-112	Endothelial	PALM2AKAP2
VSIR	2.53523e-116	0.773186	0.388	0.067	5.53365e-112	Endothelial	VSIR
HSPB1	3.04672e-113	1.11219	0.65	0.187	6.65007e-109	Endothelial	HSPB1
BTG1	1.08289e-112	1.21461	0.888	0.527	2.36362e-108	Endothelial	BTG1
MAPK3	1.51771e-112	0.478376	0.276	0.036	3.3127e-108	Endothelial	MAPK3
CRIP1	1.84882e-112	0.966365	0.421	0.082	4.03541e-108	Endothelial	CRIP1
S100A6	3.00305e-112	1.06838	0.479	0.099	6.55475e-108	Endothelial	S100A6
PPP2R5A	3.74793e-111	0.821926	0.453	0.094	8.18061e-107	Endothelial	PPP2R5A
EHD4	5.03603e-111	0.912208	0.403	0.078	1.09921e-106	Endothelial	EHD4
LRRFIP1	1.82535e-110	0.782885	0.406	0.078	3.98419e-106	Endothelial	LRRFIP1
BACE2	7.58916e-110	0.705955	0.406	0.076	1.65649e-105	Endothelial	BACE2
LOC101016766	3.33576e-108	0.668079	0.294	0.043	7.28096e-104	Endothelial	LOC101016766
MEF2C	7.82118e-106	1.24026	0.662	0.222	1.70713e-101	Endothelial	MEF2C
LUZP1	7.83773e-105	0.606981	0.362	0.064	1.71074e-100	Endothelial	LUZP1
NUAK1	9.36793e-104	0.782001	0.382	0.074	2.04474e-99	Endothelial	NUAK1
KITLG	1.16244e-101	0.545599	0.274	0.039	2.53726e-97	Endothelial	KITLG
LOC101026647	9.03755e-98	1.15263	0.85	0.492	1.97263e-93	Endothelial	LOC101026647
ARHGDIB	9.10175e-98	0.431603	0.253	0.033	1.98664e-93	Endothelial	ARHGDIB
LY6E	1.09817e-96	1.03353	0.679	0.24	2.39699e-92	Endothelial	LY6E
FOSL2	1.12043e-96	0.50934	0.259	0.036	2.44556e-92	Endothelial	FOSL2
COL15A1	1.50452e-95	0.713815	0.521	0.122	3.28392e-91	Endothelial	COL15A1
DUSP6	7.90985e-95	0.670872	0.318	0.055	1.72648e-90	Endothelial	DUSP6
KLF4	8.76468e-92	0.818076	0.426	0.096	1.91307e-87	Endothelial	KLF4
TM4SF18	3.48595e-91	1.02503	0.612	0.206	7.60879e-87	Endothelial	TM4SF18
CCDC85B	6.79525e-87	1.07606	0.732	0.325	1.4832e-82	Endothelial	CCDC85B
IQGAP1	2.50989e-86	0.836361	0.524	0.151	5.47834e-82	Endothelial	IQGAP1
VAMP5	3.03663e-86	0.897562	0.529	0.158	6.62806e-82	Endothelial	VAMP5
SNRK	3.92831e-86	0.556621	0.329	0.063	8.57431e-82	Endothelial	SNRK
OAS3	2.08863e-84	0.498124	0.294	0.052	4.55885e-80	Endothelial	OAS3
NAA38	2.60633e-84	0.981745	0.691	0.281	5.68883e-80	Endothelial	NAA38
LOC101022333	3.44187e-84	1.13636	0.418	0.107	7.51256e-80	Endothelial	LOC101022333
LOC101001352	2.77635e-82	0.521646	0.329	0.064	6.05994e-78	Endothelial	LOC101001352
PAM	2.7969e-82	0.449676	0.291	0.05	6.10479e-78	Endothelial	PAM
PLS3	9.01466e-82	0.579951	0.303	0.056	1.96763e-77	Endothelial	PLS3
ZFP36	1.02898e-81	1.35932	0.562	0.192	2.24596e-77	Endothelial	ZFP36
ZBTB16	5.59129e-81	0.462779	0.35	0.069	1.22041e-76	Endothelial	ZBTB16
PML	1.31631e-79	0.508369	0.318	0.062	2.87312e-75	Endothelial	PML
HOXD4	7.88081e-79	0.360598	0.279	0.047	1.72014e-74	Endothelial	HOXD4
RPS28	1.60684e-78	0.489628	1	0.984	3.50725e-74	Endothelial	RPS28
LOC101012036	1.22574e-77	0.642184	0.4	0.096	2.67543e-73	Endothelial	LOC101012036
ARL15	1.61991e-77	0.83881	0.562	0.179	3.53578e-73	Endothelial	ARL15
NET1	5.10275e-77	0.730393	0.362	0.082	1.11378e-72	Endothelial	NET1
RBMS3	5.89389e-77	0.449532	0.359	0.074	1.28646e-72	Endothelial	RBMS3
CTBP2	9.12408e-75	0.715288	0.438	0.118	1.99151e-70	Endothelial	CTBP2
GYPC	1.37491e-73	0.634982	0.406	0.102	3.00102e-69	Endothelial	GYPC
CD151	1.41054e-73	0.799461	0.556	0.183	3.07879e-69	Endothelial	CD151
IFIT1	9.47645e-73	0.907087	0.441	0.125	2.06842e-68	Endothelial	IFIT1
GSN	7.69603e-72	0.793195	0.412	0.104	1.67981e-67	Endothelial	GSN
CCN2	1.35005e-71	0.644138	0.326	0.071	2.94675e-67	Endothelial	CCN2
SYNE1	7.84731e-71	0.929732	0.379	0.098	1.71283e-66	Endothelial	SYNE1
CLEC3B	2.0694e-70	0.379366	0.374	0.084	4.51688e-66	Endothelial	CLEC3B
BST2	6.40577e-70	0.583581	0.415	0.106	1.39819e-65	Endothelial	BST2
CASKIN2	1.43544e-69	0.595738	0.35	0.083	3.13313e-65	Endothelial	CASKIN2
TCF4	4.51578e-69	0.944842	0.709	0.344	9.85659e-65	Endothelial	TCF4
SEC14L1	6.96778e-67	0.835681	0.538	0.191	1.52086e-62	Endothelial	SEC14L1
S100A13	8.24601e-66	0.600714	0.429	0.119	1.79986e-61	Endothelial	S100A13
LOC101021715	2.07068e-65	0.635098	0.376	0.099	4.51968e-61	Endothelial	LOC101021715
SAT1	3.67038e-65	1.2198	0.8	0.503	8.01133e-61	Endothelial	SAT1
TPD52L1	1.65901e-64	0.519735	0.362	0.089	3.62113e-60	Endothelial	TPD52L1
F11R	2.38685e-64	0.553698	0.335	0.08	5.20978e-60	Endothelial	F11R
LOC101018895	2.506e-64	1.12899	0.535	0.201	5.46985e-60	Endothelial	LOC101018895
LAMA5	4.73659e-63	0.549607	0.279	0.059	1.03386e-58	Endothelial	LAMA5
S100A11	1.43946e-62	0.827462	0.732	0.371	3.14191e-58	Endothelial	S100A11
KIAA0355	2.38419e-62	0.813754	0.509	0.178	5.20397e-58	Endothelial	KIAA0355
IGFBP6	2.41039e-62	0.744479	0.391	0.102	5.26116e-58	Endothelial	IGFBP6
RBPMS	2.77384e-62	0.366538	0.297	0.062	6.05447e-58	Endothelial	RBPMS
MCAM	2.08937e-61	0.629997	0.326	0.079	4.56046e-57	Endothelial	MCAM
SORBS3	2.75867e-61	0.411264	0.297	0.066	6.02134e-57	Endothelial	SORBS3
CPNE8	7.85847e-61	0.438539	0.259	0.052	1.71527e-56	Endothelial	CPNE8
ARHGAP18	2.06427e-60	0.520426	0.318	0.077	4.50568e-56	Endothelial	ARHGAP18
EBF1	2.68245e-60	0.332723	0.412	0.106	5.85498e-56	Endothelial	EBF1
IFIT3	1.43401e-59	0.831736	0.538	0.202	3.13002e-55	Endothelial	IFIT3
MAP3K11	5.49816e-58	0.528184	0.397	0.116	1.20008e-53	Endothelial	MAP3K11
CD2AP	3.14173e-57	0.476233	0.335	0.087	6.85745e-53	Endothelial	CD2AP
ZFP36L1	3.58383e-57	0.91476	0.771	0.481	7.82242e-53	Endothelial	ZFP36L1
ZFP36L2	4.01848e-57	0.852391	0.541	0.214	8.77113e-53	Endothelial	ZFP36L2
WWTR1	5.75774e-57	0.667826	0.441	0.142	1.25674e-52	Endothelial	WWTR1
ORAI1	5.95653e-57	0.589099	0.341	0.091	1.30013e-52	Endothelial	ORAI1
FAM13C	8.2874e-57	0.580296	0.326	0.083	1.80889e-52	Endothelial	FAM13C
NOSTRIN	1.4916e-55	0.745366	0.526	0.201	3.25571e-51	Endothelial	NOSTRIN
MAML2	1.74154e-54	0.440275	0.3	0.074	3.80126e-50	Endothelial	MAML2
SERPING1	2.75407e-54	0.586406	0.465	0.151	6.01131e-50	Endothelial	SERPING1
DUSP23	3.32942e-54	0.728	0.432	0.145	7.26713e-50	Endothelial	DUSP23
IRF7	3.94521e-54	0.568129	0.265	0.061	8.61122e-50	Endothelial	IRF7
LOC101023645	4.04965e-54	0.582493	0.476	0.159	8.83918e-50	Endothelial	LOC101023645
DIPK1B	1.08416e-53	0.474322	0.262	0.059	2.3664e-49	Endothelial	DIPK1B
CDC42EP5	1.16488e-52	0.463984	0.294	0.073	2.54259e-48	Endothelial	CDC42EP5
UTRN	2.39388e-51	0.786393	0.453	0.162	5.22511e-47	Endothelial	UTRN
MIPEP	6.54173e-51	0.432215	0.303	0.078	1.42786e-46	Endothelial	MIPEP
RASAL2	1.0092e-50	0.561839	0.388	0.121	2.20277e-46	Endothelial	RASAL2
MOB2	1.86005e-50	0.61605	0.468	0.167	4.05992e-46	Endothelial	MOB2
STAT3	2.759e-50	0.4356	0.329	0.089	6.02206e-46	Endothelial	STAT3
PITPNA	3.67001e-48	0.410534	0.271	0.068	8.01052e-44	Endothelial	PITPNA
LOC116273462	3.85966e-48	0.532039	0.376	0.117	8.42449e-44	Endothelial	LOC116273462
TSPAN14	1.24852e-47	0.474395	0.285	0.075	2.72515e-43	Endothelial	TSPAN14
TSPAN4	1.68866e-47	0.652061	0.529	0.217	3.68583e-43	Endothelial	TSPAN4
LPCAT2	4.19462e-47	0.597991	0.347	0.107	9.1556e-43	Endothelial	LPCAT2
SPTLC2	2.34557e-46	0.478082	0.326	0.096	5.11967e-42	Endothelial	SPTLC2
CAPN2	4.35157e-46	0.472439	0.306	0.085	9.49818e-42	Endothelial	CAPN2
MDK	4.76482e-46	0.466949	0.338	0.097	1.04002e-41	Endothelial	MDK
YBX3	5.31244e-46	0.655978	0.524	0.215	1.15955e-41	Endothelial	YBX3
KLF2	1.46493e-45	0.689875	0.738	0.435	3.19749e-41	Endothelial	KLF2
GADD45B	1.81102e-45	0.810564	0.529	0.224	3.95292e-41	Endothelial	GADD45B
COL4A1	1.81619e-45	0.760188	0.421	0.153	3.96421e-41	Endothelial	COL4A1
AOPEP	5.81971e-45	0.635494	0.4	0.142	1.27027e-40	Endothelial	AOPEP
LOC116273624	4.71648e-44	0.843215	0.847	0.524	1.02947e-39	Endothelial	LOC116273624
MAP1LC3A	1.22556e-43	0.545662	0.406	0.141	2.67502e-39	Endothelial	MAP1LC3A
SVIP	1.87284e-43	0.551876	0.35	0.112	4.08786e-39	Endothelial	SVIP
LOC101014638	4.22936e-43	0.383268	0.253	0.064	9.23142e-39	Endothelial	LOC101014638
LOC101001096	4.52165e-43	0.726449	0.409	0.138	9.86942e-39	Endothelial	LOC101001096
HELZ2	1.27532e-42	0.441265	0.271	0.073	2.78365e-38	Endothelial	HELZ2
GUK1	4.48859e-42	0.616082	0.497	0.206	9.79724e-38	Endothelial	GUK1
TNFRSF1A	7.07605e-42	0.344903	0.268	0.071	1.54449e-37	Endothelial	TNFRSF1A
PIM3	1.33415e-41	0.454598	0.262	0.07	2.91205e-37	Endothelial	PIM3
YES1	2.03881e-41	0.47142	0.315	0.096	4.45011e-37	Endothelial	YES1
TGFBR3	5.1099e-41	0.392149	0.406	0.135	1.11534e-36	Endothelial	TGFBR3
IFNGR1	6.75169e-41	0.585019	0.368	0.126	1.47369e-36	Endothelial	IFNGR1
LOC101024360	8.52448e-41	0.434221	0.341	0.111	1.86064e-36	Endothelial	LOC101024360
MAST4	2.97758e-40	0.403989	0.276	0.079	6.49917e-36	Endothelial	MAST4
BCAM	5.40241e-40	0.644319	0.782	0.504	1.17918e-35	Endothelial	BCAM
IFNAR1	1.17626e-39	0.534804	0.421	0.157	2.56742e-35	Endothelial	IFNAR1
PCBD1	2.1643e-39	0.389619	0.344	0.111	4.72402e-35	Endothelial	PCBD1
SETX	2.23016e-39	0.571925	0.382	0.137	4.86777e-35	Endothelial	SETX
LOC100999492	2.64717e-39	0.399535	0.297	0.089	5.77799e-35	Endothelial	LOC100999492
EHD1	3.23839e-39	0.474849	0.259	0.072	7.06844e-35	Endothelial	EHD1
SEC11C	7.06698e-39	0.488677	0.309	0.096	1.54251e-34	Endothelial	SEC11C
SYPL1	1.1035e-38	0.593752	0.547	0.252	2.4086e-34	Endothelial	SYPL1
SPATS2L	1.57134e-38	0.36751	0.321	0.101	3.42977e-34	Endothelial	SPATS2L
CTNNBIP1	4.48543e-38	0.470809	0.268	0.078	9.79034e-34	Endothelial	CTNNBIP1
FKBP9	7.58458e-38	0.417042	0.329	0.107	1.65549e-33	Endothelial	FKBP9
DAB2	1.06221e-37	0.501683	0.441	0.173	2.31849e-33	Endothelial	DAB2
SLC52A2	1.83447e-37	0.433731	0.294	0.091	4.00409e-33	Endothelial	SLC52A2
LOC101006785	2.31402e-37	0.709798	0.771	0.537	5.05081e-33	Endothelial	LOC101006785
PEA15	8.39264e-37	0.322528	0.294	0.09	1.83186e-32	Endothelial	PEA15
NRP2	3.26218e-36	0.542572	0.271	0.083	7.12036e-32	Endothelial	NRP2
EGLN1	3.54764e-36	0.563706	0.447	0.187	7.74344e-32	Endothelial	EGLN1
UACA	5.80527e-36	0.532357	0.371	0.137	1.26712e-31	Endothelial	UACA
EPSTI1	1.48551e-35	0.444855	0.329	0.111	3.24243e-31	Endothelial	EPSTI1
RHOB	1.77242e-35	0.625328	0.694	0.419	3.86865e-31	Endothelial	RHOB
IFI44	1.84343e-35	0.465286	0.306	0.101	4.02366e-31	Endothelial	IFI44
ZNF706	2.47234e-35	0.544346	0.576	0.276	5.39639e-31	Endothelial	ZNF706
IFIT2	3.63631e-35	0.469258	0.306	0.1	7.93697e-31	Endothelial	IFIT2
NUDT3	6.25867e-35	0.431279	0.418	0.165	1.36608e-30	Endothelial	NUDT3
CALCOCO2	6.42323e-35	0.455564	0.415	0.162	1.402e-30	Endothelial	CALCOCO2
GNAI2	7.23658e-35	0.584376	0.553	0.274	1.57953e-30	Endothelial	GNAI2
CPD	1.32371e-34	0.412256	0.318	0.108	2.88927e-30	Endothelial	CPD
CAVIN1	1.7669e-34	0.620921	0.585	0.31	3.8566e-30	Endothelial	CAVIN1
RGS3	2.28981e-34	0.487013	0.441	0.181	4.99796e-30	Endothelial	RGS3
DBI	3.99849e-34	0.47997	0.403	0.158	8.7275e-30	Endothelial	DBI
HYAL2	1.22097e-33	0.55363	0.385	0.152	2.66502e-29	Endothelial	HYAL2
SLC30A1	2.25974e-33	0.346644	0.262	0.081	4.93233e-29	Endothelial	SLC30A1
LOC100999318	2.85689e-33	0.597912	0.706	0.433	6.23574e-29	Endothelial	LOC100999318
NCK1	4.79405e-33	0.473223	0.379	0.148	1.0464e-28	Endothelial	NCK1
PALMD	1.47736e-32	0.503278	0.374	0.147	3.22463e-28	Endothelial	PALMD
CPEB4	5.97423e-32	0.332779	0.294	0.099	1.30399e-27	Endothelial	CPEB4
KLF9	6.46383e-32	0.324588	0.285	0.094	1.41086e-27	Endothelial	KLF9
CEBPD	9.98672e-32	0.348511	0.385	0.145	2.1798e-27	Endothelial	CEBPD
MRRF	1.48747e-31	0.347086	0.294	0.099	3.24669e-27	Endothelial	MRRF
ATL2	3.15228e-31	0.335579	0.282	0.094	6.88049e-27	Endothelial	ATL2
TTC28	1.3718e-30	0.313634	0.332	0.12	2.99422e-26	Endothelial	TTC28
TJP1	1.61e-30	0.701752	0.615	0.373	3.51416e-26	Endothelial	TJP1
GNAQ	2.91826e-30	0.406546	0.365	0.145	6.36969e-26	Endothelial	GNAQ
FAM171A1	3.29231e-30	0.385689	0.315	0.114	7.18612e-26	Endothelial	FAM171A1
PLEKHO1	4.21582e-30	0.400393	0.279	0.095	9.20187e-26	Endothelial	PLEKHO1
MXD4	4.35931e-30	0.349795	0.303	0.108	9.51507e-26	Endothelial	MXD4
SERPINH1	6.96167e-30	0.335956	0.438	0.183	1.51952e-25	Endothelial	SERPINH1
CARD10	1.4256e-29	0.360916	0.253	0.082	3.11166e-25	Endothelial	CARD10
EVA1B	1.90866e-29	0.472482	0.506	0.24	4.16603e-25	Endothelial	EVA1B
SPTBN1	2.21129e-29	0.539979	0.665	0.39	4.82659e-25	Endothelial	SPTBN1
PTMA	2.22568e-29	0.392175	0.926	0.903	4.858e-25	Endothelial	PTMA
OAZ2	2.23199e-29	0.521294	0.488	0.232	4.87176e-25	Endothelial	OAZ2
SH3GLB1	2.72752e-29	0.430716	0.435	0.189	5.95335e-25	Endothelial	SH3GLB1
SUB1	5.82646e-29	0.514472	0.718	0.468	1.27174e-24	Endothelial	SUB1
JAM2	6.96959e-29	0.548663	0.485	0.24	1.52125e-24	Endothelial	JAM2
ARL2	1.54426e-28	0.462579	0.459	0.21	3.37066e-24	Endothelial	ARL2
MX1	1.55524e-28	0.548466	0.318	0.124	3.39463e-24	Endothelial	MX1
CD9	1.78772e-28	0.565099	0.368	0.152	3.90205e-24	Endothelial	CD9
PFKL	3.57334e-28	0.322429	0.315	0.116	7.79952e-24	Endothelial	PFKL
ATP1B3	1.21305e-27	0.291412	0.265	0.089	2.64773e-23	Endothelial	ATP1B3
PSME2	1.58047e-27	0.497861	0.559	0.297	3.44969e-23	Endothelial	PSME2
LOC116273623	2.66439e-27	0.773115	0.765	0.491	5.81557e-23	Endothelial	LOC116273623
MGLL	9.41683e-27	0.588696	0.435	0.208	2.05541e-22	Endothelial	MGLL
AFDN	9.75743e-27	0.415866	0.45	0.211	2.12976e-22	Endothelial	AFDN
ERBIN	1.44447e-26	0.383825	0.356	0.145	3.15285e-22	Endothelial	ERBIN
BTG2	2.51988e-26	0.556675	0.359	0.155	5.50014e-22	Endothelial	BTG2
LEPROT	6.78055e-26	0.342294	0.382	0.161	1.47999e-21	Endothelial	LEPROT
LOC101018472	1.91951e-25	0.428881	0.397	0.178	4.18971e-21	Endothelial	LOC101018472
LOC101003015	2.47428e-25	0.303807	0.291	0.108	5.40061e-21	Endothelial	LOC101003015
CMPK1	2.54265e-25	0.356099	0.259	0.091	5.54985e-21	Endothelial	CMPK1
GTF3A	3.36539e-25	0.415526	0.356	0.151	7.34565e-21	Endothelial	GTF3A
GAPDH	3.5032e-25	0.479322	0.788	0.604	7.64644e-21	Endothelial	GAPDH
MGMT	5.7898e-25	0.351121	0.294	0.112	1.26374e-20	Endothelial	MGMT
ARRDC3	6.78661e-25	0.367001	0.262	0.094	1.48131e-20	Endothelial	ARRDC3
PDCD4	7.11605e-25	0.482972	0.426	0.203	1.55322e-20	Endothelial	PDCD4
LOC101018493	9.74272e-25	0.402821	0.512	0.261	2.12654e-20	Endothelial	LOC101018493
LOC103876646	2.76547e-24	0.480058	0.503	0.263	6.03618e-20	Endothelial	LOC103876646
AKAP12	3.15215e-24	0.371817	0.409	0.186	6.88021e-20	Endothelial	AKAP12
BMPR2	3.20119e-24	0.445746	0.326	0.136	6.98724e-20	Endothelial	BMPR2
RALB	3.48851e-24	0.430818	0.332	0.141	7.61438e-20	Endothelial	RALB
ATP2B1	6.19053e-24	0.477963	0.447	0.22	1.35121e-19	Endothelial	ATP2B1
TAX1BP3	8.55381e-24	0.364887	0.371	0.162	1.86704e-19	Endothelial	TAX1BP3
CTNNB1	1.51778e-23	0.512886	0.618	0.355	3.31287e-19	Endothelial	CTNNB1
PICALM	1.61936e-23	0.351873	0.312	0.127	3.53458e-19	Endothelial	PICALM
VASP	2.01689e-23	0.281024	0.271	0.101	4.40226e-19	Endothelial	VASP
REXO2	3.7693e-23	0.398651	0.35	0.153	8.22726e-19	Endothelial	REXO2
PHC2	4.74143e-23	0.329697	0.276	0.108	1.03491e-18	Endothelial	PHC2
IFI44L	5.25674e-23	0.399671	0.353	0.156	1.14739e-18	Endothelial	IFI44L
MLLT6	6.37523e-23	0.315729	0.288	0.115	1.39152e-18	Endothelial	MLLT6
PPDPF	6.85291e-23	0.477234	0.576	0.337	1.49579e-18	Endothelial	PPDPF
SAV1	6.85669e-23	0.309819	0.276	0.107	1.49661e-18	Endothelial	SAV1
ISG15	9.36844e-23	0.602833	0.456	0.236	2.04485e-18	Endothelial	ISG15
PSME1	1.4453e-22	0.486054	0.665	0.429	3.15466e-18	Endothelial	PSME1
RAB11A	1.49629e-22	0.471128	0.497	0.269	3.26594e-18	Endothelial	RAB11A
MEF2A	2.12411e-22	0.412854	0.391	0.183	4.63629e-18	Endothelial	MEF2A
SHFL	2.45625e-22	0.312315	0.335	0.144	5.36126e-18	Endothelial	SHFL
PELO	3.33772e-22	0.346585	0.256	0.097	7.28525e-18	Endothelial	PELO
MYH9	4.26395e-22	0.477147	0.459	0.237	9.30692e-18	Endothelial	MYH9
ABHD17A	6.25777e-22	0.395205	0.35	0.157	1.36588e-17	Endothelial	ABHD17A
PSMB10	6.69691e-22	0.3662	0.262	0.101	1.46174e-17	Endothelial	PSMB10
IFI35	2.08869e-21	0.351336	0.35	0.156	4.55898e-17	Endothelial	IFI35
NR3C1	2.33688e-21	0.256959	0.288	0.116	5.10071e-17	Endothelial	NR3C1
LOC116270266	5.24373e-21	0.318453	0.294	0.121	1.14455e-16	Endothelial	LOC116270266
KLF13	6.27294e-21	0.352826	0.362	0.169	1.36919e-16	Endothelial	KLF13
N4BP1	2.21966e-20	0.310099	0.274	0.113	4.84486e-16	Endothelial	N4BP1
ZBTB7A	2.95797e-20	0.307908	0.338	0.152	6.45637e-16	Endothelial	ZBTB7A
SMAD5	3.06614e-20	0.375277	0.453	0.235	6.69246e-16	Endothelial	SMAD5
ANKRD10	5.94441e-20	0.282279	0.291	0.123	1.29749e-15	Endothelial	ANKRD10
PSMA7	6.61779e-20	0.423182	0.579	0.351	1.44447e-15	Endothelial	PSMA7
HEG1	6.71947e-20	0.32262	0.309	0.135	1.46666e-15	Endothelial	HEG1
ITGB1BP1	9.52239e-20	0.324036	0.253	0.101	2.07845e-15	Endothelial	ITGB1BP1
LRP10	1.0431e-19	0.268254	0.288	0.121	2.27678e-15	Endothelial	LRP10
CYSTM1	1.10003e-19	0.319135	0.276	0.116	2.40104e-15	Endothelial	CYSTM1
DPYSL2	1.33214e-19	0.372439	0.465	0.247	2.90766e-15	Endothelial	DPYSL2
SEPTIN2	1.87343e-19	0.363536	0.509	0.282	4.08913e-15	Endothelial	SEPTIN2
ATG5	2.27249e-19	0.263776	0.274	0.113	4.96017e-15	Endothelial	ATG5
ARHGDIA	3.34595e-19	0.315719	0.432	0.219	7.30322e-15	Endothelial	ARHGDIA
EFCAB14	9.58415e-19	0.352449	0.312	0.141	2.09193e-14	Endothelial	EFCAB14
CCND3	1.30469e-18	0.331909	0.318	0.146	2.84774e-14	Endothelial	CCND3
STAT1	1.41167e-18	0.355254	0.329	0.155	3.08125e-14	Endothelial	STAT1
TSC22D1	2.29374e-18	0.493254	0.568	0.364	5.00655e-14	Endothelial	TSC22D1
KLF6	3.4145e-18	0.347243	0.376	0.189	7.45282e-14	Endothelial	KLF6
LOC101015786	3.48529e-18	0.403081	0.576	0.351	7.60734e-14	Endothelial	LOC101015786
HES1	4.15823e-18	0.493455	0.656	0.438	9.07617e-14	Endothelial	HES1
LOC101000155	5.13815e-18	0.695121	0.635	0.451	1.1215e-13	Endothelial	LOC101000155
MAP7D1	6.41617e-18	0.261822	0.253	0.104	1.40046e-13	Endothelial	MAP7D1
PPP1R2	8.34652e-18	0.295416	0.291	0.129	1.8218e-13	Endothelial	PPP1R2
NOP10	9.21717e-18	0.360601	0.591	0.359	2.01183e-13	Endothelial	NOP10
CTTN	9.62985e-18	0.267284	0.309	0.139	2.10191e-13	Endothelial	CTTN
CLSTN1	1.16287e-17	0.297637	0.315	0.145	2.53819e-13	Endothelial	CLSTN1
DAZAP2	1.18012e-17	0.25829	0.374	0.183	2.57584e-13	Endothelial	DAZAP2
OSTF1	1.35914e-17	0.361003	0.306	0.141	2.9666e-13	Endothelial	OSTF1
CISD3	1.5197e-17	0.334573	0.291	0.132	3.31705e-13	Endothelial	CISD3
LIMS1	1.5542e-17	0.257161	0.315	0.145	3.39234e-13	Endothelial	LIMS1
WSB1	2.2591e-17	0.334942	0.409	0.215	4.93094e-13	Endothelial	WSB1
YBX1	4.76741e-17	0.388121	0.762	0.597	1.04058e-12	Endothelial	YBX1
ZNRF1	4.79331e-17	0.257723	0.297	0.136	1.04624e-12	Endothelial	ZNRF1
NFE2L1	1.49703e-16	0.332019	0.456	0.254	3.26756e-12	Endothelial	NFE2L1
ADIRF	2.03358e-16	0.260303	0.406	0.214	4.4387e-12	Endothelial	ADIRF
DDX3X	2.19915e-16	0.329058	0.356	0.182	4.80008e-12	Endothelial	DDX3X
SELENOK	2.45528e-16	0.395254	0.6	0.379	5.35914e-12	Endothelial	SELENOK
ADAR	3.06237e-16	0.437695	0.403	0.221	6.68424e-12	Endothelial	ADAR
RAP1A	3.13293e-16	0.319704	0.406	0.215	6.83825e-12	Endothelial	RAP1A
HIPK3	3.52312e-16	0.261177	0.262	0.116	7.68992e-12	Endothelial	HIPK3
SH3BP5	5.2901e-16	0.447483	0.559	0.348	1.15467e-11	Endothelial	SH3BP5
PAK2	5.87682e-16	0.326879	0.391	0.207	1.28273e-11	Endothelial	PAK2
ATF3	8.56959e-16	0.424722	0.315	0.155	1.87048e-11	Endothelial	ATF3
NADK	8.82415e-16	0.38751	0.338	0.172	1.92605e-11	Endothelial	NADK
LOC101016759	1.14408e-15	0.376224	0.753	0.592	2.49719e-11	Endothelial	LOC101016759
JUP	1.75614e-15	0.296635	0.318	0.156	3.83313e-11	Endothelial	JUP
POLR2L	2.11897e-15	0.405352	0.656	0.445	4.62507e-11	Endothelial	POLR2L
ROCK2	2.68111e-15	0.251797	0.262	0.12	5.85206e-11	Endothelial	ROCK2
SLC39A10	3.00916e-15	0.417922	0.326	0.168	6.56808e-11	Endothelial	SLC39A10
KLF3	5.36018e-15	0.265759	0.274	0.129	1.16997e-10	Endothelial	KLF3
ITPRID2	5.76014e-15	0.418547	0.441	0.255	1.25726e-10	Endothelial	ITPRID2
RUNX1T1	1.17486e-14	0.398912	0.459	0.273	2.56437e-10	Endothelial	RUNX1T1
FCGRT	1.66864e-14	0.38568	0.665	0.481	3.64213e-10	Endothelial	FCGRT
RHOC	2.12593e-14	0.42804	0.571	0.38	4.64027e-10	Endothelial	RHOC
SCP2	2.2306e-14	0.308723	0.479	0.279	4.86874e-10	Endothelial	SCP2
EIF2AK2	2.47204e-14	0.360271	0.303	0.151	5.39571e-10	Endothelial	EIF2AK2
PCBP1	2.48621e-14	0.371745	0.579	0.38	5.42665e-10	Endothelial	PCBP1
DUSP1	2.83259e-14	0.399739	0.574	0.399	6.18269e-10	Endothelial	DUSP1
IL6ST	3.61012e-14	0.3915	0.497	0.307	7.87982e-10	Endothelial	IL6ST
LIMCH1	4.03093e-14	0.304717	0.532	0.328	8.79832e-10	Endothelial	LIMCH1
LOC103878060	6.34253e-14	0.347843	0.362	0.197	1.38439e-09	Endothelial	LOC103878060
CDC42EP1	7.18774e-14	0.333887	0.332	0.172	1.56887e-09	Endothelial	CDC42EP1
SLC39A1	7.40358e-14	0.305928	0.309	0.154	1.61598e-09	Endothelial	SLC39A1
TPST2	8.37457e-14	0.353028	0.382	0.214	1.82792e-09	Endothelial	TPST2
HERPUD1	1.57327e-13	0.287329	0.371	0.2	3.43398e-09	Endothelial	HERPUD1
CDC42	1.74342e-13	0.367206	0.544	0.339	3.80537e-09	Endothelial	CDC42
FOXP1	1.85106e-13	0.31757	0.397	0.225	4.0403e-09	Endothelial	FOXP1
GLUL	2.71596e-13	0.340034	0.288	0.145	5.92813e-09	Endothelial	GLUL
RPL36AL	2.9391e-13	0.35764	0.309	0.16	6.41518e-09	Endothelial	RPL36AL
SERTAD1	4.91573e-13	0.355583	0.374	0.21	1.07296e-08	Endothelial	SERTAD1
POMP	6.01855e-13	0.368793	0.574	0.377	1.31367e-08	Endothelial	POMP
ISCU	8.57668e-13	0.329724	0.429	0.25	1.87203e-08	Endothelial	ISCU
LOC101021735	1.15329e-12	0.269305	0.45	0.267	2.5173e-08	Endothelial	LOC101021735
CTNNA1	1.76578e-12	0.255037	0.335	0.182	3.85417e-08	Endothelial	CTNNA1
OAS1	1.95114e-12	0.293985	0.335	0.184	4.25875e-08	Endothelial	OAS1
CALM1	2.93469e-12	0.405451	0.762	0.653	6.40556e-08	Endothelial	CALM1
ACTN4	4.89481e-12	0.276611	0.409	0.24	1.06839e-07	Endothelial	ACTN4
FRG1	6.85944e-12	0.299698	0.347	0.195	1.49721e-07	Endothelial	FRG1
BLOC1S1	6.89356e-12	0.356167	0.626	0.431	1.50466e-07	Endothelial	BLOC1S1
LOC116272145	7.56794e-12	0.279597	0.574	0.376	1.65185e-07	Endothelial	LOC116272145
ROCK1	7.88335e-12	0.253773	0.309	0.167	1.7207e-07	Endothelial	ROCK1
SYNPO	1.01851e-11	0.305869	0.285	0.151	2.22311e-07	Endothelial	SYNPO
CD59	1.06887e-11	0.362676	0.597	0.415	2.33302e-07	Endothelial	CD59
EFNB1	1.15459e-11	0.277094	0.309	0.168	2.52013e-07	Endothelial	EFNB1
WASF2	1.18482e-11	0.256825	0.444	0.268	2.5861e-07	Endothelial	WASF2
HINT1	1.40364e-11	0.272517	0.768	0.608	3.06372e-07	Endothelial	HINT1
PRPSAP1	1.44728e-11	0.290564	0.329	0.183	3.15899e-07	Endothelial	PRPSAP1
NFKBIA	1.64198e-11	0.380992	0.612	0.453	3.58395e-07	Endothelial	NFKBIA
TPD52	1.73933e-11	0.278051	0.268	0.139	3.79643e-07	Endothelial	TPD52
LOC101017841	2.06615e-11	0.274003	0.453	0.274	4.50979e-07	Endothelial	LOC101017841
LOC101020479	2.2984e-11	0.340425	0.579	0.398	5.01673e-07	Endothelial	LOC101020479
TINAGL1	2.98841e-11	0.354863	0.406	0.249	6.5228e-07	Endothelial	TINAGL1
GRN	3.58843e-11	0.261531	0.391	0.227	7.83246e-07	Endothelial	GRN
RAI14	4.01084e-11	0.268568	0.303	0.166	8.75445e-07	Endothelial	RAI14
GADD45A	4.08227e-11	0.271462	0.303	0.165	8.91038e-07	Endothelial	GADD45A
PIN4	7.35311e-11	0.260162	0.379	0.224	1.60496e-06	Endothelial	PIN4
LSM6	1.01198e-10	0.292244	0.512	0.331	2.20884e-06	Endothelial	LSM6
LOC103877567	2.25616e-10	0.263223	0.344	0.2	4.92451e-06	Endothelial	LOC103877567
LOC116273772	2.39795e-10	0.2608	0.603	0.41	5.23401e-06	Endothelial	LOC116273772
GNB1	3.33168e-10	0.257466	0.382	0.231	7.27206e-06	Endothelial	GNB1
RALA	5.26929e-10	0.29213	0.335	0.196	1.15013e-05	Endothelial	RALA
ITGB1	5.92548e-10	0.340566	0.641	0.499	1.29336e-05	Endothelial	ITGB1
COL18A1	6.26867e-10	0.300904	0.403	0.25	1.36826e-05	Endothelial	COL18A1
YWHAB	1.19784e-09	0.270174	0.612	0.435	2.61452e-05	Endothelial	YWHAB
C12H11orf96	1.51922e-09	0.317651	0.509	0.362	3.316e-05	Endothelial	C12H11orf96
LOC101025557	1.62512e-09	0.286747	0.335	0.199	3.54715e-05	Endothelial	LOC101025557
LOC101001617	1.78796e-09	0.304095	0.421	0.264	3.90258e-05	Endothelial	LOC101001617
CNN3	1.8023e-09	0.273822	0.556	0.378	3.93387e-05	Endothelial	CNN3
ATP5ME	2.74474e-09	0.268825	0.656	0.482	5.99094e-05	Endothelial	ATP5ME
RABGAP1	2.87323e-09	0.251435	0.262	0.145	6.27141e-05	Endothelial	RABGAP1
APRT	3.78649e-09	0.262245	0.382	0.236	8.26476e-05	Endothelial	APRT
ZFYVE16	6.73959e-09	0.271537	0.285	0.167	0.000147105	Endothelial	ZFYVE16
UGCG	7.75631e-09	0.25539	0.324	0.193	0.000169297	Endothelial	UGCG
NDUFA8	8.41412e-09	0.296862	0.497	0.345	0.000183655	Endothelial	NDUFA8
COL4A2	1.79037e-08	0.327869	0.441	0.297	0.000390785	Endothelial	COL4A2
EIF5A	2.87038e-08	0.25886	0.356	0.225	0.000626518	Endothelial	EIF5A
HEBP1	3.33355e-08	0.269847	0.5	0.333	0.000727613	Endothelial	HEBP1
IGFBP2	3.80065e-08	0.368617	0.685	0.543	0.000829568	Endothelial	IGFBP2
ULK4	7.27838e-08	0.412976	0.479	0.34	0.00158865	Endothelial	ULK4
CDC26	1.11227e-07	0.257372	0.341	0.214	0.00242775	Endothelial	CDC26
SEM1-1	1.26086e-07	0.262036	0.685	0.544	0.00275209	Endothelial	SEM1-1
CDC37	2.71954e-07	0.266698	0.482	0.333	0.00593593	Endothelial	CDC37
APOA1	4.4773e-07	1.18534	0.538	0.469	0.0097726	Endothelial	APOA1
LOC101023741	3.58454e-06	0.303452	0.3	0.2	0.0782398	Endothelial	LOC101023741
ERP29	3.80329e-06	0.258944	0.529	0.392	0.0830145	Endothelial	ERP29
GPS2	6.14151e-05	0.268656	0.497	0.363	1	Endothelial	GPS2
RGS5	0	3.98785	0.763	0.01	0	PTM	RGS5
LOC101020469	0	3.2368	0.859	0.027	0	PTM	LOC101020469
CRIP11	0	2.95991	0.885	0.082	0	PTM	CRIP1
ACTA2	0	2.93344	0.506	0.003	0	PTM	ACTA2
PLAC9	0	2.45777	0.808	0.067	0	PTM	PLAC9
NOTCH3	0	2.12056	0.718	0.013	0	PTM	NOTCH3
HIGD1B	0	2.10505	0.506	0.003	0	PTM	HIGD1B
PTP4A31	0	1.94014	0.532	0.024	0	PTM	PTP4A3
PDGFRB	0	1.9376	0.647	0.028	0	PTM	PDGFRB
CAV11	0	1.71843	0.506	0.019	0	PTM	CAV1
IMPA2	0	1.65821	0.494	0.022	0	PTM	IMPA2
NDUFA4L2	0	1.65169	0.449	0.008	0	PTM	NDUFA4L2
RERGL	0	1.5022	0.321	0.002	0	PTM	RERGL
GJA4	0	1.43162	0.41	0.014	0	PTM	GJA4
LOC103884764	0	1.31837	0.308	0.003	0	PTM	LOC103884764
PLAAT2	0	1.1373	0.321	0.006	0	PTM	PLAAT2
FOXS1	0	1.12844	0.346	0.008	0	PTM	FOXS1
CSPG4	0	1.12604	0.308	0.005	0	PTM	CSPG4
PGF	0	1.10176	0.288	0.007	0	PTM	PGF
MAP3K7CL	0	1.10028	0.269	0.004	0	PTM	MAP3K7CL
RERG	0	0.845771	0.256	0.004	0	PTM	RERG
LOC101019829	0	0.817413	0.256	0.003	0	PTM	LOC101019829
LBH	1.78208e-285	1.51234	0.429	0.018	3.88974e-281	PTM	LBH
TAGLN	1.20399e-278	3.26101	0.667	0.049	2.62794e-274	PTM	TAGLN
ANO1	9.29559e-266	1.07602	0.301	0.009	2.02895e-261	PTM	ANO1
RGS16	4.34983e-257	1.28291	0.333	0.012	9.49436e-253	PTM	RGS16
RCAN2	9.60537e-245	1.36419	0.41	0.019	2.09656e-240	PTM	RCAN2
LOC1010206711	8.09723e-224	1.13388	0.353	0.015	1.76738e-219	PTM	LOC101020671
ACTN1	8.44578e-222	1.08072	0.327	0.013	1.84346e-217	PTM	ACTN1
BGN	2.5355e-208	1.459	0.474	0.031	5.53424e-204	PTM	BGN
LOC1162753121	1.52956e-201	1.11223	0.282	0.011	3.33857e-197	PTM	LOC116275312
HES4	5.29855e-194	1.12389	0.321	0.015	1.15651e-189	PTM	HES4
CPE	3.0425e-190	1.86922	0.724	0.081	6.64086e-186	PTM	CPE
MYH11	2.51347e-189	1.99264	0.462	0.033	5.48616e-185	PTM	MYH11
ARHGAP291	4.18112e-185	1.32506	0.513	0.041	9.12612e-181	PTM	ARHGAP29
NRARP	3.13209e-183	0.944159	0.269	0.011	6.83642e-179	PTM	NRARP
S1PR3	6.22337e-181	1.11727	0.333	0.017	1.35838e-176	PTM	S1PR3
SMTN1	4.46469e-179	0.931043	0.276	0.012	9.74508e-175	PTM	SMTN
CAV21	2.7188e-166	1.21858	0.423	0.03	5.93432e-162	PTM	CAV2
DBNDD2	8.28042e-162	1.32797	0.449	0.036	1.80737e-157	PTM	DBNDD2
MCAM1	3.67803e-161	1.83338	0.647	0.079	8.02803e-157	PTM	MCAM
CRIP21	7.13969e-157	1.38361	0.436	0.035	1.55838e-152	PTM	CRIP2
EDNRA	1.63015e-154	0.930671	0.282	0.014	3.55813e-150	PTM	EDNRA
MYO1B1	4.72095e-152	0.918302	0.288	0.015	1.03044e-147	PTM	MYO1B
CD84	4.29402e-150	1.25826	0.314	0.019	9.37255e-146	PTM	CD84
JAG11	8.04047e-149	1.25266	0.404	0.031	1.75499e-144	PTM	JAG1
CCND1	4.78903e-140	0.905957	0.256	0.013	1.0453e-135	PTM	CCND1
ATP1A2	2.49222e-135	1.17141	0.353	0.026	5.43977e-131	PTM	ATP1A2
TPM2	7.51142e-134	2.77556	0.75	0.137	1.63952e-129	PTM	TPM2
GPRC5C	5.59315e-132	0.908135	0.301	0.019	1.22082e-127	PTM	GPRC5C
EPS8	7.42442e-132	1.20303	0.417	0.037	1.62053e-127	PTM	EPS8
IGFBP71	4.31866e-131	2.20617	0.923	0.226	9.42633e-127	PTM	IGFBP7
CAVIN31	9.31174e-127	1.34406	0.5	0.056	2.03247e-122	PTM	CAVIN3
ADIRF1	6.13488e-120	2.64035	0.846	0.213	1.33906e-115	PTM	ADIRF
NGF	2.6773e-117	0.863557	0.263	0.016	5.84374e-113	PTM	NGF
TMEM51	2.15405e-114	1.23727	0.436	0.048	4.70164e-110	PTM	TMEM51
MFGE8	6.09281e-113	1.81584	0.763	0.165	1.32988e-108	PTM	MFGE8
EBF11	1.22494e-111	1.4052	0.667	0.107	2.67368e-107	PTM	EBF1
LOC1010214931	4.74904e-111	1.48309	0.391	0.039	1.03657e-106	PTM	LOC101021493
EMP21	1.01778e-110	1.23984	0.404	0.041	2.22151e-106	PTM	EMP2
TPPP3	1.09039e-108	1.31396	0.359	0.034	2.37998e-104	PTM	TPPP3
STOM1	4.7767e-108	1.29124	0.462	0.056	1.04261e-103	PTM	STOM
ECRG4	6.00638e-107	1.72604	0.833	0.212	1.31101e-102	PTM	ECRG4
TINAGL11	1.32408e-104	1.83127	0.853	0.247	2.89008e-100	PTM	TINAGL1
CALD1	9.46965e-102	1.81333	0.897	0.284	2.06694e-97	PTM	CALD1
TPM1	1.81402e-101	1.93805	0.455	0.06	3.95947e-97	PTM	TPM1
KANK2	1.4243e-86	1.0863	0.365	0.043	3.10881e-82	PTM	KANK2
MEF2C1	6.72246e-84	1.64208	0.776	0.225	1.46731e-79	PTM	MEF2C
OAZ21	2.45397e-81	1.70722	0.769	0.232	5.35627e-77	PTM	OAZ2
TBX2	2.22627e-80	0.967999	0.34	0.039	4.85927e-76	PTM	TBX2
ADAMTS1	5.775e-80	1.34485	0.314	0.034	1.26051e-75	PTM	ADAMTS1
ARHGEF7	4.34043e-75	1.10592	0.41	0.062	9.47385e-71	PTM	ARHGEF7
SOD3	8.17922e-75	1.18801	0.532	0.097	1.78528e-70	PTM	SOD3
EPAS11	7.93742e-74	0.989962	0.359	0.048	1.7325e-69	PTM	EPAS1
GSN1	5.04706e-73	1.13859	0.551	0.106	1.10162e-68	PTM	GSN
CCDC80	2.10855e-72	1.05066	0.372	0.051	4.60232e-68	PTM	CCDC80
PPP1R12B	1.74822e-66	1.29512	0.449	0.083	3.81585e-62	PTM	PPP1R12B
TMSB4X1	1.95884e-65	1.23295	0.936	0.436	4.27555e-61	PTM	TMSB4X
RBPMS1	2.93167e-65	0.878168	0.404	0.063	6.39895e-61	PTM	RBPMS
PAM1	8.66484e-64	1.03352	0.353	0.052	1.89127e-59	PTM	PAM
NDRG4	9.44457e-59	0.875785	0.282	0.037	2.06147e-54	PTM	NDRG4
FXYD1	1.86959e-58	1.07961	0.667	0.175	4.08074e-54	PTM	FXYD1
RRAS1	5.88612e-58	0.815986	0.314	0.045	1.28476e-53	PTM	RRAS
LHFPL6	7.55398e-58	0.953618	0.564	0.126	1.64881e-53	PTM	LHFPL6
ZFHX3	1.06714e-57	0.841739	0.295	0.041	2.32926e-53	PTM	ZFHX3
C1QTNF1	1.08063e-57	1.18236	0.404	0.075	2.35869e-53	PTM	C1QTNF1
EFHD1	2.09823e-55	0.84737	0.256	0.033	4.57982e-51	PTM	EFHD1
ID31	1.21291e-52	1.33131	0.487	0.116	2.64741e-48	PTM	ID3
NR2F2	4.06049e-52	1.06316	0.628	0.169	8.86283e-48	PTM	NR2F2
TGFB1I1	9.53813e-50	0.999564	0.436	0.096	2.08189e-45	PTM	TGFB1I1
MAPRE2	7.59777e-48	0.875561	0.301	0.05	1.65836e-43	PTM	MAPRE2
RASL11A	8.04632e-48	0.777569	0.256	0.036	1.75627e-43	PTM	RASL11A
GNG111	4.85931e-47	0.812195	0.429	0.091	1.06064e-42	PTM	GNG11
TSC22D11	1.12746e-46	1.21912	0.788	0.365	2.4609e-42	PTM	TSC22D1
TAGLN21	5.05022e-46	0.942888	0.404	0.087	1.10231e-41	PTM	TAGLN2
MYL9	2.17322e-45	1.8288	0.827	0.536	4.74348e-41	PTM	MYL9
DLC1	3.48632e-45	1.00338	0.34	0.063	7.60959e-41	PTM	DLC1
SPARCL11	1.96668e-44	1.29214	0.814	0.432	4.29268e-40	PTM	SPARCL1
HSPB11	7.80235e-44	1.21377	0.583	0.191	1.70302e-39	PTM	HSPB1
MAP3K20	2.51071e-42	1.22963	0.667	0.278	5.48012e-38	PTM	MAP3K20
TCIM1	4.00898e-42	0.900798	0.288	0.049	8.7504e-38	PTM	TCIM
NDRG2	1.20939e-40	0.933667	0.442	0.109	2.63973e-36	PTM	NDRG2
C12H11orf961	4.13951e-40	1.59935	0.776	0.361	9.03531e-36	PTM	C12H11orf96
APOD1	4.90531e-40	0.879667	0.436	0.105	1.07068e-35	PTM	APOD
RBMS31	1.07727e-38	0.761341	0.359	0.076	2.35135e-34	PTM	RBMS3
CAMK2N1	1.55673e-37	0.956575	0.397	0.1	3.39788e-33	PTM	CAMK2N1
ARPC1A	7.46378e-36	1.14456	0.66	0.298	1.62912e-31	PTM	ARPC1A
WTIP	1.03156e-35	0.950479	0.301	0.065	2.25158e-31	PTM	WTIP
IER21	1.90258e-35	1.21977	0.545	0.179	4.15276e-31	PTM	IER2
CSRP1	5.66072e-35	1.25685	0.449	0.144	1.23557e-30	PTM	CSRP1
CYGB	2.04424e-34	1.09572	0.295	0.062	4.46197e-30	PTM	CYGB
S100A61	4.08025e-33	1.1161	0.391	0.103	8.90595e-29	PTM	S100A6
TNS1	1.82066e-30	1.0161	0.468	0.163	3.97395e-26	PTM	TNS1
ZBTB161	4.30254e-30	0.558069	0.314	0.071	9.39114e-26	PTM	ZBTB16
UTRN1	2.31032e-27	0.979959	0.455	0.164	5.04273e-23	PTM	UTRN
IGFBP5	3.26277e-27	1.00497	0.692	0.353	7.12166e-23	PTM	IGFBP5
MSRB3	4.46818e-27	0.775006	0.269	0.063	9.7527e-23	PTM	MSRB3
HES11	2.10494e-25	1.04155	0.737	0.44	4.59444e-21	PTM	HES1
MTHFD2	3.68918e-24	0.695663	0.256	0.063	8.05238e-20	PTM	MTHFD2
ITIH5	2.03502e-22	0.838374	0.321	0.1	4.44183e-18	PTM	ITIH5
COL6A2	2.38308e-22	0.742386	0.455	0.16	5.20156e-18	PTM	COL6A2
SEPTIN7	3.34605e-22	0.870492	0.737	0.493	7.30342e-18	PTM	SEPTIN7
BTG11	4.46205e-22	0.660911	0.821	0.531	9.73931e-18	PTM	BTG1
AOPEP1	4.67003e-22	0.80789	0.391	0.144	1.01933e-17	PTM	AOPEP
COL4A11	7.61799e-22	1.15464	0.404	0.155	1.66278e-17	PTM	COL4A1
SELENOM	7.97474e-22	0.861551	0.635	0.341	1.74065e-17	PTM	SELENOM
MYL6	1.10626e-21	1.06164	0.885	0.811	2.41462e-17	PTM	MYL6
SPRY1	2.04504e-21	0.768374	0.321	0.099	4.4637e-17	PTM	SPRY1
CHCHD10	5.62743e-21	0.841637	0.429	0.179	1.2283e-16	PTM	CHCHD10
ZFP361	8.59551e-21	1.10074	0.462	0.196	1.87614e-16	PTM	ZFP36
DSTN	1.0139e-20	1.04694	0.782	0.619	2.21304e-16	PTM	DSTN
MYLK	2.85309e-20	0.989017	0.538	0.265	6.22744e-16	PTM	MYLK
GUCY1B1	3.01326e-20	0.872782	0.404	0.162	6.57704e-16	PTM	GUCY1B1
LOC1010030151	6.49475e-20	0.64191	0.333	0.11	1.41761e-15	PTM	LOC101003015
IGFBP61	1.04955e-19	0.705075	0.333	0.105	2.29085e-15	PTM	IGFBP6
TNNT1	1.11583e-19	0.792015	0.269	0.08	2.43552e-15	PTM	TNNT1
SOCS31	2.1561e-19	0.547215	0.288	0.083	4.70612e-15	PTM	SOCS3
SERPINH11	4.6723e-19	0.775971	0.449	0.185	1.01982e-14	PTM	SERPINH1
MPRIP	8.11973e-19	0.708628	0.365	0.137	1.77229e-14	PTM	MPRIP
LGALS1	1.08342e-18	0.629243	0.635	0.323	2.36478e-14	PTM	LGALS1
PRKG1	1.66287e-18	0.521291	0.34	0.115	3.62955e-14	PTM	PRKG1
IGFBP41	1.96168e-18	0.426398	0.551	0.229	4.28176e-14	PTM	IGFBP4
NUDT4	7.57565e-18	0.755787	0.385	0.156	1.65354e-13	PTM	NUDT4
CTDSPL	8.302e-18	0.577201	0.282	0.092	1.81208e-13	PTM	CTDSPL
UBA2	1.19031e-17	0.750166	0.391	0.159	2.59809e-13	PTM	UBA2
GAPDH1	1.96579e-17	0.713718	0.769	0.606	4.29073e-13	PTM	GAPDH
EVA1B1	2.58753e-17	0.772996	0.5	0.243	5.64781e-13	PTM	EVA1B
NUPR1	2.73871e-17	0.569818	0.359	0.13	5.97777e-13	PTM	NUPR1
BCAM1	3.17077e-17	0.619911	0.75	0.506	6.92084e-13	PTM	BCAM
YBX11	5.94332e-17	0.684025	0.795	0.598	1.29725e-12	PTM	YBX1
EPN2	9.33142e-17	0.699409	0.269	0.087	2.03677e-12	PTM	EPN2
LPP	1.25687e-16	0.891223	0.359	0.149	2.74337e-12	PTM	LPP
LOC1162727831	1.73233e-16	0.660357	0.564	0.307	3.78115e-12	PTM	LOC116272783
CEBPD1	5.8393e-16	0.826531	0.365	0.147	1.27454e-11	PTM	CEBPD
NET11	6.01377e-16	0.744332	0.256	0.085	1.31263e-11	PTM	NET1
IQGAP11	1.22373e-15	0.815873	0.365	0.155	2.67103e-11	PTM	IQGAP1
PALLD	3.49089e-15	0.848788	0.385	0.175	7.61956e-11	PTM	PALLD
RHOB1	8.3691e-15	0.568481	0.66	0.421	1.82672e-10	PTM	RHOB
PTEN	1.76153e-14	0.645034	0.276	0.1	3.84489e-10	PTM	PTEN
ROCK11	3.6787e-14	0.724599	0.372	0.168	8.02949e-10	PTM	ROCK1
PPP1R14A	4.3663e-14	0.665407	0.712	0.533	9.53032e-10	PTM	PPP1R14A
SMIM3	9.54961e-14	0.808825	0.288	0.113	2.08439e-09	PTM	SMIM3
CTBP21	1.2029e-13	0.675682	0.301	0.121	2.62556e-09	PTM	CTBP2
KLHL23	3.65363e-13	0.764282	0.353	0.163	7.97477e-09	PTM	KLHL23
LOC1010157861	6.7711e-13	0.600963	0.571	0.353	1.47793e-08	PTM	LOC101015786
VASP1	8.31439e-13	0.576712	0.269	0.103	1.81478e-08	PTM	VASP
PPIC	1.29556e-12	0.563227	0.397	0.189	2.82783e-08	PTM	PPIC
ITGB11	1.54475e-12	0.660367	0.692	0.499	3.37172e-08	PTM	ITGB1
PPP1R12A	1.43223e-11	0.56274	0.417	0.221	3.12613e-07	PTM	PPP1R12A
RPL10	1.83315e-11	0.277043	1	0.983	4.00122e-07	PTM	RPL10
LMOD1	2.84438e-11	0.707836	0.327	0.156	6.20842e-07	PTM	LMOD1
PRSS23	3.31176e-11	0.878187	0.455	0.272	7.22858e-07	PTM	PRSS23
BTG21	3.62637e-11	0.876221	0.327	0.156	7.91528e-07	PTM	BTG2
LOC1010237411	6.23084e-11	0.713034	0.385	0.2	1.36e-06	PTM	LOC101023741
S100A111	8.86727e-11	0.570654	0.59	0.375	1.93546e-06	PTM	S100A11
SH3BGRL	3.36269e-10	0.538023	0.538	0.36	7.33975e-06	PTM	SH3BGRL
LOC101010496	4.15172e-10	0.462304	0.359	0.179	9.06195e-06	PTM	LOC101010496
EEF2	4.18319e-10	0.580403	0.692	0.552	9.13065e-06	PTM	EEF2
TSHZ2	8.7488e-10	0.326655	0.308	0.131	1.9096e-05	PTM	TSHZ2
PICALM1	8.85534e-10	0.512966	0.282	0.129	1.93286e-05	PTM	PICALM
CD81	1.26527e-09	0.430551	0.853	0.705	2.7617e-05	PTM	CD81
CD1511	1.44391e-09	0.519512	0.359	0.188	3.15163e-05	PTM	CD151
LOC1009993181	1.47987e-09	0.49052	0.615	0.436	3.23012e-05	PTM	LOC100999318
DBI1	2.13576e-09	0.554764	0.321	0.16	4.66172e-05	PTM	DBI
COL4A21	4.92578e-09	0.746613	0.462	0.298	0.000107515	PTM	COL4A2
RTN4	4.92814e-09	0.523265	0.372	0.199	0.000107566	PTM	RTN4
B2M1	5.77582e-09	0.58871	0.744	0.589	0.000126069	PTM	B2M
LOC101005729	4.94077e-08	0.376234	0.256	0.118	0.00107842	PTM	LOC101005729
ANXA5	5.42233e-08	0.516278	0.455	0.283	0.00118353	PTM	ANXA5
LOC101012188	6.58628e-08	0.415393	0.686	0.541	0.00143759	PTM	LOC101012188
FILIP1L	6.67861e-08	0.553716	0.359	0.209	0.00145774	PTM	FILIP1L
EEF1D	6.70536e-08	0.335848	0.821	0.721	0.00146358	PTM	EEF1D
PKIG	7.54756e-08	0.562256	0.282	0.146	0.00164741	PTM	PKIG
RAP1A1	9.93117e-08	0.589699	0.365	0.217	0.00216768	PTM	RAP1A
VASN	9.95926e-08	0.591618	0.346	0.198	0.00217381	PTM	VASN
YBX31	1.06545e-07	0.502033	0.372	0.218	0.00232555	PTM	YBX3
RPLP0	1.73105e-07	0.302649	0.949	0.929	0.00377836	PTM	RPLP0
LOC108581881	2.14312e-07	0.262076	0.962	0.915	0.00467779	PTM	LOC108581881
ITM2C	2.45059e-07	0.595714	0.455	0.298	0.00534889	PTM	ITM2C
COL6A1	3.72059e-07	0.39414	0.295	0.147	0.00812094	PTM	COL6A1
HCFC1R1	6.77752e-07	0.592153	0.34	0.206	0.0147933	PTM	HCFC1R1
EEF1G	9.42328e-07	0.337243	0.84	0.77	0.0205682	PTM	EEF1G
ATF31	1.15464e-06	0.620139	0.282	0.156	0.0252024	PTM	ATF3
LOC1010266471	1.17218e-06	0.397748	0.641	0.496	0.0255851	PTM	LOC101026647
LOC1010141851	1.5319e-06	0.575202	0.449	0.308	0.0334368	PTM	LOC101014185
MTUS1	2.1828e-06	0.600123	0.276	0.15	0.0476441	PTM	MTUS1
CCND2	3.5346e-06	0.486888	0.481	0.36	0.0771497	PTM	CCND2
PMP22	3.65032e-06	0.31199	0.263	0.132	0.0796755	PTM	PMP22
LDHA	4.84262e-06	0.524512	0.41	0.274	0.1057	PTM	LDHA
ACTR2	5.07609e-06	0.4315	0.256	0.137	0.110796	PTM	ACTR2
BAMBI	7.74117e-06	0.460457	0.308	0.185	0.168967	PTM	BAMBI
FOS	9.13749e-06	0.351916	0.776	0.687	0.199444	PTM	FOS
SYPL11	1.3526e-05	0.412349	0.391	0.256	0.295232	PTM	SYPL1
LMNA	2.75063e-05	0.395077	0.571	0.459	0.600379	PTM	LMNA
LOC1010155601	2.79871e-05	0.368494	0.686	0.597	0.610874	PTM	LOC101015560
MYH91	4.21038e-05	0.531776	0.353	0.239	0.918999	PTM	MYH9
CD63	4.96488e-05	0.287084	0.718	0.649	1	PTM	CD63
CRTAP	6.13087e-05	0.401385	0.256	0.151	1	PTM	CRTAP
LOC1010204791	6.68957e-05	0.260589	0.538	0.4	1	PTM	LOC101020479
POMP1	7.12075e-05	0.355119	0.494	0.38	1	PTM	POMP
SDCBP	9.32462e-05	0.342379	0.731	0.625	1	PTM	SDCBP
PLP2	0.000117739	0.381508	0.282	0.175	1	PTM	PLP2
ILK	0.000143007	0.296559	0.327	0.214	1	PTM	ILK
GUCY1A1	0.000154585	0.393927	0.346	0.243	1	PTM	GUCY1A1
LOC1010095031	0.000202673	0.341599	0.314	0.209	1	PTM	LOC101009503
SYNGR2	0.000214409	0.327664	0.269	0.166	1	PTM	SYNGR2
COL18A11	0.000240648	0.548518	0.359	0.251	1	PTM	COL18A1
LOC1010000831	0.00031104	0.271983	0.321	0.208	1	PTM	LOC101000083
SUCLG1	0.000424833	0.492958	0.321	0.229	1	PTM	SUCLG1
G0S2	0.000457409	1.26776	0.308	0.226	1	PTM	G0S2
GADD45B1	0.000472618	0.767022	0.333	0.228	1	PTM	GADD45B
LOC1010217351	0.000558984	0.378241	0.372	0.269	1	PTM	LOC101021735
SMIM4	0.000621923	0.371627	0.276	0.184	1	PTM	SMIM4
MGLL1	0.000645091	0.382627	0.308	0.21	1	PTM	MGLL
LOC1162736241	0.000723099	0.390011	0.635	0.528	1	PTM	LOC116273624
CARHSP1	0.000896466	0.36706	0.397	0.307	1	PTM	CARHSP1
MAT2A	0.00121526	0.416952	0.288	0.202	1	PTM	MAT2A
LOC101019499	0.00122908	0.290264	0.712	0.653	1	PTM	LOC101019499
LAMB2	0.00130295	0.386958	0.301	0.213	1	PTM	LAMB2
VDAC2	0.00130966	0.288123	0.558	0.465	1	PTM	VDAC2
NENF	0.00131684	0.259416	0.513	0.409	1	PTM	NENF
RPS27L	0.00132484	0.26083	0.519	0.42	1	PTM	RPS27L
CAVIN11	0.00139578	0.407046	0.397	0.313	1	PTM	CAVIN1
LOC101013709	0.00142904	0.362346	0.538	0.475	1	PTM	LOC101013709
ATP5ME1	0.00181895	0.35912	0.551	0.485	1	PTM	ATP5ME
TPI1	0.00191325	0.358603	0.526	0.459	1	PTM	TPI1
LOC1010184931	0.00203194	0.411983	0.346	0.264	1	PTM	LOC101018493
MBNL1	0.00204448	0.335361	0.327	0.242	1	PTM	MBNL1
MRPL33	0.0024176	0.280776	0.532	0.456	1	PTM	MRPL33
DKK3	0.00335871	0.437082	0.385	0.304	1	PTM	DKK3
NPM3	0.0041859	0.254945	0.288	0.203	1	PTM	NPM3
MRPL34	0.00421467	0.260733	0.359	0.272	1	PTM	MRPL34
NR4A1	0.00481074	0.660845	0.269	0.193	1	PTM	NR4A1
FOSB	0.004859	0.382936	0.481	0.398	1	PTM	FOSB
ISYNA1	0.00578434	0.275625	0.615	0.552	1	PTM	ISYNA1
PIK3R1	0.00586812	0.315716	0.276	0.199	1	PTM	PIK3R1
FERMT2	0.00592448	0.338089	0.308	0.235	1	PTM	FERMT2
YWHAQ	0.00614867	0.30437	0.545	0.46	1	PTM	YWHAQ
COPS9	0.00728215	0.288204	0.506	0.457	1	PTM	COPS9
PFN2	0.00777454	0.326599	0.288	0.216	1	PTM	PFN2
IGFBP21	0.00779571	0.534485	0.558	0.545	1	PTM	IGFBP2
PPP1CB	0.00933485	0.274676	0.449	0.369	1	PTM	PPP1CB
ARL6IP4	0.00941825	0.358465	0.359	0.297	1	PTM	ARL6IP4
TMEM256	0.00944666	0.280086	0.391	0.309	1	PTM	TMEM256
DCN	0	2.99536	0.945	0.1	0	Leydig	DCN
C7	0	2.51214	0.803	0.073	0	Leydig	C7
IGFBP3	0	2.46974	0.745	0.082	0	Leydig	IGFBP3
IGF2	0	2.30284	0.82	0.091	0	Leydig	IGF2
COL3A1	0	2.27193	0.759	0.082	0	Leydig	COL3A1
COL1A2	0	2.19409	0.737	0.056	0	Leydig	COL1A2
COL1A1	0	2.1795	0.757	0.09	0	Leydig	COL1A1
RARRES2	0	2.1244	0.746	0.076	0	Leydig	RARRES2
IGFBP42	0	2.10436	0.757	0.098	0	Leydig	IGFBP4
MGP	0	2.08241	0.64	0.041	0	Leydig	MGP
OLFML3	0	1.9393	0.631	0.037	0	Leydig	OLFML3
IER22	0	1.80895	0.467	0.11	0	Leydig	IER2
COL6A21	0	1.7945	0.616	0.047	0	Leydig	COL6A2
NRK	0	1.781	0.548	0.036	0	Leydig	NRK
FXYD11	0	1.77747	0.634	0.063	0	Leydig	FXYD1
LOC1010010961	0	1.74768	0.553	0.038	0	Leydig	LOC101001096
NR2F21	0	1.6811	0.596	0.065	0	Leydig	NR2F2
TSHZ21	0	1.67023	0.518	0.034	0	Leydig	TSHZ2
COL6A11	0	1.66765	0.576	0.04	0	Leydig	COL6A1
IGFBP51	0	1.66279	0.665	0.277	0	Leydig	IGFBP5
IGFBP72	0	1.64078	0.73	0.104	0	Leydig	IGFBP7
DPT	0	1.61834	0.499	0.032	0	Leydig	DPT
COL15A11	0	1.58613	0.473	0.04	0	Leydig	COL15A1
IGFBP62	0	1.57035	0.375	0.039	0	Leydig	IGFBP6
TCF21	0	1.54497	0.456	0.027	0	Leydig	TCF21
PMP221	0	1.53471	0.488	0.043	0	Leydig	PMP22
S100A62	0	1.53103	0.355	0.041	0	Leydig	S100A6
LHFPL61	0	1.51244	0.464	0.044	0	Leydig	LHFPL6
CLEC3B1	0	1.50585	0.318	0.03	0	Leydig	CLEC3B
LGALS11	0	1.47325	0.682	0.235	0	Leydig	LGALS1
LOC101026740	0	1.46552	0.428	0.029	0	Leydig	LOC101026740
CALD11	0	1.45137	0.647	0.197	0	Leydig	CALD1
INHBA	0	1.41456	0.392	0.042	0	Leydig	INHBA
NTRK2	0	1.4112	0.428	0.036	0	Leydig	NTRK2
LTBP4	0	1.4013	0.45	0.074	0	Leydig	LTBP4
DHRS2	0	1.40002	0.423	0.035	0	Leydig	DHRS2
SERPINE2	0	1.39533	0.607	0.246	0	Leydig	SERPINE2
HTRA3	0	1.36399	0.378	0.02	0	Leydig	HTRA3
SELENOP	0	1.35599	0.664	0.273	0	Leydig	SELENOP
C1S	0	1.34763	0.368	0.021	0	Leydig	C1S
TGFBR31	0	1.3206	0.442	0.062	0	Leydig	TGFBR3
LOC1010000832	0	1.30681	0.509	0.133	0	Leydig	LOC101000083
EPHX1	0	1.29451	0.455	0.095	0	Leydig	EPHX1
TMSB4X2	0	1.28578	0.819	0.344	0	Leydig	TMSB4X
EBF12	0	1.28261	0.405	0.036	0	Leydig	EBF1
JUND	0	1.27868	0.68	0.492	0	Leydig	JUND
DLK1	0	1.27387	0.274	0.034	0	Leydig	DLK1
LOC116269945	0	1.26793	0.547	0.263	0	Leydig	LOC116269945
ITM2A1	0	1.25867	0.357	0.026	0	Leydig	ITM2A
CEBPD2	0	1.25508	0.368	0.093	0	Leydig	CEBPD
NBL1	0	1.2492	0.465	0.144	0	Leydig	NBL1
MMP2	0	1.22904	0.419	0.104	0	Leydig	MMP2
CPE1	0	1.21911	0.311	0.028	0	Leydig	CPE
NDRG21	0	1.21121	0.381	0.043	0	Leydig	NDRG2
SOD31	0	1.20931	0.345	0.039	0	Leydig	SOD3
LOC1162736242	0	1.20336	0.738	0.476	0	Leydig	LOC116273624
PLPP3	0	1.20091	0.359	0.055	0	Leydig	PLPP3
FOS1	0	1.19385	0.823	0.654	0	Leydig	FOS
SOCS32	0	1.1456	0.289	0.032	0	Leydig	SOCS3
MFAP4	0	1.14528	0.29	0.014	0	Leydig	MFAP4
NUPR11	0	1.1441	0.372	0.07	0	Leydig	NUPR1
LHX9	0	1.12373	0.286	0.016	0	Leydig	LHX9
LOC101009229	0	1.11247	0.303	0.036	0	Leydig	LOC101009229
LOC1162736231	0	1.10672	0.686	0.447	0	Leydig	LOC116273623
CDKN1C	0	1.10644	0.294	0.033	0	Leydig	CDKN1C
GSN2	0	1.1006	0.32	0.055	0	Leydig	GSN
BTG12	0	1.0822	0.732	0.482	0	Leydig	BTG1
RND3	0	1.07796	0.293	0.031	0	Leydig	RND3
COL5A1	0	1.07681	0.288	0.019	0	Leydig	COL5A1
ANGPTL1	0	1.06599	0.29	0.047	0	Leydig	ANGPTL1
OSR1	0	1.06499	0.258	0.025	0	Leydig	OSR1
CTSC	0	1.05692	0.388	0.172	0	Leydig	CTSC
SERPINH12	0	1.04611	0.393	0.134	0	Leydig	SERPINH1
CAVIN21	0	1.0419	0.293	0.03	0	Leydig	CAVIN2
HSPB12	0	1.04126	0.392	0.143	0	Leydig	HSPB1
LOC101001661	0	1.04122	0.469	0.192	0	Leydig	LOC101001661
MDK1	0	1.03655	0.287	0.054	0	Leydig	MDK
JUN	0	1.03503	0.884	0.764	0	Leydig	JUN
RBMS32	0	1.02761	0.283	0.026	0	Leydig	RBMS3
ADIRF2	0	1.00473	0.414	0.167	0	Leydig	ADIRF
TMEM176A	0	0.995058	0.338	0.105	0	Leydig	TMEM176A
APOD2	0	0.991938	0.365	0.042	0	Leydig	APOD
EMP3	0	0.989564	0.529	0.263	0	Leydig	EMP3
AHNAK1	0	0.98868	0.302	0.04	0	Leydig	AHNAK
SELENOM1	0	0.973809	0.558	0.289	0	Leydig	SELENOM
ANXA51	0	0.973091	0.493	0.232	0	Leydig	ANXA5
TIMP1	0	0.948523	0.698	0.436	0	Leydig	TIMP1
FUOM	0	0.94445	0.281	0.034	0	Leydig	FUOM
PPIC1	0	0.930761	0.357	0.148	0	Leydig	PPIC
LOC1010236451	0	0.921833	0.346	0.118	0	Leydig	LOC101023645
EVA1B2	0	0.905777	0.423	0.199	0	Leydig	EVA1B
CD811	0	0.900109	0.862	0.667	0	Leydig	CD81
LOC108586075	0	0.899168	0.571	0.358	0	Leydig	LOC108586075
LOC101023625	0	0.886424	0.961	0.869	0	Leydig	LOC101023625
[truncated: 2,003 more rows]

## Sheet: Fig. 1E-Rhesus
	p_val	avg_logFC	pct.1	pct.2	p_val_adj	cluster	gene
[truncated: 1,490 more rows]

[truncated: 10 more sheets: Fig 1F -Human, Fig. 2D -Human germ cells, Fig. 2E -Baboon germ cells, Fig 2F-Rhesus germ cells, Fig. 3B -Human germ cells, Fig. 3F Conserved SSC markers, Fig. 4A GO analysis, Fig. 4B GO analysis, Fig. 4C GO analysis, Fig. 4D Mouse SSC GO analysis]
